# Supplementary material for: Genome-wide effects of the antimicrobial peptide apidaecin on translation termination in bacteria
Source: eLife. 2020 Oct 8;9:e62655. doi: 10.7554/eLife.62655 (PMC7544508; doi:10.7554/eLife.62655)
Supplement: Source data 1. [file elife-62655-data1.xlsx]

## Sheet: Sheet1
5' Metagene						3' Metagene
nt position from Stop	Api mean replicates A+B	Ctrl mean replicates A+B	Api mean replicates A+B	Ctrl mean replicates A+B	Api+Pmn	nt position from Start	Api mean replicates A+B	Ctrl mean replicates A+B	Api mean replicates A+B	Ctrl mean replicates A+B
-100	0.903836	0.793971	0.0449133	0.0114332	0.495759	-50	1.45192	0.0503106	0.0706792	0.00124978
-99	0.764682	0.714519	0.0156894	0.0278805	0.471042	-49	2.12813	0.0441452	0.0539759	0.00456968
-98	0.571782	0.547896	0.00721916	0.00654826	0.440855	-48	1.58871	0.0306468	0.111125	0.00407122
-97	0.846207	0.713873	0.00821697	0.00321893	0.478116	-47	1.07411	0.0314456	0.083615	0.00321958
-96	0.844604	0.806214	0.0161269	0.00897926	0.520364	-46	1.97092	0.0575941	0.0351475	0.00760109
-95	0.705706	0.597239	0.0455914	0.0148479	0.49496	-45	2.00759	0.0379778	0.0473732	0.00362789
-94	0.945825	0.857238	0.0406762	0.0258886	0.632999	-44	1.83502	0.0814315	0.010635	0.012701
-93	0.791896	0.814872	0.0222429	0.0183026	0.39279	-43	1.04468	0.0496375	0.0220112	0.000650003
-92	0.626334	0.576486	0.052878	0.013065	0.411351	-42	1.0278	0.0533346	0.112561	0.00142796
-91	0.918858	0.768741	0.0170181	0.0334694	0.495003	-41	1.64117	0.101418	0.167545	0.012411
-90	0.953359	0.7358	0.0592821	0.0162915	0.630695	-40	1.57865	0.172049	0.0998585	0.00787895
-89	0.69364	0.591761	0.031098	0.0124395	0.482192	-39	1.40902	0.15501	0.13791	0.0105014
-88	1.15995	0.803405	0.0311274	0.0148741	0.612637	-38	1.59783	0.0781564	0.146443	0.00506973
-87	1.12063	0.760348	0.0700446	0.00277965	0.533114	-37	1.49829	0.0737908	0.144007	0.00201015
-86	0.920164	0.600784	0.0982346	0.011416	0.43501	-36	1.27919	0.183135	0.113911	0.0201455
-85	1.54192	0.901946	0.0186656	0.0115174	0.81583	-35	1.11674	0.0471246	0.0774812	0.00131634
-84	1.43387	0.809597	0.0107506	0.00253521	0.760339	-34	0.597687	0.0330016	0.0727817	0.00122326
-83	0.98829	0.596214	0.105211	0.00161394	0.519981	-33	0.691897	0.0307353	0.0861253	0.00317777
-82	1.86865	0.803037	0.00200561	0.0584013	1.00876	-32	0.583282	0.0240528	0.103237	0.00367494
-81	1.44498	0.76316	0.0679176	0.00793913	0.675351	-31	0.794728	0.0605442	0.130959	0.00177615
-80	1.13501	0.557204	0.0324754	0.0146718	0.517405	-30	0.763626	0.0293609	0.0983172	0.00474528
-79	1.98683	0.991321	0.115902	0.00709538	1.07331	-29	0.77389	0.0238607	0.0507921	0.00437208
-78	1.57196	0.803331	0.0852463	0.0491555	0.803554	-28	0.404289	0.0267894	0.000929336	0.00217002
-77	0.927176	0.550322	0.0018255	0.0106092	0.531796	-27	0.594139	0.108294	0.0312998	0.0208202
-76	1.19014	0.726671	0.0048432	0.00961854	0.651106	-26	0.481467	0.0658468	0.0230817	0.00652815
-75	1.18581	0.759766	0.00717495	0.0222505	0.654501	-25	0.822605	0.0718816	0.00796812	0.000446731
-74	1.00658	0.577392	0.00545125	0.0108154	0.616203	-24	1.00177	0.0892466	0.0435308	0.00516634
-73	1.26477	0.857768	0.0210476	0.00238919	0.690687	-23	0.839176	0.0481135	0.024859	0.00498039
-72	0.92388	0.61536	0.0120383	0.0194607	0.581545	-22	0.84093	0.0661355	0.0572861	0.00120887
-71	0.748522	0.544069	0.0120685	0.0156577	0.487415	-21	0.682582	0.047106	0.00645387	0.00118845
-70	1.18525	0.823002	0.0519396	0.0143264	0.711184	-20	0.574218	0.0678888	0.00559799	0.00208464
-69	0.999652	0.761883	0.00925114	0.00609076	0.646005	-19	0.785107	0.143604	0.0375364	0.000415568
-68	0.798663	0.628203	0.00401363	0.00460769	0.548505	-18	0.643701	0.0612326	0.0393898	0.0114716
-67	1.11548	0.837128	0.0119958	0.0157734	0.689267	-17	0.906467	0.139683	0.000946201	0.00946881
-66	0.794639	0.633249	0.0481839	0.002415	0.53023	-16	1.3122	0.155667	0.0726328	0.00600031
-65	0.682396	0.574963	0.0139059	0.0287437	0.441757	-15	0.570748	0.102342	0.0377457	0.0137603
-64	1.18786	0.709245	0.0581064	0.0178108	0.721104	-14	1.00649	0.398711	0.0543059	0.0389312
-63	0.914882	0.647152	0.0444301	0.0142723	0.551157	-13	2.0651	0.846922	0.176524	0.08178
-62	0.969175	0.595897	0.0697944	0.0184826	0.608171	-12	1.53043	0.394239	0.0103474	0.0631025
-61	1.24485	0.797124	0.0951799	0.0124811	0.82323	-11	2.0378	0.455399	0.018032	0.0418111
-60	1.36681	0.704248	0.0493245	0.0320548	0.620158	-10	2.35907	0.487625	0.0125146	0.0651132
-59	1.42041	0.552953	0.10626	0.0226499	0.713379	-9	2.56079	0.515661	0.0301224	0.0583418
-58	2.1051	0.788004	0.0867622	0.00176129	1.17126	-8	2.43593	0.57248	0.13889	0.0534177
-57	2.06647	0.74817	0.133852	0.0159113	1.0496	-7	3.12282	0.64518	0.0657241	0.0480934
-56	1.80402	0.593235	0.144003	0.000591566	0.956462	-6	2.86075	0.74352	0.141743	0.0626895
-55	2.90413	0.860526	0.174409	0.0311161	1.28369	-5	3.62234	0.943481	0.246022	0.0610684
-54	2.36801	0.770173	0.171144	0.0435175	0.96393	-4	5.42064	1.3514	0.359731	0.0855563
-53	1.57806	0.60808	0.108155	0.0228201	0.897031	-3	5.54332	1.39801	0.245603	0.0920619
-52	2.07045	0.72292	0.065021	0.0122768	0.952773	-2	6.98662	2.32897	0.15924	0.150027
-51	1.97226	0.759256	0.0482417	0.0269519	0.994097	-1	13.5247	6.03749	0.0539733	0.293874
-50	1.48394	0.651524	0.0233453	0.0259235	0.838612	0	12.1355	6.6493	0.175869	0.334061
-49	1.69527	0.697939	0.0757878	0.0433291	0.874639	1	7.19182	3.49161	0.0381164	0.190739
-48	1.3766	0.631141	0.0593033	0.0275416	0.845235	2	4.89707	2.69672	0.0908335	0.138625
-47	1.20919	0.64652	0.0370175	0.0209937	0.721807	3	3.11798	1.82262	0.010845	0.0953587
-46	1.55104	0.867603	0.0539133	0.00202252	1.04983	4	1.68402	0.960716	0.0355357	0.0217519
-45	1.39037	0.791418	0.0161541	0.0447149	0.867875	5	1.7698	1.00162	0.00549348	0.0376104
-44	1.04637	0.555687	0.024245	0.0369252	0.626993	6	1.39963	0.958094	0.0611804	0.0210386
-43	1.34036	0.765046	0.0160219	0.0314749	0.862411	7	1.2383	0.757002	0.0218556	0.0342524
-42	1.20859	0.699751	0.0543359	0.0377516	0.817798	8	1.27265	0.76411	0.115862	0.0174747
-41	1.18731	0.6647	0.0190448	0.0234214	0.786218	9	1.00549	0.639282	0.0698276	0.00225478
-40	1.48126	0.786619	0.0757418	0.0266236	0.929985	10	1.21367	0.778757	0.109579	0.014761
-39	1.36937	0.770326	0.0626223	0.0372381	0.973121	11	1.27377	1.13837	0.125277	0.0524724
-38	1.24933	0.682333	0.00346104	0.0157237	0.742434	12	1.38492	1.01856	0.0524814	0.0224603
-37	1.68164	0.8928	0.0674662	0.00980553	1.15967	13	1.11665	0.834288	0.0776652	0.0274886
-36	1.61076	0.795102	0.0816838	0.0517008	1.00625	14	1.26127	1.19947	0.0787216	0.0407244
-35	1.52009	0.742094	0.0249029	0.0144573	0.933937	15	1.13065	0.993374	0.0562119	0.0323736
-34	2.48959	0.868193	0.172828	0.0396153	1.43862	16	1.09523	0.877844	0.00235707	0.0422562
-33	2.62607	0.710243	0.307298	0.011195	1.4797	17	0.998818	0.928525	0.0261959	0.0101173
-32	2.97099	0.616726	0.209507	0.0115193	1.4346	18	1.01045	0.908517	0.111683	0.00364783
-31	4.64872	0.742556	0.702802	0.0219845	2.10648	19	0.727587	0.704658	0.0416098	0.00508478
-30	4.91205	0.753909	0.712329	0.0084527	1.80661	20	1.13362	0.92897	0.0493749	0.00815813
-29	3.35836	0.57537	0.421537	0.000999786	1.29314	21	0.891519	0.819187	0.0146757	0.00312559
-28	4.8858	0.712256	0.600605	0.00723178	1.7607	22	0.879627	0.800288	0.071391	0.0069093
-27	4.80209	0.742822	0.31175	0.040095	1.63676	23	1.07576	1.10247	0.073435	0.0440614
-26	3.52622	0.559044	0.109397	0.0150527	1.31371	24	1.27	1.14856	0.108368	0.0245399
-25	4.46	0.696463	0.129687	0.00510514	1.58232	25	0.863846	0.875592	0.0468559	0.0274997
-24	3.66724	0.630199	0.0292994	0.012386	1.39148	26	1.19357	1.10337	0.119865	0.0304615
-23	4.02186	0.605601	0.232507	0.0233197	1.59225	27	1.0765	1.28811	0.0820857	0.01949
-22	5.80179	0.897256	0.255025	0.0145572	2.33947	28	0.995657	0.916478	0.0479679	0.0378142
-21	4.92568	0.996153	0.204833	0.00249298	2.13678	29	1.26534	1.17544	0.0974299	0.0236557
-20	6.14313	1.05568	0.53573	0.00264059	2.69996	30	0.868973	0.978636	0.0494371	0.00797731
-19	6.26358	1.2473	0.726092	0.0604668	2.59854	31	0.899522	0.925657	0.062077	0.00602741
-18	4.49144	0.875343	0.425373	0.00872502	1.77612	32	1.10605	1.07372	0.0285898	0.000274512
-17	2.25083	0.272614	0.242969	0.0226107	1.7618	33	0.931727	1.05165	0.0467292	0.0102796
-16	1.54372	0.159687	0.13615	0.00418551	1.83728	34	0.848918	0.900003	0.0634616	0.0015087
-15	2.34267	0.358336	0.317283	0.0157713	1.85861	35	0.951863	1.12949	0.0953805	0.0208131
-14	2.95397	0.382701	0.135732	0.0278511	2.03569	36	0.831763	1.10791	0.0736532	0.0141855
-13	2.49902	0.439391	0.0460388	0.000938262	1.948	37	0.690536	0.831922	0.0294386	0.00289347
-12	2.51135	0.527788	0.0464028	0.0199026	2.03806	38	0.874549	1.04416	0.0164653	0.0148915
-11	2.40678	0.503303	0.0521498	0.0267949	2.18499	39	0.864187	1.07746	0.0255011	0.00305816
-10	2.84972	0.550525	0.0931024	0.0282621	2.41873	40	0.89081	0.88709	0.0395605	0.00380794
-9	3.03463	0.63777	0.122909	0.017245	2.41282	41	1.08241	1.02342	0.0463485	0.0222949
-8	4.07909	0.774106	0.180027	0.0430351	5.84061	42	0.84271	0.941744	0.0201734	0.00878226
-7	15.3488	2.82188	1.33627	0.0335553	41.5973	43	0.732862	0.819388	0.00618296	0.00830176
-6	23.6185	3.19646	1.38152	0.0170525	60.0026	44	0.976207	1.11302	0.0548922	0.0450936
-5	19.3511	1.678	0.869107	0.0154158	34.2565	45	0.85547	1.14028	0.0190825	0.0127829
-4	15.7	0.936809	0.0814462	0.0312307	22.0386	46	0.662375	0.70057	0.00243794	0.00508374
-3	10.7968	0.524947	0.0139771	0.00865727	11.6929	47	0.87469	1.03805	0.00186377	0.0192115
-2	8.2844	0.289185	0.790207	0.017946	5.97259	48	0.976419	1.09931	0.0165705	0.00493509
-1	7.31463	0.236142	0.996097	0.0229086	4.82261	49	0.811018	0.896614	0.0319081	0.0028277
0	8.00232	0.234092	0.898623	0.0119363	5.45142	50	1.1474	1.07703	0.0229571	0.00489543
1	8.46326	0.200131	0.933286	0.00271182	5.33356	51	0.844759	1.10582	0.0145796	0.0232178
2	6.15824	0.178265	0.649425	0.0166547	3.59996	52	1.00849	0.915569	0.00328696	0.0070607
3	5.18641	0.15441	0.513296	0.00419939	3.0912	53	1.03256	1.15118	0.0333389	0.0248345
4	5.33591	0.125362	0.583864	0.00204884	2.77105	54	0.971034	1.17366	0.0245055	0.0226849
5	4.4466	0.107923	0.403825	0.00255397	2.77648	55	1.09707	0.876732	0.0149951	0.00830151
6	4.07949	0.0892838	0.263595	0.00390188	2.27423	56	1.12096	1.12228	0.0628171	0.00488817
7	3.79689	0.0831166	0.00549926	0.00171102	2.44157	57	1.02468	1.06261	0.0253416	0.0110139
8	4.5554	0.0870627	0.120046	1.79026e-05	2.62579	58	0.974795	1.05722	0.00896316	0.00412964
9	5.2849	0.0800997	0.519664	0.00139182	2.51344	59	0.885345	1.20383	0.0225352	0.00311715
10	5.5968	0.0693456	0.476809	0.015542	2.93205	60	0.715364	0.942197	0.00563811	0.00983326
11	5.53656	0.0633071	0.591971	0.0089005	2.81739	61	0.675261	0.899626	0.00734686	0.0326025
12	6.36838	0.0726593	0.837784	0.00141382	2.78973	62	0.836165	1.19568	0.0484832	0.0131421
13	5.62884	0.066849	0.779712	0.00750983	2.84159	63	0.87905	1.37166	0.0291656	0.0261618
14	5.32339	0.0667517	0.713743	0.0145594	2.49812	64	0.804401	0.960438	0.0218253	0.0130861
15	5.74967	0.0620797	0.71882	0.00997643	2.66692	65	0.902805	1.03416	0.0144451	0.0109089
16	4.57924	0.0488154	0.569689	0.00729149	2.4292	66	0.871169	1.22589	0.00428596	0.0091684
17	4.58417	0.0406963	0.831379	0.0061911	2.39879	67	0.883416	1.06206	0.0102089	0.00234638
18	3.93394	0.0395844	0.744016	0.00808223	1.92141	68	0.963586	1.11306	0.0179022	0.0183839
19	3.50479	0.0334706	0.523312	0.0118603	1.88972	69	0.880755	1.15902	0.0277031	0.0063435
20	3.70867	0.026793	0.538142	0.0018701	1.88108	70	0.884749	0.770364	0.00246525	0.000850674
21	3.43673	0.0188078	0.71589	0.00596316	2.19247	71	1.0144	1.38019	0.0521832	0.0117318
22	3.07292	0.0162266	0.654618	0.00669021	1.69818	72	0.862167	1.12268	0.0253321	0.0114043
23	2.67979	0.0156341	0.413494	0.00564363	1.89995	73	0.702431	0.734901	0.038133	0.00305442
24	2.54225	0.0121725	0.421222	0.00687673	1.71697	74	0.850446	1.09588	0.027312	0.0258902
25	2.56368	0.0123471	0.306352	0.00626934	1.60164	75	0.827726	1.2254	0.0175553	0.0166167
26	2.30719	0.0114013	0.409399	0.00508877	1.38473	76	0.708799	1.04075	0.00074287	0.0405507
27	2.18121	0.00657674	0.386271	0.00331439	1.26903	77	0.723322	1.11212	0.00960787	0.00488411
28	1.97594	0.00894826	0.236865	0.0022658	1.42105	78	0.63265	0.991413	0.0131517	0.00153811
29	2.00376	0.00569617	0.29603	0.00398488	1.33297	79	0.905093	0.887045	0.00448822	0.0161279
30	1.94758	0.00373833	0.290623	0.00167697	1.3178	80	0.930308	1.00689	0.01604	0.0242362
31	1.84962	0.00825406	0.164945	7.34003e-05	1.35156	81	0.788567	1.01861	0.0244479	0.000921392
32	1.81097	0.00393674	0.175781	0.00393674	1.25462	82	0.620659	0.845844	0.0111081	0.00621509
33	1.51851	0.00236051	0.166467	0.00153855	1.06065	83	0.979928	1.19933	0.00660228	0.0142686
34	1.51207	0.000853172	0.151863	0.000853172	1.10231	84	0.653439	1.0113	0.0184809	0.0209943
35	1.36256	0.00152587	0.0958512	0.00152587	0.875854	85	0.630164	0.882492	0.0163174	0.0182732
36	1.32755	0.00225663	0.0972037	0.00225663	1.099	86	0.809051	1.09832	0.0275222	0.0316171
37	1.41769	0.00330174	0.119674	0.00330174	1.03746	87	0.777207	1.1795	0.0313553	0.0233341
38	1.30162	0.000480958	0.0455698	0.000480958	1.10946	88	0.750993	0.919066	0.0265738	0.0226526
39	1.32102	0.000614336	0.0988024	0.000614336	0.962797	89	1.03721	1.0358	0.0294585	0.0160727
40	1.05946	0.00190776	0.0647831	0.00190776	0.842349	90	0.699767	0.908713	0.0134316	0.0124036
41	0.831145	0.00014123	0.0365742	0.00014123	0.771251	91	0.922815	1.06975	0.0191435	0.018044
42	1.02604	0.00173658	0.0513878	0.00173658	0.847102	92	1.09992	1.22267	0.0107377	0.000364496
43	1.0782	0.000343107	0.0427584	0.000343107	0.608243	93	0.889498	1.16402	0.0301972	0.0213167
44	1.00842	0.000252124	0.127058	0.000252124	0.719506	94	0.774762	1.0477	0.0123217	0.000879626
45	1.05871	0.000504847	0.0179356	0.000504847	0.826734	95	0.804909	1.15452	0.00447471	0.0146829
46	1.02017	0	0.0464213	0	0.803884	96	0.871121	1.08924	0.00724	0.0294613
47	0.969768	0.00109324	0.00500804	0.00109324	0.697781	97	0.779276	0.923629	0.0111188	0.0041758
48	0.996039	0.0024646	0.0662692	0.0024646	0.789047	98	1.00768	1.26462	0.0590797	0.0185754
49	0.957971	0.000945028	0.101254	0.000945028	0.880662	99	0.785939	1.2451	0.0011018	0.0108055
50	0.859619	0.000787372	0.0500521	0.000787372	0.679431
