# Supplementary material for: Genome-wide effects of the antimicrobial peptide apidaecin on translation termination in bacteria
Source: eLife. 2020 Oct 8;9:e62655. doi: 10.7554/eLife.62655 (PMC7544508; doi:10.7554/eLife.62655)
Supplement: Source data 3. [file elife-62655-data3.xlsx]

## Sheet: Source data 3. Extension peptid
sample	gene	uniprot_id	confidence	PSM	count	reading frame	distance from stop codon (codons))	Spans stop codon?
api05	rplE	A0A140N5A3	high	VGLLNGQAINESTR	0	(+1) fs	1
api05	rplE	A0A140N5A3	high	VGLLNGQAINESTR	1	(+1) fs	1
api05	rplE	A0A140N5A3	high	VGLLNGQAINESTR	2	(+1) fs	1
api05	rplE	A0A140N5A3	high	VGLLNGQAINESTR	3	(+1) fs	1
api05	rplL	A0A140SS63	high	KPTLPVAAWEIR	1	(+1) fs	0	y
api05	rplL	A0A140SS63	high	KPTLPVAAWEIR	3	(+1) fs	0	y
api05	rplL	A0A140SS63	high	KPTLPVAAWEIR	5	(+1) fs	0	y
api05	rplL	A0A140SS63	high	KPTLPVAAWEIR	7	(+1) fs	0	y
api05	rplL	A0A140SS63	high	QANPSGCSLR	0	0 frame	0	y
api05	rplL	A0A140SS63	high	QANPSGCSLR	2	0 frame	0	y
api05	rplL	A0A140SS63	high	QANPSGCSLR	3	0 frame	0	y
api05	rplL	A0A140SS63	high	QANPSGCSLR	4	0 frame	0	y
api05	rplL	A0A140SS63	high	QANPSGCSLR	5	0 frame	0	y
api05	rplL	A0A140SS63	high	QANPSGCSLR	6	0 frame	0	y
api05	rplL	A0A140SS63	high	QANPSGCSLR	7	0 frame	0	y
api05	rpmA	A0A140N340	high	VPVTDESPATR	0	0 frame	4
api05	rpmA	A0A140N340	high	VPVTDESPATR	1	0 frame	4
api05	rpmA	A0A140N340	high	VPVTDESPATR	2	0 frame	4
api05	rpmA	A0A140N340	high	VPVTDESPATR	3	0 frame	4
api05	rpmA	A0A140N340	high	VPVTDESPATR	4	0 frame	4
api05	rpmA	A0A140N340	high	VPVTDESPATR	5	0 frame	4
api05	rpmA	A0A140N340	high	VPVTDESPATR	6	0 frame	4
api05	rpmA	A0A140N340	high	VPVTDESPATR	7	0 frame	4
api05	rpmA	A0A140N340	high	VPVTDESPATR	8	0 frame	4
api05	rpmA	A0A140N340	high	VPVTDESPATR	9	0 frame	4
api05	rpmF	A0A140NAZ2	high	LSEDFPQATGERPNR	0	0 frame	8
api05	rpmF	A0A140NAZ2	high	LSEDFPQATGERPNR	2	0 frame	8
api05	rpmF	A0A140NAZ2	high	LSEDFPQATGERPNR	4	0 frame	8
api05	rpmF	A0A140NAZ2	high	LSEDFPQATGERPNR	5	0 frame	8
api05	rpmI	A0A140N9E3	high	IQIQESTYGSR	0	0 frame	11
api05	rpmI	A0A140N9E3	high	IQIQESTYGSR	1	0 frame	11
api05	rpmI	A0A140N9E3	high	IQIQESTYGSR	3	0 frame	11
api05	rpmI	A0A140N9E3	high	IQIQESTYGSR	4	0 frame	11
api05	rpmI	A0A140N9E3	high	IQIQESTYGSR	5	0 frame	11
api05	rpsF	A0A140NGG7	high	DDFANETADDADAGDSEEQFLMTNR	0	0 frame	-18	y
api05	rpsF	A0A140NGG7	high	DDFANETADDADAGDSEEQFLMTNR	1	0 frame	-18	y
api05	rpsF	A0A140NGG7	high	DDFANETADDADAGDSEEQFLMTNR	3	0 frame	-18	y
api05	rpsF	A0A140NGG7	high	DDFANETADDADAGDSEEQFLMTNR	4	0 frame	-18	y
api05	rpsF	A0A140NGG7	high	RDDFANETADDADAGDSEEQFLMTNR	0	0 frame	-19	y
api05	ackA	A0A140N7M5	low	VPYYYADPYR	0	(+1) fs	26
api05	acrB	A0A140NCT4	low	NEDIEHSHTVDHHLIQR	0	(-1) fs	-13	y
api05	arnC	A0A140N779	low	KPFMVRWLVWR	0	0 frame	39
api05	aroC	A0A140N836	low	DCAAGSACQQRQPGSDAVAK	0	(-1) fs	7
api05	aroG	A0A140NBD3	low	KPTHLQSAFSFQ	0	(-1) fs	38
api05	bamA	A0A140NBL4	low	NVVVVYR	0	(+1) fs	6
api05	bamA	A0A140NBL4	low	NVVVVYR	1	(+1) fs	6
api05	bioA	A0A140NDP9	low	QIAASSCLQR	0	0 frame	32
api05	bolA	A0A140NDA3	low	GAGSIAK	0	(+1) fs	-6	y
api05	bolA	A0A140NDA3	low	GAGSIAK	1	(+1) fs	-6	y
api05	crp	A0A140N3D6	low	AILFPPMWRR	0	(-1) fs	12
api05	cspA	A0A140N4F2	low	GPAAGNVTSLYSLLK	0	0 frame	-10	y
api05	ddlA	A0A140NDF0	low	TTMNILTPDNILIGR	0	(+1) fs	-3	y
api05	ddlA	A0A140NDF0	low	TTMNILTPDNILIGR	1	(+1) fs	-3	y
api05	fabF	A0A140NA92	low	KILSCHFPPIQK	0	(-1) fs	-2	y
api05	fabZ	A0A140NFC7	low	EAWYVIDK	0	0 frame	-2	y
api05	fabZ	A0A140NFC7	low	SREAWYVIDK	0	0 frame	-4	y
api05	fadR	A0A140NCM4	low	NLPGDLAIQGRIIPSVYR	0	(-1) fs	-11	y
api05	fadR	A0A140NCM4	low	NLPGDLAIQGRIIPSVYR	1	(-1) fs	-11	y
api05	frdB	A0A140NF50	low	LNVNRMYGQWRPPGGK	0	(-1) fs	7
api05	glpG	A0A140N5A1	low	GAGGALLR	0	0 frame	29
api05	gltD	A0A140N788	low	AADGIMNWLEVQALSQR	0	0 frame	-11	y
api05	hldE	A0A140N583	low	KGYPESGSQISLR	0	0 frame	-2	y
api05	hldE	A0A140N583	low	KGYPESGSQISLR	1	0 frame	-2	y
api05	hns	A0A140NCH9	low	DFLLSGLR	0	0 frame	15
api05	hns	A0A140NCH9	low	QQSFVDCTCLK	0	0 frame	-1	y
api05	hns	A0A140NCH9	low	QQSFVDCTCLK	1	0 frame	-1	y
api05	ilvA	A0A140ND38	low	FFLAGQGK	0	0 frame	-5	y
api05	kdgK	A0A140N6C7	low	EAMPAVNAAYAK	0	(-1) fs	-5	y
api05	kdsA	A0A140N8Q6	low	YSLSVVR	0	(-1) fs	7
api05	kdsA	A0A140N8Q6	low	YSLSVVR	1	(-1) fs	7
api05	lolE	A0A140NDA8	low	SAVAVGK	0	0 frame	30
api05	lolE	A0A140NDA8	low	SAVAVGK	1	0 frame	30
api05	mgsA	A0A140NBM6	low	FFSISTK	0	(-1) fs	22
api05	mgsA	A0A140NBM6	low	FFSISTK	1	(-1) fs	22
api05	mprA	A0A140N500	low	LDQMEQDGVVLEAMSQR	0	0 frame	-15	y
api05	murJ	A0A140NBC9	low	TVVTMHSGLQCRPEIIFR	0	(-1) fs	-2	y
api05	mutS	A0A140N479	low	KAYFTGQNHAIYTLSK	0	(-1) fs	28
api05	mutS	A0A140N479	low	KAYFTGQNHAIYTLSK	1	(-1) fs	28
api05	osmY	A0A140NFZ6	low	RDVHHTK	0	(+1) fs	13
api05	osmY	A0A140NFZ6	low	RDVHHTK	1	(+1) fs	13
api05	pnp	A0A140N5F4	low	TPCYQPGTGR	0	0 frame	17
api05	prfB	A0A140N6E7	low	AGLWGTNMSEQHAQGADAVVDLNNELK	0	0 frame	-3	y
api05	prfB	A0A140N6E7	low	AGLWGTNMSEQHAQGADAVVDLNNELK	1	0 frame	-3	y
api05	prmA	A0A140N2X4	low	KNWELTQIPLS	0	(-1) fs	39
api05	prmA	A0A140N2X4	low	KNWELTQIPLS	1	(-1) fs	39
api05	proQ	A0A140NB54	low	AEHLVFWNGGR	1	0 frame	-6	y
api05	proQ	A0A140NB54	low	AEHLVFWNGGR	2	0 frame	-6	y
api05	pspB	A0A140NC75	low	LMAGINLNK	0	(-1) fs	0	y
api05	puuR	A0A140NCU8	low	QVIRGSER	0	0 frame	38
api05	puuR	A0A140NCU8	low	QVIRGSER	1	0 frame	38
api05	recC	A0A140N8P0	low	FLLPLFRFNQSMSAVQK	0	(-1) fs	-11	y
api05	recC	A0A140N8P0	low	FLLPLFRFNQSMSAVQK	1	(-1) fs	-11	y
api05	recC	A0A140N8P0	low	FLLPLFRFNQSMSAVQK	2	(-1) fs	-11	y
api05	rlmD	A0A140N8S6	low	ERTMVAVR	0	(-1) fs	14
api05	rnr	A0A140NCR0	low	KVAEWSIPSLK	0	0 frame	-4	y
api05	rnr	A0A140NCR0	low	VAEWSIPSLKEEGQIADK	0	0 frame	-3	y
api05	rplC	A0A140N3G7	low	AQGDSNGISIER	0	0 frame	-1	y
api05	rplC	A0A140N3G7	low	AQGDSNGISIER	1	0 frame	-1	y
api05	rplK	A0A140NF32	low	SMGLVVEDK	0	(+1) fs	-8	y
api05	rplL	A0A140SS63	low	NQADGWWLFSHQPFCAVR	0	0 frame	10
api05	rplL	A0A140SS63	low	NQADGWWLFSHQPFCAVR	1	0 frame	10
api05	rplL	A0A140SS63	low	NQADGWWLFSHQPFCAVR	2	0 frame	10
api05	rplL	A0A140SS63	low	NQADGWWLFSHQPFCAVR	3	0 frame	10
api05	rplL	A0A140SS63	low	NQADGWWLFSHQPFCAVR	4	0 frame	10
api05	rplL	A0A140SS63	low	QANPSGCSLR	1	0 frame	0	y
api05	rplN	A0A140N3H4	low	IISLAPEVLK	2	(+1) fs	-9	y
api05	rplU	A0A140N5D7	low	ITGISAK	0	(+1) fs	-6	y
api05	rplW	C6EGE8	low	EGQNLDFVGGAEK	0	(+1) fs	-12	y
api05	rpmE	A0A140SS71	low	FNIPGSKK	0	(+1) fs	-7	y
api05	rpmE	A0A140SS71	low	FNIPGSKK	1	(+1) fs	-7	y
api05	rpmF	A0A140NAZ2	low	LSEDFPQATGERPNR	1	0 frame	8
api05	rpmF	A0A140NAZ2	low	LSEDFPQATGERPNR	3	0 frame	8
api05	rpmH	A0A140NHV0	low	ANPWVVK	0	(+1) fs	2
api05	rpmI	A0A140N9E3	low	IQIQESTYGSR	2	0 frame	11
api05	rpsC	A0A140N4K1	low	WCYNQSVQNSVK	0	(+1) fs	4
api05	rpsF	A0A140NGG7	low	DDFANETADDADAGDSEEQFLMTNR	2	0 frame	-18	y
api05	rpsG	A0A140N6W8	low	QPALGYLNWTPK	0	0 frame	15
api05	rpsU	A0A140N8B4	low	VVVVRPCFR	0	0 frame	12
api05	sapA	A0A140NCJ1	low	KPMIIFTLR	0	(-1) fs	-2	y
api05	ssb	A0A140NE87	low	KEASVMEASTYQVK	0	0 frame	23
api05	sufS	A0A140NB99	low	LLGITGR	0	(-1) fs	-3	y
api05	talB	A0A140NDV9	low	YLFWSLSVTPFAVYHSVQRDCLNGK	0	0 frame	12
api05	topA	A0A140NCX5	low	KNLQFCQVFINK	0	(+1) fs	-1	y
api05	tpiA	A0A140NEL5	low	AAEAAKQAK	0	(+1) fs	-8	y
api05	tsaB	A0A140N8Y3	low	KESHHGGSK	0	(-1) fs	10
api05	tufA	A0A140N6W0	low	VLGQLHVNQFR	0	0 frame	-3	y
api05	tyrB	A0A140NEW5	low	LELPSLQWNQTVVAFTLSLQMIFLMPSFYVRDNK	0	(-1) fs	6
api05	ubiF	A0A140NEB0	low	KLAEASF	0	(-1) fs	43
api05	yaiL	A0A140NDG6	low	SCADAWCDAMRVLSGLR	0	(-1) fs	5
api05	yaiW	A0A140NCY3	low	NEAAYQK	0	(+1) fs	36
api05	yaiW	A0A140NCY3	low	NEAAYQK	1	(+1) fs	36
api05	ydhR	A0A140N7K1	low	LAWQNLIK	0	0 frame	-2	y
api05	yehU	A0A140N8M9	low	WWTVSTGEPACIFAGAER	0	(+1) fs	7
api05	yiaF	A0A140N692	low	LIAPLPAQHQAFNQAWTTAVTATQQR	0	0 frame	-24	y
api05	yrdA	A0A140N5P6	low	FSASSSR	0	0 frame	10
api05	arcB	A0A140N3P8	normal	KMTPARPGCANTAPTPGK	0	(-1) fs	-1	y
api05	arcB	A0A140N3P8	normal	KMTPARPGCANTAPTPGK	1	(-1) fs	-1	y
api05	arcB	A0A140N3P8	normal	KMTPARPGCANTAPTPGK	2	(-1) fs	-1	y
api05	arcB	A0A140N3P8	normal	KMTPARPGCANTAPTPGK	3	(-1) fs	-1	y
api05	arcB	A0A140N3P8	normal	KMTPARPGCANTAPTPGK	4	(-1) fs	-1	y
api05	arcB	A0A140N3P8	normal	KMTPARPGCANTAPTPGK	5	(-1) fs	-1	y
api05	arcB	A0A140N3P8	normal	KMTPARPGCANTAPTPGK	6	(-1) fs	-1	y
api05	arcB	A0A140N3P8	normal	KMTPARPGCANTAPTPGK	7	(-1) fs	-1	y
api05	arcB	A0A140N3P8	normal	KMTPARPGCANTAPTPGK	8	(-1) fs	-1	y
api05	arcB	A0A140N3P8	normal	KMTPARPGCANTAPTPGK	9	(-1) fs	-1	y
api05	fabD	A0A140NCU1	normal	KLLALRPVK	0	(+1) fs	35
api05	fabD	A0A140NCU1	normal	KLLALRPVK	1	(+1) fs	35
api05	fabD	A0A140NCU1	normal	KLLALRPVK	2	(+1) fs	35
api05	fabD	A0A140NCU1	normal	KLLALRPVK	3	(+1) fs	35
api05	fabD	A0A140NCU1	normal	KLLALRPVK	4	(+1) fs	35
api05	fabD	A0A140NCU1	normal	KLLALRPVK	5	(+1) fs	35
api05	fabD	A0A140NCU1	normal	KLLALRPVK	6	(+1) fs	35
api05	fabD	A0A140NCU1	normal	KLLALRPVK	7	(+1) fs	35
api05	fabD	A0A140NCU1	normal	KLLALRPVK	8	(+1) fs	35
api05	fabG	A0A140ND23	normal	FAQNAHVAR	0	0 frame	3
api05	fabG	A0A140ND23	normal	FAQNAHVAR	1	0 frame	3
api05	fabG	A0A140ND23	normal	FAQNAHVAR	2	0 frame	3
api05	gmhA	A0A140NFF3	normal	TFTPHPAFVR	0	0 frame	8
api05	gmhA	A0A140NFF3	normal	TFTPHPAFVR	1	0 frame	8
api05	hupB	A0A140NFA9	normal	CPQWGCDEVQGR	0	(+1) fs	2
api05	hupB	A0A140NFA9	normal	CPQWGCDEVQGR	1	(+1) fs	2
api05	infB	A0A140N3T4	normal	HGLPDVTLAR	0	(+1) fs	16
api05	infB	A0A140N3T4	normal	HGLPDVTLAR	1	(+1) fs	16
api05	infB	A0A140N3T4	normal	HGLPDVTLAR	2	(+1) fs	16
api05	mgtA	A0A140NDQ8	normal	FNKLQESR	0	0 frame	33
api05	mgtA	A0A140NDQ8	normal	FNKLQESR	1	0 frame	33
api05	mgtA	A0A140NDQ8	normal	FNKLQESR	2	0 frame	33
api05	proQ	A0A140NB54	normal	AEHLVFWNGGR	0	0 frame	-6	y
api05	proQ	A0A140NB54	normal	AEHLVFWNGGR	3	0 frame	-6	y
api05	rplD	A0A140N5K8	normal	QVEEMLAWFVK	0	0 frame	-7	y
api05	rplD	A0A140N5K8	normal	QVEEMLAWFVK	1	0 frame	-7	y
api05	rplD	A0A140N5K8	normal	QVEEMLAWFVK	2	0 frame	-7	y
api05	rplD	A0A140N5K8	normal	WKNPTPSYSK	0	0 frame	23
api05	rplD	A0A140N5K8	normal	WKNPTPSYSK	1	0 frame	23
api05	rplD	A0A140N5K8	normal	WKNPTPSYSK	2	0 frame	23
api05	rplD	A0A140N5K8	normal	WKNPTPSYSK	3	0 frame	23
api05	rplD	A0A140N5K8	normal	WKNPTPSYSK	4	0 frame	23
api05	rplD	A0A140N5K8	normal	WKNPTPSYSK	5	0 frame	23
api05	rplD	A0A140N5K8	normal	WKNPTPSYSK	6	0 frame	23
api05	rplD	A0A140N5K8	normal	WKNPTPSYSK	7	0 frame	23
api05	rplD	A0A140N5K8	normal	WKNPTPSYSK	8	0 frame	23
api05	rplK	A0A140NF32	normal	WLNWPSACVLSAR	0	(+1) fs	2
api05	rplL	A0A140SS63	normal	KPTLPVAAWEIR	0	(+1) fs	0	y
api05	rplL	A0A140SS63	normal	KPTLPVAAWEIR	2	(+1) fs	0	y
api05	rplL	A0A140SS63	normal	KPTLPVAAWEIR	4	(+1) fs	0	y
api05	rplL	A0A140SS63	normal	KPTLPVAAWEIR	6	(+1) fs	0	y
api05	rplL	A0A140SS63	normal	KPTLPVAAWEIR	8	(+1) fs	0	y
api05	rplM	A0A140N598	normal	VPQLAFSSNR	0	(+1) fs	19
api05	rplN	A0A140N3H4	normal	IISLAPEVLK	0	(+1) fs	-9	y
api05	rplN	A0A140N3H4	normal	IISLAPEVLK	1	(+1) fs	-9	y
api05	rpsA	A0A140NBA5	normal	SLLSLLDR	0	0 frame	11
api05	rpsG	A0A140N6W8	normal	SFSHQAGASSK	0	0 frame	4
api05	rpsG	A0A140N6W8	normal	SFSHQAGASSK	1	0 frame	4
api05	rpsI	A0A140N2Z9	normal	QLASAPAENNFR	0	0 frame	0	y
api05	rpsJ	A0A140N6Y5	normal	GWNNDWFSR	0	(+1) fs	8
api05	rpsJ	A0A140N6Y5	normal	GWNNDWFSR	1	(+1) fs	8
api05	rpsJ	A0A140N6Y5	normal	GWNNDWFSR	2	(+1) fs	8
api05	rpsR	A0A140NGH1	normal	VMQVILLDK	0	(-1) fs	14
api05	rpsR	A0A140NGH1	normal	VMQVILLDK	1	(-1) fs	14
api05	rpsR	A0A140NGH1	normal	VMQVILLDK	2	(-1) fs	14
api05	rpsR	A0A140NGH1	normal	VMQVILLDK	3	(-1) fs	14
api05	rpsR	A0A140NGH1	normal	VMQVILLDK	4	(-1) fs	14
api05	tsf	A0A140NFD7	normal	AASFCAHLVNSANPCGAALK	0	0 frame	9
api05	tufB	A0A140NCI6	normal	VLSQLPITFDAMR	0	0 frame	-3	y
api4	rplL	A0A140SS63	high	KPTLPVAAWEIR	1	(+1) fs	0	y
api4	rplL	A0A140SS63	high	KPTLPVAAWEIR	4	(+1) fs	0	y
api4	rplL	A0A140SS63	high	KPTLPVAAWEIR	8	(+1) fs	0	y
api4	rplL	A0A140SS63	high	KPTLPVAAWEIR	9	(+1) fs	0	y
api4	rplL	A0A140SS63	high	KPTLPVAAWEIR	10	(+1) fs	0	y
api4	rplL	A0A140SS63	high	KPTLPVAAWEIR	12	(+1) fs	0	y
api4	rplL	A0A140SS63	high	QANPSGCSLR	0	0 frame	0	y
api4	rplL	A0A140SS63	high	QANPSGCSLR	2	0 frame	0	y
api4	rplL	A0A140SS63	high	QANPSGCSLR	4	0 frame	0	y
api4	rplL	A0A140SS63	high	QANPSGCSLR	5	0 frame	0	y
api4	rplL	A0A140SS63	high	QANPSGCSLR	6	0 frame	0	y
api4	rpmA	A0A140N340	high	VPVTDESPATR	0	0 frame	4
api4	rpmA	A0A140N340	high	VPVTDESPATR	2	0 frame	4
api4	rpmA	A0A140N340	high	VPVTDESPATR	3	0 frame	4
api4	rpmA	A0A140N340	high	VPVTDESPATR	4	0 frame	4
api4	rpmA	A0A140N340	high	VPVTDESPATR	5	0 frame	4
api4	rpmA	A0A140N340	high	VPVTDESPATR	6	0 frame	4
api4	rpmA	A0A140N340	high	VPVTDESPATR	7	0 frame	4
api4	rpmI	A0A140N9E3	high	IQIQESTYGSR	0	0 frame	11
api4	rpmI	A0A140N9E3	high	IQIQESTYGSR	1	0 frame	11
api4	rpmI	A0A140N9E3	high	IQIQESTYGSR	2	0 frame	11
api4	rpsF	A0A140NGG7	high	DDFANETADDADAGDSEEQFLMTNR	0	0 frame	-18	y
api4	rpsF	A0A140NGG7	high	DDFANETADDADAGDSEEQFLMTNR	1	0 frame	-18	y
api4	rpsF	A0A140NGG7	high	DDFANETADDADAGDSEEQFLMTNR	2	0 frame	-18	y
api4	rpsF	A0A140NGG7	high	DDFANETADDADAGDSEEQFLMTNR	3	0 frame	-18	y
api4	tufB	A0A140NCI6	high	VLSQLPITFDAMR	0	0 frame	-3	y
api4	tufB	A0A140NCI6	high	VLSQLPITFDAMR	1	0 frame	-3	y
api4	tufB	A0A140NCI6	high	VLSQLPITFDAMR	2	0 frame	-3	y
api4	tufB	A0A140NCI6	high	VLSQLPITFDAMR	3	0 frame	-3	y
api4	arcA	A0A140NGG3	low	KNGAFQR	0	(-1) fs	8
api4	arnC	A0A140N779	low	KPFMVRWLVWR	0	0 frame	39
api4	arnC	A0A140N779	low	KPFMVRWLVWR	1	0 frame	39
api4	arnC	A0A140N779	low	KPFMVRWLVWR	2	0 frame	39
api4	asnB	A0A140NE23	low	AVGVHQSAYKQEMR	0	0 frame	-10	y
api4	asnB	A0A140NE23	low	AVGVHQSAYKQEMR	1	0 frame	-10	y
api4	bamA	A0A140NBL4	low	NVVVVYR	0	(+1) fs	6
api4	bamA	A0A140NBL4	low	NVVVVYR	1	(+1) fs	6
api4	bioA	A0A140NDP9	low	QIAASSCLQR	0	0 frame	32
api4	bolA	A0A140NDA3	low	GAGSIAK	0	(+1) fs	-6	y
api4	crp	A0A140N3D6	low	AILFPPMWRR	0	(-1) fs	12
api4	fabD	A0A140NCU1	low	KLLALRPVK	0	(+1) fs	35
api4	fabD	A0A140NCU1	low	KLLALRPVK	1	(+1) fs	35
api4	fabF	A0A140NA92	low	KILSCHFPPIQK	0	(-1) fs	-2	y
api4	fabF	A0A140NA92	low	KILSCHFPPIQK	1	(-1) fs	-2	y
api4	fabG	A0A140ND23	low	FAQNAHVAR	0	0 frame	3
api4	hemY	A0A140SSA1	low	DGLMLTLQNNPPQYFFLTR	0	0 frame	-13	y
api4	hemY	A0A140SSA1	low	DGLMLTLQNNPPQYFFLTR	1	0 frame	-13	y
api4	hemY	A0A140SSA1	low	DGLMLTLQNNPPQYFFLTR	2	0 frame	-13	y
api4	hns	A0A140NCH9	low	QQSFVDCTCLK	0	0 frame	-1	y
api4	hns	A0A140NCH9	low	QQSFVDCTCLK	1	0 frame	-1	y
api4	ileS	A0A140ND98	low	KFALMSQSICSTGLR	0	(-1) fs	-3	y
api4	kefB	A0A140N6V8	low	IILILLNALSADIR	0	(+1) fs	31
api4	kefB	A0A140N6V8	low	IILILLNALSADIR	1	(+1) fs	31
api4	opgH	A0A140N956	low	KPDAASQIKTQLPDALR	0	(-1) fs	-7	y
api4	parC	A0A140N5L3	low	NAGWNVKSSSGSVFNPR	0	(-1) fs	14
api4	polA	A0A140NER9	low	KCFLNWTK	0	(-1) fs	36
api4	proQ	A0A140NB54	low	AEHLVFWNGGR	0	0 frame	-6	y
api4	puuR	A0A140NCU8	low	QVIRGSER	0	0 frame	38
api4	puuR	A0A140NCU8	low	QVIRGSER	1	0 frame	38
api4	rplC	A0A140N3G7	low	AQGDSNGISIER	0	0 frame	-1	y
api4	rplK	A0A140NF32	low	SMGLVVEDLR	0	(-1) fs	-8	y
api4	rplL	A0A140SS63	low	QANPSGCSLR	1	0 frame	0	y
api4	rplL	A0A140SS63	low	QANPSGCSLR	3	0 frame	0	y
api4	rplN	A0A140N3H4	low	IISLAPEVLK	0	(+1) fs	-9	y
api4	rplN	A0A140N3H4	low	IISLAPEVLK	1	(+1) fs	-9	y
api4	rplU	A0A140N5D7	low	ITGISAK	0	(+1) fs	-6	y
api4	rplW	C6EGE8	low	EGQNLDFVGGAEKSEEQYNGSCQMQTDISGSSPR	0	(+1) fs	-12	y
api4	rplX	A0A140N5L7	low	NCMITTK	0	0 frame	8
api4	rpmA	A0A140N340	low	VPVTDESPATR	1	0 frame	4
api4	rpsB	A0A140NFK2	low	SQDLASQAEESFVEAEQQGLITPPKQFELQK	0	0 frame	-16	y
api4	rpsF	A0A140NGG7	low	RDDFANETADDADAGDSEEQFLMTNR	0	0 frame	-19	y
api4	rpsI	A0A140N2Z9	low	QLASAPAENNFR	0	0 frame	0	y
api4	rpsR	A0A140NGH1	low	VMQVILLDK	0	(-1) fs	14
api4	rpsR	A0A140NGH1	low	VMQVILLDK	1	(-1) fs	14
api4	talB	A0A140NDV9	low	YLFWSLSVTPFAVYHSVQRDCLNGK	0	0 frame	12
api4	tatA	A0A140NHF3	low	TAIGVHHRPRR	0	(-1) fs	10
api4	tpiA	A0A140NEL5	low	AAEAAKQAK	0	(+1) fs	-8	y
api4	tpiA	A0A140NEL5	low	AAEAAKQAK	1	(+1) fs	-8	y
api4	tusD	A0A140N7G3	low	VVQFLMKR	0	(-1) fs	-4	y
api4	uup	A0A140NAL9	low	NGGLIAK	0	(-1) fs	-3	y
api4	yceH	A0A140NDF8	low	KPCQFVK	0	(-1) fs	42
api4	yfbR	A0A140N9N4	low	QQAPDATSGSCQNGNSIGIITTQTAITIMVNGTPNFTK	0	(-1) fs	10
api4	ygfB	A0A140N652	low	KESVMSEISR	0	(+1) fs	5
api4	yggL	A0A140N5F9	low	LDEVRTSELFDVWWDQESIR	0	0 frame	-15	y
api4	yigE	A0A140NEX4	low	KVLMQDAVWR	0	(+1) fs	0	y
api4	ymdB	A0A140NAX0	low	LPPGIVWPK	0	(-1) fs	32
api4	yrdA	A0A140N5P6	low	FSASSSR	0	0 frame	10
api4	arcB	A0A140N3P8	normal	KMTPARPGCANTAPTPGK	0	(-1) fs	-1	y
api4	arcB	A0A140N3P8	normal	KMTPARPGCANTAPTPGK	1	(-1) fs	-1	y
api4	arcB	A0A140N3P8	normal	KMTPARPGCANTAPTPGK	2	(-1) fs	-1	y
api4	arcB	A0A140N3P8	normal	KMTPARPGCANTAPTPGK	3	(-1) fs	-1	y
api4	arcB	A0A140N3P8	normal	KMTPARPGCANTAPTPGK	4	(-1) fs	-1	y
api4	arcB	A0A140N3P8	normal	KMTPARPGCANTAPTPGK	5	(-1) fs	-1	y
api4	arcB	A0A140N3P8	normal	KMTPARPGCANTAPTPGK	6	(-1) fs	-1	y
api4	arcB	A0A140N3P8	normal	KMTPARPGCANTAPTPGK	7	(-1) fs	-1	y
api4	arcB	A0A140N3P8	normal	KMTPARPGCANTAPTPGK	8	(-1) fs	-1	y
api4	ddlA	A0A140NDF0	normal	TTMNILTPDNILIGR	0	(+1) fs	-3	y
api4	ddlA	A0A140NDF0	normal	TTMNILTPDNILIGR	1	(+1) fs	-3	y
api4	ddlA	A0A140NDF0	normal	TTMNILTPDNILIGR	2	(+1) fs	-3	y
api4	ddlA	A0A140NDF0	normal	TTMNILTPDNILIGR	3	(+1) fs	-3	y
api4	frmB	A0A140NB85	normal	ERLIRPTLRPYTVGLIR	0	(-1) fs	11
api4	frmB	A0A140NB85	normal	ERLIRPTLRPYTVGLIR	1	(-1) fs	11
api4	frmB	A0A140NB85	normal	ERLIRPTLRPYTVGLIR	2	(-1) fs	11
api4	hupB	A0A140NFA9	normal	CPQWGCDEVQGR	0	(+1) fs	2
api4	hupB	A0A140NFA9	normal	CPQWGCDEVQGR	1	(+1) fs	2
api4	kdsA	A0A140N8Q6	normal	YSLSVVR	0	(-1) fs	7
api4	kdsA	A0A140N8Q6	normal	YSLSVVR	1	(-1) fs	7
api4	kdsA	A0A140N8Q6	normal	YSLSVVR	2	(-1) fs	7
api4	kdsA	A0A140N8Q6	normal	YSLSVVR	3	(-1) fs	7
api4	lolE	A0A140NDA8	normal	SAVAVGK	0	0 frame	30
api4	lolE	A0A140NDA8	normal	SAVAVGK	1	0 frame	30
api4	lolE	A0A140NDA8	normal	SAVAVGK	2	0 frame	30
api4	lolE	A0A140NDA8	normal	SAVAVGK	3	0 frame	30
api4	lolE	A0A140NDA8	normal	SAVAVGK	4	0 frame	30
api4	rplL	A0A140SS63	normal	KPTLPVAAWEIR	0	(+1) fs	0	y
api4	rplL	A0A140SS63	normal	KPTLPVAAWEIR	2	(+1) fs	0	y
api4	rplL	A0A140SS63	normal	KPTLPVAAWEIR	3	(+1) fs	0	y
api4	rplL	A0A140SS63	normal	KPTLPVAAWEIR	5	(+1) fs	0	y
api4	rplL	A0A140SS63	normal	KPTLPVAAWEIR	6	(+1) fs	0	y
api4	rplL	A0A140SS63	normal	KPTLPVAAWEIR	7	(+1) fs	0	y
api4	rplL	A0A140SS63	normal	KPTLPVAAWEIR	11	(+1) fs	0	y
api4	rplL	A0A140SS63	normal	KPTLPVAAWEIR	13	(+1) fs	0	y
api4	rplL	A0A140SS63	normal	KPTLPVAAWEIR	14	(+1) fs	0	y
api4	rplL	A0A140SS63	normal	KPTLPVAAWEIR	15	(+1) fs	0	y
api4	rplL	A0A140SS63	normal	KPTLPVAAWEIR	16	(+1) fs	0	y
api4	rplL	A0A140SS63	normal	KPTLPVAAWEIR	17	(+1) fs	0	y
api4	rpmF	A0A140NAZ2	normal	LSEDFPQATGERPNR	0	0 frame	8
api4	rpmF	A0A140NAZ2	normal	LSEDFPQATGERPNR	1	0 frame	8
api4	rpmF	A0A140NAZ2	normal	LSEDFPQATGERPNR	2	0 frame	8
api4	rpmF	A0A140NAZ2	normal	LSEDFPQATGERPNR	3	0 frame	8
api4	rpmF	A0A140NAZ2	normal	LSEDFPQATGERPNR	4	0 frame	8
api4	rpmF	A0A140NAZ2	normal	LSEDFPQATGERPNR	5	0 frame	8
api4	rpmF	A0A140NAZ2	normal	LSEDFPQATGERPNR	6	0 frame	8
api4	rpmF	A0A140NAZ2	normal	LSEDFPQATGERPNR	7	0 frame	8
ctrl	arnC	A0A140N779	low	KPFMVRWLVWR	0	0 frame	39
ctrl	aroG	A0A140NBD3	low	KPTHLQSAFSFQ	0	(-1) fs	38
ctrl	aroG	A0A140NBD3	low	KPTHLQSAFSFQ	1	(-1) fs	38
ctrl	bamA	A0A140NBL4	low	NVVVVYR	0	(+1) fs	6
ctrl	bamA	A0A140NBL4	low	NVVVVYR	1	(+1) fs	6
ctrl	crp	A0A140N3D6	low	AILFPPMWRR	0	(-1) fs	12
ctrl	crp	A0A140N3D6	low	AILFPPMWRR	1	(-1) fs	12
ctrl	crr	A0A140N9A4	low	KVILAAVK	0	(-1) fs	-1	y
ctrl	ddlA	A0A140NDF0	low	TTMNILTPDNILIGR	0	(+1) fs	-3	y
ctrl	ddlA	A0A140NDF0	low	TTMNILTPDNILIGR	1	(+1) fs	-3	y
ctrl	fabH	A0A140N913	low	WNAGWYGGELSNCRR	0	(-1) fs	22
ctrl	glnS	A0A140NAB7	low	VGEVILSFAMPDGAFTSHPAR	0	(-1) fs	-3	y
ctrl	gmhB	A0A140NCS0	low	QQKPAIMIKR	0	(-1) fs	-5	y
ctrl	grxB	A0A140NAB8	low	VAAVFSFFCWR	0	(-1) fs	12
ctrl	hemY	A0A140SSA1	low	DGLMLTLQNNPPQYFFLTR	0	0 frame	-13	y
ctrl	hemY	A0A140SSA1	low	DGLMLTLQNNPPQYFFLTR	1	0 frame	-13	y
ctrl	hemY	A0A140SSA1	low	DGLMLTLQNNPPQYFFLTR	2	0 frame	-13	y
ctrl	hldE	A0A140N583	low	KGYPESGSQISLR	0	0 frame	-2	y
ctrl	hldE	A0A140N583	low	KGYPESGSQISLR	1	0 frame	-2	y
ctrl	ilvA	A0A140ND38	low	FFLAGQGK	0	0 frame	-5	y
ctrl	lolE	A0A140NDA8	low	SAVAVGK	0	0 frame	30
ctrl	mdaB	A0A140N850	low	ELTMLTVIAEIR	0	0 frame	8
ctrl	metL	A0A140NF74	low	DVTAGAIQSDINRLAQLLVISEIQQCPVLMFSGLWFLMK	0	(-1) fs	-18	y
ctrl	mgtA	A0A140NDQ8	low	FNKLQESR	0	0 frame	33
ctrl	pabB	A0A140NAY4	low	KLTGKPYIIVR	0	(+1) fs	22
ctrl	pabB	A0A140NAY4	low	KLTGKPYIIVR	1	(+1) fs	22
ctrl	ppsA	A0A140NB77	low	IISFLNK	0	0 frame	33
ctrl	prfC	A0A140NC65	low	YPDVQFHQTREHYFLPPGR	0	0 frame	-12	y
ctrl	priA	A0A140NDG8	low	ILYPFSR	0	(+1) fs	20
ctrl	proC	A0A140NCE2	low	SLMTFAGR	0	(-1) fs	-1	y
ctrl	puuR	A0A140NCU8	low	QVIRGSER	0	0 frame	38
ctrl	puuR	A0A140NCU8	low	QVIRGSER	1	0 frame	38
ctrl	pyrC	A0A140ND46	low	SQLPVVIR	0	0 frame	2
ctrl	rpsB	A0A140NFK2	low	SQDLASQAEESFVEAEQQGLITPPKQFELQK	0	0 frame	-16	y
ctrl	speD	A0A140N579	low	IATGFLR	0	0 frame	34
ctrl	sucB	A0A140NDX4	low	LLLDVYYFK	0	0 frame	-5	y
ctrl	sufS	A0A140NB99	low	LLGITGR	0	(-1) fs	-3	y
ctrl	sufS	A0A140NB99	low	LLGITGR	1	(-1) fs	-3	y
ctrl	talB	A0A140NDV9	low	YLFWSLSVTPFAVYHSVQRDCLNGK	0	0 frame	12
ctrl	talB	A0A140NDV9	low	YLFWSLSVTPFAVYHSVQRDCLNGK	1	0 frame	12
ctrl	tatA	A0A140NHF3	low	TAIGVHHRPRR	0	(-1) fs	10
ctrl	tolB	A0A140NEI9	low	FPAWSPYLDNNYLNSK	0	(+1) fs	-8	y
ctrl	truB	A0A140N5M2	low	KLFNTLR	0	0 frame	21
ctrl	uidR	A0A140NBI7	low	AGDNWARVSYFNFPVQNTISPER	0	(-1) fs	8
ctrl	yaiL	A0A140NDG6	low	SCADAWCDAMRVLSGLR	0	(-1) fs	5
ctrl	yaiW	A0A140NCY3	low	NEAAYQK	0	(+1) fs	36
ctrl	yaiW	A0A140NCY3	low	NEAAYQK	1	(+1) fs	36
ctrl	ydhQ	A0A140N9W8	low	VAPCLYYR	0	(-1) fs	9
ctrl	yehT	A0A140N8A9	low	EAIGLKR	0	(+1) fs	-5	y
ctrl	yfbR	A0A140N9N4	low	QQAPDATSGSCQNGNSIGIITTQTAITIMVNGTPNFTK	0	(-1) fs	10
ctrl	yfbT	A0A140N9J3	low	WIDLGSFITGR	0	(+1) fs	32
ctrl	yfbT	A0A140N9J3	low	WIDLGSFITGR	1	(+1) fs	32
ctrl	yggL	A0A140N5F9	low	LDEVRTSELFDVWWDQESIR	0	0 frame	-15	y
ctrl	ygiB	A0A140N443	low	SATGTSSRSMGGLIPMER	0	(-1) fs	-12	y
ctrl	yniC	A0A140NBQ7	low	KSYTVTTSVHCIK	0	(-1) fs	29
ctrl	yrdA	A0A140N5P6	low	FSASSSR	0	0 frame	10
ctrl	ysgA	A0A140SS93	low	KVTPYSLNLMIK	0	(-1) fs	-1	y
ctrl	ysgA	A0A140SS93	low	KVTPYSLNLMIK	1	(-1) fs	-1	y
ctrl	arcB	A0A140N3P8	normal	KMTPARPGCANTAPTPGK	0	(-1) fs	-1	y
ctrl	arcB	A0A140N3P8	normal	KMTPARPGCANTAPTPGK	1	(-1) fs	-1	y
ctrl	arcB	A0A140N3P8	normal	KMTPARPGCANTAPTPGK	2	(-1) fs	-1	y
ctrl	arcB	A0A140N3P8	normal	KMTPARPGCANTAPTPGK	3	(-1) fs	-1	y
ctrl	arcB	A0A140N3P8	normal	KMTPARPGCANTAPTPGK	4	(-1) fs	-1	y
ctrl	arcB	A0A140N3P8	normal	KMTPARPGCANTAPTPGK	5	(-1) fs	-1	y
ctrl	arcB	A0A140N3P8	normal	KMTPARPGCANTAPTPGK	6	(-1) fs	-1	y
ctrl	arcB	A0A140N3P8	normal	KMTPARPGCANTAPTPGK	7	(-1) fs	-1	y
ctrl	arcB	A0A140N3P8	normal	KMTPARPGCANTAPTPGK	8	(-1) fs	-1	y
ctrl	fabD	A0A140NCU1	normal	KLLALRPVK	0	(+1) fs	35
ctrl	fabD	A0A140NCU1	normal	KLLALRPVK	1	(+1) fs	35
ctrl	fabD	A0A140NCU1	normal	KLLALRPVK	2	(+1) fs	35
ctrl	fabD	A0A140NCU1	normal	KLLALRPVK	3	(+1) fs	35
ctrl	fabD	A0A140NCU1	normal	KLLALRPVK	4	(+1) fs	35
ctrl	fabD	A0A140NCU1	normal	KLLALRPVK	5	(+1) fs	35
ctrl	fabD	A0A140NCU1	normal	KLLALRPVK	6	(+1) fs	35
ctrl	fabD	A0A140NCU1	normal	KLLALRPVK	7	(+1) fs	35
ctrl	fabD	A0A140NCU1	normal	KLLALRPVK	8	(+1) fs	35
ctrl	fabD	A0A140NCU1	normal	KLLALRPVK	9	(+1) fs	35
ctrl	fabD	A0A140NCU1	normal	KLLALRPVK	10	(+1) fs	35
ctrl	fabD	A0A140NCU1	normal	KLLALRPVK	11	(+1) fs	35
ctrl	fabD	A0A140NCU1	normal	KLLALRPVK	12	(+1) fs	35
ctrl	fabD	A0A140NCU1	normal	KLLALRPVK	13	(+1) fs	35
ctrl	fabD	A0A140NCU1	normal	KLLALRPVK	14	(+1) fs	35
ctrl	fabD	A0A140NCU1	normal	KLLALRPVK	15	(+1) fs	35
ctrl	fabD	A0A140NCU1	normal	KLLALRPVK	16	(+1) fs	35
ctrl	fabD	A0A140NCU1	normal	KLLALRPVK	17	(+1) fs	35
ctrl	fabD	A0A140NCU1	normal	KLLALRPVK	18	(+1) fs	35
ctrl	fabD	A0A140NCU1	normal	KLLALRPVK	19	(+1) fs	35
ctrl	fabD	A0A140NCU1	normal	KLLALRPVK	20	(+1) fs	35
ctrl	fabD	A0A140NCU1	normal	KLLALRPVK	21	(+1) fs	35
ctrl	fabD	A0A140NCU1	normal	KLLALRPVK	22	(+1) fs	35
ctrl	fabF	A0A140NA92	normal	KILSCHFPPIQK	0	(-1) fs	-2	y
ctrl	fabF	A0A140NA92	normal	KILSCHFPPIQK	1	(-1) fs	-2	y
ctrl	fabF	A0A140NA92	normal	KILSCHFPPIQK	2	(-1) fs	-2	y
ctrl	fabF	A0A140NA92	normal	KILSCHFPPIQK	3	(-1) fs	-2	y
ctrl	kdsA	A0A140N8Q6	normal	YSLSVVR	0	(-1) fs	7
ctrl	kdsA	A0A140N8Q6	normal	YSLSVVR	1	(-1) fs	7
ctrl	kdsA	A0A140N8Q6	normal	YSLSVVR	2	(-1) fs	7
ctrl	lolE	A0A140NDA8	normal	SAVAVGK	1	0 frame	30
ctrl	lolE	A0A140NDA8	normal	SAVAVGK	2	0 frame	30
ctrl	lolE	A0A140NDA8	normal	SAVAVGK	3	0 frame	30
ctrl	rpsN	A0A140N7K8	normal	EQRQMSMQDPIADMLTR	0	0 frame	8
ctrl	rpsN	A0A140N7K8	normal	EQRQMSMQDPIADMLTR	1	0 frame	8
ctrl	rpsN	A0A140N7K8	normal	EQRQMSMQDPIADMLTR	2	0 frame	8
ctrl	ubiF	A0A140NEB0	normal	KLAEASF	0	(-1) fs	43
ctrl	ubiF	A0A140NEB0	normal	KLAEASF	1	(-1) fs	43
ctrl	ubiF	A0A140NEB0	normal	KLAEASF	2	(-1) fs	43
