# Supplementary material for: Genome-wide effects of the antimicrobial peptide apidaecin on translation termination in bacteria
Source: eLife. 2020 Oct 8;9:e62655. doi: 10.7554/eLife.62655 (PMC7544508; doi:10.7554/eLife.62655)
Supplement: Source data 4. [file elife-62655-data4.xlsx]

## Sheet: NSAF_CDF_final
					Spec Count			Adjusted percentage amount				Spec Count Ratio		Cumulative distribution function
	Uniprot	Gene	Seq_count_api05	Seq_count_api4	Spec_count_ctrl	Spec_count_api05	Spec_count_api4	NSAF_ctrl	NSAF_api05	NSAF_api4		api5_ctrl	api4_ctrl	cdf1	cdf4	cdf5		Protein.Description
0	A0A140NDR6	B	3	1	1	9	11	2.37282e-06	2.21345e-05	2.76592e-05		9.32835	11.6567	1	1	1		Phage portal protein, lambda family OS=Escherichia coli (strain B / BL21-DE3) OX=469008 GN=ECBD_2871 PE=4 SV=1
1	A0A140NEX1	phoR	6	1	1	7	1	2.93437e-06	2.12899e-05	3.10954e-06		7.25539	1.0597	0.999836	0.779818	1		PAS/PAC sensor signal transduction histidine kinase OS=Escherichia coli (strain B / BL21-DE3) OX=469008 GN=ECBD_3261 PE=4 SV=1
2	A0A140NER5	proP	6	5	3	19	6	7.58827e-06	4.98124e-05	1.60825e-05		6.5644	2.1194	0.734989	0.981423	1		Metabolite/H+ symporter, major facilitator superfamily (MFS) OS=Escherichia coli (strain B / BL21-DE3) OX=469008 GN=ECBD_3920 PE=4 SV=1
3	A0A140N931	astD	4	1	1	6	1	2.57055e-06	1.5986e-05	2.72401e-06		6.2189	1.0597	0.734989	0.779818	1		N-succinylglutamate 5-semialdehyde dehydrogenase OS=Escherichia coli (strain B / BL21-DE3) OX=469008 GN=astD PE=3 SV=1
4	A0A140NA10	cnu	4	2	2	11	2	3.56257e-05	0.00020309	3.77525e-05		5.70066	1.0597	0.972162	0.779818	1		Hemolysin expression modulating family protein OS=Escherichia coli (strain B / BL21-DE3) OX=469008 GN=ECBD_2019 PE=4 SV=1
6	A0A140N609	mutY	5	1	1	5	1	3.61346e-06	1.87265e-05	3.82918e-06		5.18242	1.0597	0.972162	0.779818	0.999999		Adenine DNA glycosylase OS=Escherichia coli (strain B / BL21-DE3) OX=469008 GN=ECBD_0778 PE=3 SV=1
5	A0A140NAK8	trpE	4	3	1	5	3	2.43214e-06	1.26044e-05	7.73199e-06		5.18242	3.17909	0.972162	0.99878	0.999999		Anthranilate synthase component 1 OS=Escherichia coli (strain B / BL21-DE3) OX=469008 GN=ECBD_2358 PE=3 SV=1
8	A0A140NDV7	yaaH	1	1	1	4	2	6.72719e-06	2.78905e-05	1.42576e-05		4.14593	2.1194	0.999999	0.981423	0.999966		GPR1/FUN34/yaaH family protein OS=Escherichia coli (strain B / BL21-DE3) OX=469008 GN=ECBD_3608 PE=4 SV=1
10	A0A140N697	yfiN	1	1	1	4	1	3.1074e-06	1.28831e-05	3.2929e-06		4.14593	1.0597	0.997734	0.779818	0.999966		Diguanylate cyclase OS=Escherichia coli (strain B / BL21-DE3) OX=469008 GN=ECBD_1082 PE=4 SV=1
9	A0A140NDQ8	mgtA	7	2	2	8	3	2.81673e-06	1.1678e-05	4.47732e-06		4.14593	1.58955	0.997734	0.932926	0.999966		Magnesium-translocating P-type ATPase OS=Escherichia coli (strain B / BL21-DE3) OX=469008 GN=ECBD_3791 PE=4 SV=1
7	A0A140NEE8	dpiB	3	3	1	4	3	2.29114e-06	9.49893e-06	7.28376e-06		4.14593	3.17909	0.734989	0.99878	0.999966		Signal transduction histidine kinase regulating citrate/malate metabolism OS=Escherichia coli (strain B / BL21-DE3) OX=469008 GN=ECBD_3031 PE=4 SV=1
12	A0A140N9M9	menB	11	7	8	30	24	3.55007e-05	0.000137984	0.00011286		3.88681	3.17909	0.999557	0.99878	0.999919		1,4-dihydroxy-2-naphthoyl-CoA synthase OS=Escherichia coli (strain B / BL21-DE3) OX=469008 GN=menB PE=3 SV=1
11	A0A140NDG8	priA	3	3	4	15	19	6.91099e-06	2.68617e-05	3.47869e-05		3.88681	5.03357	0.972162	0.999992	0.999919		Primosomal protein N' OS=Escherichia coli (strain B / BL21-DE3) OX=469008 GN=priA PE=3 SV=1
13	A0A140NAP3	araF	1	1	5	18	4	1.92205e-05	7.17184e-05	1.62944e-05		3.73134	0.847759	0.92831	0.660688	0.999863		L-arabinose-binding periplasmic protein OS=Escherichia coli (strain B / BL21-DE3) OX=469008 GN=ECBD_1740 PE=3 SV=1
14	A0A140N7Q5	menF	6	2	2	7	4	5.86873e-06	2.12899e-05	1.24382e-05		3.62769	2.1194	0.972162	0.981423	0.999807		Isochorismate synthase MenF OS=Escherichia coli (strain B / BL21-DE3) OX=469008 GN=menF PE=3 SV=1
28	A0A140SS91	yigP	3	3	5	17	11	3.14605e-05	0.000110868	7.33449e-05		3.52404	2.33134	0.92831	0.989077	0.999727		Sterol-binding domain protein OS=Escherichia coli (strain B / BL21-DE3) OX=469008 GN=ECBD_4189 PE=4 SV=1
16	A0A140NCJ1	sapA	7	2	3	10	2	6.93626e-06	2.39644e-05	4.90023e-06		3.45495	0.706465	0.503795	0.556436	0.999658		Extracellular solute-binding protein family 5 OS=Escherichia coli (strain B / BL21-DE3) OX=469008 GN=ECBD_2323 PE=4 SV=1
17	A0A140N7B6	obgE	20	14	70	227	173	0.000226999	0.000762983	0.000594504		3.36117	2.61897	0.98567	0.994752	0.999535		GTPase Obg OS=Escherichia coli (strain B / BL21-DE3) OX=469008 GN=obg PE=3 SV=1
26	A0A140NAU2	holE	2	1	2	6	1	3.32819e-05	0.000103488	1.76344e-05		3.10945	0.529849	0.972162	0.398904	0.998948		DNA-directed DNA polymerase OS=Escherichia coli (strain B / BL21-DE3) OX=469008 GN=ECBD_1798 PE=4 SV=1
21	A0A140NAH0	fbaB	4	3	2	6	5	7.22692e-06	2.24718e-05	1.91459e-05		3.10945	2.64925	0.999997	0.995145	0.998948		Fructose-bisphosphate aldolase OS=Escherichia coli (strain B / BL21-DE3) OX=469008 GN=ECBD_1560 PE=4 SV=1
25	A0A140N4M7	rppH	2	1	1	3	1	7.18586e-06	2.23441e-05	7.61484e-06		3.10945	1.0597	0.972162	0.779818	0.998948		RNA pyrophosphohydrolase OS=Escherichia coli (strain B / BL21-DE3) OX=469008 GN=rppH PE=3 SV=1
22	A0A140NF06	brnQ	3	2	2	6	5	5.76178e-06	1.7916e-05	1.52644e-05		3.10945	2.64925	0.997734	0.995145	0.998948		Branched-chain amino acid transport system carrier protein OS=Escherichia coli (strain B / BL21-DE3) OX=469008 GN=ECBD_3260 PE=3 SV=1
23	A0A140N4T4	aegA	2	1	3	9	4	5.75741e-06	1.79024e-05	8.13482e-06		3.10945	1.41293	1	0.898978	0.998948		Glutamate synthase, small subunit OS=Escherichia coli (strain B / BL21-DE3) OX=469008 GN=ECBD_1222 PE=4 SV=1
18	A0A140N2W6	dppF	3	3	1	3	7	3.78656e-06	1.17741e-05	2.80883e-05		3.10945	7.41789	0.999999	1	0.998948		Oligopeptide/dipeptide ABC transporter, ATPase subunit OS=Escherichia coli (strain B / BL21-DE3) OX=469008 GN=ECBD_0196 PE=3 SV=1
19	A0A140NBC6	yahA	3	2	1	3	4	3.49368e-06	1.08634e-05	1.4809e-05		3.10945	4.23879	0.972162	0.999929	0.998948		Diguanylate phosphodiesterase OS=Escherichia coli (strain B / BL21-DE3) OX=469008 GN=ECBD_3342 PE=4 SV=1
24	A0A140N9A9	yebA	2	1	1	3	1	2.87434e-06	8.93763e-06	3.04594e-06		3.10945	1.0597	0.997734	0.779818	0.998948		Peptidase M23 OS=Escherichia coli (strain B / BL21-DE3) OX=469008 GN=ECBD_1782 PE=4 SV=1
20	A0A140N917	emrB	1	1	1	3	3	2.47014e-06	7.68078e-06	7.85281e-06		3.10945	3.17909	0.972162	0.99878	0.998948		Drug resistance transporter, EmrB/QacA subfamily OS=Escherichia coli (strain B / BL21-DE3) OX=469008 GN=ECBD_1034 PE=3 SV=1
75	A0A140N9H2	dsdA	16	12	29	75	50	8.29788e-05	0.00022243	0.000151608		2.68056	1.82707	0.851591	0.961938	0.995925		D-serine dehydratase OS=Escherichia coli (strain B / BL21-DE3) OX=469008 GN=dsdA PE=3 SV=1
74	A0A140NDL3	ompX	5	5	11	28	19	8.13557e-05	0.000214643	0.000148912		2.63832	1.83039	0.998883	0.962243	0.995356		Virulence-related outer membrane protein OS=Escherichia coli (strain B / BL21-DE3) OX=469008 GN=ECBD_2809 PE=4 SV=1
29	A0A140NFB9	fdoG	5	2	2	5	2	2.48959e-06	6.45105e-06	2.63821e-06		2.59121	1.0597	0.351139	0.779818	0.994632		Formate dehydrogenase, alpha subunit OS=Escherichia coli (strain B / BL21-DE3) OX=469008 GN=ECBD_4131 PE=3 SV=1
15	A0A140NEF0	ybcU_2	3	4	21	51	53	0.000273803	0.000689211	0.000732281		2.51717	2.67448	0.986168	0.995451	0.993267		Bor family protein OS=Escherichia coli (strain B / BL21-DE3) OX=469008 GN=ECBD_3098 PE=4 SV=1
32	A0A140N2L1	yhfY	1	1	3	7	3	3.16178e-05	7.64664e-05	3.35053e-05		2.41846	1.0597	0.869138	0.779818	0.990921		PRD domain-containing protein OS=Escherichia coli (strain B / BL21-DE3) OX=469008 GN=ECBD_0365 PE=4 SV=1
31	A0A140N7E0	ccmH	6	4	3	7	8	1.08404e-05	2.62171e-05	3.06334e-05		2.41846	2.82586	0.99468	0.996925	0.990921		Cytochrome c-type biogenesis protein OS=Escherichia coli (strain B / BL21-DE3) OX=469008 GN=ECBD_1466 PE=1 SV=1
34	A0A140N8X0	tadA	5	3	5	11	3	3.78656e-05	8.63436e-05	2.40757e-05		2.28026	0.635819	0.734989	0.496747	0.986283		tRNA-specific adenosine deaminase OS=Escherichia coli (strain B / BL21-DE3) OX=469008 GN=tadA PE=3 SV=1
33	A0A140NHQ0	metF	6	4	5	11	4	2.13634e-05	4.87141e-05	1.8111e-05		2.28026	0.847759	0.734989	0.660688	0.986283		Methylenetetrahydrofolate reductase OS=Escherichia coli (strain B / BL21-DE3) OX=469008 GN=ECBD_4082 PE=3 SV=1
287	A0A140NEZ4	phoA	13	7	14	30	15	3.75923e-05	8.34938e-05	4.26819e-05		2.22104	1.13539	0.854742	0.812673	0.983667		Alkaline phosphatase OS=Escherichia coli (strain B / BL21-DE3) OX=469008 GN=ECBD_3281 PE=3 SV=1
188	A0A140NAU1	ybjS	9	6	9	19	11	3.26143e-05	7.13645e-05	4.22416e-05		2.18813	1.29519	0.952656	0.868151	0.982015		NAD-dependent epimerase/dehydratase OS=Escherichia coli (strain B / BL21-DE3) OX=469008 GN=ECBD_2726 PE=4 SV=1
48	A0A140NE59	ftsL	3	3	4	8	4	4.18086e-05	8.66679e-05	4.43045e-05		2.07297	1.0597	0.351139	0.779818	0.974897		Cell division protein FtsL OS=Escherichia coli (strain B / BL21-DE3) OX=469008 GN=ftsL PE=3 SV=1
63	A0A140N994	yddM	2	1	2	4	1	2.69088e-05	5.5781e-05	1.42576e-05		2.07297	0.529849	0.351139	0.398904	0.974897		Plasmid maintenance system antidote protein, XRE family OS=Escherichia coli (strain B / BL21-DE3) OX=469008 GN=ECBD_2162 PE=4 SV=1
66	A0A140N3P1	yggS	5	1	4	8	1	2.1619e-05	4.48155e-05	5.7274e-06		2.07297	0.264925	0.571668	0.139251	0.974897		Pyridoxal phosphate homeostasis protein OS=Escherichia coli (strain B / BL21-DE3) OX=469008 GN=ECBD_0789 PE=3 SV=1
46	A0A140N991	talA	6	6	5	10	9	2.00113e-05	4.14827e-05	3.81706e-05		2.07297	1.90746	0.609201	0.968689	0.974897		Transaldolase OS=Escherichia coli (strain B / BL21-DE3) OX=469008 GN=tal PE=3 SV=1
43	A0A140NFJ5	rhtB	1	2	3	6	7	1.84181e-05	3.81802e-05	4.55412e-05		2.07297	2.47263	0.869138	0.992368	0.974897		Homoserine/threonine efflux pump OS=Escherichia coli (strain B / BL21-DE3) OX=469008 GN=ECBD_4214 PE=4 SV=1
39	A0A140N804	ypdE	2	1	4	8	20	1.46633e-05	3.03966e-05	7.76935e-05		2.07297	5.29849	0.972162	0.999996	0.974897		Glutamyl aminopeptidase OS=Escherichia coli (strain B / BL21-DE3) OX=469008 GN=ECBD_1288 PE=3 SV=1
53	A0A140N670	ygaV	1	1	1	2	1	1.27749e-05	2.64819e-05	1.35375e-05		2.07297	1.0597	0.734989	0.779818	0.974897		Transcriptional regulator, ArsR family OS=Escherichia coli (strain B / BL21-DE3) OX=469008 GN=ECBD_1052 PE=4 SV=1
38	A0A140NGL6	priB	1	1	1	2	6	1.21607e-05	2.52087e-05	7.73199e-05		2.07297	6.35819	0.999836	1	0.974897		Primosomal replication protein N OS=Escherichia coli (strain B / BL21-DE3) OX=469008 GN=priB PE=3 SV=1
60	A0A140NF99	glnK	1	1	1	2	1	1.12921e-05	2.34081e-05	1.19662e-05		2.07297	1.0597	0.972162	0.779818	0.974897		Nitrogen regulatory protein P-II OS=Escherichia coli (strain B / BL21-DE3) OX=469008 GN=ECBD_3205 PE=3 SV=1
65	A0A140NAT4	macA	6	1	3	6	1	1.02268e-05	2.11998e-05	3.61243e-06		2.07297	0.353233	0.997734	0.223524	0.974897		Efflux transporter, RND family, MFP subunit OS=Escherichia coli (strain B / BL21-DE3) OX=469008 GN=ECBD_2716 PE=3 SV=1
62	A0A140N7I5	uspF	2	1	1	2	1	8.78272e-06	1.82063e-05	9.30703e-06		2.07297	1.0597	0.734989	0.779818	0.974897		UspA domain protein OS=Escherichia coli (strain B / BL21-DE3) OX=469008 GN=ECBD_2248 PE=4 SV=1
324	A0A140N6C3	yebT	10	6	6	12	6	8.65253e-06	1.79364e-05	9.16907e-06		2.07297	1.0597	0.812345	0.779818	0.974897		Mammalian cell entry related domain protein OS=Escherichia coli (strain B / BL21-DE3) OX=469008 GN=ECBD_1806 PE=4 SV=1
64	A0A140N727	yfcH	3	1	2	4	1	8.51657e-06	1.76546e-05	4.5125e-06		2.07297	0.529849	0.351139	0.398904	0.974897		Uncharacterized protein OS=Escherichia coli (strain B / BL21-DE3) OX=469008 GN=ECBD_1355 PE=4 SV=1
42	A0A140N5E5	ccmG	2	2	1	2	3	6.83628e-06	1.41714e-05	2.17332e-05		2.07297	3.17909	0.734989	0.99878	0.974897		Redoxin domain protein OS=Escherichia coli (strain B / BL21-DE3) OX=469008 GN=ECBD_1465 PE=4 SV=1
49	A0A140N7P2	mdtA	2	2	2	4	2	6.09499e-06	1.26347e-05	6.45885e-06		2.07297	1.0597	0.734989	0.779818	0.974897		Multidrug resistance protein MdtA OS=Escherichia coli (strain B / BL21-DE3) OX=469008 GN=mdtA PE=2 SV=1
40	A0A140N5I6	yggC	1	2	1	2	3	5.33633e-06	1.1062e-05	1.69647e-05		2.07297	3.17909	0.734989	0.99878	0.974897		Uncharacterized protein OS=Escherichia coli (strain B / BL21-DE3) OX=469008 GN=ECBD_0810 PE=4 SV=1
45	A0A140NGR7	phnK	2	2	1	2	2	5.0187e-06	1.04036e-05	1.06366e-05		2.07297	2.1194	0.972162	0.981423	0.974897		Phosphonate C-P lyase system protein PhnK OS=Escherichia coli (strain B / BL21-DE3) OX=469008 GN=ECBD_3933 PE=4 SV=1
52	A0A140NF39	yahL	1	1	1	2	1	4.66683e-06	9.67419e-06	4.94543e-06		2.07297	1.0597	0.734989	0.779818	0.974897		Uncharacterized protein OS=Escherichia coli (strain B / BL21-DE3) OX=469008 GN=ECBD_3331 PE=4 SV=1
58	A0A140N5Y8	dinD	2	1	1	2	1	4.61573e-06	9.56827e-06	4.89129e-06		2.07297	1.0597	0.734989	0.779818	0.974897		DNA-damage-inducible protein D OS=Escherichia coli (strain B / BL21-DE3) OX=469008 GN=ECBD_0080 PE=4 SV=1
61	A0A140NCY6	efeU	1	1	1	2	1	4.58229e-06	9.49893e-06	4.85584e-06		2.07297	1.0597	0.972162	0.779818	0.974897		FTR1 family protein OS=Escherichia coli (strain B / BL21-DE3) OX=469008 GN=ECBD_2577 PE=4 SV=1
57	C5W7D8	murR	2	1	1	2	1	4.43758e-06	9.19897e-06	4.7025e-06		2.07297	1.0597	0.734989	0.779818	0.974897		HTH-type transcriptional regulator MurR OS=Escherichia coli (strain B / BL21-DE3) OX=469008 GN=murR PE=3 SV=1
37	A0A140NBT8	ytfM	3	4	2	4	13	4.38375e-06	9.08737e-06	3.01954e-05		2.07297	6.88804	0.999957	1	0.974897		Surface antigen (D15) OS=Escherichia coli (strain B / BL21-DE3) OX=469008 GN=ECBD_3810 PE=4 SV=1
54	A0A140N7X7	cysW	1	1	1	2	1	4.34609e-06	9.0093e-06	4.60554e-06		2.07297	1.0597	0.999836	0.779818	0.974897		Sulfate ABC transporter, inner membrane subunit OS=Escherichia coli (strain B / BL21-DE3) OX=469008 GN=ECBD_1258 PE=4 SV=1
59	A0A140N9V9	yfcJ	1	1	1	2	1	3.2263e-06	6.68802e-06	3.41891e-06		2.07297	1.0597	0.734989	0.779818	0.974897		Uncharacterized MFS-type transporter YfcJ OS=Escherichia coli (strain B / BL21-DE3) OX=469008 GN=yfcJ PE=3 SV=1
55	A0A140N8F7	baeS	2	1	1	2	1	2.70816e-06	5.61393e-06	2.86983e-06		2.07297	1.0597	0.734989	0.779818	0.974897		Histidine kinase OS=Escherichia coli (strain B / BL21-DE3) OX=469008 GN=ECBD_1575 PE=4 SV=1
50	A0A140N715	ygcU	2	1	1	2	1	2.61304e-06	5.41675e-06	2.76903e-06		2.07297	1.0597	0.734989	0.779818	0.974897		Alkylglycerone-phosphate synthase OS=Escherichia coli (strain B / BL21-DE3) OX=469008 GN=ECBD_0957 PE=4 SV=1
56	A0A140NGS7	alsA	1	1	1	2	1	2.47983e-06	5.1406e-06	2.62787e-06		2.07297	1.0597	0.734989	0.779818	0.974897		ABC transporter related OS=Escherichia coli (strain B / BL21-DE3) OX=469008 GN=ECBD_3943 PE=4 SV=1
51	A0A140NFK6	yacH	1	1	1	2	1	2.04978e-06	4.24912e-06	2.17214e-06		2.07297	1.0597	0.734989	0.779818	0.974897		Uncharacterized protein OS=Escherichia coli (strain B / BL21-DE3) OX=469008 GN=ECBD_3502 PE=4 SV=1
44	A0A140ND60	yagX	2	2	1	2	2	1.50382e-06	3.11737e-06	3.18719e-06		2.07297	2.1194	0.972162	0.981423	0.974897		Uncharacterized protein OS=Escherichia coli (strain B / BL21-DE3) OX=469008 GN=ECBD_3366 PE=4 SV=1
41	A0A140NC37	ydbH	1	2	1	2	3	1.43881e-06	2.9826e-06	4.5741e-06		2.07297	3.17909	0.997734	0.99878	0.974897		DctA-YdbH domain-containing protein OS=Escherichia coli (strain B / BL21-DE3) OX=469008 GN=ECBD_2242 PE=4 SV=1
81	A0A140NBG8	ydiY	7	6	17	33	29	8.53178e-05	0.000171659	0.000154231		2.012	1.80772	0.972162	0.960117	0.970125		Uncharacterized protein OS=Escherichia coli (strain B / BL21-DE3) OX=469008 GN=ECBD_1923 PE=4 SV=1
67	A0A140N9F1	fadL	7	6	19	35	36	5.38778e-05	0.00010287	0.000108179		1.90931	2.00785	0.94103	0.975518	0.960116		Membrane protein involved in aromatic hydrocarbon degradation OS=Escherichia coli (strain B / BL21-DE3) OX=469008 GN=ECBD_1316 PE=4 SV=1
69	A0A140N4H7	yidK	1	1	6	11	1	1.32894e-05	2.52529e-05	2.34713e-06		1.90022	0.176616	0.351139	0.0669504	0.959094		SSS sodium solute transporter superfamily OS=Escherichia coli (strain B / BL21-DE3) OX=469008 GN=ECBD_0023 PE=3 SV=1
70	A0A140NIA8	pstA	2	1	5	9	5	2.13634e-05	3.9857e-05	2.26387e-05		1.86567	1.0597	0.445075	0.779818	0.954982		Phosphate transport system permease protein PstA OS=Escherichia coli (strain B / BL21-DE3) OX=469008 GN=ECBD_4306 PE=3 SV=1
71	A0A140N8C1	gcvA	6	2	5	9	2	2.0733e-05	3.86809e-05	8.78828e-06		1.86567	0.423879	0.972162	0.294183	0.954982		Transcriptional regulator, LysR family OS=Escherichia coli (strain B / BL21-DE3) OX=469008 GN=ECBD_0914 PE=3 SV=1
68	A0A140N500	mprA	9	6	59	106	105	0.000423966	0.000789491	0.000799558		1.86216	1.8859	0.924285	0.967001	0.954543		Transcriptional regulator, MarR family OS=Escherichia coli (strain B / BL21-DE3) OX=469008 GN=ECBD_1036 PE=4 SV=1
95	A0A140N6Y5	rpsJ	14	14	841	1509	1312	0.0103264	0.0192046	0.0170714		1.85975	1.65318	0.941613	0.942277	0.95424		30S ribosomal protein S10 OS=Escherichia coli (strain B / BL21-DE3) OX=469008 GN=rpsJ PE=3 SV=1
47	A0A140SS73	glpK	22	23	57	100	109	0.000143603	0.000261126	0.000291002		1.81839	2.02644	0.953946	0.976615	0.948732		Glycerol kinase OS=Escherichia coli (strain B / BL21-DE3) OX=469008 GN=glpK PE=3 SV=1
231	A0A140N4Y7	deaD	38	34	279	489	320	0.000560977	0.00101909	0.000681825		1.81663	1.21542	0.881015	0.842637	0.948485		ATP-dependent RNA helicase DeaD OS=Escherichia coli (strain B / BL21-DE3) OX=469008 GN=deaD PE=3 SV=1
77	A0A140NFI8	yacL	2	2	4	7	4	4.2157e-05	7.64664e-05	4.46737e-05		1.81385	1.0597	0.734989	0.779818	0.948091		UPF0231 protein YacL OS=Escherichia coli (strain B / BL21-DE3) OX=469008 GN=yacL PE=3 SV=1
78	A0A140NDQ2	yccF	3	2	4	7	4	3.41814e-05	6.19998e-05	3.6222e-05		1.81385	1.0597	0.734989	0.779818	0.948091		Uncharacterized protein OS=Escherichia coli (strain B / BL21-DE3) OX=469008 GN=ECBD_2633 PE=4 SV=1
72	A0A140NBP4	rlmF	5	5	8	14	14	3.28496e-05	5.95842e-05	6.09187e-05		1.81385	1.85447	0.949453	0.964383	0.948091		Ribosomal RNA large subunit methyltransferase F OS=Escherichia coli (strain B / BL21-DE3) OX=469008 GN=rlmF PE=3 SV=1
80	A0A140N980	ypfH	4	1	4	7	1	2.18054e-05	3.95516e-05	5.77678e-06		1.81385	0.264925	0.351139	0.139251	0.948091		Phospholipase/Carboxylesterase OS=Escherichia coli (strain B / BL21-DE3) OX=469008 GN=ECBD_1216 PE=4 SV=1
79	A0A140N4Q1	rfaC	6	1	4	7	2	1.55179e-05	2.81471e-05	8.22216e-06		1.81385	0.529849	0.734989	0.398904	0.948091		Lipopolysaccharide heptosyltransferase I OS=Escherichia coli (strain B / BL21-DE3) OX=469008 GN=ECBD_0105 PE=4 SV=1
76	A0A140NAA6	elaB	4	2	7	12	12	8.76533e-05	0.000155745	0.000159233		1.77683	1.81663	0.734989	0.960965	0.942587		Uncharacterized protein OS=Escherichia coli (strain B / BL21-DE3) OX=469008 GN=ECBD_1392 PE=4 SV=1
82	A0A140N8K4	hypF	1	2	10	17	4	1.68628e-05	2.97127e-05	7.1478e-06		1.76202	0.423879	0.982909	0.294183	0.940239		Carbamoyltransferase HypF OS=Escherichia coli (strain B / BL21-DE3) OX=469008 GN=ECBD_1013 PE=3 SV=1
27	A0A140NBD0	ynhG	4	3	6	10	14	2.27194e-05	3.92471e-05	5.61766e-05		1.72747	2.47263	0.909875	0.992368	0.934415		ErfK/YbiS/YcfS/YnhG family protein OS=Escherichia coli (strain B / BL21-DE3) OX=469008 GN=ECBD_1967 PE=4 SV=1
562	A0A140N7C8	smpB	4	3	6	10	5	4.74267e-05	8.19283e-05	4.18816e-05		1.72747	0.883082	0.909875	0.683554	0.934415		SsrA-binding protein OS=Escherichia coli (strain B / BL21-DE3) OX=469008 GN=smpB PE=3 SV=1
84	A0A140N8N7	molR	2	2	3	5	3	3.00169e-06	5.18533e-06	3.18088e-06		1.72747	1.0597	0.869138	0.779818	0.934415		WGR domain protein OS=Escherichia coli (strain B / BL21-DE3) OX=469008 GN=ECBD_1543 PE=4 SV=1
126	A0A140NF32	rplK	14	9	376	616	559	0.00334881	0.00568652	0.00527591		1.69807	1.57546	0.951622	0.93067	0.929056		50S ribosomal protein L11 OS=Escherichia coli (strain B / BL21-DE3) OX=469008 GN=rplK PE=3 SV=1
207	A0A140N719	rimM	14	11	80	130	95	0.000555917	0.000936323	0.000699561		1.68429	1.25839	0.914858	0.856887	0.92641		Ribosome maturation factor RimM OS=Escherichia coli (strain B / BL21-DE3) OX=469008 GN=rimM PE=3 SV=1
89	A0A140N5A3	rplE	25	21	957	1553	1540	0.00676161	0.0113729	0.0115303		1.68198	1.70526	0.953082	0.949	0.925959		50S ribosomal protein L5 OS=Escherichia coli (strain B / BL21-DE3) OX=469008 GN=rplE PE=3 SV=1
99	A0A140NAZ7	mipA	4	3	13	21	20	6.62954e-05	0.000111	0.000108082		1.67432	1.6303	0.959738	0.939067	0.92444		MltA-interacting MipA family protein OS=Escherichia coli (strain B / BL21-DE3) OX=469008 GN=ECBD_1862 PE=4 SV=1
90	A0A140NCU6	yceB	6	3	10	16	4	6.79952e-05	0.000112762	2.88218e-05		1.65837	0.423879	0.784126	0.294183	0.921191		Uncharacterized protein OS=Escherichia coli (strain B / BL21-DE3) OX=469008 GN=ECBD_2537 PE=4 SV=1
789	A0A140N6D2	yebO	4	3	12	19	8	0.000159753	0.000262171	0.00011286		1.6411	0.706465	0.972162	0.556436	0.917528		Uncharacterized protein YebO OS=Escherichia coli (strain B / BL21-DE3) OX=469008 GN=ECBD_1816 PE=4 SV=1
718	A0A140NFA6	ykgM	3	3	7	11	5	0.000100602	0.000163857	7.61484e-05		1.62876	0.756927	0.894109	0.596027	0.914819		50S ribosomal protein L31 type B OS=Escherichia coli (strain B / BL21-DE3) OX=469008 GN=rpmE2 PE=3 SV=1
36	A0A140NB44	phoB	9	8	16	25	31	8.83641e-05	0.000143106	0.000181426		1.61951	2.05317	0.98892	0.978108	0.912734		Two component transcriptional regulator PhoB, winged helix family OS=Escherichia coli (strain B / BL21-DE3) OX=469008 GN=ECBD_3262 PE=4 SV=1
94	A0A140NBR1	yjgM	5	1	9	14	2	6.81581e-05	0.000109892	1.60504e-05		1.61231	0.235488	0.503795	0.113356	0.911082		GCN5-related N-acetyltransferase OS=Escherichia coli (strain B / BL21-DE3) OX=469008 GN=ECBD_3780 PE=4 SV=1
1136	A0A140NED7	lipB	5	2	11	17	5	6.53137e-05	0.000104622	3.14604e-05		1.60184	0.481681	0.62224	0.351859	0.908628		Octanoyltransferase OS=Escherichia coli (strain B / BL21-DE3) OX=469008 GN=lipB PE=3 SV=1
112	A0A140N5L7	rplX	18	18	1060	1629	1610	0.0128903	0.0205325	0.0207475		1.59286	1.60954	0.921472	0.936008	0.906476		50S ribosomal protein L24 OS=Escherichia coli (strain B / BL21-DE3) OX=469008 GN=rplX PE=3 SV=1
30	A0A140N7F5	rpmC	5	7	165	251	344	0.00331234	0.0052226	0.00731798		1.57671	2.20931	0.930287	0.985155	0.90249		50S ribosomal protein L29 OS=Escherichia coli (strain B / BL21-DE3) OX=469008 GN=rpmC PE=3 SV=1
196	A0A140N4F2	cspA	8	8	277	419	335	0.00500464	0.00784639	0.00641387		1.56782	1.28158	0.89263	0.864084	0.900233		Cold-shock DNA-binding domain protein OS=Escherichia coli (strain B / BL21-DE3) OX=469008 GN=ECBD_0180 PE=4 SV=1
113	A0A140N3L9	rpmB	11	9	555	835	841	0.00899891	0.0140328	0.0144502		1.55939	1.60578	0.916461	0.935438	0.898049		50S ribosomal protein L28 OS=Escherichia coli (strain B / BL21-DE3) OX=469008 GN=rpmB PE=3 SV=1
114	A0A140N7S1	rimP	6	2	8	12	4	7.22692e-05	0.000112359	3.82918e-05		1.55473	0.529849	0.984891	0.398904	0.896822		Ribosome maturation factor RimP OS=Escherichia coli (strain B / BL21-DE3) OX=469008 GN=rimP PE=3 SV=1
1053	A0A140NBV9	yncE	9	4	12	18	6	4.2993e-05	6.68423e-05	2.27798e-05		1.55473	0.529849	0.687233	0.398904	0.896822		Uncharacterized protein OS=Escherichia coli (strain B / BL21-DE3) OX=469008 GN=ECBD_2187 PE=4 SV=1
121	A0A140NCG8	ydcY	2	1	2	3	1	3.28496e-05	5.10722e-05	1.74054e-05		1.55473	0.529849	0.734989	0.398904	0.896822		Uncharacterized protein OS=Escherichia coli (strain B / BL21-DE3) OX=469008 GN=ECBD_2193 PE=4 SV=1
122	A0A140N9R8	dsbG	7	1	6	9	1	2.99932e-05	4.66311e-05	5.29728e-06		1.55473	0.176616	0.189637	0.0669504	0.896822		Thiol:disulfide interchange protein OS=Escherichia coli (strain B / BL21-DE3) OX=469008 GN=ECBD_3048 PE=3 SV=1
106	A0A140NEU3	ybl13	1	1	2	3	2	2.45575e-05	3.81802e-05	2.60235e-05		1.55473	1.0597	0.909875	0.779818	0.896822		Uncharacterized protein OS=Escherichia coli (strain B / BL21-DE3) OX=469008 GN=ECBD_3231 PE=4 SV=1
115	A0A140N6C7	kdgK	6	2	6	9	3	2.45575e-05	3.81802e-05	1.30118e-05		1.55473	0.529849	0.189637	0.398904	0.896822		PfkB domain protein OS=Escherichia coli (strain B / BL21-DE3) OX=469008 GN=ECBD_0213 PE=4 SV=1
860	A0A140N5Y3	cca	8	3	8	12	5	2.45575e-05	3.81802e-05	1.62647e-05		1.55473	0.662311	0.660891	0.519695	0.896822		Multifunctional CCA protein OS=Escherichia coli (strain B / BL21-DE3) OX=469008 GN=cca PE=3 SV=1
116	A0A140N707	chpA	3	1	2	3	1	2.27876e-05	3.54284e-05	1.2074e-05		1.55473	0.529849	0.734989	0.398904	0.896822		Transcriptional modulator of MazE/toxin, MazF OS=Escherichia coli (strain B / BL21-DE3) OX=469008 GN=ECBD_0947 PE=4 SV=1
105	A0A140N573	livF	1	1	4	6	4	2.13453e-05	3.31861e-05	2.26196e-05		1.55473	1.0597	0.734989	0.779818	0.896822		High-affinity branched-chain amino acid transport ATP-binding protein OS=Escherichia coli (strain B / BL21-DE3) OX=469008 GN=ECBD_0287 PE=3 SV=1
111	A0A140N6P4	mazG	3	2	4	6	3	1.92352e-05	2.99054e-05	1.52876e-05		1.55473	0.794774	0.984891	0.624003	0.896822		MazG family protein OS=Escherichia coli (strain B / BL21-DE3) OX=469008 GN=ECBD_0948 PE=4 SV=1
108	A0A140NHA5	phnG	3	2	2	3	2	1.68628e-05	2.62171e-05	1.78695e-05		1.55473	1.0597	0.909875	0.779818	0.896822		Phosphonate C-P lyase system protein PhnG OS=Escherichia coli (strain B / BL21-DE3) OX=469008 GN=ECBD_3929 PE=4 SV=1
104	A0A140NAG5	yedY	1	1	4	6	4	1.51462e-05	2.35482e-05	1.60504e-05		1.55473	1.0597	0.571668	0.779818	0.896822		Protein-methionine-sulfoxide reductase catalytic subunit MsrP OS=Escherichia coli (strain B / BL21-DE3) OX=469008 GN=msrP PE=3 SV=1
110	A0A140N9F8	ydiU	5	2	4	6	3	1.05834e-05	1.64542e-05	8.41137e-06		1.55473	0.794774	0.351139	0.624003	0.896822		Protein adenylyltransferase SelO OS=Escherichia coli (strain B / BL21-DE3) OX=469008 GN=selO PE=3 SV=1
118	A0A140N6R5	sufC	2	1	2	3	1	1.01993e-05	1.58571e-05	5.40408e-06		1.55473	0.529849	0.351139	0.398904	0.896822		FeS assembly ATPase SufC OS=Escherichia coli (strain B / BL21-DE3) OX=469008 GN=ECBD_1963 PE=4 SV=1
117	A0A140N8Z4	mtfA	2	1	2	3	1	9.54499e-06	1.48398e-05	5.0574e-06		1.55473	0.529849	0.351139	0.398904	0.896822		Protein MtfA OS=Escherichia coli (strain B / BL21-DE3) OX=469008 GN=mtfA PE=3 SV=1
103	A0A140N7S4	aaeA	2	2	2	3	3	8.15943e-06	1.26857e-05	1.29698e-05		1.55473	1.58955	0.351139	0.932926	0.896822		p-hydroxybenzoic acid efflux pump subunit AaeA OS=Escherichia coli (strain B / BL21-DE3) OX=469008 GN=aaeA PE=2 SV=1
107	A0A140N9Z2	dusC	3	1	2	3	2	8.02991e-06	1.24843e-05	8.50928e-06		1.55473	1.0597	0.734989	0.779818	0.896822		tRNA-dihydrouridine(16) synthase OS=Escherichia coli (strain B / BL21-DE3) OX=469008 GN=dusC PE=3 SV=1
102	A0A140N8Z9	yeaJ	2	2	2	3	3	5.09964e-06	7.92854e-06	8.10612e-06		1.55473	1.58955	0.909875	0.932926	0.896822		Diguanylate cyclase OS=Escherichia coli (strain B / BL21-DE3) OX=469008 GN=ECBD_1858 PE=4 SV=1
101	A0A140N9B2	ansP	3	2	2	3	4	5.06898e-06	7.88088e-06	1.07432e-05		1.55473	2.1194	0.351139	0.981423	0.896822		Amino acid permease-associated region OS=Escherichia coli (strain B / BL21-DE3) OX=469008 GN=ECBD_2186 PE=4 SV=1
120	A0A140N816	cvrA	2	1	2	3	1	4.37616e-06	6.80373e-06	2.31871e-06		1.55473	0.529849	0.734989	0.398904	0.896822		K(+)/H(+) antiporter NhaP2 OS=Escherichia coli (strain B / BL21-DE3) OX=469008 GN=nhaP2 PE=3 SV=1
119	A0A140NB04	narX	3	1	2	3	1	4.2298e-06	6.57618e-06	2.24116e-06		1.55473	0.529849	0.734989	0.398904	0.896822		Sensor protein OS=Escherichia coli (strain B / BL21-DE3) OX=469008 GN=ECBD_2397 PE=4 SV=1
100	A0A140N8U2	ptrB	2	2	2	3	12	3.68721e-06	5.73259e-06	2.34439e-05		1.55473	6.35819	1	1	0.896822		Oligopeptidase B OS=Escherichia coli (strain B / BL21-DE3) OX=469008 GN=ECBD_1795 PE=4 SV=1
109	A0A140NB30	fiu	2	2	2	3	2	3.32819e-06	5.17442e-06	3.52687e-06		1.55473	1.0597	0.734989	0.779818	0.896822		TonB-dependent siderophore receptor OS=Escherichia coli (strain B / BL21-DE3) OX=469008 GN=ECBD_2818 PE=3 SV=1
150	A0A140NDP9	bioA	9	8	17	25	23	5.01168e-05	7.639e-05	7.18529e-05		1.52424	1.43371	0.951173	0.903672	0.888479		Adenosylmethionine-8-amino-7-oxononanoate aminotransferase OS=Escherichia coli (strain B / BL21-DE3) OX=469008 GN=bioA PE=3 SV=1
91	A0A140N7G4	rpmD	10	10	233	341	373	0.00499454	0.00757628	0.00847287		1.51691	1.69643	0.936492	0.947915	0.886387		50S ribosomal protein L30 OS=Escherichia coli (strain B / BL21-DE3) OX=469008 GN=rpmD PE=3 SV=1
671	A0A140N7Q1	udk	6	5	24	35	18	0.000142503	0.000215398	0.000113257		1.51154	0.794774	0.776522	0.624003	0.884831		Uridine kinase OS=Escherichia coli (strain B / BL21-DE3) OX=469008 GN=udk PE=3 SV=1
1003	A0A140NCA5	rlmH	5	4	11	16	6	8.97537e-05	0.000135314	5.18792e-05		1.50761	0.578017	0.918743	0.444487	0.883682		Ribosomal RNA large subunit methyltransferase H OS=Escherichia coli (strain B / BL21-DE3) OX=469008 GN=rlmH PE=3 SV=1
87	A0A140N5B4	rpsM	11	11	1108	1609	1846	0.0118754	0.0178743	0.0209664		1.50515	1.76553	0.927288	0.955851	0.882956		30S ribosomal protein S13 OS=Escherichia coli (strain B / BL21-DE3) OX=469008 GN=rpsM PE=3 SV=1
283	A0A140N3H4	rplN	10	13	548	792	590	0.00563465	0.00844061	0.00642866		1.49798	1.14092	0.892425	0.814893	0.880823		50S ribosomal protein L14 OS=Escherichia coli (strain B / BL21-DE3) OX=469008 GN=rplN PE=1 SV=1
325	A0A140N6A0	yiaD	3	3	9	13	9	5.19744e-05	7.78132e-05	5.50772e-05		1.49714	1.0597	0.734989	0.779818	0.88057		OmpA/MotB domain protein OS=Escherichia coli (strain B / BL21-DE3) OX=469008 GN=ECBD_0185 PE=4 SV=1
129	A0A140N8D3	yceA	6	4	9	13	10	3.25211e-05	4.86888e-05	3.82918e-05		1.49714	1.17744	0.0930352	0.828995	0.88057		UPF0176 protein YceA OS=Escherichia coli (strain B / BL21-DE3) OX=469008 GN=yceA PE=3 SV=1
326	A0A140N988	bioF	5	6	9	13	9	2.96417e-05	4.43778e-05	3.14112e-05		1.49714	1.0597	0.987709	0.779818	0.88057		8-amino-7-oxononanoate synthase OS=Escherichia coli (strain B / BL21-DE3) OX=469008 GN=bioF PE=3 SV=1
132	A0A140N6T7	rplS	15	11	801	1156	1178	0.00880899	0.0131769	0.0137284		1.49585	1.55846	0.896664	0.927854	0.880181		50S ribosomal protein L19 OS=Escherichia coli (strain B / BL21-DE3) OX=469008 GN=rplS PE=3 SV=1
133	A0A140N618	yggT	3	3	7	10	9	4.70903e-05	6.97262e-05	6.41591e-05		1.48069	1.36247	0.281548	0.886683	0.875533		Uncharacterized protein OS=Escherichia coli (strain B / BL21-DE3) OX=469008 GN=ECBD_0788 PE=4 SV=1
135	A0A140NA56	dedA	5	1	7	10	1	4.04246e-05	5.98563e-05	6.11969e-06		1.48069	0.151385	0.543376	0.0498937	0.875533		SNARE associated Golgi protein OS=Escherichia coli (strain B / BL21-DE3) OX=469008 GN=ECBD_1342 PE=4 SV=1
534	A0A140N6I9	surE	6	4	7	10	6	3.4992e-05	5.18124e-05	3.17837e-05		1.48069	0.908313	0.543376	0.69912	0.875533		5'/3'-nucleotidase SurE OS=Escherichia coli (strain B / BL21-DE3) OX=469008 GN=surE PE=3 SV=1
92	A0A140N7M5	ackA	17	17	355	505	561	0.00112243	0.00165495	0.00187965		1.47443	1.67462	0.939104	0.945141	0.873569		Acetate kinase OS=Escherichia coli (strain B / BL21-DE3) OX=469008 GN=ackA PE=3 SV=1
689	A0A140NDK1	gcd	23	20	76	108	56	0.000120751	0.000177854	9.42863e-05		1.4729	0.78083	0.761914	0.613868	0.873082		Membrane-bound PQQ-dependent dehydrogenase, glucose/quinate/shikimate family OS=Escherichia coli (strain B / BL21-DE3) OX=469008 GN=ECBD_3495 PE=4 SV=1
410	A0A140N4F1	rfaF	8	3	12	17	11	4.36107e-05	6.40359e-05	4.2363e-05		1.46835	0.97139	0.776522	0.735321	0.871634		Lipopolysaccharide heptosyltransferase II OS=Escherichia coli (strain B / BL21-DE3) OX=469008 GN=ECBD_0106 PE=4 SV=1
327	A0A140NEC9	metA	6	3	5	7	5	2.04646e-05	2.96957e-05	2.16863e-05		1.45108	1.0597	0.825202	0.779818	0.865997		Homoserine O-succinyltransferase OS=Escherichia coli (strain B / BL21-DE3) OX=469008 GN=metAS PE=3 SV=1
270	A0A140NC65	prfC	22	19	131	182	143	0.000313189	0.000450993	0.000362288		1.44	1.15677	0.848762	0.821135	0.862271		Peptide chain release factor 3 OS=Escherichia coli (strain B / BL21-DE3) OX=469008 GN=prfC PE=3 SV=1
85	A0A140N7J2	lpp	5	4	26	36	44	0.00042157	0.000605009	0.000756017		1.43513	1.79334	0.924398	0.958709	0.860605		LPP repeat-containing protein OS=Escherichia coli (strain B / BL21-DE3) OX=469008 GN=ECBD_1968 PE=4 SV=1
304	A0A140NDD0	tmk	8	7	21	29	22	0.00012469	0.000178473	0.000138426		1.43133	1.11016	0.734989	0.802233	0.859294		Thymidylate kinase OS=Escherichia coli (strain B / BL21-DE3) OX=469008 GN=tmk PE=3 SV=1
549	A0A140ND50	rlmL	25	20	79	109	67	0.000142325	0.000203537	0.000127912		1.43008	0.898731	0.767075	0.693283	0.85886		Ribosomal RNA large subunit methyltransferase K/L OS=Escherichia coli (strain B / BL21-DE3) OX=469008 GN=rlmL PE=3 SV=1
672	A0A140N544	tyrA	5	3	8	11	6	2.71252e-05	3.86579e-05	2.15584e-05		1.42516	0.794774	0.880659	0.624003	0.857141		T-protein OS=Escherichia coli (strain B / BL21-DE3) OX=469008 GN=ECBD_1086 PE=4 SV=1
760	A0A140N8I2	yciT	11	8	38	52	26	0.000193008	0.000273752	0.000139942		1.41835	0.725057	0.734989	0.571324	0.854728		Transcriptional regulator, DeoR family OS=Escherichia coli (strain B / BL21-DE3) OX=469008 GN=ECBD_2335 PE=4 SV=1
292	A0A140N969	aroH	10	9	30	41	32	0.000109027	0.00015444	0.000123238		1.41653	1.13034	0.697303	0.810624	0.854079		Phospho-2-dehydro-3-deoxyheptonate aldolase OS=Escherichia coli (strain B / BL21-DE3) OX=469008 GN=ECBD_1941 PE=3 SV=1
710	A0A140NE26	hsdM	31	20	168	229	122	0.000401647	0.000567458	0.000309085		1.41283	0.769543	0.533676	0.605517	0.85275		Site-specific DNA-methyltransferase (Adenine-specific) OS=Escherichia coli (strain B / BL21-DE3) OX=469008 GN=ECBD_3681 PE=4 SV=1
1054	A0A140NCR7	recR	5	2	14	19	7	8.80893e-05	0.000123911	4.66741e-05		1.40666	0.529849	0.483246	0.398904	0.850511		Recombination protein RecR OS=Escherichia coli (strain B / BL21-DE3) OX=469008 GN=recR PE=3 SV=1
530	A0A140N5Y7	rbfA	10	11	93	126	80	0.000884347	0.00124186	0.000806143		1.40427	0.911568	0.636571	0.701083	0.849637		Ribosome-binding factor A OS=Escherichia coli (strain B / BL21-DE3) OX=469008 GN=rbfA PE=3 SV=1
130	A0A140NGG7	rpsF	16	14	764	1031	1129	0.00737587	0.0103167	0.0115504		1.39871	1.56597	0.832499	0.929111	0.847585		30S ribosomal protein S6 OS=Escherichia coli (strain B / BL21-DE3) OX=469008 GN=rpsF PE=3 SV=1
284	A0A140N929	kdgR	17	15	66	89	71	0.00031738	0.000443596	0.000361806		1.39768	1.13998	0.786835	0.814518	0.847203		Transcriptional regulator, IclR family OS=Escherichia coli (strain B / BL21-DE3) OX=469008 GN=ECBD_1813 PE=4 SV=1
137	A0A140NFF4	tgt	23	19	178	239	257	0.000600316	0.00083545	0.000918492		1.39168	1.53001	0.941959	0.922901	0.844957		Queuine tRNA-ribosyltransferase OS=Escherichia coli (strain B / BL21-DE3) OX=469008 GN=tgt PE=3 SV=1
371	A0A140N893	ldhA	11	9	48	64	46	0.000184517	0.000254999	0.000187385		1.38198	1.01554	0.795113	0.758439	0.841264		D-isomer specific 2-hydroxyacid dehydrogenase NAD-binding OS=Escherichia coli (strain B / BL21-DE3) OX=469008 GN=ECBD_2243 PE=1 SV=1
157	A0A140NGM2	ecnB	2	1	3	4	4	7.90445e-05	0.000109238	0.000111684		1.38198	1.41293	0.987709	0.898978	0.841264		Entericidin EcnAB OS=Escherichia coli (strain B / BL21-DE3) OX=469008 GN=ECBD_3882 PE=4 SV=1
125	A0A140NBE8	rsxC	20	19	39	52	58	6.96663e-05	9.62773e-05	0.000109791		1.38198	1.57596	0.720979	0.930752	0.841264		Ion-translocating oxidoreductase complex subunit C OS=Escherichia coli (strain B / BL21-DE3) OX=469008 GN=rsxC PE=3 SV=1
136	A0A140N339	rsmD	5	4	9	12	13	5.74869e-05	7.94456e-05	8.79937e-05		1.38198	1.53068	0.592822	0.92302	0.841264		Ribosomal RNA small subunit methyltransferase D OS=Escherichia coli (strain B / BL21-DE3) OX=469008 GN=ECBD_0276 PE=3 SV=1
154	A0A140NB70	pqiB	11	12	21	28	28	4.86427e-05	6.72232e-05	6.87288e-05		1.38198	1.41293	0.869138	0.898978	0.841264		Mammalian cell entry related domain protein OS=Escherichia coli (strain B / BL21-DE3) OX=469008 GN=ECBD_2644 PE=4 SV=1
165	A0A140NDU6	yaeB	5	2	6	8	2	3.22905e-05	4.46248e-05	1.14061e-05		1.38198	0.353233	0.189637	0.223524	0.841264		TsaA-like domain-containing protein OS=Escherichia coli (strain B / BL21-DE3) OX=469008 GN=ECBD_3423 PE=4 SV=1
218	A0A140N412	csdL	5	3	6	8	7	2.83144e-05	3.91299e-05	3.50055e-05		1.38198	1.23631	0.632857	0.849717	0.841264		UBA/THIF-type NAD/FAD binding protein OS=Escherichia coli (strain B / BL21-DE3) OX=469008 GN=ECBD_0910 PE=4 SV=1
159	A0A140N762	argR	2	2	3	4	3	2.43214e-05	3.36116e-05	2.57733e-05		1.38198	1.0597	0.972162	0.779818	0.841264		Arginine repressor OS=Escherichia coli (strain B / BL21-DE3) OX=469008 GN=argR PE=3 SV=1
161	A0A140N8H5	yodB	1	1	3	4	3	2.24505e-05	3.10261e-05	2.37907e-05		1.38198	1.0597	0.734989	0.779818	0.841264		Cytochrome B561 OS=Escherichia coli (strain B / BL21-DE3) OX=469008 GN=ECBD_1673 PE=4 SV=1
163	A0A140N3X8	tdcB	2	2	3	4	2	1.15323e-05	1.59374e-05	8.14719e-06		1.38198	0.706465	0.503795	0.556436	0.841264		L-threonine dehydratase catabolic TdcB OS=Escherichia coli (strain B / BL21-DE3) OX=469008 GN=ECBD_0623 PE=3 SV=1
164	A0A140N6Y0	malY	4	2	3	4	2	9.72855e-06	1.34446e-05	6.87288e-06		1.38198	0.706465	0.503795	0.556436	0.841264		Aminotransferase class I and II OS=Escherichia coli (strain B / BL21-DE3) OX=469008 GN=ECBD_2023 PE=4 SV=1
153	A0A140N9W8	ydhQ	3	2	3	4	7	9.07688e-06	1.2544e-05	2.24437e-05		1.38198	2.47263	0.734989	0.992368	0.841264		Pertactin domain-containing protein OS=Escherichia coli (strain B / BL21-DE3) OX=469008 GN=ECBD_1979 PE=4 SV=1
160	A0A140N9X2	yejM	4	2	3	4	3	6.47463e-06	8.9478e-06	6.86115e-06		1.38198	1.0597	0.189637	0.779818	0.841264		Sulfatase OS=Escherichia coli (strain B / BL21-DE3) OX=469008 GN=ECBD_1469 PE=4 SV=1
616	A0A140NFA7	metN	9	6	19	25	15	7.00569e-05	9.55432e-05	5.86099e-05		1.36379	0.836604	0.601503	0.653205	0.834143		Methionine import ATP-binding protein MetN OS=Escherichia coli (strain B / BL21-DE3) OX=469008 GN=metN PE=3 SV=1
608	A0A140SS71	rpmE	9	7	70	92	56	0.00126471	0.00172283	0.00107217		1.36224	0.847759	0.859204	0.660688	0.833521		50S ribosomal protein L31 OS=Escherichia coli (strain B / BL21-DE3) OX=469008 GN=rpmE PE=3 SV=1
138	A0A140N993	wrbA	8	7	16	21	23	0.000102199	0.00013903	0.000155681		1.36038	1.52332	0.843025	0.92169	0.832779		NAD(P)H dehydrogenase (quinone) OS=Escherichia coli (strain B / BL21-DE3) OX=469008 GN=ECBD_2590 PE=3 SV=1
171	A0A140N2T1	rplF	17	16	956	1250	1233	0.00683087	0.00925743	0.00933605		1.35523	1.36674	0.924664	0.887775	0.830699		50S ribosomal protein L6 OS=Escherichia coli (strain B / BL21-DE3) OX=469008 GN=rplF PE=3 SV=1
260	A0A140N846	rplY	13	12	682	888	751	0.00917588	0.0123834	0.0107074		1.34956	1.16691	0.728654	0.82503	0.828382		50S ribosomal protein L25 OS=Escherichia coli (strain B / BL21-DE3) OX=469008 GN=rplY PE=3 SV=1
383	A0A140NCV1	pyrH	13	14	73	95	69	0.000383087	0.000516726	0.000383712		1.34885	1.00163	0.841858	0.751347	0.828091		Uridylate kinase OS=Escherichia coli (strain B / BL21-DE3) OX=469008 GN=pyrH PE=3 SV=1
172	A0A140NAT1	lpxB	8	2	10	13	2	3.31076e-05	4.46102e-05	7.01682e-06		1.34743	0.21194	0.0763837	0.0938202	0.827506		Lipid-A-disaccharide synthase OS=Escherichia coli (strain B / BL21-DE3) OX=469008 GN=lpxB PE=3 SV=1
768	A0A140NBQ1	rhlE	13	13	34	44	23	9.47141e-05	0.000127043	6.78962e-05		1.34133	0.716855	0.8044	0.564799	0.824978		ATP-dependent RNA helicase RhlE OS=Escherichia coli (strain B / BL21-DE3) OX=469008 GN=rhlE PE=3 SV=1
98	A0A140N5K8	rplD	20	18	707	913	1094	0.00444851	0.00595427	0.00729449		1.33849	1.63976	0.887546	0.940414	0.823787		50S ribosomal protein L4 OS=Escherichia coli (strain B / BL21-DE3) OX=469008 GN=rplD PE=3 SV=1
809	A0A140N9E7	hrpA	31	20	52	67	34	5.05885e-05	6.75593e-05	3.50517e-05		1.33547	0.69288	0.691138	0.545337	0.822517		ATP-dependent helicase HrpA OS=Escherichia coli (strain B / BL21-DE3) OX=469008 GN=ECBD_2227 PE=4 SV=1
237	A0A140NC35	thrA	39	35	206	265	234	0.00031772	0.000423629	0.000382451		1.33334	1.20373	0.830217	0.838546	0.821616		Bifunctional aspartokinase/homoserine dehydrogenase OS=Escherichia coli (strain B / BL21-DE3) OX=469008 GN=ECBD_3616 PE=3 SV=1
185	A0A140NAN4	cld	17	13	70	90	86	0.000271564	0.000361892	0.000353553		1.33262	1.30191	0.825202	0.870121	0.821311		Lipopolysaccharide biosynthesis protein OS=Escherichia coli (strain B / BL21-DE3) OX=469008 GN=ECBD_1632 PE=4 SV=1
1062	A0A140NAT6	edd	9	4	14	18	7	2.93631e-05	3.91299e-05	1.5558e-05		1.33262	0.529849	0.894109	0.398904	0.821311		Phosphogluconate dehydratase OS=Escherichia coli (strain B / BL21-DE3) OX=469008 GN=edd PE=3 SV=1
179	A0A140N9I4	lpxK	5	3	7	9	3	2.69908e-05	3.59685e-05	1.2258e-05		1.33262	0.454156	0.894109	0.324504	0.821311		Tetraacyldisaccharide 4'-kinase OS=Escherichia coli (strain B / BL21-DE3) OX=469008 GN=lpxK PE=3 SV=1
1035	A0A140N5M2	truB	15	9	42	54	22	0.000169165	0.000225433	9.39002e-05		1.33262	0.55508	0.812345	0.422989	0.821311		tRNA pseudouridine synthase B OS=Escherichia coli (strain B / BL21-DE3) OX=469008 GN=truB PE=3 SV=1
88	A0A140N6W8	rpsG	26	23	995	1275	1648	0.00806659	0.0107137	0.0141581		1.32816	1.75516	0.894483	0.954739	0.819407		30S ribosomal protein S7 OS=Escherichia coli (strain B / BL21-DE3) OX=469008 GN=rpsG PE=3 SV=1
887	A0A140N472	pcm	9	6	18	23	11	0.000109446	0.00014495	7.08766e-05		1.3244	0.647593	0.503795	0.507028	0.81779		Protein-L-isoaspartate O-methyltransferase OS=Escherichia coli (strain B / BL21-DE3) OX=469008 GN=pcm PE=3 SV=1
979	A0A140NH83	cdh	9	3	18	23	10	9.06964e-05	0.000120118	5.33949e-05		1.3244	0.588721	0.549768	0.454378	0.81779		CDP-diacylglycerol pyrophosphatase OS=Escherichia coli (strain B / BL21-DE3) OX=469008 GN=cdh PE=3 SV=1
206	A0A140N711	rplO	14	14	1091	1393	1296	0.00958194	0.0126807	0.0120619		1.32339	1.25882	0.850115	0.857022	0.817357		50S ribosomal protein L15 OS=Escherichia coli (strain B / BL21-DE3) OX=469008 GN=rplO PE=3 SV=1
178	A0A140NEX9	dnaB	16	13	40	51	50	0.000107406	0.000141939	0.000142273		1.32152	1.32462	0.825202	0.876575	0.816544		Replicative DNA helicase OS=Escherichia coli (strain B / BL21-DE3) OX=469008 GN=ECBD_3981 PE=3 SV=1
1012	A0A140N7C5	greA	12	10	187	238	101	0.00149684	0.00197458	0.000856718		1.31916	0.57235	0.348557	0.439213	0.815519		Transcription elongation factor GreA OS=Escherichia coli (strain B / BL21-DE3) OX=469008 GN=greA PE=3 SV=1
323	A0A140NAX3	ndh	24	19	153	194	154	0.000445854	0.000585957	0.000475559		1.31423	1.06662	0.774242	0.783019	0.813361		FAD-dependent pyridine nucleotide-disulphide oxidoreductase OS=Escherichia coli (strain B / BL21-DE3) OX=469008 GN=ECBD_2492 PE=4 SV=1
712	A0A140NGD3	pstS	30	26	188	238	136	0.000687184	0.000901685	0.000526789		1.31214	0.76659	0.483909	0.60331	0.812439		Phosphate-binding protein PstS OS=Escherichia coli (strain B / BL21-DE3) OX=469008 GN=ECBD_4304 PE=3 SV=1
690	A0A140NI35	corA	5	4	19	24	14	7.60428e-05	9.95584e-05	5.93765e-05		1.30924	0.78083	0.518618	0.613868	0.811152		Magnesium transport protein CorA OS=Escherichia coli (strain B / BL21-DE3) OX=469008 GN=corA PE=3 SV=1
223	A0A140N5C1	rsmB	8	7	19	24	22	5.60129e-05	7.33344e-05	6.87288e-05		1.30924	1.22702	0.847437	0.846603	0.811152		Ribosomal RNA small subunit methyltransferase B OS=Escherichia coli (strain B / BL21-DE3) OX=469008 GN=rsmB PE=3 SV=1
382	A0A140NAE5	yeeF	7	6	38	48	36	0.000106325	0.000139206	0.000106743		1.30924	1.00392	0.855929	0.752528	0.811152		Amino acid permease-associated region OS=Escherichia coli (strain B / BL21-DE3) OX=469008 GN=ECBD_1643 PE=4 SV=1
174	A0A140NCI3	pspA	12	10	65	82	83	0.000370298	0.000484189	0.00050107		1.30756	1.35315	0.709337	0.884268	0.810405		Phage shock protein A, PspA OS=Escherichia coli (strain B / BL21-DE3) OX=469008 GN=ECBD_2313 PE=4 SV=1
861	A0A140N4W8	ugpB	24	18	72	90	45	0.000207898	0.000269353	0.000137693		1.2956	0.662311	0.503795	0.519695	0.805009		Extracellular solute-binding protein family 1 OS=Escherichia coli (strain B / BL21-DE3) OX=469008 GN=ECBD_0288 PE=4 SV=1
641	A0A140NFV1	pstB	12	9	40	50	31	0.000196842	0.00025503	0.00016166		1.2956	0.821266	0.30251	0.642706	0.805009		Phosphate import ATP-binding protein PstB OS=Escherichia coli (strain B / BL21-DE3) OX=469008 GN=pstB PE=3 SV=1
362	A0A140NFW3	thrB	8	8	28	35	27	0.000114232	0.000147999	0.000116728		1.2956	1.02185	0.694453	0.761598	0.805009		Homoserine kinase OS=Escherichia coli (strain B / BL21-DE3) OX=469008 GN=thrB PE=3 SV=1
148	A0A140NF49	frmR	4	3	8	10	11	0.000111183	0.00014405	0.000162004		1.2956	1.45708	0.843025	0.908712	0.805009		Uncharacterized protein OS=Escherichia coli (strain B / BL21-DE3) OX=469008 GN=ECBD_3300 PE=4 SV=1
208	A0A140NF03	iclR	5	4	16	20	19	7.38518e-05	9.56827e-05	9.29344e-05		1.2956	1.25839	0.766695	0.856887	0.805009		Transcriptional regulator, IclR family OS=Escherichia coli (strain B / BL21-DE3) OX=469008 GN=ECBD_4019 PE=4 SV=1
195	A0A140N4U3	ftsB	2	2	4	5	5	4.9115e-05	6.36336e-05	6.50588e-05		1.2956	1.32462	0.571668	0.876575	0.805009		Cell division protein FtsB OS=Escherichia coli (strain B / BL21-DE3) OX=469008 GN=ftsB PE=3 SV=1
202	A0A140NF64	codA	4	1	8	10	1	2.36948e-05	3.06991e-05	3.13867e-06		1.2956	0.132462	0.571668	0.0384573	0.805009		Cytosine deaminase OS=Escherichia coli (strain B / BL21-DE3) OX=469008 GN=ECBD_3320 PE=4 SV=1
200	A0A140NGM4	ulaR	3	2	4	5	2	2.01548e-05	2.61126e-05	1.0679e-05		1.2956	0.529849	0.351139	0.398904	0.805009		HTH-type transcriptional regulator UlaR OS=Escherichia coli (strain B / BL21-DE3) OX=469008 GN=ulaR PE=3 SV=1
193	A0A140N6H0	mutM	3	2	4	5	8	1.88061e-05	2.43653e-05	3.98576e-05		1.2956	2.1194	0.949453	0.981423	0.805009		Formamidopyrimidine-DNA glycosylase OS=Escherichia coli (strain B / BL21-DE3) OX=469008 GN=mutM PE=3 SV=1
201	A0A140N5N8	ypdF	2	1	4	5	1	1.40134e-05	1.81559e-05	3.7125e-06		1.2956	0.264925	0.984891	0.139251	0.805009		Peptidase M24 OS=Escherichia coli (strain B / BL21-DE3) OX=469008 GN=ECBD_1287 PE=4 SV=1
617	A0A140NBC1	purR	19	15	90	112	71	0.000333795	0.000430544	0.000279047		1.28985	0.835984	0.662699	0.652785	0.802366		HTH-type transcriptional repressor PurR OS=Escherichia coli (strain B / BL21-DE3) OX=469008 GN=purR PE=3 SV=1
666	A0A140N5X9	rlmE	8	7	33	41	25	0.000199691	0.000257153	0.000160312		1.28775	0.802802	0.600327	0.629747	0.801398		Ribosomal RNA large subunit methyltransferase E OS=Escherichia coli (strain B / BL21-DE3) OX=469008 GN=rlmE PE=3 SV=1
427	A0A140NC11	pal	6	7	21	26	19	0.00015352	0.000197007	0.000147191		1.28327	0.958775	0.734989	0.728385	0.79931		Peptidoglycan-associated protein OS=Escherichia coli (strain B / BL21-DE3) OX=469008 GN=pal PE=3 SV=1
173	A0A140N7D8	rpsP	9	6	444	549	571	0.00684795	0.00877632	0.00933245		1.2816	1.36281	0.876105	0.88677	0.79853		30S ribosomal protein S16 OS=Escherichia coli (strain B / BL21-DE3) OX=469008 GN=rpsP PE=3 SV=1
656	A0A140N8B9	ybl99	10	8	55	68	42	0.000384305	0.000492475	0.000310988		1.28147	0.809224	0.725116	0.634294	0.79847		dTDP-4-dehydrorhamnose 3,5-epimerase OS=Escherichia coli (strain B / BL21-DE3) OX=469008 GN=ECBD_1617 PE=3 SV=1
183	A0A140N4R8	hyfG	1	1	17	21	21	3.87389e-05	4.95998e-05	5.07107e-05		1.28036	1.30904	0.81621	0.872178	0.797949		NADH dehydrogenase (Ubiquinone) 30 kDa subunit OS=Escherichia coli (strain B / BL21-DE3) OX=469008 GN=ECBD_1201 PE=4 SV=1
139	A0A140N7C7	fusA	56	50	3454	4263	4923	0.00620499	0.00793773	0.00937197		1.27925	1.51039	0.891937	0.919301	0.797426		Elongation factor G OS=Escherichia coli (strain B / BL21-DE3) OX=469008 GN=fusA PE=3 SV=1
312	A0A140NDB6	rplJ	19	13	556	686	571	0.00426169	0.00544997	0.00463795		1.27883	1.08829	0.860418	0.792774	0.797227		50S ribosomal protein L10 OS=Escherichia coli (strain B / BL21-DE3) OX=469008 GN=rplJ PE=3 SV=1
583	A0A140NBR2	ybiS	16	15	91	112	75	0.000376107	0.000479789	0.000328483		1.27567	0.873378	0.586393	0.677398	0.795736		ErfK/YbiS/YcfS/YnhG family protein OS=Escherichia coli (strain B / BL21-DE3) OX=469008 GN=ECBD_2804 PE=4 SV=1
253	A0A140NDQ1	gpt	4	3	36	44	40	0.000299537	0.000379457	0.000352687		1.26681	1.17744	0.823115	0.828995	0.7915		Xanthine phosphoribosyltransferase OS=Escherichia coli (strain B / BL21-DE3) OX=469008 GN=gpt PE=3 SV=1
213	A0A140SSA3	rffH	5	2	9	11	3	3.88478e-05	4.92129e-05	1.37223e-05		1.26681	0.353233	0.297078	0.223524	0.7915		Glucose-1-phosphate thymidylyltransferase OS=Escherichia coli (strain B / BL21-DE3) OX=469008 GN=ECBD_4250 PE=3 SV=1
456	A0A140N598	rplM	16	14	651	793	581	0.00579808	0.00732047	0.00548354		1.26257	0.945752	0.830189	0.721068	0.789446		50S ribosomal protein L13 OS=Escherichia coli (strain B / BL21-DE3) OX=469008 GN=rplM PE=3 SV=1
580	A0A140N704	znuA	5	4	23	28	19	9.2344e-05	0.00011652	8.08382e-05		1.26181	0.875403	0.330074	0.67869	0.789075		Periplasmic solute binding protein OS=Escherichia coli (strain B / BL21-DE3) OX=469008 GN=ECBD_1781 PE=3 SV=1
1097	A0A140NAU5	purT	10	5	23	28	11	7.4205e-05	9.36323e-05	3.7608e-05		1.26181	0.506812	0.528135	0.37656	0.789075		Formate-dependent phosphoribosylglycinamide formyltransferase OS=Escherichia coli (strain B / BL21-DE3) OX=469008 GN=purT PE=3 SV=1
627	A0A140N5N9	trkA	15	13	37	45	29	0.000102171	0.000128796	8.48606e-05		1.26059	0.830574	0.55576	0.649106	0.788482		TrkA-N domain protein OS=Escherichia coli (strain B / BL21-DE3) OX=469008 GN=ECBD_0462 PE=4 SV=1
187	A0A140N627	metK	24	23	386	467	473	0.0012713	0.00159419	0.00165083		1.25398	1.29854	0.825008	0.869137	0.785241		S-adenosylmethionine synthase OS=Escherichia coli (strain B / BL21-DE3) OX=469008 GN=metK PE=3 SV=1
141	A0A140N6W0	tufA	41	37	6321	7638	8929	0.02029	0.0254119	0.0303725		1.25244	1.49692	0.814817	0.916739	0.784477		Elongation factor Tu OS=Escherichia coli (strain B / BL21-DE3) OX=469008 GN=tuf PE=1 SV=1
142	A0A140NCI6	tufB	41	37	6321	7638	8929	0.02029	0.0254119	0.0303725		1.25244	1.49692	0.871041	0.916739	0.784477		Elongation factor Tu OS=Escherichia coli (strain B / BL21-DE3) OX=469008 GN=tuf PE=3 SV=1
170	A0A140NDN9	dps	16	13	110	132	142	0.000833043	0.00103612	0.00113958		1.24378	1.36797	0.838332	0.888088	0.780155		DNA protection during starvation protein OS=Escherichia coli (strain B / BL21-DE3) OX=469008 GN=dps PE=3 SV=1
483	A0A140NEZ7	tsx	10	7	40	48	35	0.00017207	0.000214017	0.000159549		1.24378	0.927236	0.795113	0.710383	0.780155		Nucleoside-specific channel-forming protein Tsx OS=Escherichia coli (strain B / BL21-DE3) OX=469008 GN=ECBD_3250 PE=4 SV=1
227	A0A140N469	ugpQ	4	1	15	18	2	7.68043e-05	9.55277e-05	1.08519e-05		1.24378	0.141293	0.129432	0.0436406	0.780155		Glycerophosphoryl diester phosphodiesterase OS=Escherichia coli (strain B / BL21-DE3) OX=469008 GN=ECBD_0292 PE=4 SV=1
226	A0A140NFY9	ispU	2	1	5	6	1	2.50935e-05	3.12108e-05	5.3183e-06		1.24378	0.21194	0.253638	0.0938202	0.780155		Ditrans,polycis-undecaprenyl-diphosphate synthase ((2E,6E)-farnesyl-diphosphate specific) OS=Escherichia coli (strain B / BL21-DE3) OX=469008 GN=uppS PE=3 SV=1
225	A0A140N8X7	rlmC	4	2	5	6	3	1.68628e-05	2.09736e-05	1.07217e-05		1.24378	0.635819	0.734989	0.496747	0.780155		23S rRNA (uracil(747)-C(5))-methyltransferase RlmC OS=Escherichia coli (strain B / BL21-DE3) OX=469008 GN=rlmC PE=3 SV=1
328	A0A140N806	gadB	1	1	5	6	5	1.35699e-05	1.68779e-05	1.438e-05		1.24378	1.0597	0.734989	0.779818	0.780155		Glutamate decarboxylase OS=Escherichia coli (strain B / BL21-DE3) OX=469008 GN=ECBD_2146 PE=3 SV=1
329	A0A140N3Z8	gadA	1	1	5	6	5	1.35699e-05	1.68779e-05	1.438e-05		1.24378	1.0597	0.734989	0.779818	0.780155		Glutamate decarboxylase OS=Escherichia coli (strain B / BL21-DE3) OX=469008 GN=ECBD_0222 PE=3 SV=1
737	A0A140NG09	thrC	26	21	183	219	129	0.000540753	0.00067074	0.000403942		1.24038	0.747	0.522221	0.588444	0.77844		Threonine synthase OS=Escherichia coli (strain B / BL21-DE3) OX=469008 GN=ECBD_3614 PE=4 SV=1
144	A0A140NDL0	aceE	89	82	2425	2901	3403	0.00345764	0.00428724	0.00514176		1.23993	1.48707	0.863772	0.914818	0.778213		Pyruvate dehydrogenase E1 component OS=Escherichia coli (strain B / BL21-DE3) OX=469008 GN=ECBD_3505 PE=4 SV=1
1356	A0A140NG17	rob	6	6	26	31	9	0.00011378	0.00014061	4.17367e-05		1.23581	0.366819	0.556585	0.237015	0.776114		Transcriptional regulator, AraC family OS=Escherichia coli (strain B / BL21-DE3) OX=469008 GN=ECBD_3624 PE=4 SV=1
466	A0A140NFC7	fabZ	8	6	136	162	120	0.00113908	0.00140635	0.00106507		1.23463	0.935028	0.761346	0.71492	0.775515		3-hydroxyacyl-[acyl-carrier-protein] dehydratase FabZ OS=Escherichia coli (strain B / BL21-DE3) OX=469008 GN=fabZ PE=3 SV=1
576	A0A140N9X7	ydcP	20	14	58	69	48	0.000112333	0.000138513	9.85148e-05		1.23306	0.876992	0.752902	0.679701	0.774707		Peptidase U32 OS=Escherichia coli (strain B / BL21-DE3) OX=469008 GN=ECBD_2204 PE=4 SV=1
758	A0A140N6E7	prfB	17	16	154	183	106	0.000533604	0.000657222	0.000389212		1.23167	0.729403	0.579171	0.574754	0.773992		Peptide chain release factor 2 OS=Escherichia coli (strain B / BL21-DE3) OX=469008 GN=prfB PE=3 SV=1
390	A0A140NFE1	tilS	7	6	16	19	15	4.68412e-05	5.76532e-05	4.65351e-05		1.23082	0.993467	0.6182	0.747103	0.773558		tRNA(Ile)-lysidine synthase OS=Escherichia coli (strain B / BL21-DE3) OX=469008 GN=tilS PE=3 SV=1
957	A0A140NE13	fur	8	6	60	71	34	0.000512721	0.000628855	0.000307887		1.22651	0.600496	0.5453	0.465151	0.771325		Ferric uptake regulation protein OS=Escherichia coli (strain B / BL21-DE3) OX=469008 GN=fur PE=3 SV=1
1046	A0A140NCP1	hha	5	3	33	39	17	0.000579659	0.000710045	0.000316439		1.22494	0.545905	0.45056	0.414281	0.770508		Hemolysin expression modulating family protein OS=Escherichia coli (strain B / BL21-DE3) OX=469008 GN=ECBD_3196 PE=4 SV=1
1063	A0A140NF70	rnpA	5	3	22	26	11	0.000257626	0.000315576	0.000136503		1.22494	0.529849	0.709741	0.398904	0.770508		Ribonuclease P protein component OS=Escherichia coli (strain B / BL21-DE3) OX=469008 GN=rnpA PE=3 SV=1
933	A0A140N8Y3	yeaZ	7	5	22	26	13	0.000120449	0.000147542	7.54232e-05		1.22494	0.626185	0.516613	0.48824	0.770508		Peptidase_M22 domain-containing protein OS=Escherichia coli (strain B / BL21-DE3) OX=469008 GN=ECBD_1835 PE=4 SV=1
389	A0A140NAZ2	rpmF	5	4	711	840	669	0.0157756	0.0193178	0.0157299		1.22454	0.9971	0.814295	0.748999	0.770301		50S ribosomal protein L32 OS=Escherichia coli (strain B / BL21-DE3) OX=469008 GN=rpmF PE=3 SV=1
169	A0A140N4B1	ybl161	8	7	17	20	22	6.19599e-05	7.55535e-05	8.49702e-05		1.21939	1.37137	0.626013	0.888948	0.767608		Uncharacterized protein OS=Escherichia coli (strain B / BL21-DE3) OX=469008 GN=ECBD_0065 PE=4 SV=1
822	A0A140N7Q2	mlaC	9	4	17	20	11	0.000101896	0.000124251	6.98689e-05		1.21939	0.685687	0.734989	0.539386	0.767608		Toluene tolerance family protein OS=Escherichia coli (strain B / BL21-DE3) OX=469008 GN=ECBD_0550 PE=4 SV=1
1353	A0A140N9J4	speG	4	4	23	27	8	0.000156389	0.000190285	5.76435e-05		1.21674	0.368591	0.563187	0.23878	0.76621		Diamine N-acetyltransferase OS=Escherichia coli (strain B / BL21-DE3) OX=469008 GN=ECBD_2062 PE=4 SV=1
813	A0A140N4B0	selA	14	8	23	27	15	6.28258e-05	7.64428e-05	4.34194e-05		1.21674	0.691107	0.563187	0.543875	0.76621		L-seryl-tRNA(Sec) selenium transferase OS=Escherichia coli (strain B / BL21-DE3) OX=469008 GN=selA PE=3 SV=1
128	A0A140NFK2	rpsB	26	25	1241	1455	1837	0.00651248	0.00791407	0.0102156		1.21522	1.56863	0.879937	0.929551	0.765403		30S ribosomal protein S2 OS=Escherichia coli (strain B / BL21-DE3) OX=469008 GN=rpsB PE=3 SV=1
301	A0A140N6D6	ybl103	6	5	18	21	19	0.000281047	0.000339851	0.000314371		1.20923	1.11857	0.669858	0.805768	0.762215		Uncharacterized protein OS=Escherichia coli (strain B / BL21-DE3) OX=469008 GN=ECBD_1552 PE=4 SV=1
862	A0A140NFT3	ribF	8	7	24	28	15	9.69747e-05	0.000117265	6.42274e-05		1.20923	0.662311	0.503795	0.519695	0.762215		Riboflavin biosynthesis protein OS=Escherichia coli (strain B / BL21-DE3) OX=469008 GN=ECBD_3591 PE=3 SV=1
457	A0A140NGF2	ytfL	10	7	18	21	16	5.0928e-05	6.15837e-05	4.79718e-05		1.20923	0.941954	0.763339	0.718903	0.762215		Uncharacterized protein OS=Escherichia coli (strain B / BL21-DE3) OX=469008 GN=ECBD_3812 PE=4 SV=1
250	A0A140NB40	ilvH	6	2	6	7	4	4.65538e-05	5.62943e-05	3.28886e-05		1.20923	0.706465	0.189637	0.556436	0.762215		Acetolactate synthase, small subunit OS=Escherichia coli (strain B / BL21-DE3) OX=469008 GN=ECBD_3538 PE=4 SV=1
330	A0A140N6X9	yhiQ	4	3	6	7	6	3.03531e-05	3.67039e-05	3.21651e-05		1.20923	1.0597	0.958492	0.779818	0.762215		Ribosomal RNA small subunit methyltransferase J OS=Escherichia coli (strain B / BL21-DE3) OX=469008 GN=rsmJ PE=3 SV=1
563	A0A140N3I2	ade	4	2	6	7	5	1.29052e-05	1.56054e-05	1.13964e-05		1.20923	0.883082	0.958492	0.683554	0.762215		Adenine deaminase OS=Escherichia coli (strain B / BL21-DE3) OX=469008 GN=ade PE=3 SV=1
219	A0A140NCB2	entF	4	4	6	7	7	5.86873e-06	7.09665e-06	7.2556e-06		1.20923	1.23631	0.734989	0.849717	0.762215		Amino acid adenylation domain protein OS=Escherichia coli (strain B / BL21-DE3) OX=469008 GN=ECBD_3069 PE=4 SV=1
313	A0A140NCD6	ttcA	14	11	49	57	50	0.000199263	0.000240253	0.000215468		1.20571	1.08132	0.80266	0.789681	0.760321		tRNA-cytidine(32) 2-sulfurtransferase OS=Escherichia coli (strain B / BL21-DE3) OX=469008 GN=ttcA PE=3 SV=1
353	A0A140NA72	yegQ	15	10	49	57	48	0.000136801	0.000164942	0.000142009		1.20571	1.03807	0.700535	0.769559	0.760321		Peptidase U32 OS=Escherichia coli (strain B / BL21-DE3) OX=469008 GN=ECBD_1572 PE=4 SV=1
295	A0A140N7E6	thrS	41	37	467	543	497	0.000919969	0.00110871	0.00103752		1.20516	1.12777	0.668335	0.809573	0.760028		Threonine--tRNA ligase OS=Escherichia coli (strain B / BL21-DE3) OX=469008 GN=thrS PE=3 SV=1
248	A0A140NB65	bioB	14	15	68	79	76	0.000248556	0.000299299	0.000294382		1.20415	1.18437	0.886376	0.831559	0.759482		Biotin synthase OS=Escherichia coli (strain B / BL21-DE3) OX=469008 GN=bioB PE=3 SV=1
256	A0A140NEM4	sodA	9	5	25	29	6	0.000153484	0.000184537	3.90353e-05		1.20232	0.254328	0.0119482	0.12976	0.758492		Superoxide dismutase OS=Escherichia coli (strain B / BL21-DE3) OX=469008 GN=ECBD_4115 PE=3 SV=1
258	A0A140N652	ygfB	2	2	13	15	3	8.47487e-05	0.000101355	2.07249e-05		1.19594	0.244546	0.0459415	0.121163	0.755014		UPF0149 protein YgfB OS=Escherichia coli (strain B / BL21-DE3) OX=469008 GN=ygfB PE=3 SV=1
652	A0A140NDU0	cycA	3	3	13	15	10	3.49814e-05	4.18357e-05	2.85152e-05		1.19594	0.815152	0.836371	0.638454	0.755014		Amino acid permease-associated region OS=Escherichia coli (strain B / BL21-DE3) OX=469008 GN=ECBD_3821 PE=4 SV=1
648	A0A140NFF5	mrcB	23	18	66	76	51	9.9252e-05	0.00011846	8.12733e-05		1.19353	0.818858	0.718367	0.641036	0.753687		Penicillin-binding protein 1B OS=Escherichia coli (strain B / BL21-DE3) OX=469008 GN=ECBD_3470 PE=3 SV=1
360	A0A140N5I1	folE	9	8	60	69	58	0.000341814	0.000407427	0.000350146		1.19196	1.02437	0.891246	0.762852	0.752821		GTP cyclohydrolase 1 OS=Escherichia coli (strain B / BL21-DE3) OX=469008 GN=folE PE=3 SV=1
533	A0A140N7I9	purL	48	37	211	242	181	0.000206065	0.000244962	0.000187319		1.18876	0.90903	0.749837	0.699554	0.751054		Phosphoribosylformylglycinamidine synthase OS=Escherichia coli (strain B / BL21-DE3) OX=469008 GN=purL PE=3 SV=1
131	A0A140N340	rpmA	6	4	382	437	562	0.00568376	0.00673932	0.00886117		1.18572	1.55903	0.84698	0.927951	0.749357		50S ribosomal protein L27 OS=Escherichia coli (strain B / BL21-DE3) OX=469008 GN=rpmA PE=3 SV=1
146	A0A140NDE1	yceD	5	5	28	32	39	0.000204693	0.00024247	0.000302129		1.18455	1.47601	0.770951	0.912611	0.748708		Uncharacterized protein OS=Escherichia coli (strain B / BL21-DE3) OX=469008 GN=ECBD_2513 PE=4 SV=1
275	A0A140NDR3	folA	5	1	21	24	4	0.000135505	0.000160513	2.73513e-05		1.18455	0.201847	0.0396405	0.0858226	0.748708		Dihydrofolate reductase OS=Escherichia coli (strain B / BL21-DE3) OX=469008 GN=ECBD_3567 PE=3 SV=1
830	A0A140NFC3	yagU	4	2	14	16	9	8.67939e-05	0.000102812	5.9127e-05		1.18455	0.681235	0.770951	0.535677	0.748708		Uncharacterized protein OS=Escherichia coli (strain B / BL21-DE3) OX=469008 GN=ECBD_3370 PE=4 SV=1
331	A0A140NDM4	ybjQ	2	2	7	8	7	8.27381e-05	9.80077e-05	8.76774e-05		1.18455	1.0597	0.649085	0.779818	0.748708		UPF0145 protein YbjQ OS=Escherichia coli (strain B / BL21-DE3) OX=469008 GN=ybjQ PE=3 SV=1
272	A0A140NF33	nsrR	4	3	7	8	4	6.27871e-05	7.43746e-05	3.80202e-05		1.18455	0.605542	0.543376	0.469731	0.748708		HTH-type transcriptional repressor NsrR OS=Escherichia coli (strain B / BL21-DE3) OX=469008 GN=nsrR PE=3 SV=1
269	A0A140NFG0	rnhA	4	3	7	8	5	5.7116e-05	6.76569e-05	4.32327e-05		1.18455	0.756927	0.0396405	0.596027	0.748708		Ribonuclease H OS=Escherichia coli (strain B / BL21-DE3) OX=469008 GN=rnhA PE=3 SV=1
274	A0A140N8Z8	lpxM	7	3	14	16	3	5.48172e-05	6.49339e-05	1.24478e-05		1.18455	0.227078	0.281548	0.106246	0.748708		Lipid A biosynthesis myristoyltransferase OS=Escherichia coli (strain B / BL21-DE3) OX=469008 GN=lpxM PE=3 SV=1
233	A0A140NDH7	glpX	8	6	14	16	16	4.67176e-05	5.53394e-05	5.65789e-05		1.18455	1.21108	0.418858	0.841129	0.748708		Fructose-1,6-bisphosphatase OS=Escherichia coli (strain B / BL21-DE3) OX=469008 GN=ECBD_4099 PE=3 SV=1
951	A0A140N6V2	lysA	6	3	14	16	8	4.2157e-05	4.99372e-05	2.55279e-05		1.18455	0.605542	0.770951	0.469731	0.748708		Diaminopimelate decarboxylase OS=Escherichia coli (strain B / BL21-DE3) OX=469008 GN=lysA PE=3 SV=1
1064	A0A140NB71	phoQ	4	4	14	16	7	3.6432e-05	4.31556e-05	1.93035e-05		1.18455	0.529849	0.483246	0.398904	0.748708		Histidine kinase OS=Escherichia coli (strain B / BL21-DE3) OX=469008 GN=ECBD_2470 PE=4 SV=1
268	A0A140NAC0	mak	5	4	7	8	5	2.93145e-05	3.47246e-05	2.21889e-05		1.18455	0.756927	0.418858	0.596027	0.748708		ROK family protein OS=Escherichia coli (strain B / BL21-DE3) OX=469008 GN=ECBD_3267 PE=4 SV=1
277	A0A140N6W2	anmK	5	1	7	8	1	2.39918e-05	2.84196e-05	3.63201e-06		1.18455	0.151385	0.0396405	0.0498937	0.748708		Anhydro-N-acetylmuramic acid kinase OS=Escherichia coli (strain B / BL21-DE3) OX=469008 GN=anmK PE=3 SV=1
276	A0A140N655	proV	6	1	7	8	1	2.21324e-05	2.62171e-05	3.35053e-06		1.18455	0.151385	0.0396405	0.0498937	0.748708		Glycine betaine/L-proline ABC transporter, ATPase subunit OS=Escherichia coli (strain B / BL21-DE3) OX=469008 GN=ECBD_1042 PE=4 SV=1
93	A0A140N7B3	gabT	5	5	7	8	11	2.07816e-05	2.46169e-05	3.46064e-05		1.18455	1.66524	0.945033	0.943905	0.748708		4-aminobutyrate aminotransferase OS=Escherichia coli (strain B / BL21-DE3) OX=469008 GN=ECBD_1057 PE=3 SV=1
332	A0A140NFM5	yifK	4	2	7	8	7	1.92039e-05	2.2748e-05	2.03503e-05		1.18455	1.0597	0.543376	0.779818	0.748708		Amino acid permease-associated region OS=Escherichia coli (strain B / BL21-DE3) OX=469008 GN=ECBD_4243 PE=4 SV=1
299	A0A140NBL4	bamA	47	43	298	339	316	0.000465289	0.000548616	0.000522848		1.17909	1.12371	0.776781	0.8079	0.745637		Outer membrane protein assembly factor BamA OS=Escherichia coli (strain B / BL21-DE3) OX=469008 GN=bamA PE=3 SV=1
145	A0A140NET2	tig	52	49	1730	1968	2412	0.0050647	0.00597166	0.00748285		1.17907	1.47745	0.848721	0.912902	0.74563		Trigger factor OS=Escherichia coli (strain B / BL21-DE3) OX=469008 GN=tig PE=3 SV=1
149	A0A140N6K5	dut	3	3	22	25	30	0.00018305	0.000215601	0.000264516		1.17782	1.44504	0.877613	0.906147	0.744922		Deoxyuridine 5'-triphosphate nucleotidohydrolase OS=Escherichia coli (strain B / BL21-DE3) OX=469008 GN=dut PE=3 SV=1
525	A0A140SS65	murI	8	6	22	25	19	9.76268e-05	0.000114987	8.93475e-05		1.17782	0.915194	0.589032	0.703256	0.744922		Glutamate racemase OS=Escherichia coli (strain B / BL21-DE3) OX=469008 GN=murI PE=3 SV=1
251	A0A140N7D6	nusA	42	33	478	543	533	0.00122128	0.00143797	0.0014431		1.17743	1.18163	0.782428	0.830549	0.744699		Transcription termination/antitermination protein NusA OS=Escherichia coli (strain B / BL21-DE3) OX=469008 GN=nusA PE=3 SV=1
1366	A0A140NDG6	yaiL	7	2	15	17	5	0.000105981	0.000124494	3.74361e-05		1.17468	0.353233	0.609201	0.223524	0.743141		Uncharacterized protein OS=Escherichia coli (strain B / BL21-DE3) OX=469008 GN=ECBD_3303 PE=4 SV=1
790	A0A140NCV0	hemG	6	6	15	17	10	0.00010481	0.000123119	7.40449e-05		1.17468	0.706465	0.697303	0.556436	0.743141		Protoporphyrinogen oxidase OS=Escherichia coli (strain B / BL21-DE3) OX=469008 GN=ECBD_4175 PE=4 SV=1
333	A0A140NFJ1	lpxD	7	3	15	17	15	5.56325e-05	6.53504e-05	5.89536e-05		1.17468	1.0597	0.848595	0.779818	0.743141		UDP-3-O-(3-hydroxymyristoyl)glucosamine N-acyltransferase OS=Escherichia coli (strain B / BL21-DE3) OX=469008 GN=lpxD PE=3 SV=1
544	A0A140NCX5	topA	42	30	144	163	123	0.000210542	0.000247016	0.000190574		1.17324	0.905159	0.61322	0.697209	0.742321		DNA topoisomerase 1 OS=Escherichia coli (strain B / BL21-DE3) OX=469008 GN=topA PE=3 SV=1
507	A0A140N5F4	pnp	44	39	734	830	638	0.00130562	0.00153025	0.00120261		1.17205	0.9211	0.691519	0.70677	0.741638		Polyribonucleotide nucleotidyltransferase OS=Escherichia coli (strain B / BL21-DE3) OX=469008 GN=pnp PE=3 SV=1
894	A0A140NE56	uxuA	10	7	23	26	14	7.38283e-05	8.6503e-05	4.76218e-05		1.17168	0.645034	0.372026	0.504804	0.741428		Mannonate dehydratase OS=Escherichia coli (strain B / BL21-DE3) OX=469008 GN=uxuA PE=3 SV=1
730	A0A140N479	mutS	27	21	62	70	44	9.19251e-05	0.000107573	6.91317e-05		1.17022	0.752044	0.688875	0.592309	0.740596		DNA mismatch repair protein MutS OS=Escherichia coli (strain B / BL21-DE3) OX=469008 GN=mutS PE=3 SV=1
189	A0A140N7K8	rpsN	14	13	528	596	645	0.00661156	0.00773533	0.00855878		1.16997	1.29452	0.783444	0.867953	0.740451		30S ribosomal protein S14 OS=Escherichia coli (strain B / BL21-DE3) OX=469008 GN=rpsN PE=3 SV=1
455	A0A140NBS9	yjgA	13	8	47	53	42	0.000324817	0.000379646	0.00030759		1.1688	0.946964	0.871168	0.721756	0.739779		UPF0307 protein YjgA OS=Escherichia coli (strain B / BL21-DE3) OX=469008 GN=yjgA PE=3 SV=1
365	A0A140N9P4	rlmN	16	10	55	62	53	0.000181144	0.000211648	0.000184977		1.1684	1.02116	0.796087	0.761255	0.739549		Dual-specificity RNA methyltransferase RlmN OS=Escherichia coli (strain B / BL21-DE3) OX=469008 GN=rlmN PE=3 SV=1
73	A0A140N5F9	yggL	2	2	8	9	14	9.36823e-05	0.000109238	0.000173731		1.16604	1.85447	0.843025	0.964383	0.738192		Uncharacterized protein OS=Escherichia coli (strain B / BL21-DE3) OX=469008 GN=ECBD_0780 PE=4 SV=1
863	A0A140NCY5	thiL	6	4	16	18	10	6.22627e-05	7.26011e-05	4.12373e-05		1.16604	0.662311	0.290284	0.519695	0.738192		Thiamine-monophosphate kinase OS=Escherichia coli (strain B / BL21-DE3) OX=469008 GN=thiL PE=3 SV=1
759	A0A140N2Y3	mreC	10	7	16	18	11	5.51373e-05	6.42925e-05	4.01698e-05		1.16604	0.728542	0.521367	0.574077	0.738192		Rod shape-determining protein MreC OS=Escherichia coli (strain B / BL21-DE3) OX=469008 GN=ECBD_0497 PE=4 SV=1
673	A0A140N4V5	mlaE	3	2	8	9	6	3.89142e-05	4.53757e-05	3.0928e-05		1.16604	0.794774	0.660891	0.624003	0.738192		Uncharacterized protein OS=Escherichia coli (strain B / BL21-DE3) OX=469008 GN=ECBD_0548 PE=3 SV=1
297	A0A140N6F3	gltS	1	2	8	9	4	2.52311e-05	2.94206e-05	1.33687e-05		1.16604	0.529849	0.962413	0.398904	0.738192		Sodium/glutamate symporter OS=Escherichia coli (strain B / BL21-DE3) OX=469008 GN=gltS PE=3 SV=1
298	A0A140NGF5	yjgR	6	2	8	9	3	2.02354e-05	2.35953e-05	8.04127e-06		1.16604	0.397387	0.46752	0.267588	0.738192		DUF853 domain-containing protein OS=Escherichia coli (strain B / BL21-DE3) OX=469008 GN=ECBD_3773 PE=4 SV=1
398	A0A140N752	accB	12	8	99	111	92	0.000802605	0.000932722	0.000790382		1.16212	0.98477	0.688776	0.742515	0.735919		Biotin carboxyl carrier protein of acetyl-CoA carboxylase OS=Escherichia coli (strain B / BL21-DE3) OX=469008 GN=ECBD_0490 PE=4 SV=1
271	A0A140N9Q6	ydjN	5	5	33	37	36	9.01414e-05	0.000104755	0.000104207		1.16212	1.15603	0.82968	0.82085	0.735919		Sodium:dicarboxylate symporter OS=Escherichia coli (strain B / BL21-DE3) OX=469008 GN=ECBD_1916 PE=3 SV=1
724	A0A140ND33	rlmI	15	10	59	66	42	0.000190839	0.000221269	0.000143961		1.15946	0.754361	0.642551	0.594077	0.734369		Ribosomal RNA large subunit methyltransferase I OS=Escherichia coli (strain B / BL21-DE3) OX=469008 GN=rlmI PE=3 SV=1
249	A0A140NGV6	valS	65	52	609	680	680	0.000809894	0.000937308	0.000958301		1.15732	1.18324	0.82897	0.831144	0.733121		Valine--tRNA ligase OS=Escherichia coli (strain B / BL21-DE3) OX=469008 GN=valS PE=3 SV=1
603	A0A140NBV7	infA	5	5	113	126	91	0.00198489	0.00229399	0.00169388		1.15573	0.853385	0.613043	0.664415	0.732184		Translation initiation factor IF-1 OS=Escherichia coli (strain B / BL21-DE3) OX=469008 GN=infA PE=3 SV=1
573	A0A140NGW4	dusA	12	9	35	39	29	0.000128304	0.000148183	0.000112656		1.15494	0.878036	0.667825	0.680364	0.731722		tRNA-dihydrouridine(20/20a) synthase OS=Escherichia coli (strain B / BL21-DE3) OX=469008 GN=dusA PE=3 SV=1
765	A0A140NDM3	murG	12	10	53	59	36	0.000188816	0.00021786	0.000135909		1.15382	0.719795	0.65625	0.567146	0.731064		UDP-N-acetylglucosamine--N-acetylmuramyl-(pentapeptide) pyrophosphoryl-undecaprenol N-acetylglucosamine transferase OS=Escherichia coli (strain B / BL21-DE3) OX=469008 GN=murG PE=3 SV=1
522	A0A140N9N7	arnB	14	14	125	139	108	0.000417121	0.000480761	0.000381907		1.15257	0.915579	0.60336	0.703487	0.730326		UDP-4-amino-4-deoxy-L-arabinose--oxoglutarate aminotransferase OS=Escherichia coli (strain B / BL21-DE3) OX=469008 GN=arnB PE=3 SV=1
140	A0A140NE25	glmS	36	38	420	467	595	0.000872215	0.0010052	0.0013094		1.15247	1.50124	0.83976	0.917568	0.730268		Glutamine--fructose-6-phosphate aminotransferase [isomerizing] OS=Escherichia coli (strain B / BL21-DE3) OX=469008 GN=glmS PE=3 SV=1
1171	A0A140N7X0	kdsD	7	4	18	20	8	6.94049e-05	7.993e-05	3.26881e-05		1.15165	0.470977	0.703871	0.341253	0.729782		Arabinose 5-phosphate isomerase OS=Escherichia coli (strain B / BL21-DE3) OX=469008 GN=ECBD_0545 PE=3 SV=1
96	A0A140ND16	rffT	6	7	9	10	14	3.17059e-05	3.6514e-05	5.22645e-05		1.15165	1.64842	0.833334	0.941623	0.729782		TDP-N-acetylfucosamine:lipid II N-acetylfucosaminyltransferase OS=Escherichia coli (strain B / BL21-DE3) OX=469008 GN=wecF PE=3 SV=1
599	A0A140NFG5	map	13	12	94	104	76	0.000450314	0.000516396	0.000385819		1.14675	0.856777	0.622925	0.666646	0.726873		Methionine aminopeptidase OS=Escherichia coli (strain B / BL21-DE3) OX=469008 GN=map PE=1 SV=1
307	A0A140NDE0	proS	41	39	656	724	680	0.00145044	0.00165919	0.00159326		1.14392	1.09847	0.761521	0.797224	0.725185		Proline--tRNA ligase OS=Escherichia coli (strain B / BL21-DE3) OX=469008 GN=proS PE=3 SV=1
1033	A0A140NGW9	pyrB	15	10	59	65	31	0.000239929	0.000273972	0.00013359		1.14189	0.556791	0.606734	0.424606	0.723965		Aspartate carbamoyltransferase OS=Escherichia coli (strain B / BL21-DE3) OX=469008 GN=pyrB PE=3 SV=1
257	A0A140N6Z9	rpsE	20	17	1005	1106	1107	0.00761099	0.00868145	0.00888392		1.14065	1.16725	0.776637	0.825159	0.723218		30S ribosomal protein S5 OS=Escherichia coli (strain B / BL21-DE3) OX=469008 GN=rpsE PE=3 SV=1
317	A0A140N8F2	ygcF	5	3	10	11	5	5.67135e-05	6.46609e-05	3.00496e-05		1.14013	0.529849	0.158867	0.398904	0.722907		7-carboxy-7-deazaguanine synthase OS=Escherichia coli (strain B / BL21-DE3) OX=469008 GN=queE PE=3 SV=1
318	A0A140N8B6	yggN	8	2	10	11	2	5.29168e-05	6.03321e-05	1.12152e-05		1.14013	0.21194	0.0763837	0.0938202	0.722907		Uncharacterized protein OS=Escherichia coli (strain B / BL21-DE3) OX=469008 GN=ECBD_0782 PE=4 SV=1
740	A0A140N4T2	pitA	3	4	20	22	14	5.06898e-05	5.77931e-05	3.76011e-05		1.14013	0.741789	0.707111	0.584423	0.722907		Phosphate transporter OS=Escherichia coli (strain B / BL21-DE3) OX=469008 GN=ECBD_0248 PE=3 SV=1
914	A0A140NAT8	yegD	5	2	10	11	6	2.81047e-05	3.20431e-05	1.78695e-05		1.14013	0.635819	0.445075	0.496747	0.722907		Uncharacterized chaperone protein YegD OS=Escherichia coli (strain B / BL21-DE3) OX=469008 GN=ECBD_1586 PE=4 SV=1
447	A0A140N2L2	recG	8	6	10	11	9	1.82498e-05	2.08072e-05	1.74054e-05		1.14013	0.953728	0.676897	0.725569	0.722907		ATP-dependent DNA helicase RecG OS=Escherichia coli (strain B / BL21-DE3) OX=469008 GN=recG PE=3 SV=1
158	A0A140NFM7	rplA	25	24	1310	1439	1722	0.00708022	0.00806118	0.00986259		1.13855	1.39298	0.809799	0.894271	0.721953		50S ribosomal protein L1 OS=Escherichia coli (strain B / BL21-DE3) OX=469008 GN=rplA PE=3 SV=1
151	A0A140NGH1	rpsR	5	6	671	737	905	0.011315	0.0128813	0.0161719		1.13843	1.42925	0.832203	0.902682	0.721882		30S ribosomal protein S18 OS=Escherichia coli (strain B / BL21-DE3) OX=469008 GN=rpsR PE=3 SV=1
628	A0A140NCL7	rluB	17	13	83	91	65	0.000360725	0.000409923	0.00029936		1.13639	0.829884	0.671565	0.648635	0.720643		Pseudouridine synthase OS=Escherichia coli (strain B / BL21-DE3) OX=469008 GN=ECBD_2353 PE=3 SV=1
245	A0A140NDV1	rplI	17	16	1619	1775	1815	0.0137421	0.0156159	0.0163254		1.13635	1.18799	0.793415	0.832885	0.720624		50S ribosomal protein L9 OS=Escherichia coli (strain B / BL21-DE3) OX=469008 GN=rplI PE=3 SV=1
379	A0A140NB60	hepA	45	38	253	277	241	0.00033055	0.00037511	0.000333669		1.13481	1.00944	0.704	0.755347	0.719684		RNA polymerase-associated protein RapA OS=Escherichia coli (strain B / BL21-DE3) OX=469008 GN=rapA PE=3 SV=1
306	A0A140N9F5	bamB	18	13	116	127	121	0.000374251	0.000424689	0.000413688		1.13477	1.10537	0.680134	0.800196	0.719662		Outer membrane protein assembly factor BamB OS=Escherichia coli (strain B / BL21-DE3) OX=469008 GN=bamB PE=3 SV=1
322	A0A140NBY0	ybhC	17	13	74	81	75	0.000219177	0.000248663	0.0002354		1.13453	1.07402	0.787744	0.786393	0.719516		Pectinesterase OS=Escherichia coli (strain B / BL21-DE3) OX=469008 GN=ECBD_2910 PE=4 SV=1
334	A0A140NBD7	pdxH	9	8	32	35	32	0.000185646	0.000210458	0.000196728		1.13365	1.0597	0.766695	0.779818	0.718983		Pyridoxine/pyridoxamine 5'-phosphate oxidase OS=Escherichia coli (strain B / BL21-DE3) OX=469008 GN=pdxH PE=3 SV=1
386	A0A140N793	hscA	24	21	171	187	161	0.000351081	0.000397937	0.000350283		1.13346	0.997727	0.794169	0.749325	0.718867		Chaperone protein HscA OS=Escherichia coli (strain B / BL21-DE3) OX=469008 GN=hscA PE=3 SV=1
621	A0A140N811	rpsO	7	7	271	296	213	0.00385097	0.00435969	0.00320747		1.1321	0.832899	0.703991	0.650691	0.718035		30S ribosomal protein S15 OS=Escherichia coli (strain B / BL21-DE3) OX=469008 GN=rpsO PE=3 SV=1
217	A0A140N8B4	rpsU	10	9	274	299	320	0.00488072	0.00552035	0.00604039		1.13105	1.2376	0.865589	0.850145	0.717396		30S ribosomal protein S21 OS=Escherichia coli (strain B / BL21-DE3) OX=469008 GN=rpsU PE=3 SV=1
273	A0A140NCZ1	yciA	4	3	11	12	12	0.000105393	0.000119168	0.000121837		1.13071	1.15603	0.818289	0.82085	0.717185		Thioesterase superfamily protein OS=Escherichia coli (strain B / BL21-DE3) OX=469008 GN=ECBD_2369 PE=4 SV=1
1137	A0A140NGK4	ytfB	6	3	11	12	5	6.56218e-05	7.41992e-05	3.16088e-05		1.13071	0.481681	0.682568	0.351859	0.717185		Opacity-associated protein A OS=Escherichia coli (strain B / BL21-DE3) OX=469008 GN=ECBD_3823 PE=4 SV=1
127	A0A140NH75	zapB	7	4	56	61	83	0.000896504	0.00101218	0.00140807		1.12903	1.57062	0.762373	0.92988	0.716154		Cell division protein ZapB OS=Escherichia coli (strain B / BL21-DE3) OX=469008 GN=zapB PE=3 SV=1
1407	A0A140NF42	secE	4	1	23	25	7	0.000229042	0.000258042	7.387e-05		1.12661	0.322517	0.330074	0.193401	0.71467		Protein translocase subunit SecE OS=Escherichia coli (strain B / BL21-DE3) OX=469008 GN=secE PE=3 SV=1
182	A0A140N9G0	pyrD	17	14	46	50	57	0.000173145	0.000195067	0.000227357		1.12661	1.3131	0.72315	0.873339	0.71467		Dihydroorotate dehydrogenase (quinone) OS=Escherichia coli (strain B / BL21-DE3) OX=469008 GN=pyrD PE=3 SV=1
1134	A0A140NCM3	mnmA	10	5	35	38	16	0.000120285	0.00013536	5.82701e-05		1.12533	0.484433	0.470686	0.354579	0.713876		tRNA-specific 2-thiouridylase MnmA OS=Escherichia coli (strain B / BL21-DE3) OX=469008 GN=mnmA PE=3 SV=1
859	A0A140N7A7	mlaD	7	7	83	90	52	0.000573612	0.000644682	0.000380825		1.1239	0.663907	0.679162	0.521057	0.712994		Mammalian cell entry related domain protein OS=Escherichia coli (strain B / BL21-DE3) OX=469008 GN=ECBD_0549 PE=4 SV=1
1132	A0A140N539	folC	16	12	83	90	38	0.000248747	0.000279566	0.000120683		1.1239	0.485163	0.500363	0.355299	0.712994		Dihydrofolate synthase/folylpolyglutamate synthase OS=Escherichia coli (strain B / BL21-DE3) OX=469008 GN=ECBD_1344 PE=3 SV=1
817	A0A140NFN5	murE	15	8	83	90	54	0.000212063	0.000238337	0.000146205		1.1239	0.689442	0.489984	0.542499	0.712994		UDP-N-acetylmuramoyl-L-alanyl-D-glutamate--2,6-diaminopimelate ligase OS=Escherichia coli (strain B / BL21-DE3) OX=469008 GN=murE PE=3 SV=1
177	A0A140NCU5	ribE	10	9	119	129	150	0.000964748	0.00108397	0.00128867		1.12358	1.33575	0.91571	0.87963	0.712799		6,7-dimethyl-8-ribityllumazine synthase OS=Escherichia coli (strain B / BL21-DE3) OX=469008 GN=ribH PE=3 SV=1
266	A0A140N3T4	infB	81	69	1002	1086	1099	0.00142387	0.00159953	0.00165494		1.12337	1.16228	0.791549	0.823263	0.71267		Translation initiation factor IF-2 OS=Escherichia coli (strain B / BL21-DE3) OX=469008 GN=infB PE=3 SV=1
335	A0A140N5J7	kdsC	3	3	12	13	12	8.07263e-05	9.06441e-05	8.55455e-05		1.12286	1.0597	0.776522	0.779818	0.71235		3-deoxy-D-manno-octulosonate 8-phosphate phosphatase KdsC OS=Escherichia coli (strain B / BL21-DE3) OX=469008 GN=kdsC PE=1 SV=1
940	A0A140N9U3	ydiJ	23	16	48	52	28	5.96328e-05	6.69591e-05	3.68624e-05		1.12286	0.618157	0.776522	0.481087	0.71235		FAD linked oxidase domain protein OS=Escherichia coli (strain B / BL21-DE3) OX=469008 GN=ECBD_1959 PE=4 SV=1
343	A0A140NCI8	lptF	6	3	12	13	5	4.14659e-05	4.65603e-05	1.83089e-05		1.12286	0.441541	0.189637	0.311891	0.71235		Permease YjgP/YjgQ family protein OS=Escherichia coli (strain B / BL21-DE3) OX=469008 GN=ECBD_3775 PE=4 SV=1
686	A0A140NFM9	rffE	17	13	85	92	63	0.000285905	0.000320741	0.000224557		1.12184	0.785423	0.609201	0.617229	0.711719		UDP-N-acetylglucosamine 2-epimerase OS=Escherichia coli (strain B / BL21-DE3) OX=469008 GN=wecB PE=3 SV=1
739	A0A140NHV0	rpmH	2	3	87	94	61	0.00239195	0.0026787	0.00177724		1.11988	0.743007	0.674726	0.585365	0.710499		50S ribosomal protein L34 OS=Escherichia coli (strain B / BL21-DE3) OX=469008 GN=rpmH PE=3 SV=1
936	A0A140N7N2	fmt	11	9	51	55	30	0.000204763	0.000228879	0.000127639		1.11778	0.623352	0.626013	0.485722	0.709188		Methionyl-tRNA formyltransferase OS=Escherichia coli (strain B / BL21-DE3) OX=469008 GN=fmt PE=3 SV=1
211	A0A140N9I5	folX	5	5	39	42	46	0.000411031	0.000458798	0.000513748		1.11621	1.2499	0.817385	0.854167	0.70821		Dihydroneopterin aldolase OS=Escherichia coli (strain B / BL21-DE3) OX=469008 GN=ECBD_1356 PE=4 SV=1
752	C5WBK5	trmA	13	12	52	56	36	0.000179686	0.000200568	0.000131824		1.11621	0.733637	0.713749	0.578077	0.70821		tRNA/tmRNA (uracil-C(5))-methyltransferase OS=Escherichia coli (strain B / BL21-DE3) OX=469008 GN=trmA PE=3 SV=1
1127	A0A140N8L2	yccK	3	2	13	14	6	0.000150837	0.000168366	7.37732e-05		1.11621	0.489091	0.525366	0.359174	0.70821		Sulfurtransferase OS=Escherichia coli (strain B / BL21-DE3) OX=469008 GN=ECBD_2625 PE=3 SV=1
204	A0A140N8X3	era	8	9	26	28	31	0.000109244	0.00012194	0.000138029		1.11621	1.26349	0.849436	0.858497	0.70821		GTPase Era OS=Escherichia coli (strain B / BL21-DE3) OX=469008 GN=era PE=3 SV=1
1395	A0A140N5V8	ybl87	11	5	26	28	8	7.24284e-05	8.08455e-05	2.36161e-05		1.11621	0.326061	0.0997359	0.196843	0.70821		Phosphomannomutase OS=Escherichia coli (strain B / BL21-DE3) OX=469008 GN=ECBD_1629 PE=3 SV=1
181	A0A140NCU2	lpxA	10	7	66	71	82	0.000318591	0.000355231	0.000419456		1.11501	1.31659	0.87344	0.874327	0.707453		Acyl-[acyl-carrier-protein]--UDP-N-acetylglucosamine O-acyltransferase OS=Escherichia coli (strain B / BL21-DE3) OX=469008 GN=lpxA PE=3 SV=1
1199	A0A140N1Z5	yibK	6	2	14	15	6	0.000112777	0.000125241	5.12183e-05		1.11052	0.454156	0.734989	0.324504	0.704627		tRNA (cytidine(34)-2'-O)-methyltransferase OS=Escherichia coli (strain B / BL21-DE3) OX=469008 GN=trmL PE=3 SV=1
399	A0A140N9F9	trmD	6	4	14	15	13	6.94351e-05	7.7109e-05	6.83245e-05		1.11052	0.984005	0.598727	0.742109	0.704627		tRNA (guanine-N(1)-)-methyltransferase OS=Escherichia coli (strain B / BL21-DE3) OX=469008 GN=trmD PE=3 SV=1
300	A0A140NAF7	purU	12	12	85	91	90	0.00038393	0.000426027	0.000430783		1.10965	1.12203	0.861006	0.807208	0.704076		Formyltetrahydrofolate deformylase OS=Escherichia coli (strain B / BL21-DE3) OX=469008 GN=purU PE=3 SV=1
547	A0A140NEV5	ahpF	26	25	227	243	193	0.000540658	0.000599882	0.00048712		1.10954	0.900977	0.629281	0.694659	0.704008		Alkyl hydroperoxide reductase, F subunit OS=Escherichia coli (strain B / BL21-DE3) OX=469008 GN=ECBD_3046 PE=4 SV=1
175	A0A140NDA6	trxB	14	13	173	185	220	0.000681605	0.000755476	0.000918526		1.10838	1.34759	0.86115	0.882804	0.703272		Thioredoxin reductase OS=Escherichia coli (strain B / BL21-DE3) OX=469008 GN=ECBD_2707 PE=3 SV=1
155	A0A140N6G0	eno	34	31	1185	1267	1579	0.00346917	0.00384456	0.0048986		1.10821	1.41204	0.822023	0.898771	0.703163		Enolase OS=Escherichia coli (strain B / BL21-DE3) OX=469008 GN=eno PE=3 SV=1
463	A0A140NEP3	kefA	22	17	44	47	39	4.96851e-05	5.5009e-05	4.66681e-05		1.10715	0.939278	0.653414	0.717369	0.702495		MscS Mechanosensitive ion channel OS=Escherichia coli (strain B / BL21-DE3) OX=469008 GN=ECBD_3191 PE=4 SV=1
192	A0A140N548	rpsD	22	22	1047	1117	1270	0.00642793	0.00710788	0.00826247		1.10578	1.2854	0.840822	0.865237	0.701622		30S ribosomal protein S4 OS=Escherichia coli (strain B / BL21-DE3) OX=469008 GN=rpsD PE=3 SV=1
958	A0A140N4D3	slmA	5	3	30	32	17	0.000191623	0.000211855	0.000115069		1.10558	0.600496	0.609201	0.465151	0.701496		Nucleoid occlusion factor SlmA OS=Escherichia coli (strain B / BL21-DE3) OX=469008 GN=slmA PE=3 SV=1
1021	A0A140N508	bfr	5	2	15	16	8	0.000120068	0.000132745	6.78588e-05		1.10558	0.565172	0.798665	0.432497	0.701496		Bacterioferritin OS=Escherichia coli (strain B / BL21-DE3) OX=469008 GN=ECBD_0415 PE=3 SV=1
176	A0A140NDX1	rarA	12	6	46	49	58	0.000130149	0.000143695	0.000173898		1.10408	1.33614	0.734989	0.879735	0.700538		AAA ATPase central domain protein OS=Escherichia coli (strain B / BL21-DE3) OX=469008 GN=ECBD_2703 PE=4 SV=1
366	A0A140NGQ8	yjdM	5	4	16	17	11	0.000182301	0.000200761	0.000132814		1.10126	0.728542	0.115353	0.574077	0.698736		Alkylphosphonate utilization operon protein PhnA OS=Escherichia coli (strain B / BL21-DE3) OX=469008 GN=ECBD_3923 PE=4 SV=1
674	A0A140NAK0	ldcA	9	4	16	17	12	6.65638e-05	7.33043e-05	5.29031e-05		1.10126	0.794774	0.6182	0.624003	0.698736		Muramoyltetrapeptide carboxypeptidase OS=Escherichia coli (strain B / BL21-DE3) OX=469008 GN=ECBD_2430 PE=4 SV=1
180	A0A140NAS0	yceG	9	8	16	17	20	5.95158e-05	6.55426e-05	7.8836e-05		1.10126	1.32462	0.571668	0.876575	0.698736		Endolytic murein transglycosylase OS=Escherichia coli (strain B / BL21-DE3) OX=469008 GN=mltG PE=3 SV=1
319	A0A140N8N1	emrA	18	16	66	70	67	0.000214028	0.000235281	0.000230242		1.0993	1.07575	0.529223	0.787178	0.697475		Efflux pump membrane protein OS=Escherichia coli (strain B / BL21-DE3) OX=469008 GN=ECBD_1035 PE=4 SV=1
387	A0A140N2J1	hslO	8	8	68	72	64	0.000294522	0.000323224	0.000293745		1.09745	0.997363	0.665662	0.749136	0.696285		33 kDa chaperonin OS=Escherichia coli (strain B / BL21-DE3) OX=469008 GN=hslO PE=3 SV=1
134	A0A140NDR0	ymbA	4	4	17	18	25	0.000114974	0.000126178	0.000179173		1.09745	1.55838	0.764924	0.927841	0.696285		ABC_trans_aux domain-containing protein OS=Escherichia coli (strain B / BL21-DE3) OX=469008 GN=ECBD_2643 PE=4 SV=1
472	A0A140N4C9	rsmE	7	8	17	18	15	8.84777e-05	9.71002e-05	8.27292e-05		1.09745	0.935028	0.837959	0.71492	0.696285		Ribosomal RNA small subunit methyltransferase E OS=Escherichia coli (strain B / BL21-DE3) OX=469008 GN=ECBD_0794 PE=3 SV=1
279	A0A140N6R1	stpA	10	9	104	110	113	0.000981567	0.00107607	0.00113018		1.09628	1.1514	0.764376	0.819043	0.695528		DNA-binding protein OS=Escherichia coli (strain B / BL21-DE3) OX=469008 GN=ECBD_1050 PE=3 SV=1
578	A0A140N6N3	purC	13	8	52	55	43	0.000277489	0.000304206	0.000243161		1.09628	0.876289	0.387943	0.679254	0.695528		Phosphoribosylaminoimidazole-succinocarboxamide synthase OS=Escherichia coli (strain B / BL21-DE3) OX=469008 GN=purC PE=3 SV=1
234	A0A140N4S7	sspA	13	11	157	166	179	0.000936602	0.00102642	0.00113159		1.0959	1.20819	0.72107	0.840117	0.695282		Glutathione S-transferase domain protein OS=Escherichia coli (strain B / BL21-DE3) OX=469008 GN=ECBD_0518 PE=3 SV=1
311	A0A140ND23	fabG	12	11	246	260	253	0.00127508	0.00139681	0.00138965		1.09547	1.08985	0.775579	0.793463	0.695004		3-oxoacyl-[acyl-carrier-protein] reductase OS=Escherichia coli (strain B / BL21-DE3) OX=469008 GN=ECBD_2508 PE=3 SV=1
123	A0A140N528	rpsS	7	6	517	546	778	0.00710713	0.00777963	0.0113335		1.09462	1.59467	0.886729	0.933729	0.694455		30S ribosomal protein S19 OS=Escherichia coli (strain B / BL21-DE3) OX=469008 GN=rpsS PE=3 SV=1
357	A0A140NCW5	yajG	8	7	74	78	72	0.000487441	0.000532534	0.00050258		1.09251	1.03106	0.787744	0.766145	0.693084		Uncharacterized lipoprotein OS=Escherichia coli (strain B / BL21-DE3) OX=469008 GN=ECBD_3224 PE=4 SV=1
392	A0A140NG24	pcnB	23	21	77	81	72	0.000206319	0.000224956	0.000204439		1.09033	0.990887	0.705978	0.745749	0.691663		Poly(A) polymerase I OS=Escherichia coli (strain B / BL21-DE3) OX=469008 GN=pcnB PE=3 SV=1
754	A0A140NEN6	groS	7	6	676	710	467	0.00881386	0.0095949	0.00645236		1.08861	0.73207	0.698243	0.576849	0.690545		10 kDa chaperonin OS=Escherichia coli (strain B / BL21-DE3) OX=469008 GN=groS PE=3 SV=1
255	A0A140NCT4	acrB	31	28	146	153	161	0.000176023	0.000191192	0.000205695		1.08618	1.16857	0.67083	0.825661	0.688949		Efflux pump membrane transporter OS=Escherichia coli (strain B / BL21-DE3) OX=469008 GN=ECBD_3194 PE=3 SV=1
791	A0A140NC79	cspE	7	5	63	66	42	0.00115474	0.00125386	0.000815781		1.08584	0.706465	0.389099	0.556436	0.688727		Cold-shock DNA-binding domain protein OS=Escherichia coli (strain B / BL21-DE3) OX=469008 GN=ECBD_3027 PE=4 SV=1
885	A0A140N8S7	cmk	9	7	44	46	27	0.000245142	0.000265635	0.000159409		1.0836	0.650269	0.571668	0.509346	0.687251		Cytidylate kinase OS=Escherichia coli (strain B / BL21-DE3) OX=469008 GN=cmk PE=3 SV=1
963	A0A140N6X3	yfdZ	10	4	23	24	13	7.06028e-05	7.63603e-05	4.22883e-05		1.08155	0.59896	0.710878	0.463752	0.6859		Aminotransferase class I and II OS=Escherichia coli (strain B / BL21-DE3) OX=469008 GN=ECBD_1293 PE=4 SV=1
239	A0A140N7J9	accC	25	26	371	387	420	0.00104501	0.00112984	0.00125365		1.08118	1.19966	0.820925	0.837097	0.685659		Biotin carboxylase OS=Escherichia coli (strain B / BL21-DE3) OX=469008 GN=ECBD_0489 PE=4 SV=1
384	A0A140N9B3	gloA	4	2	24	25	6	0.000224838	0.00024275	5.9565e-05		1.07967	0.264925	0.0302738	0.139251	0.684657		Lactoylglutathione lyase OS=Escherichia coli (strain B / BL21-DE3) OX=469008 GN=ECBD_1992 PE=3 SV=1
286	A0A140NEK1	purA	33	29	321	334	344	0.000939751	0.00101348	0.00106721		1.07846	1.13563	0.736651	0.812768	0.683854		Adenylosuccinate synthetase OS=Escherichia coli (strain B / BL21-DE3) OX=469008 GN=purA PE=3 SV=1
288	A0A140N4S8	bamC	20	16	126	131	135	0.000463237	0.000499191	0.000525955		1.07761	1.13539	0.80266	0.812673	0.683292		Outer membrane protein assembly factor BamC OS=Escherichia coli (strain B / BL21-DE3) OX=469008 GN=bamC PE=3 SV=1
215	A0A140NA83	fabI	16	16	354	368	415	0.00170881	0.0018412	0.00212286		1.07747	1.2423	0.83164	0.851693	0.683199		Enoyl-[acyl-carrier-protein] reductase [NADH] OS=Escherichia coli (strain B / BL21-DE3) OX=469008 GN=ECBD_2329 PE=1 SV=1
124	A0A140N7B7	guaB	25	27	588	611	875	0.00152387	0.00164125	0.00240304		1.07703	1.57693	0.842446	0.93091	0.682901		Inosine-5'-monophosphate dehydrogenase OS=Escherichia coli (strain B / BL21-DE3) OX=469008 GN=guaB PE=3 SV=1
1539	A0A140N3I1	secY	12	5	82	85	20	0.0002341	0.000251518	6.05062e-05		1.0744	0.258463	0.431719	0.133443	0.681152		Protein translocase subunit SecY OS=Escherichia coli (strain B / BL21-DE3) OX=469008 GN=secY PE=3 SV=1
351	A0A140N6H9	trmJ	9	9	55	57	54	0.000282761	0.000303734	0.000294193		1.07417	1.04043	0.744565	0.770698	0.680999		tRNA (cytidine/uridine-2'-O-)-methyltransferase TrmJ OS=Escherichia coli (strain B / BL21-DE3) OX=469008 GN=trmJ PE=4 SV=1
675	A0A140NCC1	plsB	29	24	116	120	87	0.000181792	0.000194922	0.000144484		1.07222	0.794774	0.591387	0.624003	0.679694		Glycerol-3-phosphate acyltransferase OS=Escherichia coli (strain B / BL21-DE3) OX=469008 GN=plsB PE=3 SV=1
246	A0A140N9J2	ycaO	11	10	58	60	65	0.000125176	0.000134217	0.000148658		1.07222	1.18759	0.931654	0.83274	0.679694		YcaO domain-containing protein OS=Escherichia coli (strain B / BL21-DE3) OX=469008 GN=ECBD_2690 PE=4 SV=1
702	A0A140NC45	ybiT	29	25	148	153	108	0.000353165	0.000378416	0.0002731		1.0715	0.773293	0.72768	0.608306	0.679208		ABC transporter related OS=Escherichia coli (strain B / BL21-DE3) OX=469008 GN=ECBD_2803 PE=4 SV=1
560	A0A140N9X9	grxD	4	4	62	64	52	0.000681844	0.000729518	0.000606009		1.06992	0.888779	0.552635	0.687124	0.678146		Glutaredoxin OS=Escherichia coli (strain B / BL21-DE3) OX=469008 GN=ECBD_1989 PE=3 SV=1
229	A0A140N2S3	rplV	17	17	1104	1138	1269	0.0126931	0.0135614	0.0154612		1.0684	1.21808	0.80724	0.843553	0.677126		50S ribosomal protein L22 OS=Escherichia coli (strain B / BL21-DE3) OX=469008 GN=rplV PE=3 SV=1
359	A0A140N742	htpX	6	5	34	35	33	0.000146758	0.000156586	0.000150945		1.06697	1.02853	0.665662	0.764904	0.676158		Protease HtpX OS=Escherichia coli (strain B / BL21-DE3) OX=469008 GN=htpX PE=3 SV=1
259	A0A140NEW8	clpP	7	5	69	71	76	0.00042157	0.000449616	0.000492059		1.06653	1.1672	0.877255	0.825142	0.675859		ATP-dependent Clp protease proteolytic subunit OS=Escherichia coli (strain B / BL21-DE3) OX=469008 GN=clpP PE=3 SV=1
557	A0A140NDN0	ddlB	14	9	69	71	58	0.00028518	0.000304152	0.000254027		1.06653	0.890761	0.617554	0.688358	0.675859		D-alanine--D-alanine ligase OS=Escherichia coli (strain B / BL21-DE3) OX=469008 GN=ddl PE=3 SV=1
214	A0A140NF10	ilvD	31	27	175	180	206	0.000359293	0.000383041	0.000448188		1.0661	1.24742	0.906907	0.853362	0.675569		Dihydroxy-acid dehydratase OS=Escherichia coli (strain B / BL21-DE3) OX=469008 GN=ilvD PE=3 SV=1
542	A0A140N429	sdaB	14	14	110	113	94	0.000305754	0.000325552	0.000276879		1.06475	0.90556	0.699106	0.697453	0.674658		L-serine dehydratase OS=Escherichia coli (strain B / BL21-DE3) OX=469008 GN=ECBD_0931 PE=3 SV=1
281	A0A140N4M0	rplQ	13	14	571	585	617	0.00568622	0.00603818	0.00651111		1.0619	1.14507	0.780878	0.816546	0.672719		50S ribosomal protein L17 OS=Escherichia coli (strain B / BL21-DE3) OX=469008 GN=rplQ PE=3 SV=1
774	C6EGE8	rplW	11	12	369	378	249	0.00466678	0.00495502	0.00333713		1.06176	0.715081	0.661112	0.563379	0.672629		50S ribosomal protein L23 OS=Escherichia coli (strain B / BL21-DE3) OX=469008 GN=rplW PE=3 SV=1
864	A0A140NCR0	rnr	31	24	128	131	80	0.000199118	0.00021122	0.000131878		1.06078	0.662311	0.6012	0.519695	0.671956		Ribonuclease R OS=Escherichia coli (strain B / BL21-DE3) OX=469008 GN=rnr PE=3 SV=1
631	A0A140NB38	eda	10	11	136	139	106	0.000807515	0.000855439	0.00066696		1.05935	0.825941	0.742757	0.645932	0.670981		2-dehydro-3-deoxyphosphogluconate aldolase/4-hydroxy-2-oxoglutarate aldolase OS=Escherichia coli (strain B / BL21-DE3) OX=469008 GN=ECBD_1789 PE=1 SV=1
964	A0A140N9Z5	zipA	9	5	46	47	26	0.000177368	0.000187836	0.000106236		1.05902	0.59896	0.612349	0.463752	0.670755		Cell division protein ZipA OS=Escherichia coli (strain B / BL21-DE3) OX=469008 GN=zipA PE=3 SV=1
658	A0A140N7T4	parC	22	21	84	85	64	0.000141271	0.000148168	0.000114061		1.04882	0.807389	0.679878	0.633	0.663737		DNA topoisomerase 4 subunit A OS=Escherichia coli (strain B / BL21-DE3) OX=469008 GN=parC PE=3 SV=1
377	A0A140ND17	secA	52	48	342	346	326	0.000480057	0.000503391	0.000484916		1.04861	1.01012	0.794169	0.755696	0.663587		Protein translocase subunit SecA OS=Escherichia coli (strain B / BL21-DE3) OX=469008 GN=secA PE=2 SV=1
568	A0A140N779	arnC	13	8	107	108	89	0.000420261	0.000439665	0.000370431		1.04617	0.881431	0.591266	0.682513	0.661894		Undecaprenyl-phosphate 4-deoxy-4-formamido-L-arabinose transferase OS=Escherichia coli (strain B / BL21-DE3) OX=469008 GN=arnC PE=3 SV=1
280	A0A140NH27	rpoC	100	100	1599	1604	1732	0.00143729	0.00149439	0.00164979		1.03972	1.14784	0.771479	0.817643	0.657386		DNA-directed RNA polymerase subunit beta' OS=Escherichia coli (strain B / BL21-DE3) OX=469008 GN=rpoC PE=3 SV=1
224	A0A140N5H6	speA	27	23	320	321	368	0.000615057	0.000639489	0.000749541		1.03972	1.21865	0.726523	0.843751	0.657385		Biosynthetic arginine decarboxylase OS=Escherichia coli (strain B / BL21-DE3) OX=469008 GN=speA PE=3 SV=1
143	A0A140NHL8	nusG	12	11	178	178	251	0.00124375	0.00128913	0.00185853		1.03648	1.49429	0.819667	0.91623	0.655104		Transcription termination/antitermination protein NusG OS=Escherichia coli (strain B / BL21-DE3) OX=469008 GN=nusG PE=3 SV=1
209	A0A140NI72	ilvC	35	36	313	313	371	0.000806221	0.000835635	0.00101267		1.03648	1.25606	0.912136	0.856146	0.655104		Ketol-acid reductoisomerase (NADP(+)) OS=Escherichia coli (strain B / BL21-DE3) OX=469008 GN=ilvC PE=3 SV=1
450	A0A140ND70	acrA	22	22	207	207	186	0.000659434	0.000683492	0.000627908		1.03648	0.952193	0.719107	0.724707	0.655104		Efflux transporter, RND family, MFP subunit OS=Escherichia coli (strain B / BL21-DE3) OX=469008 GN=ECBD_3193 PE=3 SV=1
705	C5W331	rsmH	10	9	66	66	48	0.00026668	0.00027641	0.000205528		1.03648	0.77069	0.577512	0.606371	0.655104		Ribosomal RNA small subunit methyltransferase H OS=Escherichia coli (strain B / BL21-DE3) OX=469008 GN=rsmH PE=3 SV=1
1211	A0A140N4F0	dnaN	10	7	76	76	32	0.000262618	0.000272199	0.000117177		1.03648	0.446189	0.591727	0.316542	0.655104		Beta sliding clamp OS=Escherichia coli (strain B / BL21-DE3) OX=469008 GN=ECBD_0002 PE=3 SV=1
548	A0A140N771	sspB	7	4	33	33	28	0.000252942	0.000262171	0.00022743		1.03648	0.899138	0.7009	0.693533	0.655104		Stringent starvation protein B OS=Escherichia coli (strain B / BL21-DE3) OX=469008 GN=ECBD_0519 PE=4 SV=1
320	A0A140N9H5	yfiF	17	11	67	67	68	0.000245611	0.000254571	0.000264158		1.03648	1.07551	0.849248	0.78707	0.655104		tRNA/rRNA methyltransferase (SpoU) OS=Escherichia coli (strain B / BL21-DE3) OX=469008 GN=ECBD_1099 PE=3 SV=1
1294	A0A140NCZ8	speD	8	4	42	42	16	0.000201204	0.000208545	8.1225e-05		1.03648	0.403695	0.46222	0.273918	0.655104		S-adenosylmethionine decarboxylase proenzyme OS=Escherichia coli (strain B / BL21-DE3) OX=469008 GN=speD PE=3 SV=1
1098	A0A140N9C4	slyB	5	4	23	23	11	0.000187667	0.000194514	9.51118e-05		1.03648	0.506812	0.657331	0.37656	0.655104		17 kDa surface antigen OS=Escherichia coli (strain B / BL21-DE3) OX=469008 GN=ECBD_2002 PE=4 SV=1
1274	A0A140N3X6	dppA	22	10	78	78	30	0.000184388	0.000191115	7.51521e-05		1.03648	0.407576	0.189637	0.277815	0.655104		Extracellular solute-binding protein family 5 OS=Escherichia coli (strain B / BL21-DE3) OX=469008 GN=ECBD_0192 PE=4 SV=1
959	A0A140NEB5	bioD	6	5	30	30	17	0.000168628	0.00017478	0.00010126		1.03648	0.600496	0.383077	0.465151	0.655104		ATP-dependent dethiobiotin synthetase BioD OS=Escherichia coli (strain B / BL21-DE3) OX=469008 GN=bioD PE=3 SV=1
898	A0A140N8R1	baeR	8	5	28	28	17	0.00014755	0.000152933	9.49317e-05		1.03648	0.643388	0.246685	0.503371	0.655104		Two component transcriptional regulator, winged helix family OS=Escherichia coli (strain B / BL21-DE3) OX=469008 GN=ECBD_1574 PE=4 SV=1
706	A0A140N754	yhdE	6	5	22	22	16	0.000141237	0.00014639	0.00010885		1.03648	0.77069	0.351139	0.606371	0.655104		dTTP/UTP pyrophosphatase OS=Escherichia coli (strain B / BL21-DE3) OX=469008 GN=ECBD_0499 PE=3 SV=1
1297	A0A140N6U7	rluD	8	6	32	32	12	0.000124143	0.000128673	4.9333e-05		1.03648	0.397387	0.717834	0.267588	0.655104		Pseudouridine synthase OS=Escherichia coli (strain B / BL21-DE3) OX=469008 GN=ECBD_1090 PE=3 SV=1
1065	A0A140NBY1	slyA	6	3	14	14	7	0.000122958	0.000127444	6.51492e-05		1.03648	0.529849	0.418858	0.398904	0.655104		Transcriptional regulator SlyA OS=Escherichia coli (strain B / BL21-DE3) OX=469008 GN=slyA PE=3 SV=1
1312	A0A140N9J8	tktB	7	5	60	60	22	0.000113767	0.000117918	4.42049e-05		1.03648	0.388556	0.269906	0.258734	0.655104		Transketolase OS=Escherichia coli (strain B / BL21-DE3) OX=469008 GN=ECBD_1225 PE=3 SV=1
494	A0A140NCS0	gmhB	2	1	17	17	2	0.000113158	0.000117287	1.41075e-05		1.03648	0.12467	0.43435	0.0341171	0.655104		D,D-heptose 1,7-bisphosphate phosphatase OS=Escherichia coli (strain B / BL21-DE3) OX=469008 GN=ECBD_3418 PE=3 SV=1
897	A0A140NBK6	sppA	15	13	51	51	31	0.000104369	0.000108177	6.72275e-05		1.03648	0.64413	0.43435	0.504017	0.655104		Protease 4 OS=Escherichia coli (strain B / BL21-DE3) OX=469008 GN=ECBD_1878 PE=3 SV=1
486	A0A140NEN2	yjeI	2	3	9	9	3	9.72855e-05	0.000100835	3.43644e-05		1.03648	0.353233	0.404055	0.223524	0.655104		Uncharacterized protein OS=Escherichia coli (strain B / BL21-DE3) OX=469008 GN=ECBD_3887 PE=4 SV=1
394	A0A140N688	rdgB	2	2	15	15	14	9.62978e-05	9.98111e-05	9.52435e-05		1.03648	0.989052	0.848595	0.744783	0.655104		dITP/XTP pyrophosphatase OS=Escherichia coli (strain B / BL21-DE3) OX=469008 GN=ECBD_0786 PE=3 SV=1
609	A0A140NBY9	tolA	10	10	30	30	24	9.01219e-05	9.34099e-05	7.64016e-05		1.03648	0.847759	0.53172	0.660688	0.655104		Protein TolA OS=Escherichia coli (strain B / BL21-DE3) OX=469008 GN=ECBD_2921 PE=4 SV=1
475	A0A140NCN1	ybeY	2	2	10	10	4	8.15943e-05	8.45711e-05	3.45861e-05		1.03648	0.423879	0.0763837	0.294183	0.655104		Endoribonuclease YbeY OS=Escherichia coli (strain B / BL21-DE3) OX=469008 GN=ybeY PE=3 SV=1
495	A0A140NAD7	osmC	4	1	9	9	1	7.95972e-05	8.25012e-05	9.37211e-06		1.03648	0.117744	0.0237808	0.0304499	0.655104		Peroxiredoxin OS=Escherichia coli (strain B / BL21-DE3) OX=469008 GN=ECBD_2157 PE=4 SV=1
478	A0A140N3K3	hybG	1	1	5	5	2	7.71165e-05	7.993e-05	3.26881e-05		1.03648	0.423879	0.0763837	0.294183	0.655104		Hydrogenase assembly chaperone hypC/hupF OS=Escherichia coli (strain B / BL21-DE3) OX=469008 GN=ECBD_0748 PE=4 SV=1
564	A0A140N9C0	yebF	2	2	6	6	5	6.43074e-05	6.66535e-05	5.67887e-05		1.03648	0.883082	0.812345	0.683554	0.655104		Protein YebF OS=Escherichia coli (strain B / BL21-DE3) OX=469008 GN=yebF PE=3 SV=1
238	A0A140N9Y4	cysM	5	6	15	15	17	6.26095e-05	6.48937e-05	7.51934e-05		1.03648	1.20099	0.609201	0.837572	0.655104		Cysteine synthase OS=Escherichia coli (strain B / BL21-DE3) OX=469008 GN=ECBD_1260 PE=3 SV=1
637	A0A140N889	ruvA	3	2	9	9	7	5.60709e-05	5.81166e-05	4.62142e-05		1.03648	0.82421	0.669858	0.64474	0.655104		Holliday junction ATP-dependent DNA helicase RuvA OS=Escherichia coli (strain B / BL21-DE3) OX=469008 GN=ruvA PE=3 SV=1
1337	A0A140N4C7	spoT	9	6	31	31	11	5.58491e-05	5.78867e-05	2.10005e-05		1.03648	0.376022	0.485256	0.246194	0.655104		(P)ppGpp synthetase I, SpoT/RelA OS=Escherichia coli (strain B / BL21-DE3) OX=469008 GN=ECBD_0075 PE=3 SV=1
1022	A0A140NBW7	leuB	7	3	15	15	8	5.22608e-05	5.41675e-05	2.95364e-05		1.03648	0.565172	0.318784	0.432497	0.655104		3-isopropylmalate dehydrogenase OS=Escherichia coli (strain B / BL21-DE3) OX=469008 GN=leuB PE=3 SV=1
482	A0A140N6V7	ung	3	2	8	8	3	4.41821e-05	4.5794e-05	1.75574e-05		1.03648	0.397387	0.571668	0.267588	0.655104		Uracil-DNA glycosylase OS=Escherichia coli (strain B / BL21-DE3) OX=469008 GN=ung PE=3 SV=1
336	A0A140NCQ5	tdk	4	3	7	7	7	4.31853e-05	4.47608e-05	4.57633e-05		1.03648	1.0597	0.80266	0.779818	0.655104		Thymidine kinase OS=Escherichia coli (strain B / BL21-DE3) OX=469008 GN=tdk PE=3 SV=1
622	A0A140N6I8	envC	8	7	14	14	11	4.22577e-05	4.37994e-05	3.51846e-05		1.03648	0.83262	0.543376	0.650501	0.655104		Peptidase M23 OS=Escherichia coli (strain B / BL21-DE3) OX=469008 GN=ECBD_0112 PE=4 SV=1
484	A0A140N2E4	livJ	3	2	11	11	4	3.79069e-05	3.92899e-05	1.46072e-05		1.03648	0.385345	0.015655	0.255518	0.655104		Extracellular ligand-binding receptor OS=Escherichia coli (strain B / BL21-DE3) OX=469008 GN=ECBD_0281 PE=4 SV=1
865	A0A140NFW6	fdhD	6	2	8	8	5	3.6526e-05	3.78586e-05	2.41916e-05		1.03648	0.662311	0.46752	0.519695	0.655104		Sulfur carrier protein FdhD OS=Escherichia coli (strain B / BL21-DE3) OX=469008 GN=fdhD PE=3 SV=1
492	A0A140NAL5	ycgN	1	1	4	4	1	3.41814e-05	3.54284e-05	9.05549e-06		1.03648	0.264925	0.351139	0.139251	0.655104		UPF0260 protein YcgN OS=Escherichia coli (strain B / BL21-DE3) OX=469008 GN=ycgN PE=3 SV=1
707	A0A140NDA8	lolE	4	2	11	11	8	3.37666e-05	3.49985e-05	2.60235e-05		1.03648	0.77069	0.553805	0.606371	0.655104		Lipoprotein releasing system, transmembrane protein LolE OS=Escherichia coli (strain B / BL21-DE3) OX=469008 GN=ECBD_2483 PE=4 SV=1
429	A0A140ND15	ychJ	1	1	4	4	4	3.32819e-05	3.44961e-05	3.52687e-05		1.03648	1.0597	0.734989	0.779818	0.655104		UPF0225 protein YchJ OS=Escherichia coli (strain B / BL21-DE3) OX=469008 GN=ychJ PE=3 SV=1
476	A0A140NC04	tehB	2	1	5	5	2	3.20993e-05	3.32704e-05	1.36062e-05		1.03648	0.423879	0.609201	0.294183	0.655104		Tellurite resistance protein TehB OS=Escherichia coli (strain B / BL21-DE3) OX=469008 GN=ECBD_2210 PE=4 SV=1
490	A0A140N6M2	yniA	6	2	7	7	2	3.09545e-05	3.20838e-05	9.37211e-06		1.03648	0.302771	0.0396405	0.174422	0.655104		Fructosamine kinase OS=Escherichia coli (strain B / BL21-DE3) OX=469008 GN=ECBD_1920 PE=3 SV=1
473	A0A140NAT5	sapD	5	2	7	7	3	2.68272e-05	2.7806e-05	1.21837e-05		1.03648	0.454156	0.281548	0.324504	0.655104		Oligopeptide/dipeptide ABC transporter, ATPase subunit OS=Escherichia coli (strain B / BL21-DE3) OX=469008 GN=ECBD_2326 PE=3 SV=1
460	A0A140NF27	asnC	2	1	3	3	2	2.49614e-05	2.58721e-05	1.76344e-05		1.03648	0.706465	0.503795	0.556436	0.655104		Transcriptional regulator, AsnC family OS=Escherichia coli (strain B / BL21-DE3) OX=469008 GN=ECBD_4289 PE=4 SV=1
454	A0A140NAS9	yceF	2	2	4	4	3	2.44389e-05	2.53305e-05	1.94234e-05		1.03648	0.794774	0.351139	0.624003	0.655104		7-methyl-GTP pyrophosphatase OS=Escherichia coli (strain B / BL21-DE3) OX=469008 GN=ECBD_2514 PE=3 SV=1
337	A0A140NAH2	sapF	4	2	5	5	5	2.35954e-05	2.44562e-05	2.5004e-05		1.03648	1.0597	0.825202	0.779818	0.655104		ABC transporter related OS=Escherichia coli (strain B / BL21-DE3) OX=469008 GN=ECBD_2327 PE=4 SV=1
417	A0A140N8L7	ompW	1	1	3	3	5	1.78969e-05	1.85498e-05	3.16088e-05		1.03648	1.76616	0.503795	0.955919	0.655104		OmpW family protein OS=Escherichia coli (strain B / BL21-DE3) OX=469008 GN=ECBD_2366 PE=4 SV=1
431	A0A140N5J6	garR	2	1	4	4	4	1.70907e-05	1.77142e-05	1.8111e-05		1.03648	1.0597	0.843025	0.779818	0.655104		2-hydroxy-3-oxopropionate reductase OS=Escherichia coli (strain B / BL21-DE3) OX=469008 GN=garR PE=3 SV=1
488	A0A140N965	ybiH	2	1	3	3	1	1.70141e-05	1.76348e-05	6.00992e-06		1.03648	0.353233	0.503795	0.223524	0.655104		Transcriptional regulator, TetR family OS=Escherichia coli (strain B / BL21-DE3) OX=469008 GN=ECBD_2827 PE=4 SV=1
458	A0A140N9J7	mdtK	3	2	6	6	4	1.66045e-05	1.72103e-05	1.17305e-05		1.03648	0.706465	0.632857	0.556436	0.655104		Multidrug resistance protein MdtK OS=Escherichia coli (strain B / BL21-DE3) OX=469008 GN=mdtK PE=3 SV=1
491	A0A140NDI1	yadB	4	1	4	4	1	1.64248e-05	1.70241e-05	4.35134e-06		1.03648	0.264925	0.843025	0.139251	0.655104		Glutamyl-Q tRNA(Asp) synthetase OS=Escherichia coli (strain B / BL21-DE3) OX=469008 GN=gluQ PE=3 SV=1
422	A0A140N7L0	cysZ	2	1	3	3	4	1.49966e-05	1.55437e-05	2.11891e-05		1.03648	1.41293	0.503795	0.898978	0.655104		Sulfate transporter CysZ OS=Escherichia coli (strain B / BL21-DE3) OX=469008 GN=cysZ PE=3 SV=1
433	A0A140N4M6	tag	2	1	2	2	2	1.35263e-05	1.40198e-05	1.43338e-05		1.03648	1.0597	0.734989	0.779818	0.655104		DNA-3-methyladenine glycosylase I OS=Escherichia coli (strain B / BL21-DE3) OX=469008 GN=ECBD_0188 PE=4 SV=1
477	A0A140N7D9	ydcW	3	2	5	5	2	1.33408e-05	1.38276e-05	5.6549e-06		1.03648	0.423879	0.734989	0.294183	0.655104		Gamma-aminobutyraldehyde dehydrogenase OS=Escherichia coli (strain B / BL21-DE3) OX=469008 GN=patD PE=3 SV=1
489	A0A140N689	nadK	2	1	3	3	1	1.29936e-05	1.34677e-05	4.58977e-06		1.03648	0.353233	0.189637	0.223524	0.655104		NAD kinase OS=Escherichia coli (strain B / BL21-DE3) OX=469008 GN=nadK PE=3 SV=1
468	A0A140NBX7	ydcM	4	2	4	4	2	1.25842e-05	1.30433e-05	6.66772e-06		1.03648	0.529849	0.949453	0.398904	0.655104		Transposase, IS605 OrfB family OS=Escherichia coli (strain B / BL21-DE3) OX=469008 GN=ECBD_2207 PE=4 SV=1
434	A0A140NC92	cyoC	2	2	2	2	2	1.23991e-05	1.28515e-05	1.31393e-05		1.03648	1.0597	0.351139	0.779818	0.655104		Cytochrome o ubiquinol oxidase, subunit III OS=Escherichia coli (strain B / BL21-DE3) OX=469008 GN=ECBD_3228 PE=3 SV=1
439	A0A140NF29	psiF	1	1	1	1	1	1.19312e-05	1.23665e-05	1.26435e-05		1.03648	1.0597	0.734989	0.779818	0.655104		PsiF repeat protein OS=Escherichia coli (strain B / BL21-DE3) OX=469008 GN=ECBD_3280 PE=4 SV=1
459	A0A140N6V5	yfeH	1	2	3	3	2	1.14281e-05	1.18451e-05	8.07357e-06		1.03648	0.706465	0.189637	0.556436	0.655104		Bile acid:sodium symporter OS=Escherichia coli (strain B / BL21-DE3) OX=469008 GN=ECBD_1273 PE=4 SV=1
416	A0A140N2F0	ugpC	3	2	3	3	5	1.06577e-05	1.10465e-05	1.88232e-05		1.03648	1.76616	0.999603	0.955919	0.655104		sn-glycerol-3-phosphate import ATP-binding protein UgpC OS=Escherichia coli (strain B / BL21-DE3) OX=469008 GN=ugpC PE=3 SV=1
430	A0A140N879	lysP	2	3	4	4	4	1.03453e-05	1.07227e-05	1.09629e-05		1.03648	1.0597	0.571668	0.779818	0.655104		Amino acid permease-associated region OS=Escherichia coli (strain B / BL21-DE3) OX=469008 GN=ECBD_1502 PE=4 SV=1
421	A0A140N5F3	bcr	1	1	3	3	4	9.58115e-06	9.9307e-06	1.35375e-05		1.03648	1.41293	0.734989	0.898978	0.655104		Bcr/CflA family efflux transporter OS=Escherichia coli (strain B / BL21-DE3) OX=469008 GN=ECBD_1475 PE=3 SV=1
471	A0A140N4J8	yfhH	2	1	2	2	1	8.96958e-06	9.29683e-06	4.75253e-06		1.03648	0.529849	0.351139	0.398904	0.655104		Transcriptional regulator, RpiR family OS=Escherichia coli (strain B / BL21-DE3) OX=469008 GN=ECBD_1121 PE=4 SV=1
432	A0A140ND93	zraR	2	3	3	3	3	8.60348e-06	8.91736e-06	9.11709e-06		1.03648	1.0597	0.503795	0.779818	0.655104		Two component, sigma54 specific, transcriptional regulator, Fis family OS=Escherichia coli (strain B / BL21-DE3) OX=469008 GN=ECBD_4028 PE=4 SV=1
428	A0A140NA75	mdlA	3	3	4	4	4	8.57431e-06	8.88714e-06	9.08618e-06		1.03648	1.0597	0.734989	0.779818	0.655104		ABC transporter related OS=Escherichia coli (strain B / BL21-DE3) OX=469008 GN=ECBD_3207 PE=4 SV=1
487	A0A140N529	yhaO	1	1	3	3	1	8.56464e-06	8.87711e-06	3.02531e-06		1.03648	0.353233	0.734989	0.223524	0.655104		Serine transporter OS=Escherichia coli (strain B / BL21-DE3) OX=469008 GN=ECBD_0629 PE=4 SV=1
469	A0A140NE58	iaaA	2	1	2	2	1	7.87982e-06	8.16731e-06	4.17512e-06		1.03648	0.529849	0.734989	0.398904	0.655104		Peptidase T2 asparaginase 2 OS=Escherichia coli (strain B / BL21-DE3) OX=469008 GN=ECBD_2795 PE=4 SV=1
441	A0A140N876	cybB	1	1	1	1	1	7.18586e-06	7.44803e-06	7.61484e-06		1.03648	1.0597	0.972162	0.779818	0.655104		Cytochrome B561 OS=Escherichia coli (strain B / BL21-DE3) OX=469008 GN=ECBD_2221 PE=4 SV=1
493	A0A140N5C8	yfhM	9	2	9	9	2	6.88591e-06	7.13713e-06	1.62155e-06		1.03648	0.235488	0.503795	0.113356	0.655104		Alpha-2-macroglobulin OS=Escherichia coli (strain B / BL21-DE3) OX=469008 GN=ECBD_1166 PE=3 SV=1
414	A0A140N7P7	yqiK	2	5	3	3	6	6.861e-06	7.11132e-06	1.45412e-05		1.03648	2.1194	0.503795	0.981423	0.655104		Band 7 protein OS=Escherichia coli (strain B / BL21-DE3) OX=469008 GN=ECBD_0690 PE=4 SV=1
442	A0A140N6P0	mtlR	1	1	1	1	1	6.4857e-06	6.72232e-06	6.87288e-06		1.03648	1.0597	0.972162	0.779818	0.655104		Mannitol repressor, MtlR OS=Escherichia coli (strain B / BL21-DE3) OX=469008 GN=ECBD_0127 PE=4 SV=1
435	A0A140N6C4	ygfA	1	1	1	1	1	6.32356e-06	6.55426e-06	6.70106e-06		1.03648	1.0597	0.734989	0.779818	0.655104		5-formyltetrahydrofolate cyclo-ligase OS=Escherichia coli (strain B / BL21-DE3) OX=469008 GN=ECBD_0826 PE=3 SV=1
418	A0A140NGL1	yjeP	4	8	5	5	8	5.71234e-06	5.92074e-06	9.68536e-06		1.03648	1.69552	0.445075	0.947802	0.655104		MscS Mechanosensitive ion channel OS=Escherichia coli (strain B / BL21-DE3) OX=469008 GN=ECBD_3872 PE=4 SV=1
467	A0A140N8E5	barA	2	2	4	4	2	5.51072e-06	5.71178e-06	2.91985e-06		1.03648	0.529849	0.909875	0.398904	0.655104		Histidine kinase OS=Escherichia coli (strain B / BL21-DE3) OX=469008 GN=ECBD_0943 PE=4 SV=1
415	A0A140N859	yegW	1	2	1	1	2	5.09964e-06	5.2857e-06	1.08082e-05		1.03648	2.1194	0.734989	0.981423	0.655104		Transcriptional regulator, GntR family OS=Escherichia coli (strain B / BL21-DE3) OX=469008 GN=ECBD_1556 PE=4 SV=1
443	A0A140N5L4	yqjG	1	1	1	1	1	3.85583e-06	3.9965e-06	4.08601e-06		1.03648	1.0597	0.972162	0.779818	0.655104		Glutathione transferase OS=Escherichia coli (strain B / BL21-DE3) OX=469008 GN=ECBD_0637 PE=4 SV=1
419	A0A140NCJ8	gmr	1	3	2	2	3	3.82666e-06	3.96627e-06	6.08266e-06		1.03648	1.58955	0.991896	0.932926	0.655104		Diguanylate cyclase/phosphodiesterase with PAS/PAC sensor(S) OS=Escherichia coli (strain B / BL21-DE3) OX=469008 GN=ECBD_2333 PE=4 SV=1
411	A0A140NGR5	sgcX	1	2	1	1	4	3.39065e-06	3.51435e-06	1.43722e-05		1.03648	4.23879	0.734989	0.999929	0.655104		Peptidase M42 family protein OS=Escherichia coli (strain B / BL21-DE3) OX=469008 GN=ECBD_3733 PE=3 SV=1
444	A0A140N840	agaA	1	1	1	1	1	3.35467e-06	3.47706e-06	3.55494e-06		1.03648	1.0597	0.734989	0.779818	0.655104		N-acetylglucosamine-6-phosphate deacetylase OS=Escherichia coli (strain B / BL21-DE3) OX=469008 GN=ECBD_0605 PE=3 SV=1
470	A0A140NBU7	dmsA	2	1	2	2	1	3.1074e-06	3.22077e-06	1.64645e-06		1.03648	0.529849	0.734989	0.398904	0.655104		Anaerobic dimethyl sulfoxide reductase, A subunit, DmsA/YnfE family OS=Escherichia coli (strain B / BL21-DE3) OX=469008 GN=ECBD_2701 PE=3 SV=1
436	A0A140N8L6	chbF	1	1	1	1	1	2.81047e-06	2.91301e-06	2.97825e-06		1.03648	1.0597	0.734989	0.779818	0.655104		Glycoside hydrolase family 4 OS=Escherichia coli (strain B / BL21-DE3) OX=469008 GN=ECBD_1911 PE=3 SV=1
412	A0A140N8K5	fliI	1	2	1	1	3	2.76742e-06	2.86839e-06	8.79789e-06		1.03648	3.17909	0.972162	0.99878	0.655104		ATPase, FliI/YscN family OS=Escherichia coli (strain B / BL21-DE3) OX=469008 GN=ECBD_1704 PE=4 SV=1
440	A0A140NEP0	cadC	1	1	1	1	1	2.47014e-06	2.56026e-06	2.6176e-06		1.03648	1.0597	0.999989	0.779818	0.655104		Transcriptional regulator, CadC OS=Escherichia coli (strain B / BL21-DE3) OX=469008 GN=ECBD_3897 PE=4 SV=1
445	A0A140ND29	flgK	1	1	1	1	1	2.31209e-06	2.39644e-06	2.45011e-06		1.03648	1.0597	0.734989	0.779818	0.655104		Flagellar hook-associated protein 1 OS=Escherichia coli (strain B / BL21-DE3) OX=469008 GN=flgK PE=3 SV=1
437	A0A140N7P8	uidA	1	1	1	1	1	2.09737e-06	2.17388e-06	2.22257e-06		1.03648	1.0597	0.734989	0.779818	0.655104		Beta-glucuronidase OS=Escherichia coli (strain B / BL21-DE3) OX=469008 GN=ECBD_2028 PE=3 SV=1
446	A0A140NEW9	nrdD	1	1	1	1	1	1.77628e-06	1.84109e-06	1.88232e-06		1.03648	1.0597	0.972162	0.779818	0.655104		Anaerobic ribonucleoside-triphosphate reductase OS=Escherichia coli (strain B / BL21-DE3) OX=469008 GN=ECBD_3796 PE=4 SV=1
413	A0A140NA73	ydbD	1	2	1	1	3	1.64676e-06	1.70684e-06	5.2352e-06		1.03648	3.17909	0.972162	0.99878	0.655104		Uncharacterized protein OS=Escherichia coli (strain B / BL21-DE3) OX=469008 GN=ECBD_2233 PE=4 SV=1
438	A0A140N9U8	acrD	1	1	1	1	1	1.21959e-06	1.26408e-06	1.29239e-06		1.03648	1.0597	0.997734	0.779818	0.655104		Efflux pump membrane transporter OS=Escherichia coli (strain B / BL21-DE3) OX=469008 GN=ECBD_1220 PE=3 SV=1
406	A0A140N6M3	gntK	5	4	38	38	35	0.000296661	0.000307484	0.000289552		1.03648	0.976038	0.496281	0.737839	0.655104		Gluconokinase OS=Escherichia coli (strain B / BL21-DE3) OX=469008 GN=ECBD_0306 PE=3 SV=1
612	A0A140N7T7	ybl97	18	12	79	79	63	0.000270033	0.000279885	0.000228198		1.03648	0.845076	0.52859	0.6589	0.655104		DegT/DnrJ/EryC1/StrS aminotransferase OS=Escherichia coli (strain B / BL21-DE3) OX=469008 GN=ECBD_1619 PE=3 SV=1
519	A0A140NB67	cedA	3	2	6	6	2	8.72215e-05	9.04036e-05	3.08095e-05		1.03648	0.353233	0.189637	0.223524	0.655104		Cell division activator CedA OS=Escherichia coli (strain B / BL21-DE3) OX=469008 GN=cedA PE=3 SV=1
502	A0A140N9F6	yoaC	1	1	6	6	7	7.09184e-05	7.35058e-05	8.76774e-05		1.03648	1.23631	0.351139	0.849717	0.655104		Uncharacterized protein OS=Escherichia coli (strain B / BL21-DE3) OX=469008 GN=ECBD_1832 PE=4 SV=1
509	A0A140N7Q7	rstA	7	6	13	13	10	6.87918e-05	7.13016e-05	5.60758e-05		1.03648	0.815152	0.0997359	0.638454	0.655104		Two component transcriptional regulator, winged helix family OS=Escherichia coli (strain B / BL21-DE3) OX=469008 GN=ECBD_2038 PE=4 SV=1
520	A0A140SS28	poxA	5	2	12	12	3	4.6697e-05	4.84007e-05	1.23712e-05		1.03648	0.264925	0.269906	0.139251	0.655104		Elongation factor P--(R)-beta-lysine ligase OS=Escherichia coli (strain B / BL21-DE3) OX=469008 GN=epmA PE=3 SV=1
162	A0A140N7P3	rpoN	6	6	16	16	21	4.24222e-05	4.39699e-05	5.90031e-05		1.03648	1.39085	0.766695	0.893758	0.655104		RNA polymerase sigma-54 factor OS=Escherichia coli (strain B / BL21-DE3) OX=469008 GN=ECBD_0540 PE=3 SV=1
168	A0A140N3M9	degS	7	4	10	10	13	3.56257e-05	3.69254e-05	4.90782e-05		1.03648	1.37761	0.887119	0.890509	0.655104		Periplasmic serine protease DegS OS=Escherichia coli (strain B / BL21-DE3) OX=469008 GN=ECBD_0512 PE=4 SV=1
518	A0A140NET9	proY	1	1	9	9	4	2.49068e-05	2.58155e-05	1.17305e-05		1.03648	0.470977	0.0237808	0.341253	0.655104		Amino acid permease-associated region OS=Escherichia coli (strain B / BL21-DE3) OX=469008 GN=ECBD_3259 PE=4 SV=1
521	A0A140N7N6	yqjH	3	1	5	5	1	2.48959e-05	2.58042e-05	5.27643e-06		1.03648	0.21194	0.0763837	0.0938202	0.655104		FAD-binding 9 siderophore-interacting domain protein OS=Escherichia coli (strain B / BL21-DE3) OX=469008 GN=ECBD_0672 PE=4 SV=1
503	A0A140N8H1	yqhA	2	2	3	3	3	2.3135e-05	2.3979e-05	2.45161e-05		1.03648	1.0597	0.869138	0.779818	0.655104		UPF0114 protein YqhA OS=Escherichia coli (strain B / BL21-DE3) OX=469008 GN=yqhA PE=3 SV=1
514	A0A140N427	folB	2	1	2	2	1	2.0733e-05	2.14894e-05	1.09853e-05		1.03648	0.529849	0.351139	0.398904	0.655104		7,8-dihydroneopterin aldolase OS=Escherichia coli (strain B / BL21-DE3) OX=469008 GN=ECBD_0683 PE=3 SV=1
497	A0A140N3V2	yraN	1	1	2	2	3	1.93086e-05	2.0013e-05	3.06919e-05		1.03648	1.58955	0.351139	0.932926	0.655104		UPF0102 protein YraN OS=Escherichia coli (strain B / BL21-DE3) OX=469008 GN=yraN PE=3 SV=1
513	A0A140NB31	ftsW	2	1	5	5	3	1.52743e-05	1.58316e-05	9.71168e-06		1.03648	0.635819	0.609201	0.496747	0.655104		Probable peptidoglycan glycosyltransferase FtsW OS=Escherichia coli (strain B / BL21-DE3) OX=469008 GN=ftsW PE=3 SV=1
510	A0A140NFZ3	yjjU	3	3	4	4	3	1.41704e-05	1.46874e-05	1.12623e-05		1.03648	0.794774	0.115353	0.624003	0.655104		Patatin OS=Escherichia coli (strain B / BL21-DE3) OX=469008 GN=ECBD_3643 PE=4 SV=1
504	A0A140NA63	maa	1	1	2	2	2	1.3822e-05	1.43263e-05	1.46471e-05		1.03648	1.0597	0.972162	0.779818	0.655104		Transferase hexapeptide repeat containing protein OS=Escherichia coli (strain B / BL21-DE3) OX=469008 GN=ECBD_3197 PE=4 SV=1
845	A0A140N6X6	bcsC	9	7	11	11	7	1.2024e-05	1.24627e-05	8.10846e-06		1.03648	0.674353	0.306953	0.529906	0.655104		Cellulose synthase operon C domain protein OS=Escherichia coli (strain B / BL21-DE3) OX=469008 GN=ECBD_0209 PE=4 SV=1
498	A0A140NB26	ydjF	2	2	2	2	3	1.00374e-05	1.04036e-05	1.59549e-05		1.03648	1.58955	0.734989	0.932926	0.655104		Transcriptional regulator, DeoR family OS=Escherichia coli (strain B / BL21-DE3) OX=469008 GN=ECBD_1874 PE=4 SV=1
511	A0A140NF28	codB	3	1	3	3	2	9.05521e-06	9.38558e-06	6.39719e-06		1.03648	0.706465	0.503795	0.556436	0.655104		NCS1 nucleoside transporter family OS=Escherichia coli (strain B / BL21-DE3) OX=469008 GN=ECBD_3321 PE=4 SV=1
517	A0A140NB88	ydiB	1	1	2	2	1	8.78272e-06	9.10314e-06	4.65351e-06		1.03648	0.529849	0.351139	0.398904	0.655104		Quinate/shikimate dehydrogenase OS=Escherichia coli (strain B / BL21-DE3) OX=469008 GN=ydiB PE=3 SV=1
515	A0A140N3N8	nanA	2	1	2	2	1	8.51657e-06	8.82729e-06	4.5125e-06		1.03648	0.529849	0.351139	0.398904	0.655104		N-acetylneuraminate lyase OS=Escherichia coli (strain B / BL21-DE3) OX=469008 GN=nanA PE=3 SV=1
496	A0A140NES9	trkH	2	1	2	2	3	5.2369e-06	5.42796e-06	8.3243e-06		1.03648	1.58955	0.734989	0.932926	0.655104		Trk system potassium uptake protein OS=Escherichia coli (strain B / BL21-DE3) OX=469008 GN=ECBD_4176 PE=3 SV=1
499	A0A140NB76	H	3	3	3	3	4	4.44799e-06	4.61027e-06	6.2847e-06		1.03648	1.41293	0.189637	0.898978	0.655104		Phage tail tape measure protein, lambda family OS=Escherichia coli (strain B / BL21-DE3) OX=469008 GN=ECBD_2860 PE=4 SV=1
516	A0A140N835	scpA	1	1	2	2	1	3.54261e-06	3.67186e-06	1.87705e-06		1.03648	0.529849	0.351139	0.398904	0.655104		Methylmalonyl-CoA mutase, large subunit OS=Escherichia coli (strain B / BL21-DE3) OX=469008 GN=ECBD_0821 PE=4 SV=1
506	A0A140N675	mltC	1	1	1	1	1	3.51309e-06	3.64126e-06	3.72281e-06		1.03648	1.0597	0.734989	0.779818	0.655104		Membrane-bound lytic murein transglycosylase C OS=Escherichia coli (strain B / BL21-DE3) OX=469008 GN=mltC PE=3 SV=1
505	A0A140NB53	yccS	1	1	1	1	1	1.75654e-06	1.82063e-06	1.86141e-06		1.03648	1.0597	0.734989	0.779818	0.655104		FUSC-like domain-containing protein OS=Escherichia coli (strain B / BL21-DE3) OX=469008 GN=ECBD_2634 PE=4 SV=1
453	A0A140NBN8	dacA	22	19	173	172	155	0.000542916	0.000559471	0.000515466		1.03049	0.949441	0.76443	0.723157	0.650858		Beta-lactamase OS=Escherichia coli (strain B / BL21-DE3) OX=469008 GN=ECBD_3019 PE=3 SV=1
296	A0A140N751	upp	17	12	172	171	183	0.00104582	0.00107767	0.00117913		1.03046	1.12747	0.868579	0.809448	0.650833		Uracil phosphoribosyltransferase OS=Escherichia coli (strain B / BL21-DE3) OX=469008 GN=upp PE=3 SV=1
364	A0A140N913	fabH	10	9	167	166	161	0.000666267	0.00068644	0.000680676		1.03028	1.02163	0.648512	0.761485	0.650705		3-oxoacyl-[acyl-carrier-protein] synthase 3 OS=Escherichia coli (strain B / BL21-DE3) OX=469008 GN=fabH PE=3 SV=1
915	A0A140NGE1	fbp	13	10	120	119	72	0.000457125	0.000469854	0.000290648		1.02785	0.635819	0.609201	0.496747	0.648971		Fructose-1,6-bisphosphatase class 1 OS=Escherichia coli (strain B / BL21-DE3) OX=469008 GN=fbp PE=3 SV=1
569	A0A140NF74	metL	26	24	107	106	89	0.000167067	0.000171544	0.000147258		1.0268	0.881431	0.686756	0.682513	0.648221		Bifunctional aspartokinase/homoserine dehydrogenase OS=Escherichia coli (strain B / BL21-DE3) OX=469008 GN=ECBD_4083 PE=3 SV=1
291	A0A140SS95	metE	22	24	103	102	110	0.000172995	0.000177566	0.000195781		1.02642	1.13172	0.782813	0.811183	0.647952		5-methyltetrahydropteroyltriglutamate--homocysteine methyltransferase OS=Escherichia coli (strain B / BL21-DE3) OX=469008 GN=metE PE=3 SV=1
558	A0A140N7J1	rplB	23	22	1332	1318	1119	0.00617068	0.00632858	0.0054934		1.02559	0.890242	0.73699	0.688036	0.647357		50S ribosomal protein L2 OS=Escherichia coli (strain B / BL21-DE3) OX=469008 GN=rplB PE=3 SV=1
265	A0A140NF01	rho	39	36	1177	1163	1291	0.00355266	0.00363848	0.00412939		1.02416	1.16234	0.799049	0.823283	0.646328		Transcription termination factor Rho OS=Escherichia coli (strain B / BL21-DE3) OX=469008 GN=rho PE=3 SV=1
633	A0A140N983	argS	39	34	298	294	232	0.000653178	0.000667921	0.000538872		1.02257	0.825	0.718425	0.645284	0.64519		Arginine--tRNA ligase OS=Escherichia coli (strain B / BL21-DE3) OX=469008 GN=argS PE=3 SV=1
338	A0A140N996	aspS	42	35	297	293	297	0.000636643	0.000650983	0.000674649		1.02252	1.0597	0.77061	0.779818	0.645156		Aspartate--tRNA ligase OS=Escherichia coli (strain B / BL21-DE3) OX=469008 GN=aspS PE=3 SV=1
264	A0A140ND72	atpA	32	32	886	874	974	0.00218428	0.0022333	0.00254457		1.02245	1.16495	0.770264	0.824283	0.645099		ATP synthase subunit alpha OS=Escherichia coli (strain B / BL21-DE3) OX=469008 GN=atpA PE=3 SV=1
527	A0A140SSB8	hemX	19	15	72	71	62	0.00022708	0.000232096	0.000207215		1.02209	0.912518	0.651736	0.701653	0.644842		Uroporphyrinogen-III C-methyltransferase OS=Escherichia coli (strain B / BL21-DE3) OX=469008 GN=ECBD_4239 PE=4 SV=1
630	A0A140N6M4	rfaD	19	18	210	207	164	0.00085674	0.000875311	0.000709016		1.02168	0.827574	0.740042	0.647053	0.644546		ADP-L-glycero-D-manno-heptose-6-epimerase OS=Escherichia coli (strain B / BL21-DE3) OX=469008 GN=hldD PE=3 SV=1
321	A0A140N4K1	rpsC	26	25	1323	1304	1341	0.00718117	0.00733627	0.00771341		1.0216	1.07412	0.762787	0.786437	0.644489		30S ribosomal protein S3 OS=Escherichia coli (strain B / BL21-DE3) OX=469008 GN=rpsC PE=3 SV=1
655	A0A140NDR8	ubiE	9	7	69	68	53	0.00034767	0.000355131	0.000282993		1.02146	0.813971	0.551702	0.637628	0.644391		Ubiquinone/menaquinone biosynthesis C-methyltransferase UbiE OS=Escherichia coli (strain B / BL21-DE3) OX=469008 GN=ubiE PE=3 SV=1
546	A0A140NB75	hemB	18	14	68	67	58	0.000265433	0.000271071	0.000239915		1.02124	0.90386	0.61557	0.696419	0.644232		Delta-aminolevulinic acid dehydratase OS=Escherichia coli (strain B / BL21-DE3) OX=469008 GN=ECBD_3292 PE=3 SV=1
801	A0A140N692	yiaF	12	9	62	61	41	0.000332255	0.000338822	0.000232833		1.01977	0.700768	0.636571	0.551804	0.643168		Uncharacterized protein OS=Escherichia coli (strain B / BL21-DE3) OX=469008 GN=ECBD_0183 PE=4 SV=1
409	A0A140N9D5	iscS	28	27	473	465	435	0.00148071	0.00150878	0.00144305		1.01895	0.974564	0.785736	0.737043	0.64258		Cysteine desulfurase IscS OS=Escherichia coli (strain B / BL21-DE3) OX=469008 GN=iscS PE=3 SV=1
212	A0A140SS63	rplL	20	17	1753	1718	2067	0.0183226	0.0186119	0.0228944		1.01579	1.24951	0.706995	0.854041	0.640288		50S ribosomal protein L7/L12 OS=Escherichia coli (strain B / BL21-DE3) OX=469008 GN=rplL PE=3 SV=1
235	A0A140NAP2	potA	12	14	50	49	57	0.00016729	0.000169925	0.000202095		1.01575	1.20806	0.724113	0.840069	0.640262		Spermidine/putrescine import ATP-binding protein PotA OS=Escherichia coli (strain B / BL21-DE3) OX=469008 GN=potA PE=3 SV=1
465	A0A140NGH2	yjjK	36	35	367	359	324	0.000836305	0.000847921	0.000782394		1.01389	0.935537	0.723117	0.715214	0.638907		ABC transporter related OS=Escherichia coli (strain B / BL21-DE3) OX=469008 GN=ECBD_3629 PE=4 SV=1
1048	A0A140NA37	ycgL	11	8	45	44	23	0.000586722	0.000594614	0.000317782		1.01345	0.541623	0.275338	0.410198	0.638587		Protein YcgL OS=Escherichia coli (strain B / BL21-DE3) OX=469008 GN=ycgL PE=3 SV=1
586	A0A140NHX7	yihI	9	8	45	44	37	0.000336757	0.000341287	0.000293419		1.01345	0.871307	0.65542	0.676072	0.638587		Der GTPase-activating protein YihI OS=Escherichia coli (strain B / BL21-DE3) OX=469008 GN=yihI PE=3 SV=1
825	A0A140N5A9	nfuA	9	8	132	129	85	0.000874041	0.00088534	0.00059643		1.01293	0.682381	0.351139	0.536634	0.638205		Fe/S biogenesis protein NfuA OS=Escherichia coli (strain B / BL21-DE3) OX=469008 GN=nfuA PE=3 SV=1
688	A0A140SSB1	rsmG	12	9	88	86	65	0.000537655	0.000544605	0.00042084		1.01293	0.782732	0.597524	0.615262	0.638205		Ribosomal RNA small subunit methyltransferase G OS=Escherichia coli (strain B / BL21-DE3) OX=469008 GN=rsmG PE=3 SV=1
451	A0A140N5X0	murA	19	16	128	125	115	0.000386356	0.000391066	0.000367839		1.01219	0.952073	0.69978	0.724639	0.637668		UDP-N-acetylglucosamine 1-carboxyvinyltransferase OS=Escherichia coli (strain B / BL21-DE3) OX=469008 GN=murA PE=3 SV=1
755	A0A140NBV2	uvrB	14	11	42	41	29	7.8927e-05	7.98588e-05	5.77506e-05		1.01181	0.731696	0.543376	0.576556	0.637387		UvrABC system protein B OS=Escherichia coli (strain B / BL21-DE3) OX=469008 GN=uvrB PE=3 SV=1
481	A0A140NE35	guaC	12	9	41	40	36	0.000149433	0.000151107	0.000139042		1.0112	0.930467	0.646745	0.712271	0.636947		GMP reductase OS=Escherichia coli (strain B / BL21-DE3) OX=469008 GN=guaC PE=3 SV=1
370	A0A140NBC5	gdhA	19	17	76	74	73	0.000215029	0.000217009	0.000218871		1.00921	1.01787	0.819212	0.759607	0.635487		Glutamate dehydrogenase OS=Escherichia coli (strain B / BL21-DE3) OX=469008 GN=ECBD_1883 PE=3 SV=1
310	A0A140N3N3	trmI	7	7	35	34	36	0.000185209	0.000186481	0.000201873		1.00687	1.08998	0.685773	0.793517	0.633772		tRNA (guanine-N(7)-)-methyltransferase OS=Escherichia coli (strain B / BL21-DE3) OX=469008 GN=trmB PE=3 SV=1
1303	A0A140NG76	murC	15	7	70	68	26	0.000180305	0.000181544	7.09685e-05		1.00687	0.393602	0.470686	0.263792	0.633772		UDP-N-acetylmuramate--L-alanine ligase OS=Escherichia coli (strain B / BL21-DE3) OX=469008 GN=murC PE=3 SV=1
1387	A0A140NC71	ybiB	12	6	35	34	11	0.000138328	0.000139278	4.60698e-05		1.00687	0.333048	0.418858	0.203658	0.633772		Glycosyl transferase, family 3-like protein OS=Escherichia coli (strain B / BL21-DE3) OX=469008 GN=ECBD_2823 PE=4 SV=1
356	A0A140N7K3	accD	20	18	242	235	236	0.00100678	0.00101332	0.00104043		1.0065	1.03342	0.704945	0.767302	0.633502		Acetyl-coenzyme A carboxylase carboxyl transferase subunit beta OS=Escherichia coli (strain B / BL21-DE3) OX=469008 GN=accD PE=3 SV=1
624	A0A140N582	mreB	18	14	238	231	187	0.000867439	0.000872642	0.000722247		1.006	0.83262	0.626013	0.650501	0.633132		Cell shape determining protein, MreB/Mrl family OS=Escherichia coli (strain B / BL21-DE3) OX=469008 GN=ECBD_0496 PE=4 SV=1
294	A0A140N810	tktA	35	35	840	815	894	0.00160235	0.00161138	0.00180716		1.00564	1.12782	0.729855	0.809593	0.632864		Transketolase OS=Escherichia coli (strain B / BL21-DE3) OX=469008 GN=ECBD_0803 PE=3 SV=1
699	A0A140N5T6	pdxB	21	18	134	130	98	0.000448337	0.000450822	0.000347462		1.00554	0.775003	0.649799	0.609573	0.632797		Erythronate-4-phosphate dehydrogenase OS=Escherichia coli (strain B / BL21-DE3) OX=469008 GN=pdxB PE=3 SV=1
614	A0A140NFU3	rpsT	9	8	625	606	496	0.00908557	0.00913077	0.00764075		1.00497	0.840976	0.709195	0.656153	0.632377		30S ribosomal protein S20 OS=Escherichia coli (strain B / BL21-DE3) OX=469008 GN=rpsT PE=3 SV=1
222	A0A140NCH9	hns	14	15	815	790	948	0.00752365	0.00755893	0.00927388		1.00469	1.23263	0.764365	0.84849	0.632168		DNA-binding protein OS=Escherichia coli (strain B / BL21-DE3) OX=469008 GN=ECBD_2385 PE=3 SV=1
529	A0A140N9R6	rnb	24	22	194	188	167	0.000380984	0.000382671	0.00034754		1.00443	0.912214	0.796768	0.701471	0.631974		Exoribonuclease 2 OS=Escherichia coli (strain B / BL21-DE3) OX=469008 GN=rnb PE=3 SV=1
216	A0A140N2U0	rpoA	29	28	997	966	1168	0.00383258	0.00384889	0.00475796		1.00426	1.24145	0.78381	0.851414	0.631848		DNA-directed RNA polymerase subunit alpha OS=Escherichia coli (strain B / BL21-DE3) OX=469008 GN=rpoA PE=3 SV=1
261	A0A140N932	pyrG	31	30	526	509	579	0.00122062	0.00122426	0.00142382		1.00299	1.16647	0.776669	0.824864	0.63091		CTP synthase OS=Escherichia coli (strain B / BL21-DE3) OX=469008 GN=pyrG PE=3 SV=1
579	A0A140NCQ6	purB	26	26	231	223	191	0.000640676	0.000641053	0.000561361		1.00059	0.876201	0.5874	0.679198	0.629137		Adenylosuccinate lyase OS=Escherichia coli (strain B / BL21-DE3) OX=469008 GN=ECBD_2468 PE=3 SV=1
305	A0A140NBN7	tyrS	20	20	316	305	331	0.000942568	0.000942948	0.00104625		1.0004	1.11	0.746617	0.802165	0.629		Tyrosine--tRNA ligase OS=Escherichia coli (strain B / BL21-DE3) OX=469008 GN=tyrS PE=3 SV=1
254	A0A140NFX6	yidC	14	15	195	188	216	0.000450034	0.000449709	0.000528259		0.999277	1.17382	0.723829	0.82764	0.628164		Membrane protein insertase YidC OS=Escherichia coli (strain B / BL21-DE3) OX=469008 GN=yidC PE=3 SV=1
571	A0A140N3G7	rplC	26	24	1206	1160	1002	0.00729781	0.00727555	0.00642532		0.996949	0.880446	0.668797	0.681891	0.626434		50S ribosomal protein L3 OS=Escherichia coli (strain B / BL21-DE3) OX=469008 GN=rplC PE=3 SV=1
550	A0A140NGF3	mog	7	5	26	25	22	0.000168628	0.000168058	0.000151203		0.996619	0.896668	0.614757	0.692014	0.626188		Molybdenum cofactor synthesis domain protein OS=Escherichia coli (strain B / BL21-DE3) OX=469008 GN=ECBD_3609 PE=4 SV=1
369	A0A140NCY4	hflD	9	5	26	25	25	0.000154378	0.000153856	0.000157302		0.996619	1.01894	0.667119	0.760145	0.626188		High frequency lysogenization protein HflD OS=Escherichia coli (strain B / BL21-DE3) OX=469008 GN=hflD PE=3 SV=1
976	A0A140N562	nadB	16	9	52	50	29	0.000121787	0.000121375	7.19744e-05		0.996619	0.590986	0.586393	0.456459	0.626188		L-aspartate oxidase OS=Escherichia coli (strain B / BL21-DE3) OX=469008 GN=ECBD_1106 PE=3 SV=1
1181	A0A140N8J7	rfbD	7	3	25	24	11	0.000105745	0.000105219	4.93055e-05		0.995024	0.466267	0.689268	0.336572	0.624999		dTDP-4-dehydrorhamnose reductase OS=Escherichia coli (strain B / BL21-DE3) OX=469008 GN=ECBD_1615 PE=3 SV=1
877	A0A140N7A5	ndk	7	7	274	263	169	0.00242329	0.00241087	0.00158389		0.994873	0.653609	0.632013	0.512231	0.624886		Nucleoside diphosphate kinase OS=Escherichia coli (strain B / BL21-DE3) OX=469008 GN=ndk PE=3 SV=1
735	A0A140N5D7	rplU	8	8	323	310	228	0.00396604	0.00394528	0.00296668		0.994768	0.748022	0.696441	0.58923	0.624808		50S ribosomal protein L21 OS=Escherichia coli (strain B / BL21-DE3) OX=469008 GN=rplU PE=3 SV=1
719	A0A140N998	rnc	10	11	49	47	35	0.000274207	0.000272611	0.000207555		0.994178	0.756927	0.591123	0.596027	0.624367		Ribonuclease 3 OS=Escherichia coli (strain B / BL21-DE3) OX=469008 GN=rnc PE=3 SV=1
242	A0A140NB77	pps	41	44	416	399	467	0.000664293	0.000660392	0.000790251		0.994127	1.18961	0.677802	0.833477	0.624329		Phosphoenolpyruvate synthase OS=Escherichia coli (strain B / BL21-DE3) OX=469008 GN=ECBD_1944 PE=3 SV=1
866	A0A140NFD8	nusB	10	9	48	46	30	0.000436735	0.000433807	0.000289254		0.993297	0.662311	0.410551	0.519695	0.623708		Transcription antitermination protein NusB OS=Escherichia coli (strain B / BL21-DE3) OX=469008 GN=nusB PE=3 SV=1
559	A0A140N770	dapA	10	8	118	113	99	0.000511082	0.000507282	0.000454387		0.992565	0.889069	0.711513	0.687305	0.623161		4-hydroxy-tetrahydrodipicolinate synthase OS=Escherichia coli (strain B / BL21-DE3) OX=469008 GN=dapA PE=3 SV=1
1099	A0A140SS43	gltP	7	5	23	22	11	6.65638e-05	6.59926e-05	3.37353e-05		0.991419	0.506812	0.413084	0.37656	0.622302		Proton/glutamate-aspartate symporter OS=Escherichia coli (strain B / BL21-DE3) OX=469008 GN=gltP PE=3 SV=1
814	A0A140N8U1	nhaB	4	1	23	22	15	5.67025e-05	5.62159e-05	3.91875e-05		0.991419	0.691107	0.710878	0.543875	0.622302		Na(+)/H(+) antiporter NhaB OS=Escherichia coli (strain B / BL21-DE3) OX=469008 GN=nhaB PE=3 SV=1
452	A0A140NDE6	accA	26	17	273	261	245	0.00108234	0.00107252	0.00102932		0.990924	0.951011	0.658795	0.724042	0.621931		Acetyl-coenzyme A carboxylase carboxyl transferase subunit alpha OS=Escherichia coli (strain B / BL21-DE3) OX=469008 GN=accA PE=3 SV=1
1323	A0A140N4F6	rpiA	11	8	113	108	41	0.000652568	0.000646448	0.000250907		0.990622	0.384492	0.184112	0.254665	0.621704		Ribose-5-phosphate isomerase A OS=Escherichia coli (strain B / BL21-DE3) OX=469008 GN=rpiA PE=3 SV=1
787	A0A140NCU1	fabD	12	10	180	172	121	0.000736725	0.000729666	0.000524808		0.990418	0.712353	0.45511	0.561189	0.621551		Malonyl CoA-acyl carrier protein transacylase OS=Escherichia coli (strain B / BL21-DE3) OX=469008 GN=ECBD_2509 PE=3 SV=1
543	A0A140N899	zwf	28	27	220	210	188	0.000566673	0.00056065	0.000513157		0.989371	0.90556	0.578674	0.697453	0.620764		Glucose-6-phosphate 1-dehydrogenase OS=Escherichia coli (strain B / BL21-DE3) OX=469008 GN=zwf PE=3 SV=1
480	A0A140NHC7	typA	28	28	501	478	440	0.00104386	0.00103227	0.000971488		0.988901	0.930673	0.758608	0.712392	0.620411		GTP-binding protein TypA OS=Escherichia coli (strain B / BL21-DE3) OX=469008 GN=ECBD_4156 PE=4 SV=1
555	A0A140N4N4	pepB	22	18	170	162	143	0.000503515	0.000497326	0.00044883		0.987708	0.891393	0.621861	0.688752	0.619513		Peptidase B OS=Escherichia coli (strain B / BL21-DE3) OX=469008 GN=pepB PE=3 SV=1
974	A0A140N729	dcrB	8	7	84	80	47	0.000574247	0.000566855	0.000340486		0.987127	0.592926	0.523845	0.458239	0.619075		Uncharacterized protein OS=Escherichia coli (strain B / BL21-DE3) OX=469008 GN=ECBD_0269 PE=4 SV=1
339	A0A140N9G6	bamD	14	15	105	100	105	0.000542019	0.000535042	0.000574377		0.987127	1.0597	0.609201	0.779818	0.619075		Outer membrane protein assembly factor BamD OS=Escherichia coli (strain B / BL21-DE3) OX=469008 GN=bamD PE=3 SV=1
876	A0A140NG58	pdhR	7	3	42	40	26	0.000209125	0.000206433	0.000137187		0.987127	0.656004	0.562373	0.514292	0.619075		Regulatory protein GntR HTH OS=Escherichia coli (strain B / BL21-DE3) OX=469008 GN=ECBD_3506 PE=4 SV=1
589	A0A140NDW4	ybgC	6	2	21	20	4	0.000198201	0.00019565	4.00063e-05		0.987127	0.201847	0.708491	0.0858226	0.619075		Tol-pal system-associated acyl-CoA thioesterase OS=Escherichia coli (strain B / BL21-DE3) OX=469008 GN=ECBD_2924 PE=4 SV=1
1100	A0A140N7A8	yfeX	10	7	42	40	20	0.000177652	0.000175365	8.96463e-05		0.987127	0.504618	0.235133	0.374416	0.619075		Dyp-type peroxidase family OS=Escherichia coli (strain B / BL21-DE3) OX=469008 GN=ECBD_1251 PE=4 SV=1
888	A0A140N738	ftsX	9	4	41	39	25	0.00014731	0.000145237	9.51855e-05		0.985923	0.646157	0.646745	0.505781	0.618167		Cell division protein FtsX OS=Escherichia coli (strain B / BL21-DE3) OX=469008 GN=ECBD_0279 PE=3 SV=1
878	A0A140SSC4	mnmG	27	21	143	136	88	0.000287526	0.000283428	0.000187502		0.985747	0.652122	0.591658	0.510947	0.618033		tRNA uridine 5-carboxymethylaminomethyl modification enzyme MnmG OS=Escherichia coli (strain B / BL21-DE3) OX=469008 GN=mnmG PE=3 SV=1
924	A0A140NAA1	rne	49	42	447	425	267	0.000532824	0.000525082	0.000337264		0.985471	0.632974	0.546472	0.494243	0.617825		Ribonuclease E OS=Escherichia coli (strain B / BL21-DE3) OX=469008 GN=rne PE=3 SV=1
1168	A0A140N9D9	gpmA	19	13	262	249	117	0.00132542	0.00130561	0.000627219		0.985055	0.473224	0.481816	0.343483	0.617511		2,3-bisphosphoglycerate-dependent phosphoglycerate mutase OS=Escherichia coli (strain B / BL21-DE3) OX=469008 GN=gpmA PE=3 SV=1
676	A0A140NCQ8	tatE	4	2	20	19	15	0.000377526	0.000371734	0.000300048		0.984659	0.794774	0.351139	0.624003	0.617212		Probable Sec-independent protein translocase protein TatE OS=Escherichia coli (strain B / BL21-DE3) OX=469008 GN=tatE PE=3 SV=1
916	A0A140N6T0	smpA	3	2	20	19	12	0.000223843	0.000220409	0.000142323		0.984659	0.635819	0.707111	0.496747	0.617212		Outer membrane protein assembly factor BamE OS=Escherichia coli (strain B / BL21-DE3) OX=469008 GN=bamE PE=3 SV=1
349	A0A140NBS1	rplT	14	14	612	581	607	0.00655935	0.00645428	0.00689414		0.983982	1.05104	0.740189	0.775759	0.616699		50S ribosomal protein L20 OS=Escherichia coli (strain B / BL21-DE3) OX=469008 GN=rplT PE=3 SV=1
640	A0A140N7A0	nrdB	20	17	138	131	107	0.000464176	0.000456707	0.00038139		0.983908	0.82165	0.652539	0.642972	0.616643		Ribonucleotide reductase OS=Escherichia coli (strain B / BL21-DE3) OX=469008 GN=ECBD_1425 PE=4 SV=1
749	A0A140NBN5	fabA	11	11	137	130	95	0.00100736	0.000990761	0.000740234		0.983525	0.734827	0.637056	0.579008	0.616353		3-hydroxydecanoyl-[acyl-carrier-protein] dehydratase OS=Escherichia coli (strain B / BL21-DE3) OX=469008 GN=fabA PE=3 SV=1
750	A0A140NAM8	proB	14	15	137	130	95	0.000472113	0.000464335	0.000346921		0.983525	0.734827	0.666215	0.579008	0.616353		Glutamate 5-kinase OS=Escherichia coli (strain B / BL21-DE3) OX=469008 GN=proB PE=3 SV=1
374	A0A140NDE3	ompA	15	16	113	107	108	0.000413042	0.000405379	0.000418332		0.981449	1.01281	0.762141	0.757059	0.614779		OmpA domain protein transmembrane region-containing protein OS=Escherichia coli (strain B / BL21-DE3) OX=469008 GN=ECBD_2638 PE=3 SV=1
302	A0A140NAZ8	speE	6	6	91	86	96	0.000399614	0.000391435	0.000446737		0.979534	1.11792	0.763042	0.805498	0.613323		Polyamine aminopropyltransferase OS=Escherichia coli (strain B / BL21-DE3) OX=469008 GN=speE PE=3 SV=1
1066	A0A140NC00	ydgJ	9	3	18	17	9	6.57942e-05	6.44061e-05	3.4861e-05		0.978901	0.529849	0.45511	0.398904	0.612841		Oxidoreductase domain protein OS=Escherichia coli (strain B / BL21-DE3) OX=469008 GN=ECBD_2021 PE=4 SV=1
523	A0A140N8Q9	asnS	29	24	484	457	418	0.00131356	0.00128554	0.00120216		0.978663	0.915194	0.767439	0.703256	0.61266		Asparagine--tRNA ligase OS=Escherichia coli (strain B / BL21-DE3) OX=469008 GN=asnS PE=3 SV=1
816	A0A140NE88	rsmA	12	9	86	81	56	0.000398407	0.000388934	0.000274915		0.976223	0.690036	0.417316	0.54299	0.610797		Ribosomal RNA small subunit methyltransferase A OS=Escherichia coli (strain B / BL21-DE3) OX=469008 GN=rsmA PE=3 SV=1
1454	A0A140NDP0	moaD	1	1	17	16	5	0.000265433	0.000258934	8.27292e-05		0.975514	0.311676	0.265116	0.182936	0.610255		Molybdopterin converting factor, subunit 1 OS=Escherichia coli (strain B / BL21-DE3) OX=469008 GN=ECBD_2839 PE=4 SV=1
388	A0A140NAJ6	asmA	11	8	17	16	16	3.48462e-05	3.39929e-05	3.47543e-05		0.975514	0.997363	0.791933	0.749136	0.610255		AsmA family protein OS=Escherichia coli (strain B / BL21-DE3) OX=469008 GN=ECBD_1591 PE=4 SV=1
308	A0A140SS80	rpoB	109	95	1812	1705	1874	0.00170764	0.00166543	0.0018715		0.975278	1.09596	0.724186	0.796134	0.610075		DNA-directed RNA polymerase subunit beta OS=Escherichia coli (strain B / BL21-DE3) OX=469008 GN=rpoB PE=3 SV=1
461	A0A140N683	rpoD	33	32	321	302	285	0.000662271	0.000645803	0.0006231		0.975134	0.940853	0.652944	0.718273	0.609965		RNA polymerase sigma factor RpoD OS=Escherichia coli (strain B / BL21-DE3) OX=469008 GN=rpoD PE=3 SV=1
1219	A0A140N5B7	iscA	7	3	50	47	21	0.000590987	0.000575795	0.000263032		0.974295	0.445073	0.331765	0.315426	0.609322		Iron-binding protein IscA OS=Escherichia coli (strain B / BL21-DE3) OX=469008 GN=iscA PE=3 SV=1
602	A0A140NF41	atpG	25	22	249	234	201	0.00109726	0.00106878	0.000938616		0.974045	0.855419	0.701116	0.665754	0.60913		ATP synthase gamma chain OS=Escherichia coli (strain B / BL21-DE3) OX=469008 GN=atpG PE=3 SV=1
912	A0A140N942	der	29	23	214	201	129	0.000552343	0.000537717	0.000352831		0.97352	0.63879	0.580656	0.499353	0.608728		GTPase Der OS=Escherichia coli (strain B / BL21-DE3) OX=469008 GN=der PE=3 SV=1
886	A0A140NDW1	pflA	9	8	49	46	30	0.000251914	0.000245119	0.000163441		0.973025	0.648795	0.341271	0.508069	0.608348		Pyruvate formate-lyase-activating enzyme OS=Escherichia coli (strain B / BL21-DE3) OX=469008 GN=ECBD_2693 PE=3 SV=1
1013	A0A140N5R7	yqiC	9	9	63	59	34	0.000829967	0.000805628	0.000474659		0.970675	0.571901	0.32806	0.438793	0.606542		Uncharacterized protein OS=Escherichia coli (strain B / BL21-DE3) OX=469008 GN=ECBD_0697 PE=4 SV=1
1117	A0A140N421	yhiR	13	8	47	44	22	0.000212291	0.000205991	0.000105302		0.970325	0.496029	0.550715	0.365999	0.606273		Ribosomal RNA large subunit methyltransferase J OS=Escherichia coli (strain B / BL21-DE3) OX=469008 GN=rlmJ PE=3 SV=1
581	A0A140N6C6	lepA	27	22	263	246	217	0.000555291	0.000538347	0.000485519		0.969487	0.874352	0.579719	0.67802	0.605627		Elongation factor 4 OS=Escherichia coli (strain B / BL21-DE3) OX=469008 GN=lepA PE=3 SV=1
606	A0A140N896	rluC	16	15	61	57	49	0.000241841	0.000234228	0.000205863		0.968517	0.851233	0.726101	0.662994	0.60488		Pseudouridine synthase OS=Escherichia coli (strain B / BL21-DE3) OX=469008 GN=ECBD_2515 PE=3 SV=1
1120	A0A140N448	zntA	12	7	30	28	14	5.18324e-05	5.01419e-05	2.56325e-05		0.967385	0.494526	0.53172	0.364522	0.604005		Heavy metal translocating P-type ATPase OS=Escherichia coli (strain B / BL21-DE3) OX=469008 GN=ECBD_0272 PE=3 SV=1
1047	A0A140NE11	nfsA	10	11	103	96	53	0.000542772	0.000524341	0.000295964		0.966043	0.545282	0.569784	0.413688	0.602967		Nitroreductase OS=Escherichia coli (strain B / BL21-DE3) OX=469008 GN=ECBD_2743 PE=3 SV=1
826	A0A140NEK7	gsk	12	10	73	68	47	0.000212728	0.000205387	0.000145138		0.965492	0.682271	0.552812	0.536542	0.602541		Inosine kinase OS=Escherichia coli (strain B / BL21-DE3) OX=469008 GN=ECBD_3179 PE=4 SV=1
899	A0A140NCW6	pyrF	12	12	84	78	51	0.00040089	0.000385836	0.000257928		0.962449	0.643388	0.483246	0.503371	0.60018		Orotidine 5'-phosphate decarboxylase OS=Escherichia coli (strain B / BL21-DE3) OX=469008 GN=pyrF PE=3 SV=1
1200	A0A140NCG3	yjaG	4	3	28	26	12	0.000180673	0.000173889	8.20538e-05		0.962449	0.454156	0.146064	0.324504	0.60018		Uncharacterized protein OS=Escherichia coli (strain B / BL21-DE3) OX=469008 GN=ECBD_4033 PE=4 SV=1
694	A0A140N5D2	mrcA	29	22	98	91	72	0.000145814	0.000140338	0.000113524		0.962449	0.778554	0.642199	0.612194	0.60018		Penicillin-binding protein, 1A family OS=Escherichia coli (strain B / BL21-DE3) OX=469008 GN=ECBD_0351 PE=4 SV=1
623	A0A140N621	coaD	7	3	14	13	4	0.000111358	0.000107177	3.3716e-05		0.962449	0.302771	0.598727	0.174422	0.60018		Phosphopantetheine adenylyltransferase OS=Escherichia coli (strain B / BL21-DE3) OX=469008 GN=coaD PE=3 SV=1
391	A0A140N626	gyrA	45	40	304	282	285	0.000439397	0.000422469	0.000436526		0.961475	0.993467	0.727874	0.747103	0.599422		DNA gyrase subunit A OS=Escherichia coli (strain B / BL21-DE3) OX=469008 GN=gyrA PE=3 SV=1
1029	A0A140ND30	murD	10	8	55	51	29	0.000158811	0.000152634	8.87355e-05		0.961103	0.55875	0.461447	0.426455	0.599133		UDP-N-acetylmuramoylalanine--D-glutamate ligase OS=Escherichia coli (strain B / BL21-DE3) OX=469008 GN=murD PE=3 SV=1
526	A0A140N9F7	ydgA	24	23	123	114	106	0.000309879	0.000297684	0.000282993		0.960643	0.913236	0.652187	0.702084	0.598775		Uncharacterized protein OS=Escherichia coli (strain B / BL21-DE3) OX=469008 GN=ECBD_2032 PE=4 SV=1
908	A0A140NCA6	thiI	15	10	81	75	49	0.000212534	0.000203971	0.000136246		0.959707	0.641052	0.583513	0.501332	0.598045		tRNA sulfurtransferase OS=Escherichia coli (strain B / BL21-DE3) OX=469008 GN=thiI PE=3 SV=1
252	A0A140N9G9	fabB	17	16	418	387	465	0.00130209	0.00124951	0.00153497		0.959615	1.17885	0.792789	0.829519	0.597973		Beta-ketoacyl synthase OS=Escherichia coli (strain B / BL21-DE3) OX=469008 GN=ECBD_1336 PE=3 SV=1
642	A0A140N800	yqgF	7	4	40	37	31	0.000366583	0.00035146	0.000301062		0.958747	0.821266	0.707111	0.642706	0.597296		Putative pre-16S rRNA nuclease OS=Escherichia coli (strain B / BL21-DE3) OX=469008 GN=yqgF PE=3 SV=1
402	A0A140N6J8	galF	9	11	40	37	37	0.000170331	0.000163305	0.000166962		0.958747	0.980221	0.660891	0.740088	0.597296		Regulatory protein GalF OS=Escherichia coli (strain B / BL21-DE3) OX=469008 GN=ECBD_1613 PE=4 SV=1
650	A0A140NAB7	glnS	38	29	333	308	257	0.000760197	0.000728777	0.000621723		0.95867	0.817845	0.627625	0.640332	0.597235		Glutamine--tRNA ligase OS=Escherichia coli (strain B / BL21-DE3) OX=469008 GN=glnS PE=1 SV=1
962	A0A140N9R2	purM	8	9	53	49	30	0.000194289	0.000186179	0.00011654		0.958258	0.599829	0.213501	0.464544	0.596914		Phosphoribosylformylglycinamidine cyclo-ligase OS=Escherichia coli (strain B / BL21-DE3) OX=469008 GN=purM PE=3 SV=1
545	A0A140NAF9	lipA	20	16	198	183	169	0.000780102	0.000747308	0.000705595		0.957962	0.90449	0.679428	0.696802	0.596683		Lipoyl synthase OS=Escherichia coli (strain B / BL21-DE3) OX=469008 GN=lipA PE=3 SV=1
945	A0A140NAM6	yecJ	4	5	26	24	15	0.000396175	0.000379042	0.000242207		0.956754	0.611364	0.614757	0.47499	0.595738		Uncharacterized protein OS=Escherichia coli (strain B / BL21-DE3) OX=469008 GN=ECBD_1738 PE=4 SV=1
938	A0A140ND46	pyrC	12	9	104	96	61	0.00037796	0.000361615	0.000234922		0.956754	0.621554	0.46752	0.48412	0.595738		Dihydroorotase OS=Escherichia coli (strain B / BL21-DE3) OX=469008 GN=pyrC PE=3 SV=1
340	A0A140NHM2	rffA	8	5	26	24	26	8.74534e-05	8.36714e-05	9.26743e-05		0.956754	1.0597	0.586393	0.779818	0.595738		dTDP-4-amino-4,6-dideoxygalactose transaminase OS=Escherichia coli (strain B / BL21-DE3) OX=469008 GN=wecE PE=3 SV=1
879	A0A140NDX7	nadR	5	5	13	12	8	4.01006e-05	3.83664e-05	2.61505e-05		0.956754	0.652122	0.586393	0.510947	0.595738		Transcriptional regulator, XRE family OS=Escherichia coli (strain B / BL21-DE3) OX=469008 GN=ECBD_3630 PE=4 SV=1
551	A0A140NHS9	cpxA	7	5	13	12	11	3.59765e-05	3.44206e-05	3.22589e-05		0.956754	0.896668	0.691138	0.692014	0.595738		Histidine kinase OS=Escherichia coli (strain B / BL21-DE3) OX=469008 GN=ECBD_4112 PE=4 SV=1
285	A0A140NAW2	cspC	6	6	754	695	810	0.0138202	0.0132035	0.0157329		0.955379	1.1384	0.670517	0.813886	0.594661		Cold-shock DNA-binding domain protein OS=Escherichia coli (strain B / BL21-DE3) OX=469008 GN=ECBD_1818 PE=4 SV=1
691	A0A140NBT9	ftsA	8	5	38	35	28	0.000114426	0.000109238	8.93475e-05		0.954656	0.78083	0.581782	0.613868	0.594094		Cell division protein FtsA OS=Escherichia coli (strain B / BL21-DE3) OX=469008 GN=ftsA PE=3 SV=1
247	A0A140NA70	cydB	3	4	25	23	28	8.34242e-05	7.95504e-05	9.9013e-05		0.953565	1.18686	0.331765	0.832473	0.593237		Cytochrome d ubiquinol oxidase, subunit II OS=Escherichia coli (strain B / BL21-DE3) OX=469008 GN=ECBD_2927 PE=4 SV=1
572	A0A140N2P2	yibN	8	6	112	103	93	0.000990543	0.000944181	0.000871607		0.953195	0.879928	0.748995	0.681563	0.592947		Rhodanese domain protein OS=Escherichia coli (strain B / BL21-DE3) OX=469008 GN=ECBD_0114 PE=4 SV=1
1553	A0A140N7T1	dapE	9	6	37	34	8	0.000124785	0.000118851	2.85912e-05		0.952444	0.229124	0.364147	0.107963	0.592357		Succinyl-diaminopimelate desuccinylase OS=Escherichia coli (strain B / BL21-DE3) OX=469008 GN=dapE PE=3 SV=1
677	A0A140NAC4	ybeZ	16	13	96	88	72	0.000338196	0.000321323	0.000268789		0.95011	0.794774	0.660891	0.624003	0.590518		PhoH family protein OS=Escherichia coli (strain B / BL21-DE3) OX=469008 GN=ECBD_2991 PE=4 SV=1
645	A0A140N8W6	aas	8	2	12	11	2	2.11078e-05	2.00548e-05	3.72799e-06		0.95011	0.176616	0.503795	0.0669504	0.590518		Bifunctional protein Aas OS=Escherichia coli (strain B / BL21-DE3) OX=469008 GN=aas PE=3 SV=1
643	A0A140NDH1	hemL	11	12	155	142	120	0.000460165	0.000436951	0.000377525		0.949553	0.820411	0.658252	0.642114	0.590078		Glutamate-1-semialdehyde 2,1-aminomutase OS=Escherichia coli (strain B / BL21-DE3) OX=469008 GN=hemL PE=3 SV=1
681	A0A140NE23	asnB	21	19	94	86	70	0.00021459	0.00020349	0.000169341		0.948272	0.789137	0.607654	0.61993	0.589067		Asparagine synthase (Glutamine-hydrolyzing) OS=Escherichia coli (strain B / BL21-DE3) OX=469008 GN=ECBD_2988 PE=4 SV=1
553	A0A140ND98	ileS	43	38	492	450	414	0.000663367	0.000628874	0.000591522		0.948003	0.891697	0.694628	0.68894	0.588854		Isoleucine--tRNA ligase OS=Escherichia coli (strain B / BL21-DE3) OX=469008 GN=ileS PE=3 SV=1
1119	A0A140NCG0	tpx	5	4	152	139	71	0.00114426	0.00108457	0.000566399		0.947837	0.494991	0.395118	0.364979	0.588723		Thiol peroxidase OS=Escherichia coli (strain B / BL21-DE3) OX=469008 GN=tpx PE=3 SV=1
1304	A0A140N784	aroB	8	6	35	32	13	0.000122279	0.000115876	4.81292e-05		0.947642	0.393602	0.198617	0.263792	0.588569		3-dehydroquinate synthase OS=Escherichia coli (strain B / BL21-DE3) OX=469008 GN=aroB PE=3 SV=1
403	A0A140N919	yfgM	12	11	93	85	86	0.000570962	0.000540886	0.000559506		0.947324	0.979936	0.539637	0.739935	0.588317		TPR_21 domain-containing protein OS=Escherichia coli (strain B / BL21-DE3) OX=469008 GN=ECBD_1173 PE=4 SV=1
341	A0A140NCV3	ppiD	37	39	312	285	312	0.000633371	0.000599668	0.000671182		0.946788	1.0597	0.704496	0.779818	0.587893		Peptidylprolyl isomerase OS=Escherichia coli (strain B / BL21-DE3) OX=469008 GN=ECBD_3214 PE=4 SV=1
815	A0A140NI52	rffM	8	5	23	21	15	0.000118245	0.000111902	8.17203e-05		0.946355	0.691107	0.596424	0.543875	0.587549		UDP-N-acetyl-D-mannosaminuronic acid transferase OS=Escherichia coli (strain B / BL21-DE3) OX=469008 GN=wecG PE=3 SV=1
1039	A0A140NEJ9	allR	6	4	23	21	12	0.000107337	0.000101579	5.93452e-05		0.946355	0.552886	0.528135	0.420912	0.587549		Transcriptional regulator, IclR family OS=Escherichia coli (strain B / BL21-DE3) OX=469008 GN=ECBD_3151 PE=4 SV=1
86	A0A140N5M6	rpmJ	1	2	34	31	57	0.00113158	0.00106938	0.00201032		0.945029	1.77655	0.98543	0.957006	0.586499		50S ribosomal protein L36 OS=Escherichia coli (strain B / BL21-DE3) OX=469008 GN=rpmJ PE=3 SV=1
367	A0A140N2N4	yheS	19	17	79	72	76	0.000156848	0.000148165	0.0001599		0.944643	1.01946	0.607359	0.760403	0.586192		ABC transporter related OS=Escherichia coli (strain B / BL21-DE3) OX=469008 GN=ECBD_0396 PE=4 SV=1
567	A0A140NBM7	leuS	57	57	561	511	467	0.000825004	0.00077889	0.000727766		0.944105	0.882137	0.719368	0.682959	0.585765		Leucine--tRNA ligase OS=Escherichia coli (strain B / BL21-DE3) OX=469008 GN=leuS PE=3 SV=1
194	A0A140NCS6	cyoA	14	10	190	173	230	0.000762842	0.000719929	0.000978568		0.943746	1.28279	0.764474	0.86445	0.58548		Ubiquinol oxidase subunit 2 OS=Escherichia coli (strain B / BL21-DE3) OX=469008 GN=ECBD_3226 PE=3 SV=1
1317	A0A140ND77	kdsB	11	5	44	40	16	0.000224384	0.000211428	8.64653e-05		0.942258	0.385345	0.0969759	0.255518	0.584296		3-deoxy-manno-octulosonate cytidylyltransferase OS=Escherichia coli (strain B / BL21-DE3) OX=469008 GN=kdsB PE=3 SV=1
662	A0A140NBR8	ybl67	4	4	11	10	6	0.000147998	0.000139452	8.55455e-05		0.942258	0.578017	0.218434	0.444487	0.584296		Transcriptional regulator, XRE family OS=Escherichia coli (strain B / BL21-DE3) OX=469008 GN=ECBD_2112 PE=4 SV=1
649	A0A140NB62	rrmA	7	7	22	20	17	0.000103434	9.74612e-05	8.46974e-05		0.942258	0.818858	0.477558	0.641036	0.584296		rRNA (Guanine-N(1)-)-methyltransferase OS=Escherichia coli (strain B / BL21-DE3) OX=469008 GN=ECBD_1819 PE=4 SV=1
590	A0A140NAP1	yehS	3	2	11	10	9	8.91784e-05	8.4029e-05	7.73199e-05		0.942258	0.867026	0.850576	0.673317	0.584296		Uncharacterized protein OS=Escherichia coli (strain B / BL21-DE3) OX=469008 GN=ECBD_1535 PE=4 SV=1
661	A0A140N826	sixA	3	3	11	10	7	8.64088e-05	8.14194e-05	5.82701e-05		0.942258	0.674353	0.134666	0.529906	0.584296		Phosphohistidine phosphatase, SixA OS=Escherichia coli (strain B / BL21-DE3) OX=469008 GN=ECBD_1320 PE=4 SV=1
500	A0A140N7W3	yeeX	8	7	54	49	47	0.000626554	0.000589282	0.00057789		0.940513	0.92233	0.669858	0.707497	0.582906		UPF0265 protein YeeX OS=Escherichia coli (strain B / BL21-DE3) OX=469008 GN=yeeX PE=3 SV=1
191	A0A140NFT6	atpH	8	8	183	166	223	0.00130758	0.00122939	0.00168852		0.940198	1.29133	0.72909	0.867008	0.582655		ATP synthase subunit delta OS=Escherichia coli (strain B / BL21-DE3) OX=469008 GN=atpH PE=3 SV=1
424	A0A140NAR5	ychF	19	17	224	203	204	0.000780428	0.000733066	0.000753177		0.939313	0.965082	0.717834	0.731872	0.581949		Ribosome-binding ATPase YchF OS=Escherichia coli (strain B / BL21-DE3) OX=469008 GN=ychF PE=3 SV=1
701	A0A140N763	yhgF	36	30	211	191	154	0.000345219	0.000323898	0.000267002		0.938239	0.773429	0.609889	0.608407	0.58109		RNA binding S1 domain protein OS=Escherichia coli (strain B / BL21-DE3) OX=469008 GN=ECBD_0338 PE=4 SV=1
844	A0A140SS30	efp	7	6	116	105	74	0.000780354	0.000732125	0.00052753		0.938196	0.676014	0.43249	0.531303	0.581056		Elongation factor P OS=Escherichia coli (strain B / BL21-DE3) OX=469008 GN=efp PE=3 SV=1
1018	A0A140N2D9	dnaA	18	14	84	76	45	0.000227486	0.000213329	0.000129143		0.937771	0.567695	0.493582	0.434862	0.580716		Chromosomal replication initiator protein DnaA OS=Escherichia coli (strain B / BL21-DE3) OX=469008 GN=dnaA PE=3 SV=1
1101	A0A140N8K8	yciO	6	3	21	19	10	0.000128927	0.000120904	6.50588e-05		0.937771	0.504618	0.649085	0.374416	0.580716		Sua5/YciO/YrdC/YwlC family protein OS=Escherichia coli (strain B / BL21-DE3) OX=469008 GN=ECBD_2356 PE=3 SV=1
659	A0A140N749	rpoE	7	6	21	19	16	0.000139052	0.000130399	0.000112269		0.937771	0.807389	0.46222	0.633	0.580716		RNA polymerase sigma factor OS=Escherichia coli (strain B / BL21-DE3) OX=469008 GN=ECBD_1108 PE=3 SV=1
626	A0A140SSA5	rhlB	17	17	135	122	106	0.000405549	0.000379867	0.000337441		0.936674	0.832059	0.688365	0.650119	0.579838		ATP-dependent RNA helicase RhlB OS=Escherichia coli (strain B / BL21-DE3) OX=469008 GN=rhlB PE=3 SV=1
1001	A0A140NI62	wzzE	10	9	31	28	17	0.000112661	0.000105471	6.54701e-05		0.936179	0.581125	0.717266	0.447368	0.579441		ECA polysaccharide chain length modulation protein OS=Escherichia coli (strain B / BL21-DE3) OX=469008 GN=wzzE PE=3 SV=1
1265	A0A140N3R5	yrbA	3	3	41	37	16	0.00058262	0.000544961	0.000240937		0.935363	0.413541	0.244145	0.283804	0.578787		BolA family protein OS=Escherichia coli (strain B / BL21-DE3) OX=469008 GN=ECBD_0552 PE=3 SV=1
1385	A0A140N644	gshA	17	9	82	74	26	0.000200205	0.000187265	6.72693e-05		0.935363	0.336002	0.256016	0.206549	0.578787		Glutamate--cysteine ligase OS=Escherichia coli (strain B / BL21-DE3) OX=469008 GN=gshA PE=3 SV=1
970	A0A140N2H0	ilvB	12	7	41	37	23	9.22654e-05	8.63017e-05	5.48485e-05		0.935363	0.594465	0.496833	0.459648	0.578787		Acetolactate synthase OS=Escherichia coli (strain B / BL21-DE3) OX=469008 GN=ECBD_0032 PE=3 SV=1
243	A0A140NFD7	tsf	26	27	1682	1515	1887	0.00751676	0.00701746	0.00893633		0.933575	1.18885	0.760595	0.8332	0.577351		Elongation factor Ts OS=Escherichia coli (strain B / BL21-DE3) OX=469008 GN=tsf PE=3 SV=1
501	A0A140N4P3	ispG	25	20	161	145	140	0.000547362	0.000510951	0.000504381		0.933479	0.921477	0.70001	0.706992	0.577274		4-hydroxy-3-methylbut-2-en-1-yl diphosphate synthase (flavodoxin) OS=Escherichia coli (strain B / BL21-DE3) OX=469008 GN=ispG PE=3 SV=1
695	A0A140NEN1	ybcJ	4	4	30	27	22	0.000542019	0.000505615	0.00042121		0.932835	0.777112	0.503795	0.611131	0.576757		S4 RNA-binding domain-containing protein OS=Escherichia coli (strain B / BL21-DE3) OX=469008 GN=ECBD_3130 PE=4 SV=1
842	A0A140NAQ9	cmoA	9	11	50	45	32	0.000256014	0.000238819	0.000173631		0.932835	0.678207	0.594482	0.533143	0.576757		Carboxy-S-adenosyl-L-methionine synthase OS=Escherichia coli (strain B / BL21-DE3) OX=469008 GN=cmoA PE=3 SV=1
763	A0A140N964	truD	16	15	60	54	41	0.000217429	0.000202825	0.000157446		0.932835	0.724127	0.632857	0.570588	0.576757		tRNA pseudouridine synthase D OS=Escherichia coli (strain B / BL21-DE3) OX=469008 GN=truD PE=3 SV=1
820	A0A140N4V4	ftsE	8	5	20	18	13	0.000113938	0.000106285	7.84809e-05		0.932835	0.688804	0.609201	0.541971	0.576757		Cell division ATP-binding protein FtsE OS=Escherichia coli (strain B / BL21-DE3) OX=469008 GN=ftsE PE=3 SV=1
262	A0A140NG87	mraZ	3	2	10	9	11	8.32047e-05	7.76163e-05	9.6989e-05		0.932835	1.16567	0.609201	0.824557	0.576757		Transcriptional regulator MraZ OS=Escherichia coli (strain B / BL21-DE3) OX=469008 GN=mraZ PE=3 SV=1
1067	A0A140N6K1	argA	5	3	10	9	5	2.85488e-05	2.66313e-05	1.51265e-05		0.932835	0.529849	0.351139	0.398904	0.576757		Amino-acid acetyltransferase OS=Escherichia coli (strain B / BL21-DE3) OX=469008 GN=argA PE=3 SV=1
350	A0A140N2U8	glyS	49	45	488	439	480	0.000895761	0.000835217	0.000933675		0.93241	1.04233	0.755139	0.771609	0.576415		Glycine--tRNA ligase beta subunit OS=Escherichia coli (strain B / BL21-DE3) OX=469008 GN=glyS PE=3 SV=1
766	A0A140SSB3	glmU	16	13	149	134	101	0.00041325	0.000385207	0.000296845		0.93214	0.718319	0.360837	0.565969	0.576197		Bifunctional protein GlmU OS=Escherichia coli (strain B / BL21-DE3) OX=469008 GN=glmU PE=3 SV=1
352	A0A140N6J6	hisS	25	24	267	240	262	0.00079641	0.000741992	0.00082815		0.931671	1.03985	0.703505	0.770419	0.575819		Histidine--tRNA ligase OS=Escherichia coli (strain B / BL21-DE3) OX=469008 GN=hisS PE=3 SV=1
978	A0A140NDR7	mpl	12	10	79	71	44	0.000218626	0.000203655	0.000129036		0.931523	0.590212	0.52859	0.455748	0.575701		UDP-N-acetylmuramate--L-alanyl-gamma-D-glutamyl-meso-2,6-diaminoheptandioate ligase OS=Escherichia coli (strain B / BL21-DE3) OX=469008 GN=mpl PE=3 SV=1
282	A0A140N4L0	rplR	11	11	721	647	779	0.00779365	0.0072489	0.00892329		0.930104	1.14494	0.659191	0.816497	0.574556		50S ribosomal protein L18 OS=Escherichia coli (strain B / BL21-DE3) OX=469008 GN=rplR PE=3 SV=1
742	A0A140NCZ5	yajC	5	6	116	104	81	0.0013337	0.00123935	0.000986884		0.929261	0.739962	0.68547	0.583007	0.573876		Sec translocon accessory complex subunit YajC OS=Escherichia coli (strain B / BL21-DE3) OX=469008 GN=yajC PE=3 SV=1
397	A0A140NB54	proQ	15	13	173	155	161	0.000943082	0.000875785	0.000930061		0.928641	0.986193	0.750074	0.743271	0.573375		RNA chaperone ProQ OS=Escherichia coli (strain B / BL21-DE3) OX=469008 GN=proQ PE=3 SV=1
1230	A0A140N7I7	yhaM	13	5	48	43	20	0.000139234	0.000129281	6.14776e-05		0.928517	0.441541	0.249581	0.311891	0.573274		UPF0597 protein YhaM OS=Escherichia coli (strain B / BL21-DE3) OX=469008 GN=yhaM PE=3 SV=1
926	A0A140NGG2	fklB	11	10	143	128	85	0.000877931	0.00081451	0.000553		0.927762	0.629891	0.313782	0.491522	0.572664		Peptidyl-prolyl cis-trans isomerase OS=Escherichia coli (strain B / BL21-DE3) OX=469008 GN=ECBD_3822 PE=3 SV=1
221	A0A140NFD2	metQ	14	14	181	162	211	0.000844696	0.000783609	0.00104349		0.927681	1.23534	0.74373	0.849393	0.572599		Lipoprotein OS=Escherichia coli (strain B / BL21-DE3) OX=469008 GN=ECBD_3421 PE=3 SV=1
203	A0A140NCS9	prs	16	17	457	409	549	0.00171505	0.00159092	0.00218331		0.927619	1.27303	0.785401	0.861468	0.572548		Ribose-phosphate pyrophosphokinase OS=Escherichia coli (strain B / BL21-DE3) OX=469008 GN=prs PE=3 SV=1
1109	A0A140NFJ8	yadG	12	7	38	34	18	0.000156036	0.000144705	7.83241e-05		0.92738	0.501962	0.376396	0.371817	0.572355		ABC transporter related OS=Escherichia coli (strain B / BL21-DE3) OX=469008 GN=ECBD_3492 PE=4 SV=1
1030	A0A140NBM8	ydhF	6	4	19	17	10	8.0636e-05	7.47802e-05	4.49736e-05		0.92738	0.557736	0.561387	0.425499	0.572355		Aldo/keto reductase OS=Escherichia coli (strain B / BL21-DE3) OX=469008 GN=ECBD_1996 PE=4 SV=1
698	A0A140N8G7	efeB	8	1	19	17	3	5.68074e-05	5.2682e-05	9.50505e-06		0.92738	0.167321	0.274194	0.0604408	0.572355		Deferrochelatase/peroxidase OS=Escherichia coli (strain B / BL21-DE3) OX=469008 GN=ECBD_2575 PE=3 SV=1
531	A0A140N7C1	trpS	19	17	198	177	170	0.000749739	0.000694673	0.000682144		0.926554	0.909842	0.706818	0.700043	0.571686		Tryptophan--tRNA ligase OS=Escherichia coli (strain B / BL21-DE3) OX=469008 GN=trpS PE=3 SV=1
1114	A0A140NAW6	rmlA	16	11	113	101	53	0.000489426	0.000453411	0.000243258		0.926415	0.497027	0.321085	0.366978	0.571574		Glucose-1-phosphate thymidylyltransferase OS=Escherichia coli (strain B / BL21-DE3) OX=469008 GN=ECBD_1616 PE=3 SV=1
1555	A0A140N7C4	purN	6	2	28	25	6	0.000167037	0.000154582	3.79305e-05		0.925432	0.227078	0.0869561	0.106246	0.570777		Phosphoribosylglycinamide formyltransferase OS=Escherichia coli (strain B / BL21-DE3) OX=469008 GN=purN PE=3 SV=1
1068	A0A140NCV4	queA	8	5	28	25	14	9.94717e-05	9.20543e-05	5.2705e-05		0.925432	0.529849	0.418858	0.398904	0.570777		S-adenosylmethionine:tRNA ribosyltransferase-isomerase OS=Escherichia coli (strain B / BL21-DE3) OX=469008 GN=queA PE=3 SV=1
228	A0A140NE27	aceF	55	44	1614	1441	1856	0.00324007	0.00299832	0.00394831		0.925386	1.21859	0.700467	0.843728	0.57074		Acetyltransferase component of pyruvate dehydrogenase complex OS=Escherichia coli (strain B / BL21-DE3) OX=469008 GN=ECBD_3504 PE=3 SV=1
574	A0A140NDC7	secD	29	23	210	187	174	0.000439718	0.000405843	0.000386088		0.922964	0.878036	0.523845	0.680364	0.568773		Protein translocase subunit SecD OS=Escherichia coli (strain B / BL21-DE3) OX=469008 GN=secD PE=3 SV=1
1240	A0A140N660	yejL	3	2	27	24	11	0.000455296	0.000419473	0.000196564		0.921319	0.431729	0.333204	0.302058	0.567434		UPF0352 protein YejL OS=Escherichia coli (strain B / BL21-DE3) OX=469008 GN=yejL PE=3 SV=1
1172	A0A140N2L7	rph	5	5	36	32	16	0.000191301	0.000176249	9.00983e-05		0.921319	0.470977	0.592822	0.341253	0.567434		Ribonuclease PH OS=Escherichia coli (strain B / BL21-DE3) OX=469008 GN=rph PE=3 SV=1
1510	A0A140NFE6	mtn	3	3	27	24	7	0.000147186	0.000135605	4.04374e-05		0.921319	0.274737	0.297078	0.14819	0.567434		5'-methylthioadenosine/S-adenosylhomocysteine nucleosidase OS=Escherichia coli (strain B / BL21-DE3) OX=469008 GN=mtnN PE=3 SV=1
97	A0A140NAD1	hisI	2	4	9	8	14	5.60709e-05	5.16592e-05	9.24284e-05		0.921319	1.64842	0.734989	0.941623	0.567434		Histidine biosynthesis bifunctional protein HisIE OS=Escherichia coli (strain B / BL21-DE3) OX=469008 GN=hisI PE=3 SV=1
708	A0A140NGC2	atpB	3	2	9	8	3	4.20015e-05	3.86968e-05	1.48363e-05		0.921319	0.353233	0.189637	0.223524	0.567434		ATP synthase subunit a OS=Escherichia coli (strain B / BL21-DE3) OX=469008 GN=atpB PE=3 SV=1
1484	A0A140NCP8	ybeB	5	3	44	39	12	0.000529974	0.000486888	0.000153167		0.918701	0.289009	0.535449	0.161427	0.565299		Ribosomal silencing factor RsfS OS=Escherichia coli (strain B / BL21-DE3) OX=469008 GN=rsfS PE=3 SV=1
744	A0A140N583	rfaE	24	18	167	148	116	0.000442782	0.000406722	0.000325922		0.91856	0.736078	0.62378	0.579984	0.565183		Bifunctional protein HldE OS=Escherichia coli (strain B / BL21-DE3) OX=469008 GN=hldE PE=3 SV=1
704	A0A140NAY6	ycdY	8	8	114	101	83	0.000783571	0.000719544	0.000604552		0.918288	0.771535	0.481055	0.607	0.564961		Cytoplasmic chaperone TorD family protein OS=Escherichia coli (strain B / BL21-DE3) OX=469008 GN=ECBD_2564 PE=4 SV=1
1225	A0A140NBA0	yebC	11	7	105	93	44	0.000539816	0.000495566	0.000239713		0.918028	0.444064	0.180734	0.314416	0.564749		Probable transcriptional regulatory protein YebC OS=Escherichia coli (strain B / BL21-DE3) OX=469008 GN=yebC PE=3 SV=1
585	A0A140N5P0	rsmI	16	13	96	85	79	0.000424518	0.000389589	0.000370198		0.91772	0.872043	0.723651	0.676544	0.564496		Ribosomal RNA small subunit methyltransferase I OS=Escherichia coli (strain B / BL21-DE3) OX=469008 GN=rsmI PE=3 SV=1
669	A0A140ND85	phoU	12	11	61	54	46	0.000320114	0.000293718	0.000255808		0.917543	0.799117	0.465698	0.627119	0.564352		Phosphate-specific transport system accessory protein PhoU OS=Escherichia coli (strain B / BL21-DE3) OX=469008 GN=ECBD_4308 PE=3 SV=1
426	A0A140NEF6	ppa	12	10	505	447	459	0.00362886	0.00332927	0.00349521		0.917442	0.963171	0.627567	0.73082	0.564269		Inorganic pyrophosphatase OS=Escherichia coli (strain B / BL21-DE3) OX=469008 GN=ppa PE=3 SV=1
994	A0A140NBN4	erpA	4	4	87	77	48	0.000965174	0.0008854	0.0005643		0.917348	0.584661	0.43249	0.450637	0.564192		Iron-sulfur cluster insertion protein ErpA OS=Escherichia coli (strain B / BL21-DE3) OX=469008 GN=erpA PE=3 SV=1
342	A0A140N9F2	tolR	5	4	26	23	26	0.000231567	0.000212321	0.000245391		0.916889	1.0597	0.667119	0.779818	0.563817		Tol-Pal system protein TolR OS=Escherichia coli (strain B / BL21-DE3) OX=469008 GN=tolR PE=3 SV=1
1015	A0A140NAW7	prc	24	15	104	92	56	0.000192859	0.000176831	0.000110047		0.916889	0.570607	0.47602	0.437585	0.563817		Carboxyl-terminal protease OS=Escherichia coli (strain B / BL21-DE3) OX=469008 GN=ECBD_1810 PE=3 SV=1
1016	A0A140N5V1	elbB	5	3	26	23	14	0.000151532	0.000138938	8.64653e-05		0.916889	0.570607	0.0997359	0.437585	0.563817		Glyoxalase OS=Escherichia coli (strain B / BL21-DE3) OX=469008 GN=ECBD_0533 PE=3 SV=1
361	A0A140N7U4	gnd	40	36	551	487	532	0.00148901	0.00136407	0.00152349		0.916093	1.02316	0.711874	0.762247	0.563165		6-phosphogluconate dehydrogenase, decarboxylating OS=Escherichia coli (strain B / BL21-DE3) OX=469008 GN=ECBD_1630 PE=3 SV=1
909	A0A140NBG3	frsA	15	10	43	38	26	0.000131359	0.00012032	8.41679e-05		0.915962	0.640748	0.49047	0.501066	0.563058		Esterase FrsA OS=Escherichia coli (strain B / BL21-DE3) OX=469008 GN=frsA PE=3 SV=1
769	A0A140NIC8	mnmE	20	17	102	90	69	0.000284142	0.000259861	0.000203689		0.914544	0.716855	0.575456	0.564799	0.561895		tRNA modification GTPase MnmE OS=Escherichia coli (strain B / BL21-DE3) OX=469008 GN=mnmE PE=3 SV=1
1455	A0A140N4Z4	glpR	6	3	17	15	5	8.53178e-05	7.80269e-05	2.65915e-05		0.914544	0.311676	0.791933	0.182936	0.561895		Transcriptional regulator, DeoR family OS=Escherichia coli (strain B / BL21-DE3) OX=469008 GN=ECBD_0319 PE=4 SV=1
584	A0A140N8B5	yfaY	8	5	17	15	14	5.37502e-05	4.9157e-05	4.69074e-05		0.914544	0.872693	0.153564	0.676959	0.561895		CinA-like protein OS=Escherichia coli (strain B / BL21-DE3) OX=469008 GN=ECBD_1410 PE=3 SV=1
184	A0A140N6T6	cysG	9	9	17	15	21	4.70462e-05	4.30258e-05	6.15852e-05		0.914544	1.30904	0.791933	0.872178	0.561895		Siroheme synthase OS=Escherichia coli (strain B / BL21-DE3) OX=469008 GN=cysG PE=3 SV=1
1340	A0A140N8F0	fadD	9	4	17	15	6	3.68784e-05	3.37269e-05	1.37929e-05		0.914544	0.374011	0.379347	0.244186	0.561895		Long-chain-fatty-acid--CoA ligase OS=Escherichia coli (strain B / BL21-DE3) OX=469008 GN=ECBD_1837 PE=4 SV=1
670	A0A140NE43	miaB	33	24	252	222	190	0.000672378	0.000613944	0.000537216		0.913093	0.798979	0.574736	0.62702	0.560703		tRNA-2-methylthio-N(6)-dimethylallyladenosine synthase OS=Escherichia coli (strain B / BL21-DE3) OX=469008 GN=miaB PE=3 SV=1
837	A0A140N599	parE	12	14	67	59	43	0.000134501	0.000122762	9.14748e-05		0.912724	0.680105	0.64478	0.534732	0.560401		DNA topoisomerase 4 subunit B OS=Escherichia coli (strain B / BL21-DE3) OX=469008 GN=parE PE=3 SV=1
741	A0A140NDM9	gnsA	5	6	50	44	35	0.0011094	0.00101189	0.000822937		0.912106	0.741789	0.547984	0.584423	0.559892		GnsAGnsB family protein OS=Escherichia coli (strain B / BL21-DE3) OX=469008 GN=ECBD_2603 PE=4 SV=1
843	A0A140NAY0	rnd	11	5	25	22	16	8.52231e-05	7.77325e-05	5.77989e-05		0.912106	0.678207	0.637457	0.533143	0.559892		Ribonuclease D OS=Escherichia coli (strain B / BL21-DE3) OX=469008 GN=rnd PE=3 SV=1
1259	A0A140NDD2	serB	9	6	33	29	13	0.000129613	0.000118058	5.41079e-05		0.910849	0.417457	0.394554	0.287736	0.558858		Phosphoserine phosphatase SerB OS=Escherichia coli (strain B / BL21-DE3) OX=469008 GN=ECBD_3632 PE=4 SV=1
309	A0A140N702	pntA	12	13	33	29	34	8.18343e-05	7.45387e-05	8.93475e-05		0.910849	1.09181	0.734989	0.794323	0.558858		NAD(P) transhydrogenase subunit alpha OS=Escherichia coli (strain B / BL21-DE3) OX=469008 GN=ECBD_2043 PE=3 SV=1
314	A0A140N8Q6	kdsA	19	19	214	188	218	0.000952987	0.000867747	0.00102875		0.910556	1.07951	0.631776	0.788866	0.558616		2-dehydro-3-deoxyphosphooctonate aldolase OS=Escherichia coli (strain B / BL21-DE3) OX=469008 GN=kdsA PE=3 SV=1
462	A0A140NAE3	ghrA	16	14	107	94	95	0.000433731	0.000394936	0.000408077		0.910556	0.940853	0.434853	0.718273	0.558616		Glyoxylate/hydroxypyruvate reductase A OS=Escherichia coli (strain B / BL21-DE3) OX=469008 GN=ghrA PE=3 SV=1
167	A0A140N4G2	secB	4	4	74	65	97	0.000603798	0.000549712	0.000838713		0.910425	1.38906	0.696766	0.893324	0.558508		Protein-export protein SecB OS=Escherichia coli (strain B / BL21-DE3) OX=469008 GN=secB PE=3 SV=1
948	A0A140ND59	asnA	14	10	73	64	42	0.000279769	0.000254226	0.000170572		0.908698	0.609689	0.530593	0.47348	0.557084		Aspartate--ammonia ligase OS=Escherichia coli (strain B / BL21-DE3) OX=469008 GN=asnA PE=3 SV=1
588	A0A140N6C1	gyrB	41	33	344	301	282	0.00054112	0.000490755	0.000470074		0.906923	0.868706	0.593787	0.6744	0.555617		DNA gyrase subunit B OS=Escherichia coli (strain B / BL21-DE3) OX=469008 GN=gyrB PE=3 SV=1
528	A0A140N8W1	lepB	14	15	72	63	62	0.000281047	0.000254888	0.00025646		0.906923	0.912518	0.678639	0.701653	0.555617		Signal peptidase I OS=Escherichia coli (strain B / BL21-DE3) OX=469008 GN=ECBD_1113 PE=3 SV=1
713	A0A140NAL9	uup	24	17	72	63	52	0.0001434	0.000130053	0.00010975		0.906923	0.765338	0.560811	0.602372	0.555617		ABC transporter related OS=Escherichia coli (strain B / BL21-DE3) OX=469008 GN=ECBD_2646 PE=4 SV=1
746	A0A140N4M3	nikR	4	1	8	7	4	7.60729e-05	6.89922e-05	4.03071e-05		0.906923	0.529849	0.571668	0.398904	0.555617		Nickel-responsive regulator OS=Escherichia coli (strain B / BL21-DE3) OX=469008 GN=nikR PE=3 SV=1
748	A0A140NCG9	ispE	6	2	16	14	2	7.15031e-05	6.48478e-05	9.47146e-06		0.906923	0.132462	0.571668	0.0384573	0.555617		4-diphosphocytidyl-2-C-methyl-D-erythritol kinase OS=Escherichia coli (strain B / BL21-DE3) OX=469008 GN=ispE PE=3 SV=1
867	A0A140NBP1	sfsA	3	3	8	7	5	4.3238e-05	3.92135e-05	2.8637e-05		0.906923	0.662311	0.46752	0.519695	0.555617		Sugar fermentation stimulation protein A OS=Escherichia coli (strain B / BL21-DE3) OX=469008 GN=sfsA PE=3 SV=1
556	A0A140N4N0	pyrE	13	11	88	77	74	0.00052251	0.000473876	0.000465614		0.906923	0.89111	0.682568	0.688575	0.555617		Orotate phosphoribosyltransferase OS=Escherichia coli (strain B / BL21-DE3) OX=469008 GN=pyrE PE=3 SV=1
575	A0A140N7E7	pheA	14	11	64	56	53	0.000209693	0.000190176	0.000184019		0.906923	0.877563	0.595413	0.680064	0.555617		Chorismate mutase OS=Escherichia coli (strain B / BL21-DE3) OX=469008 GN=ECBD_1087 PE=4 SV=1
792	A0A140NDW0	rseP	8	6	24	21	16	6.74513e-05	6.11731e-05	4.7652e-05		0.906923	0.706465	0.571668	0.556436	0.555617		Zinc metalloprotease OS=Escherichia coli (strain B / BL21-DE3) OX=469008 GN=ECBD_3443 PE=3 SV=1
747	A0A140NEA3	ubiA	2	1	8	7	2	3.48886e-05	3.16413e-05	9.24284e-06		0.906923	0.264925	0.115353	0.139251	0.555617		4-hydroxybenzoate octaprenyltransferase OS=Escherichia coli (strain B / BL21-DE3) OX=469008 GN=ubiA PE=3 SV=1
868	A0A140NEB0	ubiF	3	3	8	7	5	2.58764e-05	2.34679e-05	1.71383e-05		0.906923	0.662311	0.571668	0.519695	0.555617		Ubiquinone biosynthesis hydroxylase, UbiH/UbiF/VisC/COQ6 family OS=Escherichia coli (strain B / BL21-DE3) OX=469008 GN=ECBD_2989 PE=4 SV=1
210	A0A140N6Z2	rplP	8	9	317	277	375	0.00294789	0.0026699	0.00369544		0.905697	1.25359	0.790149	0.855353	0.554602		50S ribosomal protein L16 OS=Escherichia coli (strain B / BL21-DE3) OX=469008 GN=rplP PE=3 SV=1
368	A0A140N8N4	pheT	35	28	340	297	327	0.000540883	0.000489715	0.000551257		0.905399	1.01918	0.734989	0.760265	0.554355		Phenylalanine--tRNA ligase beta subunit OS=Escherichia coli (strain B / BL21-DE3) OX=469008 GN=pheT PE=3 SV=1
785	A0A140NBE4	tolQ	9	6	55	48	37	0.000302431	0.000273569	0.000215599		0.904568	0.712888	0.524205	0.561619	0.553666		Tol-Pal system protein TolQ OS=Escherichia coli (strain B / BL21-DE3) OX=469008 GN=tolQ PE=3 SV=1
289	A0A140NDJ4	rimO	15	13	86	75	92	0.000246633	0.000222934	0.000279591		0.90391	1.13363	0.651305	0.81196	0.553121		Ribosomal protein S12 methylthiotransferase RimO OS=Escherichia coli (strain B / BL21-DE3) OX=469008 GN=rimO PE=3 SV=1
716	A0A140NFZ9	dnaJ	16	13	161	140	116	0.000541539	0.000488083	0.00041347		0.90129	0.763509	0.636433	0.600998	0.550945		Chaperone protein DnaJ OS=Escherichia coli (strain B / BL21-DE3) OX=469008 GN=dnaJ PE=3 SV=1
1069	A0A140N5U1	sdaC	4	4	46	40	23	0.00013561	0.000122224	7.18529e-05		0.90129	0.529849	0.563187	0.398904	0.550945		Serine transporter OS=Escherichia coli (strain B / BL21-DE3) OX=469008 GN=ECBD_0932 PE=4 SV=1
449	A0A140NBS3	lpd	41	40	1696	1471	1524	0.00452521	0.00406807	0.00430904		0.898978	0.952229	0.667002	0.724727	0.54902		Dihydrolipoyl dehydrogenase OS=Escherichia coli (strain B / BL21-DE3) OX=469008 GN=ECBD_3503 PE=3 SV=1
757	A0A140N5K1	amiA	9	1	15	13	1	6.56425e-05	5.89657e-05	4.63741e-06		0.898286	0.0706465	0.318784	0.0107047	0.548442		N-acetylmuramoyl-L-alanine amidase OS=Escherichia coli (strain B / BL21-DE3) OX=469008 GN=ECBD_1247 PE=4 SV=1
1546	A0A140N5S4	csdE	9	5	30	26	7	0.000258104	0.000231851	6.38196e-05		0.898286	0.247263	0.0537784	0.123535	0.548442		Cysteine desulfurase, sulfur acceptor subunit CsdE OS=Escherichia coli (strain B / BL21-DE3) OX=469008 GN=ECBD_0911 PE=4 SV=1
852	A0A140N934	sseA	7	5	30	26	19	0.000135023	0.000121289	9.06193e-05		0.898286	0.671142	0.784126	0.527197	0.548442		Sulfurtransferase OS=Escherichia coli (strain B / BL21-DE3) OX=469008 GN=ECBD_1165 PE=4 SV=1
508	A0A140N6W7	rseB	10	8	30	26	26	0.000119312	0.000107177	0.000109577		0.898286	0.918405	0.65542	0.705171	0.548442		Sigma E regulatory protein, MucB/RseB OS=Escherichia coli (strain B / BL21-DE3) OX=469008 GN=ECBD_1110 PE=4 SV=1
1217	A0A140NCR5	acpP	4	4	126	109	53	0.002043	0.00183183	0.000910657		0.896641	0.445746	0.320332	0.316099	0.547068		Acyl carrier protein OS=Escherichia coli (strain B / BL21-DE3) OX=469008 GN=acpP PE=3 SV=1
375	A0A140N536	ffh	26	19	154	133	147	0.000429946	0.000384864	0.000434903		0.895145	1.01153	0.558959	0.756411	0.545817		Signal recognition particle protein OS=Escherichia coli (strain B / BL21-DE3) OX=469008 GN=ffh PE=3 SV=1
762	A0A140NFJ7	yigL	11	2	44	38	2	0.0002092	0.000187265	1.00768e-05		0.895145	0.0481681	0.015655	0.00476523	0.545817		Cof-like hydrolase OS=Escherichia coli (strain B / BL21-DE3) OX=469008 GN=ECBD_4212 PE=4 SV=1
1052	A0A140N666	avtA	11	7	73	63	37	0.0002214	0.000198042	0.000118916		0.8945	0.537107	0.50768	0.405877	0.545277		Aminotransferase class I and II OS=Escherichia coli (strain B / BL21-DE3) OX=469008 GN=ECBD_0162 PE=4 SV=1
577	A0A140SS21	rlmB	6	5	29	25	24	0.000150933	0.000134861	0.000132367		0.89352	0.876992	0.578314	0.679701	0.544456		23S rRNA (guanosine-2'-O-)-methyltransferase RlmB OS=Escherichia coli (strain B / BL21-DE3) OX=469008 GN=rlmB PE=3 SV=1
711	A0A140N7Y8	ispB	8	6	29	25	21	0.00011355	0.000101459	8.71345e-05		0.89352	0.767368	0.628857	0.603892	0.544456		Trans-hexaprenyltranstransferase OS=Escherichia coli (strain B / BL21-DE3) OX=469008 GN=ECBD_0555 PE=3 SV=1
1043	A0A140N8V0	rfbB	19	16	123	106	64	0.000430913	0.000384904	0.0002376		0.89323	0.551388	0.503795	0.419492	0.544213		dTDP-glucose 4,6-dehydratase OS=Escherichia coli (strain B / BL21-DE3) OX=469008 GN=ECBD_1614 PE=3 SV=1
600	A0A140ND61	htpG	55	48	807	695	652	0.00163561	0.00146	0.00140035		0.892635	0.856163	0.64766	0.666243	0.543714		Chaperone protein HtpG OS=Escherichia coli (strain B / BL21-DE3) OX=469008 GN=htpG PE=3 SV=1
1367	A0A140NCM4	fadR	10	6	36	31	12	0.0001905	0.000170027	6.7291e-05		0.892528	0.353233	0.479774	0.223524	0.543624		Fatty acid metabolism regulator protein OS=Escherichia coli (strain B / BL21-DE3) OX=469008 GN=fadR PE=3 SV=1
1232	A0A140NC86	ybeX	13	7	36	31	15	0.000155923	0.000139166	6.88465e-05		0.892528	0.441541	0.503795	0.311891	0.543624		Transporter-associated region OS=Escherichia coli (strain B / BL21-DE3) OX=469008 GN=ECBD_2993 PE=4 SV=1
1326	A0A140NF13	frmA	9	6	36	31	13	0.000123386	0.000110126	4.72161e-05		0.892528	0.382669	0.216011	0.25284	0.543624		S-(hydroxymethyl)glutathione dehydrogenase OS=Escherichia coli (strain B / BL21-DE3) OX=469008 GN=ECBD_3301 PE=3 SV=1
1221	A0A140N8V5	pssA	15	9	50	43	21	0.000140212	0.000124982	6.24046e-05		0.891376	0.445073	0.745506	0.315426	0.542657		Phospholipase D/Transphosphatidylase OS=Escherichia coli (strain B / BL21-DE3) OX=469008 GN=ECBD_1095 PE=4 SV=1
639	A0A140NB69	ihfA	9	9	98	84	76	0.00125194	0.00111224	0.00102885		0.888415	0.821807	0.543376	0.643081	0.540166		Integration host factor subunit alpha OS=Escherichia coli (strain B / BL21-DE3) OX=469008 GN=ihfA PE=3 SV=1
400	A0A140N1Q5	ibpA	4	3	28	24	26	0.000258481	0.000229638	0.000254347		0.888415	0.984005	0.734989	0.742109	0.540166		Small heat shock protein IbpA OS=Escherichia coli (strain B / BL21-DE3) OX=469008 GN=ibpA PE=3 SV=1
344	A0A140N6B0	dppD	4	5	7	6	7	2.70733e-05	2.40523e-05	2.86896e-05		0.888415	1.0597	0.923438	0.779818	0.540166		Oligopeptide/dipeptide ABC transporter, ATPase subunit OS=Escherichia coli (strain B / BL21-DE3) OX=469008 GN=ECBD_0195 PE=3 SV=1
775	A0A140N4A7	feoB	4	3	7	6	3	1.14528e-05	1.01748e-05	5.20134e-06		0.888415	0.454156	0.734989	0.324504	0.540166		Ferrous iron transport protein B OS=Escherichia coli (strain B / BL21-DE3) OX=469008 GN=ECBD_0336 PE=3 SV=1
783	A0A140N714	yebG	4	2	14	12	3	0.000184437	0.000163857	4.18816e-05		0.888415	0.227078	0.281548	0.106246	0.540166		YebG family protein OS=Escherichia coli (strain B / BL21-DE3) OX=469008 GN=ECBD_1791 PE=4 SV=1
779	A0A140NFG4	yjbJ	3	2	7	6	6	0.000128304	0.000113987	0.00011654		0.888415	0.908313	0.146064	0.69912	0.540166		CsbD family protein OS=Escherichia coli (strain B / BL21-DE3) OX=469008 GN=ECBD_3988 PE=3 SV=1
784	A0A140NFI2	rof	2	1	7	6	1	0.000102942	9.14548e-05	1.55839e-05		0.888415	0.151385	0.281548	0.0498937	0.540166		Transcriptional antiterminator, Rof OS=Escherichia coli (strain B / BL21-DE3) OX=469008 GN=ECBD_3430 PE=4 SV=1
720	A0A140NFJ6	nadC	6	5	21	18	15	8.9424e-05	7.94456e-05	6.76875e-05		0.888415	0.756927	0.32806	0.596027	0.540166		Nicotinate-nucleotide pyrophosphorylase OS=Escherichia coli (strain B / BL21-DE3) OX=469008 GN=ECBD_3510 PE=3 SV=1
535	C5W716	nuoK	2	2	7	6	6	8.85298e-05	7.86512e-05	8.04127e-05		0.888415	0.908313	0.543376	0.69912	0.540166		NADH-quinone oxidoreductase subunit K OS=Escherichia coli (strain B / BL21-DE3) OX=469008 GN=nuoK PE=1 SV=1
776	A0A140N3H1	mqsA	3	3	7	6	7	6.758e-05	6.0039e-05	7.16144e-05		0.888415	1.0597	0.281548	0.779818	0.540166		Transcriptional regulator, XRE family OS=Escherichia coli (strain B / BL21-DE3) OX=469008 GN=ECBD_0718 PE=4 SV=1
345	A0A140NBB9	flgH	5	4	7	6	7	3.76723e-05	3.34686e-05	3.99212e-05		0.888415	1.0597	0.894109	0.779818	0.540166		Flagellar L-ring protein OS=Escherichia coli (strain B / BL21-DE3) OX=469008 GN=flgH PE=3 SV=1
782	A0A140N6Z3	gabD	4	3	7	6	3	1.83672e-05	1.63177e-05	8.34157e-06		0.888415	0.454156	0.0396405	0.324504	0.540166		Succinic semialdehyde dehydrogenase OS=Escherichia coli (strain B / BL21-DE3) OX=469008 GN=ECBD_1058 PE=3 SV=1
721	A0A140N773	yrfF	5	4	7	6	5	1.25219e-05	1.11246e-05	9.47816e-06		0.888415	0.756927	0.894109	0.596027	0.540166		Intracellular growth attenuator IgaA OS=Escherichia coli (strain B / BL21-DE3) OX=469008 GN=ECBD_0348 PE=4 SV=1
539	A0A140NF86	hslU	41	35	671	575	575	0.00191562	0.00170145	0.00173955		0.888194	0.908087	0.712735	0.698984	0.53998		ATP-dependent protease ATPase subunit HslU OS=Escherichia coli (strain B / BL21-DE3) OX=469008 GN=hslU PE=2 SV=1
1138	A0A140N564	ftsY	21	14	132	113	60	0.000335899	0.000298041	0.000161796		0.887293	0.481681	0.516613	0.351859	0.53922		Signal recognition particle receptor FtsY OS=Escherichia coli (strain B / BL21-DE3) OX=469008 GN=ftsY PE=3 SV=1
604	A0A140NBF1	mdoG	26	22	159	136	128	0.000393521	0.000348877	0.000335709		0.886552	0.85309	0.540461	0.664221	0.538595		Glucans biosynthesis protein G OS=Escherichia coli (strain B / BL21-DE3) OX=469008 GN=mdoG PE=3 SV=1
1257	A0A140N9T5	maeA	19	15	76	65	30	0.00017012	0.000150806	7.11617e-05		0.886466	0.418302	0.550939	0.288584	0.538523		NAD-dependent malic enzyme OS=Escherichia coli (strain B / BL21-DE3) OX=469008 GN=maeA PE=3 SV=1
823	A0A140N9W7	purF	16	14	62	53	40	0.000155271	0.000137575	0.000106155		0.886026	0.683676	0.613865	0.537713	0.538151		Amidophosphoribosyltransferase OS=Escherichia coli (strain B / BL21-DE3) OX=469008 GN=purF PE=3 SV=1
767	A0A140N7X9	speC	15	12	62	53	42	0.000110284	9.77147e-05	7.91687e-05		0.886026	0.71786	0.647539	0.565603	0.538151		Ornithine decarboxylase OS=Escherichia coli (strain B / BL21-DE3) OX=469008 GN=ECBD_0772 PE=4 SV=1
315	A0A140N8Z3	iscR	5	6	54	46	55	0.00042157	0.000372217	0.00045501		0.88293	1.07932	0.797093	0.788784	0.535533		HTH-type transcriptional regulator IscR OS=Escherichia coli (strain B / BL21-DE3) OX=469008 GN=iscR PE=3 SV=1
1400	A0A140NBF0	sodB	8	8	235	200	72	0.00153993	0.0013584	0.000499976		0.882114	0.324673	0.164669	0.195494	0.534841		Superoxide dismutase OS=Escherichia coli (strain B / BL21-DE3) OX=469008 GN=ECBD_1987 PE=3 SV=1
385	A0A140N8S8	lysS	37	33	463	394	436	0.00115953	0.00102272	0.00115709		0.882018	0.997901	0.736142	0.749415	0.53476		Lysine--tRNA ligase OS=Escherichia coli (strain B / BL21-DE3) OX=469008 GN=lysS PE=3 SV=1
605	A0A140N9Q4	nrdA	43	40	481	409	387	0.000799377	0.000704519	0.000681553		0.881334	0.852605	0.61996	0.663901	0.53418		Ribonucleoside-diphosphate reductase OS=Escherichia coli (strain B / BL21-DE3) OX=469008 GN=ECBD_1426 PE=3 SV=1
821	A0A140NF68	ybaK	10	7	40	34	26	0.000318166	0.000280308	0.000219154		0.881011	0.688804	0.46752	0.541971	0.533906		Cys-tRNA(Pro)/Cys-tRNA(Cys) deacylase OS=Escherichia coli (strain B / BL21-DE3) OX=469008 GN=ECBD_3175 PE=3 SV=1
665	A0A140NA88	cyoB	8	6	120	102	91	0.000228907	0.00020167	0.000183951		0.881011	0.803604	0.632857	0.630318	0.533906		Cytochrome o ubiquinol oxidase, subunit I OS=Escherichia coli (strain B / BL21-DE3) OX=469008 GN=ECBD_3227 PE=3 SV=1
355	A0A140N849	usg	15	13	132	112	129	0.000495377	0.000435654	0.000513019		0.879441	1.03561	0.658413	0.768368	0.532573		Aspartate-semialdehyde dehydrogenase OS=Escherichia coli (strain B / BL21-DE3) OX=469008 GN=ECBD_1340 PE=3 SV=1
1004	A0A140NDN8	fruR	12	8	33	28	18	0.000124957	0.000109892	7.2227e-05		0.879441	0.578017	0.365719	0.444487	0.532573		Transcriptional regulator, LacI family OS=Escherichia coli (strain B / BL21-DE3) OX=469008 GN=ECBD_3537 PE=4 SV=1
799	A0A140NAN5	ompF	19	18	388	329	258	0.00135555	0.00119135	0.000955179		0.878874	0.704645	0.61774	0.55496	0.532091		Porin Gram-negative type OS=Escherichia coli (strain B / BL21-DE3) OX=469008 GN=ECBD_2666 PE=3 SV=1
1246	A0A140N8V2	minD	17	12	157	133	63	0.000735406	0.000645716	0.000312716		0.87804	0.425229	0.466812	0.295538	0.531382		Septum site-determining protein MinD OS=Escherichia coli (strain B / BL21-DE3) OX=469008 GN=ECBD_2447 PE=4 SV=1
197	A0A140N9Q3	guaA	36	26	711	602	857	0.00171278	0.00150311	0.00218774		0.877585	1.2773	0.764363	0.86278	0.530995		GMP synthase [glutamine-hydrolyzing] OS=Escherichia coli (strain B / BL21-DE3) OX=469008 GN=guaA PE=3 SV=1
653	A0A140N5Q7	ygiF	14	10	65	55	50	0.000189853	0.000166506	0.000154759		0.877025	0.815152	0.550453	0.638454	0.530517		Adenylate cyclase OS=Escherichia coli (strain B / BL21-DE3) OX=469008 GN=ECBD_0687 PE=4 SV=1
839	A0A140N6N2	gpsA	8	8	39	33	25	0.000145498	0.000127605	9.88357e-05		0.877025	0.679294	0.458945	0.534054	0.530517		Glycerol-3-phosphate dehydrogenase [NAD(P)+] OS=Escherichia coli (strain B / BL21-DE3) OX=469008 GN=gpsA PE=3 SV=1
1238	A0A140N6I5	selD	9	6	39	33	16	0.000142143	0.000124663	6.17965e-05		0.877025	0.434748	0.458945	0.305085	0.530517		Selenide, water dikinase OS=Escherichia coli (strain B / BL21-DE3) OX=469008 GN=selD PE=3 SV=1
198	A0A140N8H2	yejK	14	10	39	33	47	0.000147235	0.000129129	0.00018803		0.877025	1.27707	0.817385	0.86271	0.530517		Nucleoid-associated protein YejK OS=Escherichia coli (strain B / BL21-DE3) OX=469008 GN=yejK PE=3 SV=1
966	A0A140N5Q1	ygjD	13	9	39	33	22	0.000146361	0.000128362	8.74916e-05		0.877025	0.597778	0.546333	0.462675	0.530517		tRNA N6-adenosine threonylcarbamoyltransferase OS=Escherichia coli (strain B / BL21-DE3) OX=469008 GN=tsaD PE=3 SV=1
1652	A0A140NHE6	alr	14	4	39	33	5	0.000137392	0.000120496	1.86659e-05		0.877025	0.135859	0.165865	0.0404182	0.530517		Alanine racemase OS=Escherichia coli (strain B / BL21-DE3) OX=469008 GN=ECBD_3980 PE=3 SV=1
880	A0A140NDE9	ycbX	9	7	26	22	16	8.91125e-05	7.81538e-05	5.81122e-05		0.877025	0.652122	0.641665	0.510947	0.530517		MOSC domain containing protein OS=Escherichia coli (strain B / BL21-DE3) OX=469008 GN=ECBD_2648 PE=4 SV=1
552	A0A140N997	ansA	5	3	13	11	11	4.86427e-05	4.26609e-05	4.36164e-05		0.877025	0.896668	0.458945	0.692014	0.530517		L-asparaginase, type I OS=Escherichia coli (strain B / BL21-DE3) OX=469008 GN=ECBD_1877 PE=4 SV=1
570	A0A140N6Z6	rpsQ	4	4	136	115	113	0.00204763	0.00179462	0.0018029		0.876438	0.880484	0.660891	0.681915	0.530018		30S ribosomal protein S17 OS=Escherichia coli (strain B / BL21-DE3) OX=469008 GN=rpsQ PE=3 SV=1
1197	A0A140N6R6	ghrB	9	7	58	49	25	0.000226399	0.000198246	0.000103411		0.87565	0.456766	0.523162	0.327109	0.529346		Glyoxylate/hydroxypyruvate reductase B OS=Escherichia coli (strain B / BL21-DE3) OX=469008 GN=ghrB PE=3 SV=1
1118	A0A140N6F1	hybC	24	18	216	182	101	0.000481795	0.000420767	0.000238733		0.873333	0.495507	0.421309	0.365486	0.527368		Cytochrome-c3 hydrogenase OS=Escherichia coli (strain B / BL21-DE3) OX=469008 GN=ECBD_0744 PE=3 SV=1
1462	A0A140N7Z8	folP	10	4	38	32	11	0.000170422	0.000148749	5.22778e-05		0.872828	0.306755	0.376396	0.178221	0.526937		Dihydropteroate synthase OS=Escherichia coli (strain B / BL21-DE3) OX=469008 GN=ECBD_0565 PE=3 SV=1
407	A0A140NBJ5	rcsF	3	4	25	21	23	0.000235954	0.000205432	0.000230036		0.870646	0.974922	0.547984	0.737237	0.525069		Outer membrane lipoprotein RcsF OS=Escherichia coli (strain B / BL21-DE3) OX=469008 GN=rcsF PE=3 SV=1
1247	A0A140NEH9	dnaT	8	5	25	21	10	0.000176636	0.000153787	7.48722e-05		0.870646	0.423879	0.214946	0.294183	0.525069		Primosomal protein 1 OS=Escherichia coli (strain B / BL21-DE3) OX=469008 GN=dnaT PE=3 SV=1
905	A0A140NDY8	psd	9	8	56	47	34	0.00021995	0.000191336	0.000141513		0.869906	0.643388	0.513884	0.503371	0.524435		Phosphatidylserine decarboxylase proenzyme OS=Escherichia coli (strain B / BL21-DE3) OX=469008 GN=psd PE=3 SV=1
869	A0A140NEV3	dxs	12	10	56	47	35	0.000114232	9.93711e-05	7.56571e-05		0.869906	0.662311	0.513884	0.519695	0.524435		1-deoxy-D-xylulose-5-phosphate synthase OS=Escherichia coli (strain B / BL21-DE3) OX=469008 GN=dxs PE=3 SV=1
709	A0A140NFR6	surA	22	22	143	120	104	0.000422555	0.000367529	0.000325659		0.869776	0.77069	0.570312	0.606371	0.524324		Chaperone SurA OS=Escherichia coli (strain B / BL21-DE3) OX=469008 GN=surA PE=3 SV=1
651	A0A140NBD3	aroG	12	11	87	73	67	0.000314371	0.000273406	0.000256555		0.869693	0.816089	0.612529	0.639109	0.524253		Phospho-2-dehydro-3-deoxyheptonate aldolase OS=Escherichia coli (strain B / BL21-DE3) OX=469008 GN=ECBD_2913 PE=3 SV=1
906	A0A140N587	arnA	27	26	341	286	207	0.000653434	0.000568036	0.000420339		0.869309	0.643277	0.665884	0.503274	0.523923		Bifunctional polymyxin resistance protein ArnA OS=Escherichia coli (strain B / BL21-DE3) OX=469008 GN=arnA PE=3 SV=1
278	A0A140NA84	pta	40	40	781	655	852	0.00138339	0.00120253	0.00159924		0.869266	1.15603	0.713046	0.82085	0.523886		Phosphate acetyltransferase OS=Escherichia coli (strain B / BL21-DE3) OX=469008 GN=ECBD_1362 PE=3 SV=1
874	A0A140N5R4	yhdH	13	10	37	31	23	0.000144427	0.000125421	9.51385e-05		0.868405	0.658731	0.720205	0.516633	0.523148		Quinone oxidoreductase, YhdH/YhfP family OS=Escherichia coli (strain B / BL21-DE3) OX=469008 GN=ECBD_0493 PE=4 SV=1
834	A0A140N5L9	cysK	20	16	277	232	178	0.0010846	0.000941541	0.000738569		0.868102	0.680961	0.540867	0.535448	0.522887		Cysteine synthase OS=Escherichia coli (strain B / BL21-DE3) OX=469008 GN=ECBD_1267 PE=3 SV=1
303	A0A140NBF5	serS	25	23	332	278	350	0.000976475	0.000847481	0.00109087		0.867899	1.11715	0.742942	0.805176	0.522713		Serine--tRNA ligase OS=Escherichia coli (strain B / BL21-DE3) OX=469008 GN=serS PE=3 SV=1
841	A0A140NEQ0	clpX	24	21	331	277	212	0.00098731	0.000856382	0.000670106		0.86739	0.678719	0.594076	0.533572	0.522276		ATP-dependent Clp protease ATP-binding subunit ClpX OS=Escherichia coli (strain B / BL21-DE3) OX=469008 GN=clpX PE=3 SV=1
1070	A0A140NFW5	creA	8	6	48	40	24	0.000386663	0.000333975	0.000204873		0.863736	0.529849	0.448849	0.398904	0.519132		Protein CreA OS=Escherichia coli (strain B / BL21-DE3) OX=469008 GN=ECBD_3623 PE=4 SV=1
152	A0A140NDZ1	poxB	5	5	6	5	8	1.32662e-05	1.14585e-05	1.87442e-05		0.863736	1.41293	0.938569	0.898978	0.519132		Thiamine pyrophosphate protein TPP binding domain protein OS=Escherichia coli (strain B / BL21-DE3) OX=469008 GN=ECBD_2723 PE=3 SV=1
732	A0A140NDI9	panB	5	4	48	40	34	0.000229948	0.000198614	0.000172603		0.863736	0.75062	0.756503	0.591221	0.519132		3-methyl-2-oxobutanoate hydroxymethyltransferase OS=Escherichia coli (strain B / BL21-DE3) OX=469008 GN=panB PE=3 SV=1
793	A0A140NAI2	yciH	4	4	12	10	8	0.000140523	0.000121375	9.9275e-05		0.863736	0.706465	0.891246	0.556436	0.519132		Translation initiation factor SUI1 OS=Escherichia coli (strain B / BL21-DE3) OX=469008 GN=ECBD_2337 PE=4 SV=1
836	A0A140NBZ7	azoR	6	3	18	15	8	0.000113258	9.78248e-05	5.33418e-05		0.863736	0.470977	0.0930352	0.341253	0.519132		FMN-dependent NADH-azoreductase OS=Escherichia coli (strain B / BL21-DE3) OX=469008 GN=azoR PE=3 SV=1
678	A0A140N5X6	nuoH	4	1	12	10	9	4.6697e-05	4.03339e-05	3.71136e-05		0.863736	0.794774	0.776522	0.624003	0.519132		NADH-quinone oxidoreductase subunit H OS=Escherichia coli (strain B / BL21-DE3) OX=469008 GN=nuoH PE=3 SV=1
832	A0A140NCS8	yaeQ	3	2	6	5	4	4.19241e-05	3.62114e-05	2.9618e-05		0.863736	0.706465	0.351139	0.556436	0.519132		YaeQ family protein OS=Escherichia coli (strain B / BL21-DE3) OX=469008 GN=ECBD_3428 PE=4 SV=1
565	A0A140NAX9	acrR	2	2	6	5	5	3.52943e-05	3.04849e-05	3.11677e-05		0.863736	0.883082	0.734989	0.683554	0.519132		Transcriptional regulator, TetR family OS=Escherichia coli (strain B / BL21-DE3) OX=469008 GN=ECBD_3192 PE=4 SV=1
1233	A0A140NCS1	amiB	6	3	12	10	5	3.41046e-05	2.94574e-05	1.50586e-05		0.863736	0.441541	0.687233	0.311891	0.519132		N-acetylmuramoyl-L-alanine amidase OS=Escherichia coli (strain B / BL21-DE3) OX=469008 GN=ECBD_3865 PE=4 SV=1
835	A0A140NB94	smtA	3	2	6	5	3	2.90738e-05	2.51121e-05	1.54047e-05		0.863736	0.529849	0.351139	0.398904	0.519132		tRNA 5-carboxymethoxyuridine methyltransferase OS=Escherichia coli (strain B / BL21-DE3) OX=469008 GN=cmoM PE=3 SV=1
941	A0A140NES8	mrdA	8	5	12	10	7	2.39756e-05	2.07086e-05	1.48207e-05		0.863736	0.618157	0.269906	0.481087	0.519132		Peptidoglycan D,D-transpeptidase MrdA OS=Escherichia coli (strain B / BL21-DE3) OX=469008 GN=mrdA PE=3 SV=1
827	A0A140N955	yfjD	4	3	6	5	6	1.80673e-05	1.56054e-05	1.91459e-05		0.863736	1.0597	0.503795	0.779818	0.519132		Uncharacterized protein OS=Escherichia coli (strain B / BL21-DE3) OX=469008 GN=ECBD_1074 PE=4 SV=1
684	A0A140N8C6	metG	35	29	363	302	270	0.000678124	0.000584753	0.000534501		0.862309	0.788205	0.624188	0.619254	0.5179		Methionine--tRNA ligase OS=Escherichia coli (strain B / BL21-DE3) OX=469008 GN=metG PE=3 SV=1
230	A0A140NH65	groL	45	45	3572	2967	4105	0.0082437	0.00709726	0.0100394		0.860931	1.21782	0.733037	0.843465	0.516711		60 kDa chaperonin OS=Escherichia coli (strain B / BL21-DE3) OX=469008 GN=groL PE=3 SV=1
939	A0A140NBS6	msbA	17	13	94	78	55	0.000204266	0.000175681	0.000126652		0.860061	0.620036	0.43148	0.482766	0.515959		Lipid A export ATP-binding/permease protein MsbA OS=Escherichia coli (strain B / BL21-DE3) OX=469008 GN=msbA PE=3 SV=1
241	A0A140N813	speB	8	8	117	97	132	0.000483566	0.000415532	0.000578131		0.859307	1.19556	0.716176	0.835628	0.515307		Agmatinase OS=Escherichia coli (strain B / BL21-DE3) OX=469008 GN=speB PE=3 SV=1
610	A0A140N7Q4	ppk	19	11	35	29	28	6.43385e-05	5.5254e-05	5.45435e-05		0.858801	0.847759	0.566108	0.660688	0.514868		Polyphosphate kinase OS=Escherichia coli (strain B / BL21-DE3) OX=469008 GN=ppk PE=3 SV=1
316	A0A140NAI0	prfA	12	14	58	48	59	0.000203759	0.00017478	0.000219646		0.85778	1.07797	0.706109	0.788176	0.513984		Peptide chain release factor 1 OS=Escherichia coli (strain B / BL21-DE3) OX=469008 GN=prfA PE=3 SV=1
376	A0A140N923	iscU	6	6	110	91	105	0.00108686	0.000931934	0.00109939		0.857455	1.01153	0.659406	0.756411	0.513703		Iron-sulfur cluster assembly scaffold protein IscU OS=Escherichia coli (strain B / BL21-DE3) OX=469008 GN=ECBD_1155 PE=3 SV=1
601	A0A140NAC7	ugd	26	24	156	129	126	0.000508492	0.000435825	0.000435224		0.857092	0.85591	0.706366	0.666077	0.513388		UDP-glucose 6-dehydrogenase OS=Escherichia coli (strain B / BL21-DE3) OX=469008 GN=ECBD_1631 PE=3 SV=1
726	A0A140NEC0	lysC	14	9	52	43	37	0.00014647	0.000125538	0.000110441		0.857092	0.754016	0.571668	0.593814	0.513388		Aspartokinase OS=Escherichia coli (strain B / BL21-DE3) OX=469008 GN=ECBD_4013 PE=3 SV=1
687	A0A140N347	secG	3	3	23	19	17	0.00026444	0.00022642	0.000207124		0.856226	0.783255	0.563187	0.615645	0.512637		Protein-export membrane protein SecG OS=Escherichia coli (strain B / BL21-DE3) OX=469008 GN=ECBD_0567 PE=3 SV=1
166	A0A140NHS0	atpD	35	33	1264	1044	1657	0.00347521	0.00297507	0.00482768		0.856083	1.38918	0.784694	0.893352	0.512513		ATP synthase subunit beta OS=Escherichia coli (strain B / BL21-DE3) OX=469008 GN=atpD PE=3 SV=1
582	A0A140NCG6	cydA	14	12	74	61	61	0.000179289	0.000153184	0.000156615		0.854399	0.873535	0.645189	0.677498	0.511051		Cytochrome bd ubiquinol oxidase subunit I OS=Escherichia coli (strain B / BL21-DE3) OX=469008 GN=ECBD_2928 PE=3 SV=1
854	A0A140NB50	minE	5	1	17	14	1	0.000244319	0.000208545	1.52297e-05		0.853575	0.0623352	0.103345	0.00823279	0.510334		Cell division topological specificity factor OS=Escherichia coli (strain B / BL21-DE3) OX=469008 GN=minE PE=3 SV=1
998	A0A140NC02	rsgA	9	6	51	42	28	0.000184287	0.000157302	0.000107217		0.853575	0.581795	0.626013	0.447988	0.510334		Small ribosomal subunit biogenesis GTPase RsgA OS=Escherichia coli (strain B / BL21-DE3) OX=469008 GN=rsgA PE=3 SV=1
770	A0A140SSA1	hemY	9	6	34	28	23	0.000108041	9.22208e-05	7.74495e-05		0.853575	0.716855	0.646262	0.564799	0.510334		HemY protein OS=Escherichia coli (strain B / BL21-DE3) OX=469008 GN=ECBD_4240 PE=4 SV=1
853	A0A140N9U0	narP	7	2	17	14	4	0.0001	8.53578e-05	2.49342e-05		0.853575	0.249341	0.265116	0.125357	0.510334		Two component transcriptional regulator, LuxR family OS=Escherichia coli (strain B / BL21-DE3) OX=469008 GN=ECBD_1467 PE=4 SV=1
423	A0A140NHJ4	uvrD	13	11	34	28	31	5.97225e-05	5.09776e-05	5.77036e-05		0.853575	0.966195	0.684221	0.732483	0.510334		DNA helicase OS=Escherichia coli (strain B / BL21-DE3) OX=469008 GN=ECBD_4228 PE=3 SV=1
199	A0A140NBA5	rpsA	62	63	4367	3595	5247	0.00991561	0.00846053	0.0126249		0.853254	1.27324	0.740933	0.861533	0.510055		30S ribosomal protein S1 OS=Escherichia coli (strain B / BL21-DE3) OX=469008 GN=ECBD_2684 PE=3 SV=1
806	A0A140NCM5	ydbK	25	19	67	55	44	7.21769e-05	6.14113e-05	5.02294e-05		0.850845	0.695921	0.545099	0.547838	0.507958		Pyruvate ferredoxin/flavodoxin oxidoreductase OS=Escherichia coli (strain B / BL21-DE3) OX=469008 GN=ECBD_2246 PE=3 SV=1
1071	A0A140N9V4	mqo	17	13	78	64	39	0.000180014	0.000153092	9.53801e-05		0.850448	0.529849	0.720979	0.398904	0.507612		Probable malate:quinone oxidoreductase OS=Escherichia coli (strain B / BL21-DE3) OX=469008 GN=mqo PE=3 SV=1
881	A0A140NFX8	dnaE	16	11	39	32	24	4.25205e-05	3.61615e-05	2.77285e-05		0.850448	0.652122	0.481645	0.510947	0.507612		DNA polymerase III subunit alpha OS=Escherichia coli (strain B / BL21-DE3) OX=469008 GN=ECBD_3435 PE=4 SV=1
566	A0A140NCP3	ybbN	12	12	72	59	60	0.000320631	0.000272325	0.000283143		0.849341	0.883082	0.538542	0.683554	0.506646		Thioredoxin domain protein OS=Escherichia coli (strain B / BL21-DE3) OX=469008 GN=ECBD_3164 PE=4 SV=1
846	A0A140NE54	ybeD	3	3	66	54	42	0.000959436	0.000813633	0.000646999		0.848032	0.674353	0.45056	0.529906	0.505504		UPF0250 protein YbeD OS=Escherichia coli (strain B / BL21-DE3) OX=469008 GN=ybeD PE=3 SV=1
607	A0A140NFE8	yihA	13	11	66	54	53	0.000397481	0.000337076	0.000338244		0.848032	0.85097	0.516613	0.662819	0.505504		Probable GTP-binding protein EngB OS=Escherichia coli (strain B / BL21-DE3) OX=469008 GN=engB PE=3 SV=1
847	A0A140NF40	yjeE	4	3	22	18	14	0.000181854	0.000154218	0.000122634		0.848032	0.674353	0.218434	0.529906	0.505504		Uncharacterized protein OS=Escherichia coli (strain B / BL21-DE3) OX=469008 GN=ECBD_3866 PE=4 SV=1
1320	A0A140N7N1	gst	6	3	22	18	8	0.000138426	0.00011739	5.33418e-05		0.848032	0.385345	0.262505	0.255518	0.505504		Glutathione S-transferase domain protein OS=Escherichia coli (strain B / BL21-DE3) OX=469008 GN=ECBD_2008 PE=4 SV=1
240	A0A140N4M5	suhB	16	14	170	139	192	0.000805247	0.000682429	0.000963748		0.847478	1.19684	0.621861	0.836087	0.50502		Inositol-1-monophosphatase OS=Escherichia coli (strain B / BL21-DE3) OX=469008 GN=ECBD_1151 PE=3 SV=1
595	A0A140SS76	purH	22	21	146	119	119	0.000349051	0.00029488	0.000301484		0.844805	0.863727	0.524928	0.671181	0.502681		Bifunctional purine biosynthesis protein PurH OS=Escherichia coli (strain B / BL21-DE3) OX=469008 GN=purH PE=3 SV=1
236	A0A140N989	srmB	19	18	108	88	123	0.000307632	0.000259809	0.000371275		0.844542	1.20688	0.669858	0.839656	0.502451		ATP-dependent RNA helicase SrmB OS=Escherichia coli (strain B / BL21-DE3) OX=469008 GN=srmB PE=3 SV=1
634	A0A140N880	cmoB	7	6	27	22	21	0.000105719	8.92841e-05	8.71345e-05		0.844542	0.82421	0.471622	0.64474	0.502451		tRNA U34 carboxymethyltransferase OS=Escherichia coli (strain B / BL21-DE3) OX=469008 GN=cmoB PE=3 SV=1
982	A0A140N8M8	sbcB	11	8	27	22	15	7.18889e-05	6.07132e-05	4.23225e-05		0.844542	0.588721	0.368945	0.454378	0.502451		Exodeoxyribonuclease I OS=Escherichia coli (strain B / BL21-DE3) OX=469008 GN=ECBD_1646 PE=4 SV=1
683	A0A140NBL6	moeA	8	5	43	35	32	0.000132318	0.00011163	0.000104347		0.843649	0.788613	0.449287	0.619549	0.501669		Molybdopterin molybdenumtransferase OS=Escherichia coli (strain B / BL21-DE3) OX=469008 GN=ECBD_2796 PE=3 SV=1
464	A0A140N4H3	rpsL	6	7	456	371	403	0.00465087	0.00392199	0.00435569		0.843279	0.936531	0.618983	0.715788	0.501344		30S ribosomal protein S12 OS=Escherichia coli (strain B / BL21-DE3) OX=469008 GN=rpsL PE=3 SV=1
396	A0A140NA53	apt	11	9	59	48	55	0.000407748	0.00034383	0.000402796		0.843241	0.987854	0.813466	0.74415	0.50131		Adenine phosphoribosyltransferase OS=Escherichia coli (strain B / BL21-DE3) OX=469008 GN=apt PE=3 SV=1
928	A0A140NG19	fre	5	4	32	26	19	0.000173694	0.000146275	0.000109288		0.842143	0.629196	0.290284	0.490907	0.500347		Oxidoreductase FAD/NAD(P)-binding domain protein OS=Escherichia coli (strain B / BL21-DE3) OX=469008 GN=ECBD_4181 PE=4 SV=1
267	A0A140NFV3	dnaK	68	63	2469	2003	2696	0.00489431	0.00411542	0.00566334		0.840857	1.15713	0.707452	0.821274	0.499218		Chaperone protein DnaK OS=Escherichia coli (strain B / BL21-DE3) OX=469008 GN=dnaK PE=2 SV=1
1185	A0A140NHP0	ilvE	8	10	151	122	66	0.00061803	0.000517553	0.000286259		0.837424	0.463179	0.544141	0.3335	0.496197		Branched-chain-amino-acid aminotransferase OS=Escherichia coli (strain B / BL21-DE3) OX=469008 GN=ilvE PE=3 SV=1
587	A0A140N6W9	alaS	62	58	1223	988	1004	0.00176569	0.00147845	0.00153604		0.837323	0.86994	0.619548	0.675194	0.496108		Alanine--tRNA ligase OS=Escherichia coli (strain B / BL21-DE3) OX=469008 GN=alaS PE=3 SV=1
1275	A0A140N8Y8	pntB	7	6	26	21	10	7.11742e-05	5.95842e-05	2.90089e-05		0.83716	0.407576	0.492791	0.277815	0.495965		NAD(P) transhydrogenase subunit beta OS=Escherichia coli (strain B / BL21-DE3) OX=469008 GN=ECBD_2044 PE=3 SV=1
1128	A0A140N332	mlaF	11	7	52	42	24	0.00024448	0.000204668	0.000119573		0.83716	0.489091	0.387943	0.359174	0.495965		ABC transporter related OS=Escherichia coli (strain B / BL21-DE3) OX=469008 GN=ECBD_0547 PE=4 SV=1
620	A0A140NDW9	dapD	19	20	436	352	343	0.00201246	0.00168401	0.00167771		0.836794	0.833662	0.722485	0.651209	0.495642		2,3,4,5-tetrahydropyridine-2,6-dicarboxylate N-succinyltransferase OS=Escherichia coli (strain B / BL21-DE3) OX=469008 GN=dapD PE=3 SV=1
1105	A0A140NAU7	frr	19	14	223	180	106	0.00152449	0.00127542	0.000767905		0.836624	0.503713	0.318493	0.373531	0.495492		Ribosome-recycling factor OS=Escherichia coli (strain B / BL21-DE3) OX=469008 GN=frr PE=3 SV=1
618	A0A140NEK4	hflC	23	22	202	163	159	0.000764885	0.000639727	0.000638005		0.83637	0.834119	0.624784	0.65152	0.495269		Modulator of FtsH protease HflC OS=Escherichia coli (strain B / BL21-DE3) OX=469008 GN=ECBD_3859 PE=3 SV=1
1152	A0A140SSB6	yigB	8	6	31	25	14	0.000164731	0.000137695	7.8836e-05		0.835874	0.478573	0.366656	0.348784	0.494831		HAD-superfamily hydrolase, subfamily IA, variant 1 OS=Escherichia coli (strain B / BL21-DE3) OX=469008 GN=ECBD_4229 PE=4 SV=1
1488	A0A140NG68	yacF	12	7	67	54	18	0.000343059	0.000286583	9.76673e-05		0.835375	0.284695	0.455855	0.157399	0.494391		Cell division protein ZapD OS=Escherichia coli (strain B / BL21-DE3) OX=469008 GN=zapD PE=3 SV=1
810	A0A140NAW9	adk	17	17	381	307	249	0.00225166	0.00188052	0.00155941		0.835172	0.692559	0.476509	0.545072	0.494212		Adenylate kinase OS=Escherichia coli (strain B / BL21-DE3) OX=469008 GN=adk PE=3 SV=1
1027	A0A140NF78	ftsN	14	11	36	29	19	0.000142726	0.000119168	7.98246e-05		0.834945	0.559285	0.429851	0.42696	0.494011		Cell division protein FtsN OS=Escherichia coli (strain B / BL21-DE3) OX=469008 GN=ftsN PE=3 SV=1
638	A0A140NAV7	ycfD	10	7	36	29	28	0.000122063	0.000101916	0.000100606		0.834945	0.82421	0.823115	0.64474	0.494011		Cupin 4 family protein OS=Escherichia coli (strain B / BL21-DE3) OX=469008 GN=ECBD_2471 PE=4 SV=1
540	A0A140N9V8	pykF	30	26	334	269	286	0.000898752	0.000750254	0.000815533		0.834773	0.907406	0.675767	0.698572	0.493859		Pyruvate kinase OS=Escherichia coli (strain B / BL21-DE3) OX=469008 GN=ECBD_1969 PE=3 SV=1
890	A0A140ND88	aroA	17	12	82	66	50	0.000242872	0.000202614	0.000156934		0.834243	0.646157	0.397689	0.505781	0.493391		3-phosphoshikimate 1-carboxyvinyltransferase OS=Escherichia coli (strain B / BL21-DE3) OX=469008 GN=aroA PE=3 SV=1
788	A0A140N4Y8	recA	19	15	239	192	160	0.000856278	0.000712985	0.000607462		0.832656	0.709421	0.513254	0.558827	0.491989		Protein RecA OS=Escherichia coli (strain B / BL21-DE3) OX=469008 GN=recA PE=3 SV=1
786	A0A140N5S7	prmB	6	6	55	44	37	0.000224384	0.000186056	0.000159961		0.829187	0.712888	0.682568	0.561619	0.488917		50S ribosomal protein L3 glutamine methyltransferase OS=Escherichia coli (strain B / BL21-DE3) OX=469008 GN=prmB PE=3 SV=1
1072	A0A140N739	trxC	4	3	20	16	10	0.000181973	0.00015089	9.64181e-05		0.829187	0.529849	0.489462	0.398904	0.488917		Thioredoxin OS=Escherichia coli (strain B / BL21-DE3) OX=469008 GN=ECBD_1098 PE=3 SV=1
717	A0A140NBC7	mukE	11	8	25	20	18	0.000135119	0.000112039	0.000103093		0.829187	0.762983	0.774974	0.600602	0.488917		Chromosome partition protein MukE OS=Escherichia coli (strain B / BL21-DE3) OX=469008 GN=mukE PE=3 SV=1
1096	A0A140NDX6	rffG	6	4	25	20	12	8.90642e-05	7.38508e-05	4.53029e-05		0.829187	0.508655	0.408216	0.378358	0.488917		dTDP-glucose 4,6-dehydratase OS=Escherichia coli (strain B / BL21-DE3) OX=469008 GN=ECBD_4251 PE=3 SV=1
1023	A0A140NAR4	dkgB	6	4	15	12	8	7.10512e-05	5.89147e-05	4.01562e-05		0.829187	0.565172	0.318784	0.432497	0.488917		Aldo/keto reductase OS=Escherichia coli (strain B / BL21-DE3) OX=469008 GN=ECBD_3417 PE=4 SV=1
900	A0A140NDC8	rnhB	4	2	10	8	4	6.38743e-05	5.29637e-05	2.7075e-05		0.829187	0.423879	0.0763837	0.294183	0.488917		Ribonuclease HII OS=Escherichia coli (strain B / BL21-DE3) OX=469008 GN=rnhB PE=3 SV=1
902	A0A140SS78	nudC	4	1	10	8	2	4.92106e-05	4.08047e-05	1.04297e-05		0.829187	0.21194	0.445075	0.0938202	0.488917		NADH pyrophosphatase OS=Escherichia coli (strain B / BL21-DE3) OX=469008 GN=nudC PE=3 SV=1
891	A0A140N9P7	ybl50	1	1	5	4	5	3.51309e-05	2.91301e-05	3.72281e-05		0.829187	1.0597	0.609201	0.779818	0.488917		Tail Collar domain protein OS=Escherichia coli (strain B / BL21-DE3) OX=469008 GN=ECBD_2751 PE=4 SV=1
893	A0A140N9J6	yfcN	1	3	5	4	4	3.4555e-05	2.86525e-05	2.92943e-05		0.829187	0.847759	0.609201	0.660688	0.488917		UPF0115 protein YfcN OS=Escherichia coli (strain B / BL21-DE3) OX=469008 GN=yfcN PE=3 SV=1
896	A0A140NE45	ftsQ	3	3	5	4	3	2.29114e-05	1.89979e-05	1.45675e-05		0.829187	0.635819	0.825202	0.496747	0.488917		Cell division protein FtsQ OS=Escherichia coli (strain B / BL21-DE3) OX=469008 GN=ftsQ PE=3 SV=1
901	A0A140SS99	xerC	4	2	5	4	2	2.122e-05	1.75953e-05	8.99471e-06		0.829187	0.423879	0.609201	0.294183	0.488917		Tyrosine recombinase XerC OS=Escherichia coli (strain B / BL21-DE3) OX=469008 GN=xerC PE=3 SV=1
889	A0A140NA98	yciM	3	4	5	4	6	1.62559e-05	1.34792e-05	2.06717e-05		0.829187	1.27164	0.734989	0.861038	0.488917		Lipopolysaccharide assembly protein B OS=Escherichia coli (strain B / BL21-DE3) OX=469008 GN=lapB PE=3 SV=1
232	A0A140N8E1	pgk	29	27	795	636	911	0.00259805	0.00215427	0.00315487		0.829187	1.21432	0.669322	0.842255	0.488917		Phosphoglycerate kinase OS=Escherichia coli (strain B / BL21-DE3) OX=469008 GN=pgk PE=3 SV=1
892	A0A140SS69	gldA	5	3	10	8	8	3.44608e-05	2.85744e-05	2.92144e-05		0.829187	0.847759	0.253638	0.660688	0.488917		Iron-containing alcohol dehydrogenase OS=Escherichia coli (strain B / BL21-DE3) OX=469008 GN=ECBD_4078 PE=4 SV=1
904	A0A140NCN6	yiiQ	3	1	5	4	1	3.17767e-05	2.63488e-05	6.73473e-06		0.829187	0.21194	0.253638	0.0938202	0.488917		Uncharacterized protein OS=Escherichia coli (strain B / BL21-DE3) OX=469008 GN=ECBD_4104 PE=4 SV=1
903	A0A140N732	gntR	2	1	5	4	1	1.91044e-05	1.58411e-05	4.04898e-06		0.829187	0.21194	0.445075	0.0938202	0.488917		Transcriptional regulator, LacI family OS=Escherichia coli (strain B / BL21-DE3) OX=469008 GN=ECBD_0305 PE=4 SV=1
290	A0A140NC97	ahpC	16	17	1178	941	1259	0.00796701	0.00659632	0.00902314		0.827955	1.13256	0.758994	0.811527	0.487825		Alkyl hydroperoxide reductase C OS=Escherichia coli (strain B / BL21-DE3) OX=469008 GN=ECBD_3047 PE=1 SV=1
751	A0A140N560	nuoB	11	11	163	130	113	0.000937036	0.000774595	0.000688382		0.826643	0.734637	0.49503	0.57886	0.48666		NADH-quinone oxidoreductase subunit B OS=Escherichia coli (strain B / BL21-DE3) OX=469008 GN=nuoB PE=3 SV=1
1456	A0A140NAD5	yeeZ	9	4	34	27	10	0.000156935	0.000129172	4.89129e-05		0.82309	0.311676	0.127752	0.182936	0.4835		NAD-dependent epimerase/dehydratase OS=Escherichia coli (strain B / BL21-DE3) OX=469008 GN=ECBD_1641 PE=4 SV=1
373	A0A140N6P6	serA	14	15	116	92	111	0.000357821	0.000294143	0.000362838		0.822039	1.01402	0.628857	0.757672	0.482563		D-isomer specific 2-hydroxyacid dehydrogenase NAD-binding OS=Escherichia coli (strain B / BL21-DE3) OX=469008 GN=ECBD_0825 PE=3 SV=1
1360	A0A140NCI4	purK	7	4	29	23	10	0.000103314	8.49285e-05	3.77525e-05		0.822039	0.365413	0.367722	0.235616	0.482563		N5-carboxyaminoimidazole ribonucleotide synthase OS=Escherichia coli (strain B / BL21-DE3) OX=469008 GN=purK PE=3 SV=1
733	A0A140N7F3	yffB	6	5	24	19	17	0.000257229	0.000211069	0.000193081		0.82055	0.75062	0.503795	0.591221	0.481235		Arsenate reductase and related OS=Escherichia coli (strain B / BL21-DE3) OX=469008 GN=ECBD_1219 PE=3 SV=1
1031	A0A140NAC1	wbbB	6	3	19	15	10	8.80202e-05	7.20249e-05	4.9092e-05		0.818277	0.557736	0.325621	0.425499	0.479205		Uncharacterized protein OS=Escherichia coli (strain B / BL21-DE3) OX=469008 GN=ECBD_1622 PE=4 SV=1
692	A0A140N6R4	recJ	9	7	19	15	14	4.16456e-05	3.40776e-05	3.25181e-05		0.818277	0.78083	0.561387	0.613868	0.479205		Single-stranded-DNA-specific exonuclease RecJ OS=Escherichia coli (strain B / BL21-DE3) OX=469008 GN=ECBD_0845 PE=4 SV=1
780	A0A140N4E7	mscS	7	7	52	41	35	0.000229948	0.000187919	0.000164012		0.817227	0.713258	0.614757	0.561917	0.478268		MscS Mechanosensitive ion channel OS=Escherichia coli (strain B / BL21-DE3) OX=469008 GN=ECBD_0814 PE=4 SV=1
1044	A0A140NBR4	mukB	54	39	189	149	98	0.000160855	0.000131438	8.83855e-05		0.817122	0.549473	0.543376	0.417675	0.478173		Chromosome partition protein MukB OS=Escherichia coli (strain B / BL21-DE3) OX=469008 GN=mukB PE=3 SV=1
1332	A0A140NFR9	atpE	2	1	14	11	5	0.000224126	0.000182524	8.48236e-05		0.81438	0.378464	0.212212	0.248634	0.475718		ATP synthase subunit c OS=Escherichia coli (strain B / BL21-DE3) OX=469008 GN=atpE PE=3 SV=1
925	A0A140N465	dfp	13	7	42	33	25	0.000130832	0.000106547	8.25254e-05		0.81438	0.630773	0.483246	0.492301	0.475718		Coenzyme A biosynthesis bifunctional protein CoaBC OS=Escherichia coli (strain B / BL21-DE3) OX=469008 GN=ECBD_0087 PE=3 SV=1
156	A0A140NA92	fabF	16	16	916	719	1209	0.00280503	0.00228209	0.00392328		0.813572	1.39866	0.772789	0.895632	0.474994		3-oxoacyl-[acyl-carrier-protein] synthase 2 OS=Escherichia coli (strain B / BL21-DE3) OX=469008 GN=ECBD_2506 PE=3 SV=1
725	A0A140N6N0	pheS	21	18	274	215	195	0.00105973	0.000861876	0.000799209		0.813299	0.754165	0.608671	0.593927	0.47475		Phenylalanine--tRNA ligase alpha subunit OS=Escherichia coli (strain B / BL21-DE3) OX=469008 GN=pheS PE=3 SV=1
541	A0A140N5L3	ftsH	40	42	438	343	375	0.000856172	0.000694934	0.000776785		0.811676	0.907276	0.623268	0.698493	0.473293		ATP-dependent zinc metalloprotease FtsH OS=Escherichia coli (strain B / BL21-DE3) OX=469008 GN=ftsH PE=3 SV=1
1509	A0A140N6D4	ygiQ	13	4	23	18	6	3.93618e-05	3.19287e-05	1.08813e-05		0.811161	0.276443	0.413084	0.149759	0.472831		UPF0313 protein YgiQ OS=Escherichia coli (strain B / BL21-DE3) OX=469008 GN=ygiQ PE=3 SV=1
1410	A0A140NBQ7	yniC	7	4	46	36	14	0.000262057	0.000212571	8.45179e-05		0.811161	0.322517	0.0732656	0.193401	0.472831		HAD-superfamily hydrolase, subfamily IA, variant 3 OS=Escherichia coli (strain B / BL21-DE3) OX=469008 GN=ECBD_1918 PE=4 SV=1
1184	A0A140SSB4	yigI	6	5	32	25	14	0.000261102	0.000211428	0.000121051		0.809753	0.463618	0.43939	0.333936	0.471565		Thioesterase superfamily protein OS=Escherichia coli (strain B / BL21-DE3) OX=469008 GN=ECBD_4218 PE=4 SV=1
554	A0A140NBZ3	hflK	26	25	246	192	207	0.000742527	0.000600677	0.00066211		0.808963	0.891697	0.635668	0.68894	0.470855		Protein HflK OS=Escherichia coli (strain B / BL21-DE3) OX=469008 GN=ECBD_3860 PE=3 SV=1
781	A0A140NAR3	cysS	24	20	217	169	146	0.00059532	0.000480551	0.000424449		0.807215	0.712977	0.371068	0.56169	0.469283		Cysteine--tRNA ligase OS=Escherichia coli (strain B / BL21-DE3) OX=469008 GN=cysS PE=3 SV=1
1123	A0A140NER9	polA	41	27	176	137	82	0.000239859	0.00019352	0.000118424		0.806808	0.493723	0.49731	0.363733	0.468916		DNA polymerase I OS=Escherichia coli (strain B / BL21-DE3) OX=469008 GN=polA PE=3 SV=1
680	A0A140N821	fbaA	19	19	527	410	393	0.00185655	0.00149707	0.00146714		0.806372	0.790249	0.547313	0.620736	0.468523		Fructose-bisphosphate aldolase OS=Escherichia coli (strain B / BL21-DE3) OX=469008 GN=ECBD_0813 PE=3 SV=1
1460	A0A140NGA3	yifE	12	11	279	217	81	0.00315049	0.00253978	0.000969261		0.806154	0.307654	0.122106	0.179081	0.468326		Uncharacterized protein OS=Escherichia coli (strain B / BL21-DE3) OX=469008 GN=ECBD_4273 PE=4 SV=1
1086	A0A140N3U1	ygfZ	22	13	171	133	85	0.000663392	0.000534796	0.000349442		0.806154	0.526751	0.336989	0.395917	0.468326		tRNA-modifying protein YgfZ OS=Escherichia coli (strain B / BL21-DE3) OX=469008 GN=ygfZ PE=3 SV=1
1173	A0A140NCE2	proC	5	3	45	35	20	0.000211569	0.000170557	9.9644e-05		0.806154	0.470977	0.340392	0.341253	0.468326		Pyrroline-5-carboxylate reductase OS=Escherichia coli (strain B / BL21-DE3) OX=469008 GN=proC PE=3 SV=1
1481	A0A140NA96	yajL	4	2	18	14	5	0.000116147	9.36323e-05	3.41891e-05		0.806154	0.294361	0.297078	0.166455	0.468326		DJ-1 family protein OS=Escherichia coli (strain B / BL21-DE3) OX=469008 GN=ECBD_3237 PE=4 SV=1
1267	A0A140N568	yheO	6	2	18	14	7	9.48533e-05	7.64664e-05	3.90895e-05		0.806154	0.412105	0.242829	0.282362	0.468326		YheO domain protein OS=Escherichia coli (strain B / BL21-DE3) OX=469008 GN=ECBD_0403 PE=4 SV=1
35	A0A140NFH2	metI	2	2	9	7	18	5.24535e-05	4.22856e-05	0.00011117		0.806154	2.1194	0.869138	0.981423	0.468326		Binding-protein-dependent transport systems inner membrane component OS=Escherichia coli (strain B / BL21-DE3) OX=469008 GN=ECBD_3420 PE=3 SV=1
934	A0A140ND41	ybbO	4	1	9	7	1	4.44625e-05	3.58436e-05	5.2352e-06		0.806154	0.117744	0.404055	0.0304499	0.468326		Short-chain dehydrogenase/reductase SDR OS=Escherichia coli (strain B / BL21-DE3) OX=469008 GN=ECBD_3163 PE=4 SV=1
930	A0A140N7S0	mepA	3	2	9	7	4	4.15416e-05	3.34889e-05	1.95651e-05		0.806154	0.470977	0.297078	0.341253	0.468326		Penicillin-insensitive murein endopeptidase OS=Escherichia coli (strain B / BL21-DE3) OX=469008 GN=mepA PE=3 SV=1
524	A0A140NCR3	fdhE	8	5	22	17	19	9.00442e-05	7.21181e-05	8.24079e-05		0.800919	0.915194	0.262505	0.703256	0.463601		Protein FdhE OS=Escherichia coli (strain B / BL21-DE3) OX=469008 GN=fdhE PE=3 SV=1
1073	A0A140N7T3	yhcM	7	6	22	17	11	7.41964e-05	5.94253e-05	3.93129e-05		0.800919	0.529849	0.436796	0.398904	0.463601		Cell division protein ZapE OS=Escherichia coli (strain B / BL21-DE3) OX=469008 GN=zapE PE=3 SV=1
532	A0A140NF95	eptA	13	11	113	87	97	0.000261266	0.00020849	0.000237661		0.798001	0.909652	0.545419	0.699929	0.46096		Sulfatase OS=Escherichia coli (strain B / BL21-DE3) OX=469008 GN=ECBD_3917 PE=4 SV=1
1357	A0A140NE95	rnk	4	3	26	20	9	0.000241783	0.000192772	8.86905e-05		0.797295	0.366819	0.0997359	0.237015	0.460321		Regulator of nucleoside diphosphate kinase OS=Escherichia coli (strain B / BL21-DE3) OX=469008 GN=rnk PE=3 SV=1
946	A0A140NFA1	cpxR	10	8	78	60	45	0.000425205	0.000339014	0.000259955		0.797295	0.611364	0.423944	0.47499	0.460321		Two component transcriptional regulator, winged helix family OS=Escherichia coli (strain B / BL21-DE3) OX=469008 GN=ECBD_4111 PE=4 SV=1
404	A0A140NCK3	ycgK	7	6	39	30	36	0.000370855	0.000295681	0.000362764		0.797295	0.978183	0.807183	0.738994	0.460321		Peptidase domain protein OS=Escherichia coli (strain B / BL21-DE3) OX=469008 GN=ECBD_2444 PE=4 SV=1
1277	A0A140NDH6	ycaR	4	2	13	10	5	0.000274021	0.000218475	0.000111684		0.797295	0.407576	0.387943	0.277815	0.460321		UPF0434 protein YcaR OS=Escherichia coli (strain B / BL21-DE3) OX=469008 GN=ycaR PE=3 SV=1
1278	A0A140NFE4	yjcD	2	1	13	10	5	3.66175e-05	2.91949e-05	1.49244e-05		0.797295	0.407576	0.691138	0.277815	0.460321		Xanthine/uracil/vitamin C permease OS=Escherichia coli (strain B / BL21-DE3) OX=469008 GN=ECBD_3968 PE=4 SV=1
654	A0A140N6A5	clpB	59	53	631	485	485	0.000931194	0.000741848	0.000758463		0.796663	0.814506	0.609431	0.638003	0.459748		Chaperone protein ClpB OS=Escherichia coli (strain B / BL21-DE3) OX=469008 GN=clpB PE=3 SV=1
932	A0A140N7E4	bcp	7	6	108	83	64	0.000875569	0.000697441	0.000549831		0.796557	0.627969	0.495862	0.489822	0.459652		Peroxiredoxin OS=Escherichia coli (strain B / BL21-DE3) OX=469008 GN=ECBD_1209 PE=4 SV=1
1427	A0A140NBS2	yjgF	8	7	185	142	56	0.0018279	0.00145423	0.000586343		0.795571	0.320773	0.0476758	0.191711	0.458758		Endoribonuclease L-PSP OS=Escherichia coli (strain B / BL21-DE3) OX=469008 GN=ECBD_3790 PE=4 SV=1
1124	A0A140N737	yfbU	12	11	116	89	54	0.000894552	0.000711377	0.000441289		0.795233	0.493308	0.530301	0.363324	0.458451		UPF0304 protein YfbU OS=Escherichia coli (strain B / BL21-DE3) OX=469008 GN=yfbU PE=3 SV=1
1195	A0A140N8D9	queF	13	8	60	46	26	0.000269088	0.000213827	0.000123566		0.794637	0.459203	0.286207	0.329538	0.457911		NADPH-dependent 7-cyano-7-deazaguanine reductase OS=Escherichia coli (strain B / BL21-DE3) OX=469008 GN=queF PE=3 SV=1
1299	A0A140NCA7	ribA	7	7	64	49	24	0.000412967	0.000327713	0.000164108		0.793558	0.397387	0.184758	0.267588	0.45693		GTP cyclohydrolase-2 OS=Escherichia coli (strain B / BL21-DE3) OX=469008 GN=ribA PE=3 SV=1
1000	A0A140NDV9	talB	26	24	634	485	348	0.00252942	0.00200556	0.00147127		0.792894	0.581664	0.440199	0.447867	0.456327		Transaldolase OS=Escherichia coli (strain B / BL21-DE3) OX=469008 GN=tal PE=3 SV=1
1106	A0A140N9A4	crr	10	9	251	192	119	0.00187836	0.00148925	0.0009437		0.792848	0.502407	0.298809	0.372252	0.456286		PTS system, glucose subfamily, IIA subunit OS=Escherichia coli (strain B / BL21-DE3) OX=469008 GN=ECBD_1264 PE=4 SV=1
800	A0A140N7D0	ligA	26	21	136	104	90	0.000256335	0.000203172	0.00017976		0.792605	0.701271	0.474027	0.552214	0.456065		DNA ligase OS=Escherichia coli (strain B / BL21-DE3) OX=469008 GN=ligA PE=3 SV=1
1112	A0A140NAH1	ychN	3	3	17	13	8	0.000183761	0.00014565	9.16384e-05		0.792605	0.498681	0.665662	0.368602	0.456065		DsrE family protein OS=Escherichia coli (strain B / BL21-DE3) OX=469008 GN=ECBD_2400 PE=4 SV=1
1113	A0A140N8G9	cysJ	10	5	17	13	8	3.58933e-05	2.84492e-05	1.78993e-05		0.792605	0.498681	0.265116	0.368602	0.456065		Sulfite reductase [NADPH] flavoprotein alpha-component OS=Escherichia coli (strain B / BL21-DE3) OX=469008 GN=cysJ PE=3 SV=1
1074	A0A140NB97	ycfH	11	13	80	61	40	0.0003818	0.000301743	0.000202296		0.790319	0.529849	0.489462	0.398904	0.453986		Hydrolase, TatD family OS=Escherichia coli (strain B / BL21-DE3) OX=469008 GN=ECBD_2501 PE=4 SV=1
1025	A0A140SS75	pfkA	12	14	122	93	65	0.000482171	0.000380967	0.000272231		0.790106	0.564593	0.555584	0.431954	0.453792		ATP-dependent 6-phosphofructokinase OS=Escherichia coli (strain B / BL21-DE3) OX=469008 GN=pfkA PE=3 SV=1
804	A0A140ND68	aspC	29	25	432	329	285	0.00137969	0.00108907	0.000964547		0.789359	0.699106	0.429851	0.550447	0.453112		Aminotransferase OS=Escherichia coli (strain B / BL21-DE3) OX=469008 GN=ECBD_2667 PE=3 SV=1
1009	A0A140N956	mdoH	15	10	46	35	25	6.95062e-05	5.48146e-05	4.00302e-05		0.788629	0.575923	0.452937	0.442541	0.452447		Glucans biosynthesis glucosyltransferase H OS=Escherichia coli (strain B / BL21-DE3) OX=469008 GN=mdoH PE=3 SV=1
1295	A0A140NFG9	ubiD	14	8	50	38	19	0.000127235	0.000100226	5.12355e-05		0.787728	0.402685	0.426783	0.272905	0.451626		3-octaprenyl-4-hydroxybenzoate carboxy-lyase OS=Escherichia coli (strain B / BL21-DE3) OX=469008 GN=ubiD PE=3 SV=1
611	A0A140N3C3	rlmG	6	7	25	19	20	8.36449e-05	6.58894e-05	7.09107e-05		0.787728	0.847759	0.755672	0.660688	0.451626		Ribosomal RNA large subunit methyltransferase G OS=Escherichia coli (strain B / BL21-DE3) OX=469008 GN=rlmG PE=3 SV=1
1248	A0A140NAY4	pabB	8	3	25	19	10	6.97964e-05	5.49806e-05	2.95853e-05		0.787728	0.423879	0.370363	0.294183	0.451626		Para-aminobenzoate synthase, subunit I OS=Escherichia coli (strain B / BL21-DE3) OX=469008 GN=ECBD_1830 PE=4 SV=1
598	A0A140N7C3	argG	31	25	244	185	198	0.000690357	0.000542523	0.000593651		0.785858	0.859919	0.501462	0.668703	0.449921		Argininosuccinate synthase OS=Escherichia coli (strain B / BL21-DE3) OX=469008 GN=argG PE=3 SV=1
244	A0A140N731	rodZ	9	9	74	56	83	0.000277711	0.000217827	0.000330082		0.784366	1.18858	0.607235	0.833101	0.448559		Cytoskeleton protein RodZ OS=Escherichia coli (strain B / BL21-DE3) OX=469008 GN=rodZ PE=3 SV=1
1183	A0A140N4R0	grxC	5	4	41	31	18	0.000624737	0.000489596	0.000290648		0.783683	0.465233	0.110324	0.335544	0.447935		Glutaredoxin OS=Escherichia coli (strain B / BL21-DE3) OX=469008 GN=ECBD_0115 PE=3 SV=1
629	A0A140N6F6	prlC	39	33	311	235	243	0.000578419	0.000453015	0.000478929		0.783195	0.827996	0.60733	0.647342	0.447489		Oligopeptidase A OS=Escherichia coli (strain B / BL21-DE3) OX=469008 GN=ECBD_0243 PE=3 SV=1
395	A0A140N457	gmk	7	9	45	34	42	0.000274937	0.000215309	0.000271927		0.783121	0.989052	0.669858	0.744783	0.447422		Guanylate kinase OS=Escherichia coli (strain B / BL21-DE3) OX=469008 GN=gmk PE=3 SV=1
1174	A0A140N8X2	phoP	8	7	45	34	20	0.000255211	0.000199861	0.000120198		0.783121	0.470977	0.558617	0.341253	0.447422		Two component transcriptional regulator, winged helix family OS=Escherichia coli (strain B / BL21-DE3) OX=469008 GN=ECBD_2469 PE=4 SV=1
644	A0A140NHF3	tatA	10	7	53	40	41	0.000753143	0.000589147	0.000617401		0.782252	0.819766	0.482068	0.641667	0.446627		Sec-independent protein translocase protein TatA OS=Escherichia coli (strain B / BL21-DE3) OX=469008 GN=tatA PE=3 SV=1
1150	A0A140N385	gntT	5	2	53	40	24	0.000153036	0.000119713	7.34363e-05		0.782252	0.479863	0.560604	0.350061	0.446627		Gluconate transporter OS=Escherichia coli (strain B / BL21-DE3) OX=469008 GN=ECBD_0330 PE=4 SV=1
420	A0A140NF24	hupA	9	9	269	203	246	0.00378008	0.0029567	0.00366325		0.782179	0.969092	0.779233	0.734069	0.446561		Histone family protein DNA-binding protein OS=Escherichia coli (strain B / BL21-DE3) OX=469008 GN=ECBD_4032 PE=3 SV=1
619	A0A140N9E5	gltX	31	25	394	296	310	0.00105795	0.000823805	0.000882093		0.778678	0.833773	0.666239	0.651285	0.443357		Glutamate--tRNA ligase OS=Escherichia coli (strain B / BL21-DE3) OX=469008 GN=gltX PE=3 SV=1
1368	A0A140N530	yfcL	3	3	24	18	8	0.000329925	0.000256471	0.00011654		0.777363	0.353233	0.0824915	0.223524	0.442151		YfcL protein OS=Escherichia coli (strain B / BL21-DE3) OX=469008 GN=ECBD_1334 PE=4 SV=1
714	A0A140N717	dedD	6	6	36	27	26	0.000206953	0.000160877	0.000158389		0.777363	0.765338	0.0724081	0.602372	0.442151		Cell division protein DedD OS=Escherichia coli (strain B / BL21-DE3) OX=469008 GN=dedD PE=3 SV=1
1378	A0A140N914	ydjA	6	4	28	21	9	0.000193508	0.000150426	6.59121e-05		0.777363	0.340617	0.385338	0.211079	0.442151		Nitroreductase OS=Escherichia coli (strain B / BL21-DE3) OX=469008 GN=ECBD_1879 PE=4 SV=1
635	A0A140NAA3	ribD	10	10	36	27	28	0.000124059	9.64387e-05	0.000102251		0.777363	0.82421	0.503795	0.64474	0.442151		Riboflavin biosynthesis protein RibD OS=Escherichia coli (strain B / BL21-DE3) OX=469008 GN=ECBD_3247 PE=3 SV=1
831	A0A140NCH2	oppF	9	6	28	21	18	0.000106024	8.24189e-05	7.2227e-05		0.777363	0.681235	0.672386	0.535677	0.442151		Oligopeptide/dipeptide ABC transporter, ATPase subunit OS=Escherichia coli (strain B / BL21-DE3) OX=469008 GN=ECBD_2375 PE=3 SV=1
990	A0A140NHR0	mioC	2	1	12	9	2	0.000103242	8.02563e-05	1.82342e-05		0.777363	0.176616	0.0537784	0.0669504	0.442151		Flavodoxin/nitric oxide synthase OS=Escherichia coli (strain B / BL21-DE3) OX=469008 GN=ECBD_4290 PE=4 SV=1
1300	A0A140NC74	uspE	7	4	24	18	9	9.6054e-05	7.46688e-05	3.81706e-05		0.777363	0.397387	0.115353	0.267588	0.442151		UspA domain protein OS=Escherichia coli (strain B / BL21-DE3) OX=469008 GN=ECBD_2284 PE=4 SV=1
980	A0A140NEE9	trpR	4	2	8	6	4	9.36823e-05	7.28251e-05	4.96375e-05		0.777363	0.529849	0.115353	0.398904	0.442151		Trp operon repressor OS=Escherichia coli (strain B / BL21-DE3) OX=469008 GN=trpR PE=3 SV=1
989	A0A140N417	mug	6	2	12	9	2	9.03365e-05	7.02242e-05	1.59549e-05		0.777363	0.176616	0.351139	0.0669504	0.442151		G/U mismatch-specific DNA glycosylase OS=Escherichia coli (strain B / BL21-DE3) OX=469008 GN=mug PE=3 SV=1
975	A0A140NC75	pspB	2	1	4	3	3	6.83628e-05	5.31427e-05	5.43329e-05		0.777363	0.794774	0.115353	0.624003	0.442151		Phage shock protein B OS=Escherichia coli (strain B / BL21-DE3) OX=469008 GN=ECBD_2312 PE=4 SV=1
969	A0A140NG90	rep	12	9	32	24	18	6.01349e-05	4.67466e-05	3.58452e-05		0.777363	0.59608	0.290284	0.461125	0.442151		ATP-dependent DNA helicase Rep OS=Escherichia coli (strain B / BL21-DE3) OX=469008 GN=rep PE=3 SV=1
870	A0A140NC43	ybgK	5	4	8	6	5	3.26377e-05	2.53713e-05	2.16163e-05		0.777363	0.662311	0.571668	0.519695	0.442151		Urea amidolyase related protein OS=Escherichia coli (strain B / BL21-DE3) OX=469008 GN=ECBD_2949 PE=4 SV=1
981	A0A140N9N4	yfbR	2	2	4	3	2	2.54213e-05	1.97616e-05	1.34695e-05		0.777363	0.529849	0.351139	0.398904	0.442151		5'-deoxynucleotidase YfbR OS=Escherichia coli (strain B / BL21-DE3) OX=469008 GN=yfbR PE=3 SV=1
485	A0A140NCT9	ycjM	1	1	8	6	7	1.80996e-05	1.407e-05	1.67826e-05		0.777363	0.927236	0.660891	0.710383	0.442151		Alpha amylase catalytic region OS=Escherichia coli (strain B / BL21-DE3) OX=469008 GN=ECBD_2308 PE=4 SV=1
972	A0A140N9Z1	ydhJ	3	3	4	3	5	1.77503e-05	1.37984e-05	2.35125e-05		0.777363	1.32462	0.909875	0.876575	0.442151		Secretion protein HlyD family protein OS=Escherichia coli (strain B / BL21-DE3) OX=469008 GN=ECBD_1999 PE=3 SV=1
985	A0A140NA08	yehX	2	1	4	3	1	1.64248e-05	1.2768e-05	4.35134e-06		0.777363	0.264925	0.115353	0.139251	0.442151		ABC transporter related OS=Escherichia coli (strain B / BL21-DE3) OX=469008 GN=ECBD_1529 PE=4 SV=1
988	A0A140N462	recF	3	1	4	3	1	1.41704e-05	1.10156e-05	3.7541e-06		0.777363	0.264925	0.972162	0.139251	0.442151		DNA replication and repair protein RecF OS=Escherichia coli (strain B / BL21-DE3) OX=469008 GN=recF PE=3 SV=1
986	A0A140NCY3	yaiW	3	1	4	3	1	1.38979e-05	1.08037e-05	3.6819e-06		0.777363	0.264925	0.571668	0.139251	0.442151		Uncharacterized protein OS=Escherichia coli (strain B / BL21-DE3) OX=469008 GN=ECBD_3286 PE=4 SV=1
987	A0A140NAC8	trpC	2	1	4	3	1	1.11921e-05	8.70035e-06	2.96507e-06		0.777363	0.264925	0.351139	0.139251	0.442151		Multifunctional fusion protein OS=Escherichia coli (strain B / BL21-DE3) OX=469008 GN=trpF PE=3 SV=1
971	A0A140NCR6	lon	2	4	4	3	6	6.45261e-06	5.01602e-06	1.02567e-05		0.777363	1.58955	0.571668	0.932926	0.442151		Lon protease OS=Escherichia coli (strain B / BL21-DE3) OX=469008 GN=lon PE=2 SV=1
363	A0A140NCB5	nrdR	5	5	28	21	27	0.000237664	0.000184751	0.000242857		0.777363	1.02185	0.843025	0.761598	0.442151		Transcriptional repressor NrdR OS=Escherichia coli (strain B / BL21-DE3) OX=469008 GN=nrdR PE=3 SV=1
992	A0A140N7H3	zntR	2	1	4	3	2	3.58783e-05	2.78905e-05	1.90101e-05		0.777363	0.529849	0.115353	0.398904	0.442151		Transcriptional regulator, MerR family OS=Escherichia coli (strain B / BL21-DE3) OX=469008 GN=ECBD_0459 PE=4 SV=1
993	A0A140NHI4	pldA	2	1	4	3	1	1.75047e-05	1.36075e-05	4.63741e-06		0.777363	0.264925	0.734989	0.139251	0.442151		Phospholipase A1 OS=Escherichia coli (strain B / BL21-DE3) OX=469008 GN=ECBD_4217 PE=3 SV=1
512	A0A140N7Y4	rsuA	8	8	75	56	65	0.000410621	0.000317782	0.000377116		0.773908	0.918405	0.279685	0.705171	0.438982		Pseudouridine synthase OS=Escherichia coli (strain B / BL21-DE3) OX=469008 GN=ECBD_1474 PE=3 SV=1
882	A0A140N2B1	gor	17	14	130	97	80	0.000365361	0.000282562	0.00023826		0.773376	0.652122	0.365942	0.510947	0.438493		Glutathione-disulfide reductase OS=Escherichia coli (strain B / BL21-DE3) OX=469008 GN=ECBD_0241 PE=3 SV=1
632	A0A140NDD7	yijP	28	29	366	273	285	0.000802226	0.000620213	0.000661977		0.773115	0.825175	0.63096	0.645405	0.438253		Sulfatase OS=Escherichia coli (strain B / BL21-DE3) OX=469008 GN=ECBD_4069 PE=4 SV=1
729	A0A140NFY3	carB	57	50	459	342	326	0.000541009	0.000417811	0.000407185		0.772282	0.75264	0.485011	0.592764	0.437488		Carbamoyl-phosphate synthase large chain OS=Escherichia coli (strain B / BL21-DE3) OX=469008 GN=carB PE=3 SV=1
647	A0A140NI98	atpF	18	16	603	449	466	0.0048886	0.0037729	0.00400345		0.771776	0.818938	0.586586	0.641091	0.437023		ATP synthase subunit b OS=Escherichia coli (strain B / BL21-DE3) OX=469008 GN=atpF PE=3 SV=1
613	A0A140NB87	pncB	20	14	78	58	62	0.000246619	0.000190074	0.000207733		0.770719	0.842324	0.56668	0.657058	0.43605		Nicotinate phosphoribosyltransferase OS=Escherichia coli (strain B / BL21-DE3) OX=469008 GN=pncB PE=3 SV=1
685	A0A140N7R5	arnD	10	10	39	29	29	0.000166634	0.000128428	0.000131305		0.770719	0.787981	0.546333	0.619091	0.43605		Probable 4-deoxy-4-formamido-L-arabinose-phosphoundecaprenol deformylase ArnD OS=Escherichia coli (strain B / BL21-DE3) OX=469008 GN=arnD PE=3 SV=1
1384	A0A140N1P7	yidA	9	6	66	49	21	0.000309152	0.000237895	0.000104239		0.769511	0.337177	0.0742054	0.207701	0.434939		Cof-like hydrolase OS=Escherichia coli (strain B / BL21-DE3) OX=469008 GN=ECBD_0006 PE=4 SV=1
615	A0A140NBW4	ribC	8	8	62	46	49	0.000368132	0.000283095	0.000308312		0.769004	0.837503	0.526394	0.653813	0.434473		Riboflavin synthase, alpha subunit OS=Escherichia coli (strain B / BL21-DE3) OX=469008 GN=ECBD_1981 PE=4 SV=1
693	A0A140N7L9	rpsK	10	9	417	309	307	0.00408825	0.00313995	0.0031895		0.768042	0.780161	0.457622	0.613377	0.433587		30S ribosomal protein S11 OS=Escherichia coli (strain B / BL21-DE3) OX=469008 GN=rpsK PE=3 SV=1
408	A0A140N494	cysE	4	4	50	37	46	0.000231632	0.000177661	0.000225823		0.766998	0.974922	0.594482	0.737237	0.432625		Acetyltransferase OS=Escherichia coli (strain B / BL21-DE3) OX=469008 GN=ECBD_0118 PE=3 SV=1
425	A0A140N6V1	slyD	5	5	165	122	150	0.00106468	0.000815939	0.00102567		0.76637	0.963362	0.259548	0.730925	0.432046		Peptidyl-prolyl cis-trans isomerase OS=Escherichia coli (strain B / BL21-DE3) OX=469008 GN=ECBD_0400 PE=3 SV=1
965	C5W8B2	rlmM	7	5	23	17	13	7.94764e-05	6.08866e-05	4.76032e-05		0.766097	0.59896	0.627808	0.463752	0.431794		Ribosomal RNA large subunit methyltransferase M OS=Escherichia coli (strain B / BL21-DE3) OX=469008 GN=rlmM PE=3 SV=1
1008	A0A140N877	hybO	3	1	23	17	1	7.81945e-05	5.99046e-05	3.60272e-06		0.766097	0.0460738	0.20333	0.00433349	0.431794		Hydrogenase (NiFe) small subunit HydA OS=Escherichia coli (strain B / BL21-DE3) OX=469008 GN=ECBD_0741 PE=4 SV=1
895	A0A140NAB6	arnT	8	3	23	17	14	5.28879e-05	4.05173e-05	3.41145e-05		0.766097	0.645034	0.596424	0.504804	0.431794		Undecaprenyl phosphate-alpha-4-amino-4-deoxy-L-arabinose arabinosyl transferase OS=Escherichia coli (strain B / BL21-DE3) OX=469008 GN=arnT PE=3 SV=1
536	A0A140N4R6	yibL	7	3	42	31	36	0.000442649	0.000338637	0.000402064		0.765024	0.908313	0.396595	0.69912	0.430805		Uncharacterized protein OS=Escherichia coli (strain B / BL21-DE3) OX=469008 GN=ECBD_0125 PE=4 SV=1
950	A0A140ND69	proA	14	15	122	90	70	0.000370011	0.000282918	0.000224976		0.764619	0.608024	0.587346	0.471976	0.430431		Gamma-glutamyl phosphate reductase OS=Escherichia coli (strain B / BL21-DE3) OX=469008 GN=proA PE=3 SV=1
1328	A0A140NE48	iadA	11	8	61	45	22	0.000197814	0.000151252	7.56017e-05		0.764619	0.382186	0.421028	0.252357	0.430431		Isoaspartyl dipeptidase OS=Escherichia coli (strain B / BL21-DE3) OX=469008 GN=ECBD_3703 PE=3 SV=1
761	A0A140NEX6	ampH	8	6	19	14	13	6.24143e-05	4.76674e-05	4.52539e-05		0.763725	0.725057	0.473344	0.571324	0.429606		Beta-lactamase OS=Escherichia coli (strain B / BL21-DE3) OX=469008 GN=ECBD_3289 PE=4 SV=1
855	A0A140N7R0	dacB	8	6	19	14	12	5.03763e-05	3.84737e-05	3.3716e-05		0.763725	0.669283	0.673578	0.525624	0.429606		D-alanyl-D-alanine carboxypeptidase/D-alanyl-D-alanine-endopeptidase OS=Escherichia coli (strain B / BL21-DE3) OX=469008 GN=ECBD_0560 PE=4 SV=1
663	A0A140NBE7	pflB	54	45	726	534	552	0.00120813	0.000921046	0.000973417		0.762372	0.805721	0.592135	0.631819	0.428357		Formate acetyltransferase OS=Escherichia coli (strain B / BL21-DE3) OX=469008 GN=ECBD_2692 PE=4 SV=1
1543	A0A140N3Z1	yhjJ	12	6	34	25	8	8.63458e-05	6.58059e-05	2.15295e-05		0.76212	0.249341	0.127752	0.125357	0.428125		Peptidase M16 domain protein OS=Escherichia coli (strain B / BL21-DE3) OX=469008 GN=ECBD_0212 PE=4 SV=1
190	A0A140NB33	secF	7	10	64	47	78	0.000250593	0.000190743	0.000323643		0.761168	1.29151	0.781301	0.867062	0.427244		Protein-export membrane protein SecF OS=Escherichia coli (strain B / BL21-DE3) OX=469008 GN=secF PE=3 SV=1
682	A0A140N7Q6	fis	3	3	90	66	67	0.00116147	0.000882819	0.000916268		0.760088	0.788886	0.617208	0.619748	0.426247		DNA-binding protein Fis OS=Escherichia coli (strain B / BL21-DE3) OX=469008 GN=fis PE=3 SV=1
147	A0A140NA26	ais	9	9	120	88	166	0.000758827	0.000576775	0.00111238		0.760088	1.46592	0.795113	0.910551	0.426247		Lipopolysaccharide core heptose(II)-phosphate phosphatase OS=Escherichia coli (strain B / BL21-DE3) OX=469008 GN=ais PE=3 SV=1
1049	A0A140N7A3	lptB	10	5	45	33	23	0.000236149	0.000179494	0.000127904		0.760088	0.541623	0.592822	0.410198	0.426247		ABC transporter related OS=Escherichia coli (strain B / BL21-DE3) OX=469008 GN=ECBD_0541 PE=4 SV=1
917	A0A140ND79	tesB	7	3	15	11	9	6.6331e-05	5.04174e-05	4.21745e-05		0.760088	0.635819	0.697303	0.496747	0.426247		Acyl-CoA thioesterase II OS=Escherichia coli (strain B / BL21-DE3) OX=469008 GN=ECBD_3203 PE=4 SV=1
696	A0A140NG07	rdoA	7	4	15	11	11	5.78374e-05	4.39615e-05	4.49461e-05		0.760088	0.777112	0.503795	0.611131	0.426247		Stress response kinase A OS=Escherichia coli (strain B / BL21-DE3) OX=469008 GN=srkA PE=3 SV=1
596	A0A140N8N2	ftnA	11	11	146	107	119	0.00111908	0.000850068	0.000966577		0.759615	0.863727	0.530593	0.671181	0.425809		Ferritin OS=Escherichia coli (strain B / BL21-DE3) OX=469008 GN=ECBD_1735 PE=3 SV=1
1002	A0A140NDB1	pepD	21	21	362	265	198	0.00094397	0.000716239	0.000547138		0.758752	0.579614	0.461985	0.445968	0.425011		Aminoacyl-histidine dipeptidase OS=Escherichia coli (strain B / BL21-DE3) OX=469008 GN=ECBD_3384 PE=4 SV=1
668	A0A140NA12	lolB	9	7	41	30	31	0.000250498	0.000189979	0.000200708		0.758403	0.801235	0.475607	0.628631	0.424688		Outer-membrane lipoprotein LolB OS=Escherichia coli (strain B / BL21-DE3) OX=469008 GN=lolB PE=3 SV=1
1542	A0A140NA60	nadA	8	4	93	68	22	0.000338957	0.000256882	8.49702e-05		0.757859	0.250681	0.104362	0.126536	0.424185		Quinolinate synthase A OS=Escherichia coli (strain B / BL21-DE3) OX=469008 GN=nadA PE=3 SV=1
1028	A0A140NAK1	cysB	12	4	52	38	4	0.000202978	0.000153742	1.65458e-05		0.75743	0.0815152	0.47602	0.0144131	0.423788		Transcriptional regulator, LysR family OS=Escherichia coli (strain B / BL21-DE3) OX=469008 GN=ECBD_2347 PE=3 SV=1
1075	A0A140N7I1	rimN	6	4	26	19	13	0.000173066	0.000131085	9.16987e-05		0.75743	0.529849	0.0997359	0.398904	0.423788		Threonylcarbamoyl-AMP synthase OS=Escherichia coli (strain B / BL21-DE3) OX=469008 GN=tsaC PE=3 SV=1
1210	A0A140N6J7	lgt	4	3	26	19	11	0.000112998	8.55883e-05	5.06609e-05		0.75743	0.448334	0.525366	0.318687	0.423788		Phosphatidylglycerol--prolipoprotein diacylglyceryl transferase OS=Escherichia coli (strain B / BL21-DE3) OX=469008 GN=lgt PE=3 SV=1
664	A0A140N3D6	crp	11	12	166	121	126	0.000999724	0.000755301	0.000804127		0.755509	0.804349	0.408441	0.630847	0.422009		Transcriptional regulator, Crp/Fnr family OS=Escherichia coli (strain B / BL21-DE3) OX=469008 GN=ECBD_0391 PE=4 SV=1
1237	A0A140N5Z7	rpmG	9	8	638	465	263	0.0146707	0.0110827	0.00640865		0.755431	0.436835	0.407805	0.307177	0.421936		50S ribosomal protein L33 OS=Escherichia coli (strain B / BL21-DE3) OX=469008 GN=rpmG PE=3 SV=1
660	A0A140N537	rpsH	14	11	435	317	331	0.00423192	0.00319646	0.00341239		0.755323	0.806345	0.574778	0.632261	0.421836		30S ribosomal protein S8 OS=Escherichia coli (strain B / BL21-DE3) OX=469008 GN=rpsH PE=3 SV=1
703	A0A140NBN1	ydfG	10	10	70	51	51	0.000356975	0.00026957	0.000275608		0.755152	0.772066	0.53172	0.607395	0.421678		Short-chain dehydrogenase/reductase SDR OS=Escherichia coli (strain B / BL21-DE3) OX=469008 GN=ECBD_2100 PE=3 SV=1
743	A0A140N7V2	hisG	9	6	33	24	23	0.000139584	0.000105219	0.000103093		0.753806	0.738577	0.643249	0.581931	0.420431		ATP phosphoribosyltransferase OS=Escherichia coli (strain B / BL21-DE3) OX=469008 GN=hisG PE=3 SV=1
1037	A0A140NDG9	ycbL	2	1	11	8	5	6.47062e-05	4.87759e-05	3.11677e-05		0.753806	0.481681	0.134666	0.351859	0.420431		Beta-lactamase domain protein OS=Escherichia coli (strain B / BL21-DE3) OX=469008 GN=ECBD_2668 PE=4 SV=1
1076	A0A140NDT9	mukF	10	6	22	16	11	6.32356e-05	4.76674e-05	3.35053e-05		0.753806	0.529849	0.175512	0.398904	0.420431		Chromosome partition protein MukF OS=Escherichia coli (strain B / BL21-DE3) OX=469008 GN=mukF PE=3 SV=1
1038	A0A140NAT9	flgE	5	3	11	8	4	3.46928e-05	2.61517e-05	1.33687e-05		0.753806	0.385345	0.394554	0.255518	0.420431		Flagellar hook protein FlgE OS=Escherichia coli (strain B / BL21-DE3) OX=469008 GN=ECBD_2524 PE=3 SV=1
591	A0A140N2R3	gspD	1	1	11	8	9	4.11592e-05	3.10261e-05	3.56861e-05		0.753806	0.867026	0.477558	0.673317	0.420431		Type II and III secretion system protein OS=Escherichia coli (strain B / BL21-DE3) OX=469008 GN=ECBD_0426 PE=3 SV=1
848	A0A140NEQ7	lnt	7	3	11	8	7	2.71715e-05	2.04821e-05	1.83232e-05		0.753806	0.674353	0.477558	0.529906	0.420431		Apolipoprotein N-acyltransferase OS=Escherichia coli (strain B / BL21-DE3) OX=469008 GN=lnt PE=3 SV=1
1549	A0A140N640	gpmM	15	10	117	85	26	0.000287882	0.000216775	6.77928e-05		0.753001	0.235488	0.165865	0.113356	0.419684		2,3-bisphosphoglycerate-independent phosphoglycerate mutase OS=Escherichia coli (strain B / BL21-DE3) OX=469008 GN=gpmI PE=3 SV=1
1354	A0A140N5Z1	nlpD	9	8	72	52	25	0.000240262	0.000179853	8.84045e-05		0.748571	0.367951	0.390976	0.238143	0.415572		Peptidase M23 OS=Escherichia coli (strain B / BL21-DE3) OX=469008 GN=ECBD_0982 PE=4 SV=1
715	A0A140N4M1	trmH	6	5	18	13	13	9.94096e-05	7.44152e-05	7.60819e-05		0.748571	0.765338	0.404055	0.602372	0.415572		tRNA (guanosine(18)-2'-O)-methyltransferase OS=Escherichia coli (strain B / BL21-DE3) OX=469008 GN=trmH PE=3 SV=1
857	A0A140N4Z5	bcsB	16	11	54	39	34	8.9041e-05	6.66535e-05	5.94097e-05		0.748571	0.667217	0.519433	0.523872	0.415572		Cyclic di-GMP-binding protein OS=Escherichia coli (strain B / BL21-DE3) OX=469008 GN=ECBD_0207 PE=3 SV=1
794	A0A140N7B0	argD	10	12	93	67	62	0.0002897	0.000216323	0.000204663		0.746714	0.706465	0.565386	0.556436	0.413846		Acetylornithine/succinyldiaminopimelate aminotransferase OS=Escherichia coli (strain B / BL21-DE3) OX=469008 GN=argD PE=3 SV=1
1045	A0A140NDU2	fkpB	4	2	25	18	5	0.0002122	0.000158358	4.49736e-05		0.746268	0.21194	0.0496397	0.0938202	0.413431		Peptidyl-prolyl cis-trans isomerase OS=Escherichia coli (strain B / BL21-DE3) OX=469008 GN=ECBD_3588 PE=3 SV=1
918	A0A140N7T6	trpB	8	5	25	18	15	7.96418e-05	5.94341e-05	5.06377e-05		0.746268	0.635819	0.445075	0.496747	0.413431		Tryptophan synthase beta chain OS=Escherichia coli (strain B / BL21-DE3) OX=469008 GN=trpB PE=3 SV=1
378	A0A140N6J0	rpoZ	10	11	339	244	323	0.0047114	0.00351481	0.00475702		0.746024	1.00968	0.678562	0.755473	0.413204		DNA-directed RNA polymerase subunit omega OS=Escherichia coli (strain B / BL21-DE3) OX=469008 GN=rpoZ PE=3 SV=1
777	A0A140NCP4	mfd	39	30	132	95	89	0.000143421	0.000106985	0.000102473		0.745954	0.714493	0.443699	0.562908	0.413139		Transcription-repair-coupling factor OS=Escherichia coli (strain B / BL21-DE3) OX=469008 GN=mfd PE=3 SV=1
929	A0A140N8V8	wbbC	11	8	32	23	19	0.00010938	8.14854e-05	6.88217e-05		0.744973	0.629196	0.351139	0.490907	0.412226		Glycosyl transferase group 1 OS=Escherichia coli (strain B / BL21-DE3) OX=469008 GN=ECBD_1624 PE=4 SV=1
1290	A0A140NAV2	yebR	8	5	39	28	15	0.000269529	0.000200568	0.000109853		0.744142	0.407576	0.0318725	0.277815	0.411453		Putative GAF sensor protein OS=Escherichia coli (strain B / BL21-DE3) OX=469008 GN=ECBD_1808 PE=4 SV=1
927	A0A140N775	mdh	18	13	387	277	230	0.00156873	0.0011638	0.000987977		0.741876	0.629795	0.519073	0.491437	0.409343		Malate dehydrogenase OS=Escherichia coli (strain B / BL21-DE3) OX=469008 GN=mdh PE=3 SV=1
745	A0A140NCN5	dnaX	15	11	49	35	34	9.63777e-05	7.13528e-05	7.08666e-05		0.740345	0.735301	0.399797	0.579378	0.407917		DNA polymerase III subunit gamma/tau OS=Escherichia coli (strain B / BL21-DE3) OX=469008 GN=dnaX PE=3 SV=1
1059	A0A140NEF8	rna	4	2	14	10	3	6.6067e-05	4.89124e-05	1.50024e-05		0.740345	0.227078	0.0093824	0.106246	0.407917		Enterobacter ribonuclease OS=Escherichia coli (strain B / BL21-DE3) OX=469008 GN=ECBD_3041 PE=3 SV=1
1051	A0A140N935	ygaU	2	3	7	5	7	5.9416e-05	4.39883e-05	6.2963e-05		0.740345	1.0597	0.0396405	0.779818	0.407917		Peptidoglycan-binding LysM OS=Escherichia coli (strain B / BL21-DE3) OX=469008 GN=ECBD_1054 PE=4 SV=1
346	A0A140NAD0	yaiI	2	3	7	5	7	5.82433e-05	4.31202e-05	6.17203e-05		0.740345	1.0597	0.543376	0.779818	0.407917		UPF0178 protein YaiI OS=Escherichia coli (strain B / BL21-DE3) OX=469008 GN=yaiI PE=3 SV=1
1056	A0A140N781	gutQ	6	3	14	10	4	5.51587e-05	4.08365e-05	1.67005e-05		0.740345	0.302771	0.649085	0.174422	0.407917		Arabinose 5-phosphate isomerase OS=Escherichia coli (strain B / BL21-DE3) OX=469008 GN=ECBD_1017 PE=3 SV=1
1055	A0A140N9X6	yfeY	3	2	7	5	3	4.63507e-05	3.43155e-05	2.10505e-05		0.740345	0.454156	0.80266	0.324504	0.407917		Uncharacterized protein OS=Escherichia coli (strain B / BL21-DE3) OX=469008 GN=ECBD_1250 PE=4 SV=1
1057	A0A140NEG8	yjjG	3	1	7	5	2	3.93466e-05	2.91301e-05	1.1913e-05		0.740345	0.302771	0.146064	0.174422	0.407917		HAD-superfamily hydrolase, subfamily IA, variant 1 OS=Escherichia coli (strain B / BL21-DE3) OX=469008 GN=ECBD_3647 PE=4 SV=1
722	A0A140N473	exbB	3	2	7	5	5	3.62827e-05	2.68617e-05	2.74634e-05		0.740345	0.756927	0.734989	0.596027	0.407917		TonB-system energizer ExbB OS=Escherichia coli (strain B / BL21-DE3) OX=469008 GN=ECBD_0733 PE=3 SV=1
1058	A0A140N822	cdd	4	1	7	5	2	3.01122e-05	2.22934e-05	9.11709e-06		0.740345	0.302771	0.0396405	0.174422	0.407917		Cytidine deaminase OS=Escherichia coli (strain B / BL21-DE3) OX=469008 GN=cdd PE=3 SV=1
1060	A0A140NC90	ybhK	3	1	7	5	1	2.93145e-05	2.17029e-05	4.43779e-06		0.740345	0.151385	0.649085	0.0498937	0.407917		Putative gluconeogenesis factor OS=Escherichia coli (strain B / BL21-DE3) OX=469008 GN=ECBD_2843 PE=3 SV=1
1061	A0A140N8B1	cpsG	2	1	7	5	1	1.94144e-05	1.43734e-05	2.93906e-06		0.740345	0.151385	0.146064	0.0498937	0.407917		Phosphomannomutase OS=Escherichia coli (strain B / BL21-DE3) OX=469008 GN=ECBD_1607 PE=3 SV=1
1011	A0A140NAS5	lrp	12	9	94	67	51	0.000724896	0.000535531	0.000416773		0.73877	0.574943	0.34085	0.441629	0.406449		Transcriptional regulator, AsnC family OS=Escherichia coli (strain B / BL21-DE3) OX=469008 GN=ECBD_2706 PE=4 SV=1
907	A0A140N394	ompR	15	11	94	67	57	0.000497418	0.000367477	0.000319632		0.73877	0.642583	0.542145	0.502668	0.406449		Two component transcriptional regulator, winged helix family OS=Escherichia coli (strain B / BL21-DE3) OX=469008 GN=ECBD_0340 PE=4 SV=1
597	A0A140N801	gshB	12	11	80	57	65	0.00032018	0.000236451	0.000275677		0.738495	0.861005	0.51087	0.669411	0.406192		Glutathione synthetase OS=Escherichia coli (strain B / BL21-DE3) OX=469008 GN=gshB PE=3 SV=1
592	A0A140NB23	pth	11	11	66	47	54	0.000430263	0.000317578	0.000373049		0.738102	0.867026	0.663355	0.673317	0.405826		Peptidyl-tRNA hydrolase OS=Escherichia coli (strain B / BL21-DE3) OX=469008 GN=pth PE=3 SV=1
1309	A0A140N556	def	5	4	38	27	14	0.000284373	0.000209426	0.000111023		0.736449	0.390415	0.325621	0.260597	0.404283		Peptide deformylase OS=Escherichia coli (strain B / BL21-DE3) OX=469008 GN=def PE=1 SV=1
1212	A0A140N7W7	gsp	12	6	38	27	16	7.76398e-05	5.71777e-05	3.4642e-05		0.736449	0.446189	0.325621	0.316542	0.404283		Glutathionylspermidine amidase OS=Escherichia coli (strain B / BL21-DE3) OX=469008 GN=ECBD_0750 PE=4 SV=1
812	A0A140NAX1	sdaA	16	13	124	88	81	0.000345428	0.000254086	0.000239113		0.735569	0.692222	0.526394	0.544795	0.403462		L-serine dehydratase OS=Escherichia coli (strain B / BL21-DE3) OX=469008 GN=ECBD_1828 PE=3 SV=1
1155	A0A140NEW5	tyrB	13	8	93	66	42	0.000296267	0.000217925	0.000141786		0.735569	0.478573	0.437243	0.348784	0.403462		Aminotransferase OS=Escherichia coli (strain B / BL21-DE3) OX=469008 GN=ECBD_3979 PE=3 SV=1
911	A0A140NDZ5	rsmC	16	9	48	34	29	0.000176986	0.000129939	0.000113312		0.734176	0.640234	0.555312	0.500617	0.402161		Ribosomal RNA small subunit methyltransferase C OS=Escherichia coli (strain B / BL21-DE3) OX=469008 GN=rsmC PE=3 SV=1
1566	A0A140NEY7	ispA	7	4	24	17	5	0.000101515	7.45301e-05	2.24116e-05		0.734176	0.22077	0.310653	0.101009	0.402161		Polyprenyl synthetase OS=Escherichia coli (strain B / BL21-DE3) OX=469008 GN=ECBD_3240 PE=3 SV=1
736	A0A140SS46	miaA	7	4	17	12	12	6.80383e-05	4.97792e-05	5.08941e-05		0.731635	0.748022	0.43435	0.58923	0.399788		tRNA dimethylallyltransferase OS=Escherichia coli (strain B / BL21-DE3) OX=469008 GN=miaA PE=3 SV=1
561	A0A140N2Z9	rpsI	13	13	418	295	350	0.00406653	0.00297463	0.00360826		0.73149	0.887307	0.589032	0.686205	0.399651		30S ribosomal protein S9 OS=Escherichia coli (strain B / BL21-DE3) OX=469008 GN=rpsI PE=3 SV=1
1198	A0A140NE14	lysU	28	21	237	167	102	0.000593538	0.00043349	0.000270696		0.730349	0.456073	0.500189	0.326416	0.398585		Lysine--tRNA ligase OS=Escherichia coli (strain B / BL21-DE3) OX=469008 GN=lysS PE=3 SV=1
1036	A0A140N2F9	yhhX	9	7	44	31	23	0.000161297	0.000117787	8.93475e-05		0.73025	0.553933	0.638081	0.421904	0.398492		Oxidoreductase domain protein OS=Escherichia coli (strain B / BL21-DE3) OX=469008 GN=ECBD_0302 PE=4 SV=1
961	A0A140NFC6	yajQ	11	12	263	185	149	0.00204061	0.00148778	0.0012251		0.729085	0.600361	0.304926	0.465028	0.397403		UPF0234 protein YajQ OS=Escherichia coli (strain B / BL21-DE3) OX=469008 GN=yajQ PE=3 SV=1
372	A0A140NE46	dacC	13	10	47	33	45	0.000148604	0.000108145	0.000150774		0.727744	1.0146	0.583912	0.757966	0.396148		Beta-lactamase OS=Escherichia coli (strain B / BL21-DE3) OX=469008 GN=ECBD_2784 PE=3 SV=1
1262	A0A140NDZ7	dksA	6	4	130	91	51	0.00108882	0.000789984	0.000452654		0.725539	0.415728	0.231234	0.286	0.394083		RNA polymerase-binding transcription factor DksA OS=Escherichia coli (strain B / BL21-DE3) OX=469008 GN=dksA PE=3 SV=1
919	A0A140NG83	rffD	7	6	30	21	18	9.03365e-05	6.55426e-05	5.74377e-05		0.725539	0.635819	0.414434	0.496747	0.394083		UDP-N-acetyl-D-mannosamine dehydrogenase OS=Escherichia coli (strain B / BL21-DE3) OX=469008 GN=wecC PE=3 SV=1
448	A0A140N7W8	nuoJ	1	2	10	7	9	6.87343e-05	4.98694e-05	6.55539e-05		0.725539	0.953728	0.676897	0.725569	0.394083		NADH-quinone oxidoreductase subunit J OS=Escherichia coli (strain B / BL21-DE3) OX=469008 GN=ECBD_1381 PE=1 SV=1
1082	A0A140N7G1	diaA	2	1	10	7	4	6.45261e-05	4.68162e-05	2.73513e-05		0.725539	0.423879	0.0191128	0.294183	0.394083		DnaA initiator-associating protein DiaA OS=Escherichia coli (strain B / BL21-DE3) OX=469008 GN=diaA PE=3 SV=1
1084	A0A140N8F6	argP	4	2	10	7	2	4.25829e-05	3.08955e-05	9.025e-06		0.725539	0.21194	0.445075	0.0938202	0.394083		HTH-type transcriptional regulator ArgP OS=Escherichia coli (strain B / BL21-DE3) OX=469008 GN=argP PE=3 SV=1
920	A0A140N580	menD	4	3	10	7	6	2.27466e-05	1.65035e-05	1.44627e-05		0.725539	0.635819	0.676897	0.496747	0.394083		2-succinyl-5-enolpyruvyl-6-hydroxy-3-cyclohexene-1-carboxylate synthase OS=Escherichia coli (strain B / BL21-DE3) OX=469008 GN=menD PE=3 SV=1
263	C5W865	cysI	6	6	10	7	11	2.21879e-05	1.60982e-05	2.58637e-05		0.725539	1.16567	0.445075	0.824557	0.394083		Sulfite reductase [NADPH] hemoprotein beta-component OS=Escherichia coli (strain B / BL21-DE3) OX=469008 GN=cysI PE=3 SV=1
1010	A0A140NC67	pgm	26	20	223	156	121	0.00051654	0.000374529	0.000297007		0.725074	0.574993	0.425377	0.441676	0.393648		Phosphoglucomutase, alpha-D-glucose phosphate-specific OS=Escherichia coli (strain B / BL21-DE3) OX=469008 GN=ECBD_2973 PE=3 SV=1
952	A0A140N5I0	fkpA	23	17	252	176	144	0.0011804	0.000854482	0.00071478		0.723893	0.605542	0.479774	0.469731	0.392542		Peptidyl-prolyl cis-trans isomerase OS=Escherichia coli (strain B / BL21-DE3) OX=469008 GN=ECBD_0402 PE=3 SV=1
910	A0A140NEC6	pyrI	8	9	43	30	26	0.000355442	0.00025703	0.000227748		0.723128	0.640748	0.49047	0.501066	0.391825		Aspartate carbamoyltransferase regulatory chain OS=Escherichia coli (strain B / BL21-DE3) OX=469008 GN=pyrI PE=3 SV=1
1486	A0A140N3A3	nudE	5	2	33	23	9	0.000224384	0.000162095	6.4849e-05		0.722398	0.289009	0.161616	0.161427	0.391141		NUDIX hydrolase OS=Escherichia coli (strain B / BL21-DE3) OX=469008 GN=ECBD_0350 PE=4 SV=1
884	A0A140NCD7	pgi	28	24	329	229	202	0.000757905	0.000546785	0.00049312		0.721443	0.650635	0.553144	0.509663	0.390246		Glucose-6-phosphate isomerase OS=Escherichia coli (strain B / BL21-DE3) OX=469008 GN=pgi PE=3 SV=1
1411	A0A140N8Z2	amiC	8	5	23	16	7	6.97563e-05	5.02965e-05	2.24976e-05		0.721032	0.322517	0.20333	0.193401	0.389861		N-acetylmuramoyl-L-alanine amidase OS=Escherichia coli (strain B / BL21-DE3) OX=469008 GN=ECBD_0908 PE=4 SV=1
358	A0A140NEJ4	metJ	5	6	36	25	35	0.000433615	0.000312108	0.000446737		0.71978	1.03026	0.549768	0.765755	0.388687		Met repressor OS=Escherichia coli (strain B / BL21-DE3) OX=469008 GN=metJ PE=3 SV=1
1017	A0A140N8C3	yqgE	6	4	39	27	21	0.000233762	0.000167739	0.000133386		0.717566	0.570607	0.189637	0.437585	0.386609		UPF0301 protein YqgE OS=Escherichia coli (strain B / BL21-DE3) OX=469008 GN=yqgE PE=3 SV=1
1095	A0A140NDV6	yigA	5	2	13	9	2	6.99628e-05	5.02029e-05	1.14061e-05		0.717566	0.16303	0.0459415	0.0575232	0.386609		Uncharacterized protein OS=Escherichia coli (strain B / BL21-DE3) OX=469008 GN=ECBD_4231 PE=4 SV=1
1089	A0A140N8E8	relA	15	8	39	27	19	6.62954e-05	4.75713e-05	3.42259e-05		0.717566	0.516263	0.43573	0.385764	0.386609		(P)ppGpp synthetase I, SpoT/RelA OS=Escherichia coli (strain B / BL21-DE3) OX=469008 GN=ECBD_0945 PE=3 SV=1
1094	A0A140N7T9	metC	5	3	13	9	3	4.16234e-05	2.98675e-05	1.01788e-05		0.717566	0.244546	0.641665	0.121163	0.386609		Cystathionine beta-lyase OS=Escherichia coli (strain B / BL21-DE3) OX=469008 GN=ECBD_0732 PE=3 SV=1
1339	A0A140N7F8	yeiP	7	3	65	45	23	0.000432664	0.000310465	0.000162236		0.717566	0.37497	0.0655715	0.245144	0.386609		Elongation factor P-like protein OS=Escherichia coli (strain B / BL21-DE3) OX=469008 GN=yeiP PE=3 SV=1
393	A0A140N690	glyQ	8	8	91	63	85	0.000379831	0.000272554	0.000375967		0.717566	0.989828	0.649085	0.745192	0.386609		Glycine--tRNA ligase alpha subunit OS=Escherichia coli (strain B / BL21-DE3) OX=469008 GN=glyQ PE=3 SV=1
1291	A0A140N9T6	ubiG	7	4	39	27	15	0.000205516	0.000147471	8.37633e-05		0.717566	0.407576	0.43573	0.277815	0.386609		Ubiquinone biosynthesis O-methyltransferase OS=Escherichia coli (strain B / BL21-DE3) OX=469008 GN=ubiG PE=3 SV=1
1292	A0A140N2D6	sirA	3	1	13	9	5	0.000202978	0.00014565	8.27292e-05		0.717566	0.407576	0.387943	0.277815	0.386609		Sulfur carrier protein TusA OS=Escherichia coli (strain B / BL21-DE3) OX=469008 GN=tusA PE=3 SV=1
405	A0A140SS74	rluF	6	5	13	9	12	5.6694e-05	4.06816e-05	5.54571e-05		0.717566	0.978183	0.641665	0.738994	0.386609		Pseudouridine synthase OS=Escherichia coli (strain B / BL21-DE3) OX=469008 GN=ECBD_4015 PE=3 SV=1
753	A0A140N8P0	recC	8	6	13	9	9	1.46535e-05	1.05149e-05	1.07504e-05		0.717566	0.733637	0.313782	0.578077	0.386609		RecBCD enzyme subunit RecC OS=Escherichia coli (strain B / BL21-DE3) OX=469008 GN=recC PE=3 SV=1
1110	A0A140N487	kbl	21	17	353	244	167	0.00112172	0.000803638	0.00056235		0.716436	0.50133	0.422231	0.371198	0.385549		2-amino-3-ketobutyrate coenzyme A ligase OS=Escherichia coli (strain B / BL21-DE3) OX=469008 GN=kbl PE=3 SV=1
1301	A0A140NFF3	lpcA	11	9	136	94	51	0.000895837	0.000641772	0.000355994		0.716393	0.397387	0.301072	0.267588	0.385508		Phosphoheptose isomerase OS=Escherichia coli (strain B / BL21-DE3) OX=469008 GN=gmhA PE=3 SV=1
1464	A0A140N460	ftsP	8	6	42	29	12	0.000113017	8.08824e-05	3.42182e-05		0.715667	0.302771	0.167541	0.174422	0.384827		Cell division protein FtsP OS=Escherichia coli (strain B / BL21-DE3) OX=469008 GN=ftsP PE=3 SV=1
1041	A0A140NDT0	pepN	35	27	232	160	121	0.000337256	0.000241076	0.000186397		0.714816	0.552687	0.448199	0.420724	0.384028		Aminopeptidase N OS=Escherichia coli (strain B / BL21-DE3) OX=469008 GN=ECBD_2663 PE=4 SV=1
1459	A0A140NFF1	hemN	13	6	58	40	17	0.00016051	0.000114735	4.98547e-05		0.714816	0.310601	0.367722	0.181905	0.384028		Coproporphyrinogen-III oxidase OS=Escherichia coli (strain B / BL21-DE3) OX=469008 GN=ECBD_4161 PE=3 SV=1
1616	A0A140NGH9	deoC	8	3	29	20	5	0.000141609	0.000101224	2.58728e-05		0.714816	0.182707	0.108263	0.0713498	0.384028		Deoxyribose-phosphate aldolase OS=Escherichia coli (strain B / BL21-DE3) OX=469008 GN=deoC PE=3 SV=1
1007	A0A140N6R9	aroK	11	10	147	101	80	0.000826278	0.000588427	0.00047652		0.712142	0.576706	0.450002	0.443269	0.381516		Shikimate kinase 1 OS=Escherichia coli (strain B / BL21-DE3) OX=469008 GN=aroK PE=3 SV=1
679	A0A140NED8	pmbA	20	17	83	57	62	0.000233269	0.000166041	0.000184651		0.711802	0.791582	0.447259	0.621701	0.381197		Peptidase U62 modulator of DNA gyrase OS=Escherichia coli (strain B / BL21-DE3) OX=469008 GN=ECBD_3799 PE=4 SV=1
1202	A0A140NE03	mdoB	11	8	35	24	15	5.80143e-05	4.12326e-05	2.63476e-05		0.710732	0.454156	0.364888	0.324504	0.380191		Phosphoglycerol transferase I OS=Escherichia coli (strain B / BL21-DE3) OX=469008 GN=mdoB PE=3 SV=1
381	A0A140NBR3	can	9	10	184	126	175	0.00105776	0.000750761	0.00106608		0.709766	1.00787	0.681649	0.754546	0.379283		Carbonic anhydrase OS=Escherichia coli (strain B / BL21-DE3) OX=469008 GN=ECBD_3493 PE=1 SV=1
347	A0A140NE42	lptE	4	6	19	13	19	0.000124505	8.82958e-05	0.000131938		0.709173	1.0597	0.761914	0.779818	0.378725		LPS-assembly lipoprotein LptE OS=Escherichia coli (strain B / BL21-DE3) OX=469008 GN=lptE PE=3 SV=1
1386	A0A140NEQ9	basR	7	4	41	28	13	0.000233573	0.000165333	7.84809e-05		0.707842	0.336002	0.315612	0.206549	0.377474		Two component transcriptional regulator, winged helix family OS=Escherichia coli (strain B / BL21-DE3) OX=469008 GN=ECBD_3918 PE=4 SV=1
1104	A0A140N604	yraM	21	18	82	56	39	0.000152959	0.000108271	7.70919e-05		0.707842	0.504003	0.397689	0.373814	0.377474		Penicillin-binding protein activator LpoA OS=Escherichia coli (strain B / BL21-DE3) OX=469008 GN=lpoA PE=3 SV=1
772	A0A140NDF0	ddlA	15	15	145	99	98	0.0005038	0.000356523	0.000360826		0.707668	0.71621	0.523162	0.564283	0.37731		D-alanine--D-alanine ligase OS=Escherichia coli (strain B / BL21-DE3) OX=469008 GN=ddl PE=3 SV=1
1116	A0A140NCF6	ybgF	13	11	126	86	59	0.000605907	0.000428644	0.000300656		0.707441	0.496208	0.31259	0.366174	0.377097		Cell division coordinator CpoB OS=Escherichia coli (strain B / BL21-DE3) OX=469008 GN=cpoB PE=3 SV=1
205	A0A140N9R4	infC	12	11	261	178	311	0.00183383	0.00129629	0.00231559		0.706874	1.26271	0.68192	0.858251	0.376563		Translation initiation factor IF-3 OS=Escherichia coli (strain B / BL21-DE3) OX=469008 GN=infC PE=3 SV=1
849	A0A140NGV4	uvrA	18	16	66	45	42	8.87989e-05	6.27536e-05	5.98818e-05		0.706693	0.674353	0.62224	0.529906	0.376394		UvrABC system protein A OS=Escherichia coli (strain B / BL21-DE3) OX=469008 GN=uvrA PE=3 SV=1
1005	A0A140NDY4	gpp	7	6	22	15	12	5.63232e-05	3.98032e-05	3.25558e-05		0.706693	0.578017	0.653414	0.444487	0.376394		Guanosine-5'-triphosphate,3'-diphosphate pyrophosphatase OS=Escherichia coli (strain B / BL21-DE3) OX=469008 GN=gppA PE=3 SV=1
1129	A0A140NEN8	seqA	8	6	91	62	42	0.000635849	0.000449021	0.000310988		0.706176	0.489091	0.578023	0.359174	0.375907		Negative modulator of initiation of replication OS=Escherichia coli (strain B / BL21-DE3) OX=469008 GN=seqA PE=3 SV=1
1624	A0A140NEY3	hemC	13	7	72	49	11	0.00028456	0.000200724	4.60698e-05		0.705385	0.161898	0.0628239	0.0567627	0.375162		Porphobilinogen deaminase OS=Escherichia coli (strain B / BL21-DE3) OX=469008 GN=hemC PE=3 SV=1
1182	A0A140N958	ypfJ	4	3	25	17	11	0.000110166	7.76463e-05	5.1367e-05		0.704809	0.466267	0.29273	0.336572	0.374621		Uncharacterized protein OS=Escherichia coli (strain B / BL21-DE3) OX=469008 GN=ECBD_1214 PE=4 SV=1
1331	A0A140N5D3	yghU	5	3	25	17	9	0.000109784	7.73767e-05	4.18816e-05		0.704809	0.381491	0.29273	0.251662	0.374621		Glutathione S-transferase domain protein OS=Escherichia coli (strain B / BL21-DE3) OX=469008 GN=ECBD_0749 PE=4 SV=1
1380	A0A140N6C8	mltA	7	4	25	17	8	8.66241e-05	6.10534e-05	2.93745e-05		0.704809	0.339103	0.408216	0.209592	0.374621		Membrane-bound lytic murein transglycosylase A OS=Escherichia coli (strain B / BL21-DE3) OX=469008 GN=ECBD_0909 PE=4 SV=1
646	A0A140NF30	purE	7	6	53	36	41	0.000396625	0.000279235	0.00032514		0.704027	0.819766	0.630673	0.641667	0.373885		N5-carboxyaminoimidazole ribonucleotide mutase OS=Escherichia coli (strain B / BL21-DE3) OX=469008 GN=purE PE=3 SV=1
537	A0A140N7Y1	yqjD	5	3	28	19	24	0.000350613	0.000246596	0.000318466		0.703328	0.908313	0.513884	0.69912	0.373227		Uncharacterized protein OS=Escherichia coli (strain B / BL21-DE3) OX=469008 GN=ECBD_0641 PE=4 SV=1
401	A0A140N8R4	zapA	4	3	28	19	26	0.00032488	0.000228497	0.000319684		0.703328	0.984005	0.624534	0.742109	0.373227		Cell division protein ZapA OS=Escherichia coli (strain B / BL21-DE3) OX=469008 GN=zapA PE=3 SV=1
1559	A0A140NC38	ybfF	8	2	28	19	6	0.000139417	9.80559e-05	3.16586e-05		0.703328	0.227078	0.212212	0.106246	0.373227		Alpha/beta hydrolase fold protein OS=Escherichia coli (strain B / BL21-DE3) OX=469008 GN=ECBD_2975 PE=4 SV=1
1333	A0A140SS82	murB	7	5	28	19	10	0.000103544	7.28251e-05	3.91875e-05		0.703328	0.378464	0.281548	0.248634	0.373227		UDP-N-acetylenolpyruvoylglucosamine reductase OS=Escherichia coli (strain B / BL21-DE3) OX=469008 GN=murB PE=3 SV=1
802	A0A140ND38	ilvA	20	16	124	84	82	0.000304513	0.000213809	0.000213393		0.702134	0.700768	0.613865	0.551804	0.372103		L-threonine dehydratase OS=Escherichia coli (strain B / BL21-DE3) OX=469008 GN=ilvA PE=3 SV=1
771	A0A140N7N4	nuoA	4	3	34	23	23	0.000292518	0.000205099	0.000209693		0.701151	0.716855	0.560166	0.564799	0.371177		NADH-quinone oxidoreductase subunit A OS=Escherichia coli (strain B / BL21-DE3) OX=469008 GN=nuoA PE=1 SV=1
1032	A0A140N9Z7	nuoF	22	21	272	184	143	0.000773037	0.000542015	0.000430675		0.701151	0.557121	0.48049	0.424918	0.371177		NADH-quinone oxidoreductase subunit F OS=Escherichia coli (strain B / BL21-DE3) OX=469008 GN=ECBD_1377 PE=3 SV=1
973	A0A140NE18	hpt	13	10	132	89	74	0.000917263	0.000641021	0.000544921		0.698841	0.594073	0.62224	0.459289	0.369003		Hypoxanthine phosphoribosyltransferase OS=Escherichia coli (strain B / BL21-DE3) OX=469008 GN=ECBD_3494 PE=3 SV=1
1305	A0A140N4H6	dsbC	8	8	46	31	17	0.000246512	0.000172188	9.65407e-05		0.6985	0.391628	0.20333	0.261813	0.368681		Thiol:disulfide interchange protein OS=Escherichia coli (strain B / BL21-DE3) OX=469008 GN=ECBD_0844 PE=3 SV=1
778	A0A140N5W6	hisD	10	11	46	31	31	0.000134048	9.36323e-05	9.57294e-05		0.6985	0.714144	0.351139	0.562628	0.368681		Histidinol dehydrogenase OS=Escherichia coli (strain B / BL21-DE3) OX=469008 GN=hisD PE=3 SV=1
1026	A0A140N7T2	truA	9	5	49	33	26	0.000229522	0.000160215	0.000129057		0.69804	0.562289	0.321437	0.429788	0.368248		tRNA pseudouridine synthase A OS=Escherichia coli (strain B / BL21-DE3) OX=469008 GN=truA PE=3 SV=1
764	A0A140N8N3	galU	10	8	107	72	73	0.000448093	0.000312521	0.000323959		0.697447	0.722972	0.501134	0.569672	0.367689		UTP--glucose-1-phosphate uridylyltransferase OS=Escherichia coli (strain B / BL21-DE3) OX=469008 GN=ECBD_2386 PE=3 SV=1
942	A0A140SS67	ppc	47	37	379	253	221	0.000542838	0.00037559	0.000335433		0.691901	0.617924	0.472486	0.480878	0.362463		Phosphoenolpyruvate carboxylase OS=Escherichia coli (strain B / BL21-DE3) OX=469008 GN=ppc PE=3 SV=1
1475	A0A140N4V0	ptsN	5	6	39	26	11	0.0003026	0.000209093	9.04438e-05		0.690989	0.298889	0.0621084	0.170735	0.361604		PTS IIA-like nitrogen-regulatory protein PtsN OS=Escherichia coli (strain B / BL21-DE3) OX=469008 GN=ECBD_0538 PE=4 SV=1
1151	A0A140NCX0	dinI	3	2	9	6	5	0.000140523	9.71002e-05	8.27292e-05		0.690989	0.588721	0.0930352	0.454378	0.361604		DinI family protein OS=Escherichia coli (strain B / BL21-DE3) OX=469008 GN=ECBD_2539 PE=4 SV=1
983	A0A140NDD6	dxr	11	8	36	24	20	0.000114396	7.90464e-05	6.73473e-05		0.690989	0.588721	0.216011	0.454378	0.361604		1-deoxy-D-xylulose 5-phosphate reductoisomerase OS=Escherichia coli (strain B / BL21-DE3) OX=469008 GN=dxr PE=3 SV=1
1453	A0A140NA02	nupC	4	2	27	18	8	8.5368e-05	5.89884e-05	2.68042e-05		0.690989	0.313985	0.61985	0.185156	0.361604		Nucleoside permease OS=Escherichia coli (strain B / BL21-DE3) OX=469008 GN=ECBD_1280 PE=3 SV=1
1144	A0A140N7U3	yciI	1	1	6	4	4	7.74313e-05	5.35042e-05	5.47025e-05		0.690989	0.706465	0.189637	0.556436	0.361604		YCII-related OS=Escherichia coli (strain B / BL21-DE3) OX=469008 GN=ECBD_2371 PE=4 SV=1
1175	A0A140NG27	lplA	5	2	18	12	8	6.73515e-05	4.65391e-05	3.1721e-05		0.690989	0.470977	0.503795	0.341253	0.361604		Lipoate-protein ligase A OS=Escherichia coli (strain B / BL21-DE3) OX=469008 GN=lplA PE=3 SV=1
1234	A0A140N937	ydfH	5	3	12	8	5	6.65638e-05	4.59948e-05	2.93906e-05		0.690989	0.441541	0.571668	0.311891	0.361604		Transcriptional regulator, GntR family OS=Escherichia coli (strain B / BL21-DE3) OX=469008 GN=ECBD_2099 PE=4 SV=1
921	A0A140N7V5	lrhA	4	5	15	10	9	6.08034e-05	4.20145e-05	3.866e-05		0.690989	0.635819	0.383077	0.496747	0.361604		Transcriptional regulator, LysR family OS=Escherichia coli (strain B / BL21-DE3) OX=469008 GN=ECBD_1371 PE=3 SV=1
1203	A0A140NAQ7	ycjX	11	5	21	14	9	5.7116e-05	3.94665e-05	2.59396e-05		0.690989	0.454156	0.46222	0.324504	0.361604		Uncharacterized protein OS=Escherichia coli (strain B / BL21-DE3) OX=469008 GN=ECBD_2296 PE=4 SV=1
1024	A0A140N864	lolC	6	4	15	10	8	4.75455e-05	3.28534e-05	2.68714e-05		0.690989	0.565172	0.734989	0.432497	0.361604		Lipoprotein releasing system, transmembrane protein, LolC/E family OS=Escherichia coli (strain B / BL21-DE3) OX=469008 GN=ECBD_2485 PE=4 SV=1
1170	A0A140N6I7	sseB	3	2	9	6	2	4.41178e-05	3.04849e-05	1.03892e-05		0.690989	0.235488	0.0237808	0.113356	0.361604		SseB family protein OS=Escherichia coli (strain B / BL21-DE3) OX=469008 GN=ECBD_1162 PE=4 SV=1
1157	A0A140NCU3	yjeK	2	2	9	6	4	3.32819e-05	2.29974e-05	1.5675e-05		0.690989	0.470977	0.404055	0.341253	0.361604		Lysine 2,3-aminomutase YodO family protein OS=Escherichia coli (strain B / BL21-DE3) OX=469008 GN=ECBD_3885 PE=4 SV=1
1161	A0A140N7P0	xseA	5	3	12	8	5	3.32819e-05	2.29974e-05	1.46953e-05		0.690989	0.441541	0.0130289	0.311891	0.361604		Exodeoxyribonuclease 7 large subunit OS=Escherichia coli (strain B / BL21-DE3) OX=469008 GN=xseA PE=3 SV=1
1154	C5W7S9	yfiC	2	2	6	4	3	3.09725e-05	2.14017e-05	1.64108e-05		0.690989	0.529849	0.351139	0.398904	0.361604		tRNA1(Val) (adenine(37)-N6)-methyltransferase OS=Escherichia coli (strain B / BL21-DE3) OX=469008 GN=yfiC PE=3 SV=1
1166	A0A140NBZ0	ybjN	1	1	3	2	1	2.40135e-05	1.65931e-05	8.48236e-06		0.690989	0.353233	0.189637	0.223524	0.361604		Putative sensory transduction regulator OS=Escherichia coli (strain B / BL21-DE3) OX=469008 GN=ECBD_2741 PE=4 SV=1
1162	A0A140N8H9	hybE	1	1	3	2	1	2.34206e-05	1.61834e-05	8.27292e-06		0.690989	0.353233	0.972162	0.223524	0.361604		Hydrogenase-2 operon protein HybE OS=Escherichia coli (strain B / BL21-DE3) OX=469008 GN=ECBD_0746 PE=4 SV=1
1153	A0A140NAY2	holB	4	2	6	4	3	2.27194e-05	1.56988e-05	1.20378e-05		0.690989	0.529849	0.503795	0.398904	0.361604		DNA polymerase III, delta prime subunit OS=Escherichia coli (strain B / BL21-DE3) OX=469008 GN=ECBD_2502 PE=4 SV=1
1158	A0A140NDL4	ybjD	3	2	9	6	4	2.06203e-05	1.42484e-05	9.71168e-06		0.690989	0.470977	0.503795	0.341253	0.361604		Toprim domain-containing protein OS=Escherichia coli (strain B / BL21-DE3) OX=469008 GN=ECBD_2718 PE=4 SV=1
1148	A0A140NAU8	rimJ	2	2	3	2	2	1.95574e-05	1.35139e-05	1.38166e-05		0.690989	0.706465	0.987709	0.556436	0.361604		Ribosomal-protein-alanine N-acetyltransferase OS=Escherichia coli (strain B / BL21-DE3) OX=469008 GN=ECBD_2534 PE=4 SV=1
1167	A0A140N9M2	yfcF	2	1	3	2	1	1.77296e-05	1.2251e-05	6.26267e-06		0.690989	0.353233	0.189637	0.223524	0.361604		Glutathione S-transferase domain protein OS=Escherichia coli (strain B / BL21-DE3) OX=469008 GN=ECBD_1358 PE=4 SV=1
1163	A0A140NB08	fsaA	2	1	3	2	1	1.72461e-05	1.19168e-05	6.09187e-06		0.690989	0.353233	0.189637	0.223524	0.361604		Fructose-6-phosphate aldolase OS=Escherichia coli (strain B / BL21-DE3) OX=469008 GN=fsa PE=3 SV=1
1141	A0A140NCJ2	ybcM	1	1	3	2	4	1.43175e-05	9.89323e-06	2.02296e-05		0.690989	1.41293	0.734989	0.898978	0.361604		Transcriptional regulator, AraC family OS=Escherichia coli (strain B / BL21-DE3) OX=469008 GN=ECBD_3112 PE=4 SV=1
1142	A0A140NFQ3	ilvY	2	3	3	2	3	1.27749e-05	8.82729e-06	1.35375e-05		0.690989	1.0597	0.734989	0.779818	0.361604		Transcriptional regulator, LysR family OS=Escherichia coli (strain B / BL21-DE3) OX=469008 GN=ECBD_4266 PE=3 SV=1
1146	A0A140N478	ybl158	2	2	3	2	2	1.12252e-05	7.75652e-06	7.93025e-06		0.690989	0.706465	0.734989	0.556436	0.361604		Lipopolysaccharide 3-alpha-galactosyltransferase OS=Escherichia coli (strain B / BL21-DE3) OX=469008 GN=ECBD_0097 PE=4 SV=1
1139	A0A140NAP8	flhB	1	2	3	2	5	9.93229e-06	6.8631e-06	1.7542e-05		0.690989	1.76616	0.869138	0.955919	0.361604		Flagellar biosynthetic protein FlhB OS=Escherichia coli (strain B / BL21-DE3) OX=469008 GN=flhB PE=3 SV=1
1156	A0A140N4N5	recB	3	3	9	6	4	9.6461e-06	6.66535e-06	4.54309e-06		0.690989	0.470977	0.0930352	0.341253	0.361604		RecBCD enzyme subunit RecB OS=Escherichia coli (strain B / BL21-DE3) OX=469008 GN=recB PE=3 SV=1
1145	A0A140NBC9	murJ	2	2	3	2	2	7.42492e-06	5.13054e-06	5.24545e-06		0.690989	0.706465	0.938569	0.556436	0.361604		Probable lipid II flippase MurJ OS=Escherichia coli (strain B / BL21-DE3) OX=469008 GN=murJ PE=3 SV=1
1165	A0A140ND19	appC	1	1	3	2	1	7.38158e-06	5.10059e-06	2.60742e-06		0.690989	0.353233	0.972162	0.223524	0.361604		Cytochrome bd ubiquinol oxidase subunit I OS=Escherichia coli (strain B / BL21-DE3) OX=469008 GN=ECBD_2617 PE=3 SV=1
1147	A0A140NB83	hyaB	1	1	3	2	2	6.35533e-06	4.39147e-06	4.48982e-06		0.690989	0.706465	0.734989	0.556436	0.361604		Nickel-dependent hydrogenase large subunit OS=Escherichia coli (strain B / BL21-DE3) OX=469008 GN=ECBD_2622 PE=3 SV=1
1164	A0A140N6V8	kefB	2	1	3	2	1	6.31303e-06	4.36224e-06	2.22997e-06		0.690989	0.353233	0.189637	0.223524	0.361604		Glutathione-regulated potassium-efflux system protein KefB OS=Escherichia coli (strain B / BL21-DE3) OX=469008 GN=kefB PE=3 SV=1
1140	A0A140N8W0	macB	2	3	3	2	4	5.85515e-06	4.04584e-06	8.27292e-06		0.690989	1.41293	0.734989	0.898978	0.361604		Macrolide export ATP-binding/permease protein MacB OS=Escherichia coli (strain B / BL21-DE3) OX=469008 GN=macB PE=3 SV=1
1143	A0A140N6C9	yehI	1	3	3	2	3	3.13565e-06	2.1667e-06	3.32284e-06		0.690989	1.0597	0.938569	0.779818	0.361604		DUF4132 domain-containing protein OS=Escherichia coli (strain B / BL21-DE3) OX=469008 GN=ECBD_1542 PE=4 SV=1
1169	A0A140N1Y4	tdh	8	8	110	73	49	0.000407971	0.000280622	0.000192582		0.687848	0.472047	0.377309	0.342315	0.358642		L-threonine 3-dehydrogenase OS=Escherichia coli (strain B / BL21-DE3) OX=469008 GN=tdh PE=3 SV=1
1085	A0A140NCE4	adhE	37	29	309	205	154	0.000438604	0.000301599	0.000231642		0.687635	0.528134	0.426126	0.397252	0.358441		Aldehyde-alcohol dehydrogenase OS=Escherichia coli (strain B / BL21-DE3) OX=469008 GN=ECBD_2383 PE=3 SV=1
858	A0A140N3M3	tldD	9	14	86	57	54	0.000226123	0.00015534	0.00015046		0.686972	0.665392	0.619237	0.522321	0.357816		Protease TldD OS=Escherichia coli (strain B / BL21-DE3) OX=469008 GN=ECBD_0502 PE=4 SV=1
873	A0A140N745	nuoC	33	30	427	282	266	0.000900053	0.000616101	0.000594161		0.684516	0.66014	0.455227	0.517839	0.3555		NADH-quinone oxidoreductase subunit C/D OS=Escherichia coli (strain B / BL21-DE3) OX=469008 GN=nuoC PE=3 SV=1
1511	A0A140NEF7	deoB	12	8	85	56	22	0.000264129	0.000180363	7.24439e-05		0.68286	0.274275	0.0940498	0.147767	0.353937		Phosphopentomutase OS=Escherichia coli (strain B / BL21-DE3) OX=469008 GN=deoB PE=3 SV=1
1102	A0A140N665	yghJ	24	23	105	69	50	8.73649e-05	5.95058e-05	4.40859e-05		0.681118	0.504618	0.30949	0.374416	0.352294		Lipoprotein AcfD-like protein OS=Escherichia coli (strain B / BL21-DE3) OX=469008 GN=ECBD_0765 PE=4 SV=1
1091	A0A140NDD5	cydC	13	7	35	23	17	7.72511e-05	5.26171e-05	3.9762e-05		0.681118	0.514711	0.543376	0.384256	0.352294		ABC transporter, CydDC cysteine exporter (CydDC-E) family, permease/ATP-binding protein CydC OS=Escherichia coli (strain B / BL21-DE3) OX=469008 GN=ECBD_2709 PE=4 SV=1
968	A0A140NBV0	ftsI	12	10	32	21	18	6.88278e-05	4.68162e-05	4.10269e-05		0.680192	0.59608	0.46752	0.461125	0.351421		Peptidoglycan D,D-transpeptidase FtsI OS=Escherichia coli (strain B / BL21-DE3) OX=469008 GN=ftsI PE=3 SV=1
1394	A0A140N3S1	yhbY	5	4	29	19	9	0.00037811	0.000256765	0.00012435		0.679075	0.328872	0.551302	0.199581	0.350367		CRM domain-containing protein OS=Escherichia coli (strain B / BL21-DE3) OX=469008 GN=ECBD_0562 PE=4 SV=1
1361	A0A140NCD3	rdgC	6	2	29	19	10	0.000112851	7.66345e-05	4.12373e-05		0.679075	0.365413	0.367722	0.235616	0.350367		Recombination-associated protein RdgC OS=Escherichia coli (strain B / BL21-DE3) OX=469008 GN=rdgC PE=3 SV=1
872	A0A140N613	yicC	17	15	133	87	83	0.000586086	0.000397366	0.000387588		0.678001	0.661315	0.39068	0.518845	0.349353		YicC domain protein OS=Escherichia coli (strain B / BL21-DE3) OX=469008 GN=ECBD_0082 PE=4 SV=1
1396	A0A140N7X1	yeeN	7	7	78	51	24	0.000414485	0.000280897	0.000135147		0.677701	0.326061	0.120712	0.196843	0.34907		Probable transcriptional regulatory protein YeeN OS=Escherichia coli (strain B / BL21-DE3) OX=469008 GN=yeeN PE=3 SV=1
727	A0A140NF15	aceA	13	10	52	34	37	0.000151532	0.000102694	0.000114258		0.677701	0.754016	0.47602	0.593814	0.34907		Isocitrate lyase OS=Escherichia coli (strain B / BL21-DE3) OX=469008 GN=ECBD_4022 PE=4 SV=1
1573	A0A140NAR9	ruvB	8	2	26	17	5	9.78646e-05	6.63229e-05	1.99436e-05		0.677701	0.203788	0.131639	0.0873418	0.34907		Holliday junction ATP-dependent DNA helicase RuvB OS=Escherichia coli (strain B / BL21-DE3) OX=469008 GN=ruvB PE=3 SV=1
947	A0A140N843	visC	9	9	26	17	15	8.22062e-05	5.57112e-05	5.0258e-05		0.677701	0.611364	0.387943	0.47499	0.34907		Ubiquinone biosynthesis hydroxylase, UbiH/UbiF/VisC/COQ6 family OS=Escherichia coli (strain B / BL21-DE3) OX=469008 GN=ECBD_0831 PE=4 SV=1
833	A0A140N4K8	glnB	10	10	98	64	63	0.00110662	0.000749059	0.000753869		0.676887	0.681235	0.465252	0.535677	0.348303		Nitrogen regulatory protein P-II OS=Escherichia coli (strain B / BL21-DE3) OX=469008 GN=ECBD_1131 PE=3 SV=1
1187	A0A140NDY3	slt	11	3	23	15	4	4.50982e-05	3.04849e-05	8.31139e-06		0.675968	0.184295	0.372026	0.0725143	0.347435		Lytic transglycosylase catalytic OS=Escherichia coli (strain B / BL21-DE3) OX=469008 GN=ECBD_3628 PE=4 SV=1
1188	A0A140N9Y8	mdoD	11	1	23	15	2	5.39673e-05	3.64801e-05	4.97296e-06		0.675968	0.0921477	0.0330063	0.018548	0.347435		Glucans biosynthesis protein D OS=Escherichia coli (strain B / BL21-DE3) OX=469008 GN=mdoD PE=3 SV=1
943	A0A140NBB3	pykA	23	21	250	163	145	0.000658704	0.000445144	0.000404856		0.675787	0.614625	0.477238	0.477921	0.347265		Pyruvate kinase OS=Escherichia coli (strain B / BL21-DE3) OX=469008 GN=ECBD_1784 PE=3 SV=1
1508	A0A140ND10	ppiB	6	6	244	159	64	0.00188164	0.00127089	0.00052301		0.675413	0.277954	0.139867	0.151151	0.346912		Peptidyl-prolyl cis-trans isomerase OS=Escherichia coli (strain B / BL21-DE3) OX=469008 GN=ECBD_3133 PE=3 SV=1
819	A0A140N8X9	glyA	24	23	592	385	385	0.00179547	0.00121026	0.00123737		0.674065	0.689162	0.589725	0.542267	0.345639		Serine hydroxymethyltransferase OS=Escherichia coli (strain B / BL21-DE3) OX=469008 GN=glyA PE=3 SV=1
1209	A0A140NGY8	ytfP	4	3	40	26	17	0.000447685	0.000301612	0.000201625		0.673714	0.450372	0.278055	0.320724	0.345309		AIG2 family protein OS=Escherichia coli (strain B / BL21-DE3) OX=469008 GN=ECBD_3808 PE=4 SV=1
1194	A0A140N7S3	ygiN	3	2	20	13	7	0.000243214	0.000163857	9.02066e-05		0.673714	0.370894	0.0436913	0.241077	0.345309		Antibiotic biosynthesis monooxygenase OS=Escherichia coli (strain B / BL21-DE3) OX=469008 GN=ECBD_0710 PE=4 SV=1
995	A0A140N277	dctA	5	3	20	13	11	5.90987e-05	3.98156e-05	3.44447e-05		0.673714	0.582834	0.351139	0.448949	0.345309		C4-dicarboxylate transport protein OS=Escherichia coli (strain B / BL21-DE3) OX=469008 GN=dctA PE=3 SV=1
1327	A0A140ND09	hinT	6	5	97	63	35	0.0010309	0.000693981	0.00039418		0.67318	0.382365	0.139571	0.252536	0.344805		Histidine triad (HIT) protein OS=Escherichia coli (strain B / BL21-DE3) OX=469008 GN=ECBD_2498 PE=4 SV=1
1483	A0A140NAP6	narL	7	4	51	33	14	0.000298612	0.000200269	8.68656e-05		0.670666	0.290898	0.103345	0.163197	0.342433		Two component transcriptional regulator, LuxR family OS=Escherichia coli (strain B / BL21-DE3) OX=469008 GN=ECBD_2398 PE=4 SV=1
1389	A0A140NBC4	lolA	8	7	48	31	15	0.000299045	0.000200179	9.90305e-05		0.669396	0.331156	0.133024	0.201809	0.341234		Outer-membrane lipoprotein carrier protein OS=Escherichia coli (strain B / BL21-DE3) OX=469008 GN=lolA PE=3 SV=1
354	A0A140NCD4	uspG	4	5	48	31	47	0.000427508	0.000286172	0.000443591		0.669396	1.03762	0.37116	0.769341	0.341234		UspA domain protein OS=Escherichia coli (strain B / BL21-DE3) OX=469008 GN=ECBD_3045 PE=4 SV=1
731	A0A140NAQ1	lolD	8	7	31	20	22	0.000168266	0.00011252	0.000126544		0.668699	0.752044	0.512913	0.592309	0.340577		Lipoprotein-releasing system ATP-binding protein LolD OS=Escherichia coli (strain B / BL21-DE3) OX=469008 GN=lolD PE=3 SV=1
1201	A0A140N6T9	pdxK	8	2	31	20	3	0.000138537	9.26398e-05	1.42072e-05		0.668699	0.102551	0.0178481	0.0230624	0.340577		Pyridoxine/pyridoxal/pyridoxamine kinase OS=Escherichia coli (strain B / BL21-DE3) OX=469008 GN=pdxK PE=3 SV=1
1338	A0A140NAR1	nagZ	10	5	31	20	11	0.000114974	7.68828e-05	4.32327e-05		0.668699	0.376022	0.0717743	0.246194	0.340577		Beta-hexosaminidase OS=Escherichia coli (strain B / BL21-DE3) OX=469008 GN=nagZ PE=3 SV=1
829	A0A140NDX4	sucB	31	27	642	414	413	0.0020048	0.00133998	0.00136669		0.668387	0.681706	0.397224	0.53607	0.340282		Dihydrolipoyllysine-residue succinyltransferase component of 2-oxoglutarate dehydrogenase complex OS=Escherichia coli (strain B / BL21-DE3) OX=469008 GN=ECBD_2934 PE=3 SV=1
1090	A0A140N5E8	glmM	19	14	152	98	74	0.000431991	0.000288682	0.000222867		0.668259	0.515906	0.351139	0.385417	0.340162		Phosphoglucosamine mutase OS=Escherichia coli (strain B / BL21-DE3) OX=469008 GN=glmM PE=3 SV=1
1249	A0A140NBC0	radA	11	6	45	29	18	0.000123722	8.26407e-05	5.24431e-05		0.667956	0.423879	0.445075	0.294183	0.339876		DNA repair protein RadA OS=Escherichia coli (strain B / BL21-DE3) OX=469008 GN=radA PE=3 SV=1
723	A0A140NC56	deoD	12	10	87	56	62	0.000460376	0.000307145	0.00034767		0.667162	0.755187	0.411221	0.594705	0.339127		Purine nucleoside phosphorylase DeoD-type OS=Escherichia coli (strain B / BL21-DE3) OX=469008 GN=deoD PE=3 SV=1
1465	A0A140N4A1	mtlD	8	6	28	18	8	9.27014e-05	6.17679e-05	2.80673e-05		0.666311	0.302771	0.246685	0.174422	0.338324		Mannitol-1-phosphate 5-dehydrogenase OS=Escherichia coli (strain B / BL21-DE3) OX=469008 GN=mtlD PE=3 SV=1
953	A0A140N7H8	agaR	5	3	14	9	8	6.58214e-05	4.38575e-05	3.98576e-05		0.666311	0.605542	0.212212	0.469731	0.338324		Transcriptional regulator, DeoR family OS=Escherichia coli (strain B / BL21-DE3) OX=469008 GN=ECBD_0611 PE=4 SV=1
1077	A0A140N3I5	dkgA	8	5	14	9	7	6.43853e-05	4.29006e-05	3.41145e-05		0.666311	0.529849	0.543376	0.398904	0.338324		2,5-didehydrogluconate reductase OS=Escherichia coli (strain B / BL21-DE3) OX=469008 GN=ECBD_0728 PE=4 SV=1
1050	A0A140NFM6	ftsZ	23	19	404	259	205	0.00133406	0.000886451	0.000717346		0.664478	0.537718	0.43061	0.406462	0.336595		Cell division protein FtsZ OS=Escherichia coli (strain B / BL21-DE3) OX=469008 GN=ftsZ PE=3 SV=1
967	A0A140NF57	oxyR	4	3	39	25	22	0.000161717	0.000107447	9.6671e-05		0.664413	0.597778	0.586393	0.462675	0.336533		Transcriptional regulator, LysR family OS=Escherichia coli (strain B / BL21-DE3) OX=469008 GN=ECBD_4063 PE=3 SV=1
1176	A0A140N8D2	yggG	7	4	36	23	16	0.000180673	0.000119641	8.50928e-05		0.662198	0.470977	0.549768	0.341253	0.334444		Peptidase M48 Ste24p OS=Escherichia coli (strain B / BL21-DE3) OX=469008 GN=ECBD_0802 PE=3 SV=1
1214	A0A140NAB2	yciN	6	3	55	35	10	0.000838062	0.000552769	0.000161471		0.65958	0.192672	0.00524136	0.0787669	0.331976		Uncharacterized protein OS=Escherichia coli (strain B / BL21-DE3) OX=469008 GN=ECBD_2349 PE=4 SV=1
593	A0A140N9N0	artP	3	2	11	7	9	5.74869e-05	3.79172e-05	4.98426e-05		0.65958	0.867026	0.553805	0.673317	0.331976		Arginine transporter ATP-binding subunit OS=Escherichia coli (strain B / BL21-DE3) OX=469008 GN=ECBD_2730 PE=4 SV=1
1213	A0A140NBG9	pdxY	3	1	11	7	3	4.86427e-05	3.20838e-05	1.40582e-05		0.65958	0.289009	0.394554	0.161427	0.331976		Pyridoxal kinase PdxY OS=Escherichia coli (strain B / BL21-DE3) OX=469008 GN=pdxY PE=3 SV=1
1358	A0A140NCN7	minC	8	6	52	33	18	0.000284697	0.000187265	0.000104432		0.657768	0.366819	0.183636	0.237015	0.330268		Probable septum site-determining protein MinC OS=Escherichia coli (strain B / BL21-DE3) OX=469008 GN=minC PE=3 SV=1
1314	A0A140N7T0	yhbW	8	6	30	19	11	0.000113258	7.43469e-05	4.4007e-05		0.65644	0.388556	0.445075	0.258734	0.329015		Luciferase-like monooxygenase OS=Escherichia coli (strain B / BL21-DE3) OX=469008 GN=ECBD_0580 PE=4 SV=1
1313	A0A140N9L7	nagC	12	5	30	19	11	9.34516e-05	6.13453e-05	3.63112e-05		0.65644	0.388556	0.474891	0.258734	0.329015		ROK family protein OS=Escherichia coli (strain B / BL21-DE3) OX=469008 GN=ECBD_2986 PE=4 SV=1
1121	A0A140N5E7	ppx	7	7	30	19	14	7.39597e-05	4.85501e-05	3.6575e-05		0.65644	0.494526	0.414434	0.364522	0.329015		Ppx/GppA phosphatase OS=Escherichia coli (strain B / BL21-DE3) OX=469008 GN=ECBD_1186 PE=3 SV=1
1245	A0A140SSA7	ilvG	9	9	57	36	23	0.000131548	8.61144e-05	5.62498e-05		0.654621	0.427597	0.638901	0.297914	0.327301		Acetolactate synthase OS=Escherichia coli (strain B / BL21-DE3) OX=469008 GN=ECBD_4271 PE=3 SV=1
1220	A0A140N6D3	yidR	6	3	19	12	5	5.9479e-05	3.89362e-05	1.65868e-05		0.654621	0.278868	0.0841266	0.151995	0.327301		Uncharacterized protein OS=Escherichia coli (strain B / BL21-DE3) OX=469008 GN=ECBD_0014 PE=4 SV=1
1467	A0A140NEL3	orn	6	4	35	22	10	0.000244557	0.00015933	7.40449e-05		0.651504	0.302771	0.097998	0.174422	0.324364		Oligoribonuclease OS=Escherichia coli (strain B / BL21-DE3) OX=469008 GN=orn PE=3 SV=1
1126	A0A140NBE2	solA	15	11	67	42	31	0.000227784	0.000147999	0.000111684		0.649736	0.490308	0.442363	0.360372	0.322698		N-methyl-L-tryptophan oxidase OS=Escherichia coli (strain B / BL21-DE3) OX=469008 GN=solA PE=3 SV=1
1256	A0A140N5W3	yfbQ	13	10	91	57	36	0.00028417	0.00018449	0.00011913		0.649226	0.419221	0.377499	0.289507	0.322218		Aminotransferase class I and II OS=Escherichia coli (strain B / BL21-DE3) OX=469008 GN=ECBD_1369 PE=4 SV=1
1404	A0A140N7B9	xthA	13	8	72	45	22	0.000334777	0.000216869	0.0001084		0.647802	0.323797	0.429851	0.194643	0.320877		Exodeoxyribonuclease III OS=Escherichia coli (strain B / BL21-DE3) OX=469008 GN=ECBD_1895 PE=4 SV=1
883	A0A140N7N3	gltB	40	30	184	115	113	0.000153399	9.93725e-05	9.98312e-05		0.647802	0.650793	0.554592	0.509799	0.320877		Glutamate synthase (Ferredoxin) OS=Escherichia coli (strain B / BL21-DE3) OX=469008 GN=ECBD_0530 PE=4 SV=1
1078	A0A140NF44	fabR	5	5	24	15	12	0.000129714	8.4029e-05	6.87288e-05		0.647802	0.529849	0.310653	0.398904	0.320877		HTH-type transcriptional repressor FabR OS=Escherichia coli (strain B / BL21-DE3) OX=469008 GN=fabR PE=3 SV=1
1390	A0A140N7Z4	yeiR	7	5	32	20	10	0.000123386	7.993e-05	4.08601e-05		0.647802	0.331156	0.199463	0.201809	0.320877		Cobalamin synthesis protein P47K OS=Escherichia coli (strain B / BL21-DE3) OX=469008 GN=ECBD_1484 PE=4 SV=1
1231	A0A140NBI8	yeaK	4	2	16	10	4	0.00012117	7.84942e-05	3.21009e-05		0.647802	0.264925	0.229377	0.139251	0.320877		YbaK/prolyl-tRNA synthetase associated region OS=Escherichia coli (strain B / BL21-DE3) OX=469008 GN=ECBD_1857 PE=4 SV=1
1227	A0A140NB18	cbpA	3	2	8	5	4	3.30643e-05	2.14192e-05	1.75191e-05		0.647802	0.529849	0.115353	0.398904	0.320877		Curved DNA-binding protein OS=Escherichia coli (strain B / BL21-DE3) OX=469008 GN=cbpA PE=3 SV=1
1224	A0A140SS92	sbp	1	1	8	5	6	3.07529e-05	1.99218e-05	2.44416e-05		0.647802	0.794774	0.351139	0.624003	0.320877		Sulfate ABC transporter, periplasmic sulfate-binding protein OS=Escherichia coli (strain B / BL21-DE3) OX=469008 GN=ECBD_4107 PE=4 SV=1
1228	A0A140NFS3	cytR	3	2	8	5	3	2.96706e-05	1.92207e-05	1.17907e-05		0.647802	0.397387	0.351139	0.267588	0.320877		Transcriptional regulator, LacI family OS=Escherichia coli (strain B / BL21-DE3) OX=469008 GN=ECBD_4090 PE=4 SV=1
1177	A0A140N7R1	ygiC	13	9	77	48	34	0.000252287	0.000163008	0.00011805		0.64612	0.467919	0.146064	0.338214	0.319293		Trypanothione synthase OS=Escherichia coli (strain B / BL21-DE3) OX=469008 GN=ECBD_0702 PE=4 SV=1
1369	A0A140NBX3	dcp	18	15	111	69	37	0.000199691	0.000128661	7.05375e-05		0.644301	0.353233	0.189637	0.223524	0.317581		Peptidyl-dipeptidase Dcp OS=Escherichia coli (strain B / BL21-DE3) OX=469008 GN=ECBD_2101 PE=3 SV=1
1342	A0A140N9V2	trpA	9	6	37	23	13	0.000174606	0.000112499	6.50103e-05		0.644301	0.372326	0.53394	0.242505	0.317581		Tryptophan synthase alpha chain OS=Escherichia coli (strain B / BL21-DE3) OX=469008 GN=trpA PE=3 SV=1
875	A0A140N812	yqjI	8	6	29	18	18	0.000177182	0.000113987	0.00011654		0.643335	0.657744	0.463685	0.515786	0.316672		Transcriptional regulator, PadR-like family OS=Escherichia coli (strain B / BL21-DE3) OX=469008 GN=ECBD_0671 PE=4 SV=1
807	A0A140NEF9	coaA	7	6	29	18	19	0.000116065	7.46688e-05	8.05824e-05		0.643335	0.694285	0.400458	0.546494	0.316672		Pantothenate kinase OS=Escherichia coli (strain B / BL21-DE3) OX=469008 GN=coaA PE=3 SV=1
474	A0A140N8Y2	thyA	12	9	68	42	60	0.000325759	0.000208545	0.000304594		0.640181	0.935028	0.43435	0.71492	0.313706		Thymidylate synthase OS=Escherichia coli (strain B / BL21-DE3) OX=469008 GN=thyA PE=3 SV=1
738	A0A140N8S5	grpE	17	14	298	184	209	0.00191312	0.00122435	0.00142185		0.639976	0.743211	0.507602	0.585523	0.313514		Protein GrpE OS=Escherichia coli (strain B / BL21-DE3) OX=469008 GN=grpE PE=3 SV=1
1218	A0A140NEI9	tolB	20	19	383	236	161	0.00112648	0.000719445	0.0005018		0.638669	0.445461	0.327093	0.315814	0.312285		Tol-Pal system protein TolB OS=Escherichia coli (strain B / BL21-DE3) OX=469008 GN=tolB PE=3 SV=1
1571	A0A140N7K1	ydhR	4	2	26	16	5	0.000325569	0.00020766	6.63471e-05		0.637836	0.203788	0.201742	0.0873418	0.311502		Putative mono-oxygenase ydhR OS=Escherichia coli (strain B / BL21-DE3) OX=469008 GN=ECBD_1978 PE=4 SV=1
1244	A0A140N6B2	yggE	6	6	52	32	21	0.000267337	0.000170517	0.000114408		0.637836	0.427955	0.201742	0.298273	0.311502		Uncharacterized protein OS=Escherichia coli (strain B / BL21-DE3) OX=469008 GN=ECBD_0816 PE=4 SV=1
1243	A0A140N4P2	rfaQ	4	2	26	16	3	9.67132e-05	6.16872e-05	1.18254e-05		0.637836	0.122273	0.0709001	0.0328271	0.311502		Lipopolysaccharide heptosyltransferase III OS=Escherichia coli (strain B / BL21-DE3) OX=469008 GN=ECBD_0094 PE=4 SV=1
1241	A0A140N5V4	yfcE	3	3	13	8	4	8.98429e-05	5.7305e-05	2.92943e-05		0.637836	0.326061	0.0459415	0.196843	0.311502		Phosphoesterase OS=Escherichia coli (strain B / BL21-DE3) OX=469008 GN=ECBD_1359 PE=3 SV=1
818	A0A140N9N5	ptsI	37	34	841	517	547	0.00184978	0.00117863	0.00127495		0.637172	0.689245	0.514205	0.542336	0.310879		Phosphoenolpyruvate-protein phosphotransferase OS=Escherichia coli (strain B / BL21-DE3) OX=469008 GN=ECBD_1265 PE=3 SV=1
1355	A0A140SSB0	udp	10	9	127	78	44	0.000632356	0.000402545	0.000232163		0.63658	0.36714	0.354937	0.237335	0.310322		Uridine phosphorylase OS=Escherichia coli (strain B / BL21-DE3) OX=469008 GN=ECBD_4198 PE=3 SV=1
984	A0A140NFK0	metH	38	29	243	149	135	0.000250469	0.000159183	0.000147456		0.635539	0.588721	0.41175	0.454378	0.309344		Methionine synthase OS=Escherichia coli (strain B / BL21-DE3) OX=469008 GN=ECBD_4018 PE=4 SV=1
795	A0A140NDQ0	rraB	2	1	18	11	12	0.000164962	0.000104488	0.00011654		0.633407	0.706465	0.592822	0.556436	0.307342		Regulator of ribonuclease activity B OS=Escherichia coli (strain B / BL21-DE3) OX=469008 GN=rraB PE=3 SV=1
667	A0A140NAN3	icd	35	32	1005	613	760	0.00305537	0.00193162	0.00244846		0.632203	0.801364	0.480573	0.628723	0.306213		Isocitrate dehydrogenase [NADP] OS=Escherichia coli (strain B / BL21-DE3) OX=469008 GN=ECBD_2463 PE=4 SV=1
380	A0A140N7S8	sohB	7	7	41	25	39	0.000148576	9.39006e-05	0.000149766		0.632002	1.00801	0.662875	0.754618	0.306024		Peptidase S49 domain protein OS=Escherichia coli (strain B / BL21-DE3) OX=469008 GN=ECBD_2350 PE=4 SV=1
1251	A0A140N8W5	hisA	7	2	23	14	2	0.000118728	7.49059e-05	1.09405e-05		0.630903	0.0921477	0.0330063	0.018548	0.304992		1-(5-phosphoribosyl)-5-[(5-phosphoribosylamino)methylideneamino] imidazole-4-carboxamide isomerase OS=Escherichia coli (strain B / BL21-DE3) OX=469008 GN=hisA PE=3 SV=1
1191	A0A140NE32	mrr	5	6	23	14	10	9.56854e-05	6.03682e-05	4.40859e-05		0.630903	0.460738	0.20333	0.331069	0.304992		Restriction endonuclease OS=Escherichia coli (strain B / BL21-DE3) OX=469008 GN=ECBD_3679 PE=4 SV=1
773	A0A140NFE9	hlpA	14	12	222	135	150	0.00174389	0.00109916	0.00124864		0.630294	0.716012	0.56992	0.564125	0.304421		Outer membrane chaperone Skp (OmpH) OS=Escherichia coli (strain B / BL21-DE3) OX=469008 GN=ECBD_3441 PE=3 SV=1
1255	A0A140N9H6	ydgH	17	15	199	121	79	0.000801521	0.000505137	0.000337187		0.630224	0.420684	0.30472	0.290976	0.304355		Uncharacterized protein OS=Escherichia coli (strain B / BL21-DE3) OX=469008 GN=ECBD_2042 PE=4 SV=1
913	A0A140N6R8	damX	22	21	196	119	118	0.000579167	0.000364466	0.000369498		0.629294	0.637982	0.404586	0.498645	0.303483		Cell division protein DamX OS=Escherichia coli (strain B / BL21-DE3) OX=469008 GN=damX PE=3 SV=1
1125	A0A140NFA2	yiiM	7	6	28	17	13	0.000158089	9.94843e-05	7.77802e-05		0.629294	0.492003	0.178521	0.36204	0.303483		MOSC domain containing protein OS=Escherichia coli (strain B / BL21-DE3) OX=469008 GN=ECBD_4113 PE=4 SV=1
1540	A0A140N883	exuR	9	4	33	20	8	0.000161765	0.000101616	4.1557e-05		0.628172	0.256897	0.161616	0.132045	0.302431		Regulatory protein GntR HTH OS=Escherichia coli (strain B / BL21-DE3) OX=469008 GN=ECBD_0646 PE=4 SV=1
1260	A0A140N788	gltD	9	6	33	20	13	8.84226e-05	5.55446e-05	3.69126e-05		0.628172	0.417457	0.529223	0.287736	0.302431		Glutamate synthase, small subunit OS=Escherichia coli (strain B / BL21-DE3) OX=469008 GN=ECBD_0529 PE=4 SV=1
1310	A0A140NCE0	cusC	11	7	38	23	14	0.000105162	6.59729e-05	4.10568e-05		0.627345	0.390415	0.351139	0.260597	0.301657		RND efflux system, outer membrane lipoprotein, NodT family OS=Escherichia coli (strain B / BL21-DE3) OX=469008 GN=ECBD_3090 PE=3 SV=1
1393	A0A140N8N0	luxS	8	6	106	64	33	0.000783973	0.000490611	0.000258637		0.625801	0.329906	0.135411	0.200589	0.30021		S-ribosylhomocysteine lyase OS=Escherichia coli (strain B / BL21-DE3) OX=469008 GN=luxS PE=3 SV=1
838	A0A140N210	selB	17	11	53	32	34	0.000109169	6.8318e-05	7.42137e-05		0.625801	0.679806	0.249963	0.534483	0.30021		Selenocysteine-specific translation elongation factor OS=Escherichia coli (strain B / BL21-DE3) OX=469008 GN=ECBD_0140 PE=4 SV=1
293	A0A140N783	gapA	26	28	697	419	743	0.00266315	0.00165936	0.00300839		0.62308	1.12964	0.419808	0.810335	0.297662		Glyceraldehyde-3-phosphate dehydrogenase OS=Escherichia coli (strain B / BL21-DE3) OX=469008 GN=ECBD_1865 PE=3 SV=1
1480	A0A140N307	ybl141	6	3	25	15	7	0.000313047	0.000194681	9.2886e-05		0.62189	0.296715	0.29273	0.168678	0.296549		IS600 orf OS=Escherichia coli (strain B / BL21-DE3) OX=469008 GN=ECBD_0527 PE=4 SV=1
1159	A0A140NDC1	ycfP	7	5	40	24	18	0.000281047	0.00017478	0.000134021		0.62189	0.476864	0.0763837	0.347092	0.296549		UPF0227 protein YcfP OS=Escherichia coli (strain B / BL21-DE3) OX=469008 GN=ycfP PE=3 SV=1
1289	A0A140N7M2	hscB	9	3	35	21	5	0.000258859	0.000160982	3.91875e-05		0.62189	0.151385	0.0252016	0.0498937	0.296549		Co-chaperone protein HscB OS=Escherichia coli (strain B / BL21-DE3) OX=469008 GN=hscB PE=3 SV=1
1222	A0A140NB59	pfkB	8	6	50	30	21	0.000204646	0.000127267	9.10824e-05		0.62189	0.445073	0.408216	0.315426	0.296549		Phosphofructokinase OS=Escherichia coli (strain B / BL21-DE3) OX=469008 GN=ECBD_1922 PE=3 SV=1
1204	A0A140N7S5	plsC	3	3	35	21	15	0.000180673	0.000112359	8.20538e-05		0.62189	0.454156	0.470686	0.324504	0.296549		1-acyl-sn-glycerol-3-phosphate acyltransferase OS=Escherichia coli (strain B / BL21-DE3) OX=469008 GN=ECBD_0722 PE=3 SV=1
1388	A0A140N6T1	murQ	7	4	35	21	11	0.00014854	9.23755e-05	4.94709e-05		0.62189	0.333048	0.22593	0.203658	0.296549		N-acetylmuramic acid 6-phosphate etherase OS=Escherichia coli (strain B / BL21-DE3) OX=469008 GN=murQ PE=2 SV=1
1280	A0A140N9T9	yfcZ	2	1	10	6	2	0.000134544	8.36714e-05	2.85152e-05		0.62189	0.21194	0.351139	0.0938202	0.296549		Uncharacterized protein OS=Escherichia coli (strain B / BL21-DE3) OX=469008 GN=ECBD_1317 PE=4 SV=1
1279	A0A140NCW0	flgM	2	1	10	6	2	0.000130383	8.10837e-05	2.76332e-05		0.62189	0.21194	0.0763837	0.0938202	0.296549		Putative anti-sigma-28 factor, FlgM OS=Escherichia coli (strain B / BL21-DE3) OX=469008 GN=ECBD_2529 PE=4 SV=1
824	A0A140NAF5	amn	13	8	45	27	29	0.000117587	7.31261e-05	8.0302e-05		0.62189	0.682917	0.76869	0.53708	0.296549		AMP nucleosidase OS=Escherichia coli (strain B / BL21-DE3) OX=469008 GN=amn PE=3 SV=1
1531	A0A140NEJ3	nfsB	6	2	20	12	5	0.000116563	7.24895e-05	3.08805e-05		0.62189	0.264925	0.609201	0.139251	0.296549		6,7-dihydropteridine reductase OS=Escherichia coli (strain B / BL21-DE3) OX=469008 GN=ECBD_3084 PE=4 SV=1
1350	A0A140N4E5	rfaG	8	6	20	12	7	6.76316e-05	4.20594e-05	2.50842e-05		0.62189	0.370894	0.351139	0.241077	0.296549		Glycosyl transferase group 1 OS=Escherichia coli (strain B / BL21-DE3) OX=469008 GN=ECBD_0095 PE=4 SV=1
1079	A0A140NEE0	ybdG	7	6	20	12	10	6.09499e-05	3.79042e-05	3.22943e-05		0.62189	0.529849	0.489462	0.398904	0.296549		MscS Mechanosensitive ion channel OS=Escherichia coli (strain B / BL21-DE3) OX=469008 GN=ECBD_3085 PE=4 SV=1
1276	A0A140NF00	ybl214	2	1	10	6	3	4.51683e-05	2.80897e-05	1.43594e-05		0.62189	0.317909	0.253638	0.188941	0.296549		Xylose isomerase domain protein TIM barrel OS=Escherichia coli (strain B / BL21-DE3) OX=469008 GN=ECBD_3826 PE=4 SV=1
922	A0A140N498	glcB	9	5	25	15	15	4.37314e-05	2.71961e-05	2.78052e-05		0.62189	0.635819	0.370363	0.496747	0.296549		Malate synthase G OS=Escherichia coli (strain B / BL21-DE3) OX=469008 GN=glcB PE=3 SV=1
1269	A0A140N4G5	kefG	2	2	5	3	2	3.4555e-05	2.14894e-05	1.46471e-05		0.62189	0.423879	0.609201	0.294183	0.296549		Glutathione-regulated potassium-efflux system ancillary protein KefG OS=Escherichia coli (strain B / BL21-DE3) OX=469008 GN=kefG PE=3 SV=1
1288	A0A140N8X8	yecM	3	1	5	3	1	3.36359e-05	2.09179e-05	7.12879e-06		0.62189	0.21194	0.0763837	0.0938202	0.296549		Uncharacterized protein OS=Escherichia coli (strain B / BL21-DE3) OX=469008 GN=ECBD_1763 PE=4 SV=1
1284	A0A140N9L4	ubiX	2	1	5	3	1	3.3458e-05	2.08072e-05	7.09107e-06		0.62189	0.21194	0.609201	0.0938202	0.296549		Flavin prenyltransferase UbiX OS=Escherichia coli (strain B / BL21-DE3) OX=469008 GN=ubiX PE=3 SV=1
1286	A0A140NBN2	ybl29	2	1	5	3	1	3.3458e-05	2.08072e-05	7.09107e-06		0.62189	0.21194	0.0763837	0.0938202	0.296549		CI repressor OS=Escherichia coli (strain B / BL21-DE3) OX=469008 GN=ECBD_2773 PE=4 SV=1
1271	A0A140N5W1	lptC	1	2	5	3	2	3.31076e-05	2.05893e-05	1.40336e-05		0.62189	0.423879	0.825202	0.294183	0.296549		Lipopolysaccharide export system protein LptC OS=Escherichia coli (strain B / BL21-DE3) OX=469008 GN=lptC PE=3 SV=1
1270	A0A140NF85	yafJ	2	1	5	3	2	2.47983e-05	1.54218e-05	1.05115e-05		0.62189	0.423879	0.253638	0.294183	0.296549		Glutamine amidotransferase class-II OS=Escherichia coli (strain B / BL21-DE3) OX=469008 GN=ECBD_3399 PE=4 SV=1
1287	A0A140NH36	birA	2	1	5	3	1	1.96996e-05	1.2251e-05	4.17512e-06		0.62189	0.21194	0.609201	0.0938202	0.296549		Bifunctional ligase/repressor BirA OS=Escherichia coli (strain B / BL21-DE3) OX=469008 GN=birA PE=3 SV=1
1285	A0A140N709	yhiN	3	1	5	3	1	1.58089e-05	9.83139e-06	3.35053e-06		0.62189	0.21194	0.445075	0.0938202	0.296549		HI0933 family protein OS=Escherichia coli (strain B / BL21-DE3) OX=469008 GN=ECBD_0249 PE=4 SV=1
1281	A0A140N6Q4	yedV	1	1	5	3	1	1.39902e-05	8.70035e-06	2.96507e-06		0.62189	0.21194	0.253638	0.0938202	0.296549		Sensor protein OS=Escherichia coli (strain B / BL21-DE3) OX=469008 GN=ECBD_1679 PE=4 SV=1
1268	A0A140ND28	yjcE	3	1	5	3	2	1.15183e-05	7.16313e-06	4.88238e-06		0.62189	0.423879	0.253638	0.294183	0.296549		Na+/H+ antiporter OS=Escherichia coli (strain B / BL21-DE3) OX=469008 GN=ECBD_3967 PE=3 SV=1
1273	A0A140NAI1	yejH	2	2	5	3	2	1.07911e-05	6.71085e-06	4.5741e-06		0.62189	0.423879	0.609201	0.294183	0.296549		Type III restriction protein res subunit OS=Escherichia coli (strain B / BL21-DE3) OX=469008 GN=ECBD_1473 PE=4 SV=1
1283	A0A140NFR1	kup	3	1	5	3	1	1.01665e-05	6.32244e-06	2.15468e-06		0.62189	0.21194	0.0763837	0.0938202	0.296549		Low affinity potassium transport system protein kup OS=Escherichia coli (strain B / BL21-DE3) OX=469008 GN=kup PE=3 SV=1
1272	A0A140NA81	yejO	1	1	5	3	2	7.32741e-06	4.55685e-06	3.10594e-06		0.62189	0.423879	0.92831	0.294183	0.296549		Pertactin OS=Escherichia coli (strain B / BL21-DE3) OX=469008 GN=ECBD_1468 PE=4 SV=1
1282	A0A140N765	yhdP	2	1	5	3	1	4.99491e-06	3.10629e-06	1.05862e-06		0.62189	0.21194	0.253638	0.0938202	0.296549		Uncharacterized protein YhdP OS=Escherichia coli (strain B / BL21-DE3) OX=469008 GN=ECBD_0501 PE=4 SV=1
931	A0A140NDZ9	sdhB	12	13	199	119	118	0.00105747	0.000655426	0.000664475		0.619807	0.628364	0.456865	0.490171	0.2946		Succinate dehydrogenase iron-sulfur subunit OS=Escherichia coli (strain B / BL21-DE3) OX=469008 GN=ECBD_2936 PE=3 SV=1
1226	A0A140NC78	nagE	11	6	74	44	31	0.000144427	8.90085e-05	6.41151e-05		0.616288	0.443928	0.311752	0.31428	0.291312		PTS system, N-acetylglucosamine-specific IIBC subunit OS=Escherichia coli (strain B / BL21-DE3) OX=469008 GN=ECBD_2983 PE=4 SV=1
828	A0A140NGG3	arcA	16	13	160	95	103	0.000850226	0.000523239	0.000580008		0.615412	0.682181	0.51087	0.536466	0.290495		Two component transcriptional regulator, winged helix family OS=Escherichia coli (strain B / BL21-DE3) OX=469008 GN=ECBD_3619 PE=4 SV=1
856	A0A140NE66	sucA	46	44	950	564	599	0.00128776	0.000792412	0.000860436		0.615344	0.668168	0.414107	0.524678	0.290431		2-oxoglutarate dehydrogenase, E1 subunit OS=Escherichia coli (strain B / BL21-DE3) OX=469008 GN=ECBD_2935 PE=4 SV=1
1311	A0A140NDX8	hflX	19	12	76	45	28	0.000225629	0.00013847	8.80891e-05		0.613707	0.390415	0.44984	0.260597	0.288905		GTPase HflX OS=Escherichia coli (strain B / BL21-DE3) OX=469008 GN=hflX PE=3 SV=1
850	A0A140NC83	tyrR	8	9	22	13	14	5.42371e-05	3.32185e-05	3.6575e-05		0.612468	0.674353	0.682568	0.529906	0.287748		Transcriptional regulator, TyrR OS=Escherichia coli (strain B / BL21-DE3) OX=469008 GN=ECBD_2294 PE=4 SV=1
977	A0A140NEB2	dapB	9	8	61	36	34	0.000282591	0.00017286	0.000166913		0.611695	0.590651	0.359038	0.456152	0.287028		4-hydroxy-tetrahydrodipicolinate reductase OS=Escherichia coli (strain B / BL21-DE3) OX=469008 GN=dapB PE=3 SV=1
1190	A0A140NF66	katG	33	28	287	169	125	0.000499962	0.000305143	0.000230753		0.610334	0.461541	0.274732	0.331868	0.28576		Catalase-peroxidase OS=Escherichia coli (strain B / BL21-DE3) OX=469008 GN=katG PE=3 SV=1
1298	A0A140NE08	fxsA	3	2	17	10	4	0.000136077	8.29654e-05	3.39294e-05		0.609696	0.249341	0.208199	0.125357	0.285166		FxsA cytoplasmic membrane protein OS=Escherichia coli (strain B / BL21-DE3) OX=469008 GN=ECBD_3891 PE=4 SV=1
1348	A0A140NDV2	ihfB	7	7	114	67	40	0.0015338	0.000934331	0.000570303		0.609161	0.371824	0.401311	0.242004	0.284668		Integration host factor subunit beta OS=Escherichia coli (strain B / BL21-DE3) OX=469008 GN=ihfB PE=3 SV=1
956	A0A140NG32	panC	13	9	111	65	63	0.000496053	0.000301079	0.000298351		0.60695	0.60145	0.44016	0.466019	0.28261		Pantothenate synthetase OS=Escherichia coli (strain B / BL21-DE3) OX=469008 GN=panC PE=3 SV=1
851	A0A140N9P3	nuoG	44	40	653	382	414	0.000909534	0.000551482	0.000611066		0.606335	0.671845	0.518888	0.527791	0.282038		NADH-quinone oxidoreductase OS=Escherichia coli (strain B / BL21-DE3) OX=469008 GN=ECBD_1378 PE=3 SV=1
803	A0A140N7H9	pdxJ	7	5	53	31	35	0.000275842	0.000167228	0.000193035		0.606245	0.699801	0.498415	0.551014	0.281955		Pyridoxine 5'-phosphate synthase OS=Escherichia coli (strain B / BL21-DE3) OX=469008 GN=pdxJ PE=3 SV=1
1192	A0A140NFS6	murF	6	5	53	31	23	0.000148296	8.99036e-05	6.81966e-05		0.606245	0.459869	0.498415	0.330202	0.281955		UDP-N-acetylmuramoyl-tripeptide--D-alanyl-D-alanine ligase OS=Escherichia coli (strain B / BL21-DE3) OX=469008 GN=murF PE=3 SV=1
1307	A0A140N9N3	ybeL	2	2	12	7	3	9.48533e-05	5.73498e-05	2.5129e-05		0.604615	0.264925	0.189637	0.139251	0.28044		Uncharacterized protein OS=Escherichia coli (strain B / BL21-DE3) OX=469008 GN=ECBD_3008 PE=4 SV=1
1308	A0A140NEM8	hemH	5	2	12	7	2	4.74267e-05	2.86749e-05	8.37633e-06		0.604615	0.176616	0.351139	0.0669504	0.28044		Ferrochelatase OS=Escherichia coli (strain B / BL21-DE3) OX=469008 GN=hemH PE=3 SV=1
220	A0A140N908	mltB	3	4	12	7	14	4.20403e-05	2.54182e-05	5.1975e-05		0.604615	1.23631	0.571668	0.849717	0.28044		Lytic murein transglycosylase B OS=Escherichia coli (strain B / BL21-DE3) OX=469008 GN=ECBD_1024 PE=4 SV=1
1306	A0A140NB96	lacI	5	3	12	7	3	4.18086e-05	2.52781e-05	1.10761e-05		0.604615	0.264925	0.269906	0.139251	0.28044		Transcriptional regulator, LacI family OS=Escherichia coli (strain B / BL21-DE3) OX=469008 GN=ECBD_2908 PE=4 SV=1
1080	A0A140NCV6	dipZ	4	1	12	7	6	2.68611e-05	1.62407e-05	1.42323e-05		0.604615	0.529849	0.269906	0.398904	0.28044		Thiol:disulfide interchange protein DsbD OS=Escherichia coli (strain B / BL21-DE3) OX=469008 GN=dsbD PE=3 SV=1
1229	A0A140N8U7	ftsK	18	10	67	39	28	6.31413e-05	3.80948e-05	2.79627e-05		0.603326	0.442859	0.372647	0.31321	0.279243		Cell divisionFtsK/SpoIIIE OS=Escherichia coli (strain B / BL21-DE3) OX=469008 GN=ECBD_2705 PE=3 SV=1
186	A0A140NH17	hemE	7	6	31	18	38	0.000110752	6.66535e-05	0.000143865		0.601829	1.29898	0.590135	0.869266	0.277853		Uroporphyrinogen decarboxylase OS=Escherichia coli (strain B / BL21-DE3) OX=469008 GN=hemE PE=3 SV=1
1441	A0A140NC19	ybgI	7	6	50	29	15	0.000256014	0.000153906	8.13894e-05		0.60116	0.317909	0.426783	0.188941	0.277233		Uncharacterized protein OS=Escherichia coli (strain B / BL21-DE3) OX=469008 GN=ECBD_2951 PE=4 SV=1
1215	A0A140N8D8	hisC	9	6	38	22	16	0.000134997	8.10077e-05	6.02343e-05		0.600069	0.446189	0.173302	0.316542	0.276221		Histidinol-phosphate aminotransferase OS=Escherichia coli (strain B / BL21-DE3) OX=469008 GN=hisC PE=3 SV=1
944	A0A140N8C8	ygiM	7	8	19	11	11	0.000116648	6.9997e-05	7.15647e-05		0.600069	0.613509	0.638901	0.476919	0.276221		SH3 domain protein OS=Escherichia coli (strain B / BL21-DE3) OX=469008 GN=ECBD_0686 PE=4 SV=1
1107	A0A140NAM7	oppB	4	3	19	11	9	7.85278e-05	4.71222e-05	3.9418e-05		0.600069	0.501962	0.673578	0.371817	0.276221		Binding-protein-dependent transport systems inner membrane component OS=Escherichia coli (strain B / BL21-DE3) OX=469008 GN=ECBD_2378 PE=3 SV=1
1108	A0A140N9C3	glk	5	3	19	11	9	7.48583e-05	4.49202e-05	3.7576e-05		0.600069	0.501962	0.734989	0.371817	0.276221		Glucokinase OS=Escherichia coli (strain B / BL21-DE3) OX=469008 GN=glk PE=3 SV=1
1180	A0A140NHM8	sthA	14	12	168	97	74	0.000455947	0.00027286	0.000212823		0.598446	0.466772	0.385338	0.337074	0.274716		Soluble pyridine nucleotide transhydrogenase OS=Escherichia coli (strain B / BL21-DE3) OX=469008 GN=sthA PE=3 SV=1
1487	A0A140N534	gph	6	3	26	15	7	0.000130486	7.80269e-05	3.72281e-05		0.597971	0.285303	0.0709001	0.157965	0.274277		Phosphoglycolate phosphatase OS=Escherichia coli (strain B / BL21-DE3) OX=469008 GN=gph PE=3 SV=1
1318	A0A140NCH7	sdhD	2	1	26	15	1	0.000285935	0.000170981	1.1654e-05		0.597971	0.0407576	0.165865	0.00333178	0.274277		Succinate dehydrogenase hydrophobic membrane anchor subunit OS=Escherichia coli (strain B / BL21-DE3) OX=469008 GN=ECBD_2938 PE=4 SV=1
1319	A0A140NEF5	folD	7	2	47	27	2	0.000206394	0.000122892	9.30703e-06		0.595427	0.0450935	0.176407	0.00413861	0.271921		Bifunctional protein FolD OS=Escherichia coli (strain B / BL21-DE3) OX=469008 GN=folD PE=3 SV=1
734	A0A140N5H1	yhcB	7	6	75	43	53	0.000718586	0.00042702	0.000538116		0.594251	0.748853	0.57937	0.589867	0.270834		Uncharacterized protein OS=Escherichia coli (strain B / BL21-DE3) OX=469008 GN=ECBD_0514 PE=4 SV=1
954	A0A140N7U0	yraP	8	8	63	36	36	0.000417156	0.000247072	0.000252605		0.592276	0.605542	0.404055	0.469731	0.26901		Transport-associated OS=Escherichia coli (strain B / BL21-DE3) OX=469008 GN=ECBD_0590 PE=4 SV=1
1322	A0A140N720	iscX	1	1	7	4	6	0.000134136	7.94456e-05	0.000121837		0.592276	0.908313	0.281548	0.69912	0.26901		FeS assembly protein IscX OS=Escherichia coli (strain B / BL21-DE3) OX=469008 GN=ECBD_1160 PE=4 SV=1
1329	A0A140NAL3	hslJ	5	2	14	8	4	0.000126471	7.49059e-05	3.82918e-05		0.592276	0.302771	0.0869561	0.174422	0.26901		META domain-containing protein OS=Escherichia coli (strain B / BL21-DE3) OX=469008 GN=ECBD_2244 PE=4 SV=1
756	A0A140N6D7	bglA	13	6	42	24	29	0.000111358	6.59548e-05	8.14804e-05		0.592276	0.731696	0.396595	0.576556	0.26901		Glycoside hydrolase family 1 OS=Escherichia coli (strain B / BL21-DE3) OX=469008 GN=ECBD_0836 PE=3 SV=1
1205	A0A140N3K4	yicH	7	5	28	16	12	6.22354e-05	3.68605e-05	2.82646e-05		0.592276	0.454156	0.212212	0.324504	0.26901		AsmA family protein OS=Escherichia coli (strain B / BL21-DE3) OX=469008 GN=ECBD_0069 PE=4 SV=1
1330	A0A140NB95	btuE	2	1	7	4	1	4.83769e-05	2.86525e-05	7.32356e-06		0.592276	0.151385	0.0396405	0.0498937	0.26901		Thioredoxin/glutathione peroxidase BtuE OS=Escherichia coli (strain B / BL21-DE3) OX=469008 GN=btuE PE=3 SV=1
625	A0A140N8V3	rsmF	6	7	14	8	11	3.68107e-05	2.18021e-05	3.06493e-05		0.592276	0.83262	0.281548	0.650501	0.26901		Ribosomal RNA small subunit methyltransferase F OS=Escherichia coli (strain B / BL21-DE3) OX=469008 GN=rsmF PE=3 SV=1
1321	A0A140NCM1	metB	2	4	7	4	7	2.29352e-05	1.3584e-05	2.43044e-05		0.592276	1.0597	0.734989	0.779818	0.26901		O-succinylhomoserine (Thiol)-lyase OS=Escherichia coli (strain B / BL21-DE3) OX=469008 GN=ECBD_4084 PE=3 SV=1
1325	A0A140NDD4	sbcD	2	1	7	4	5	2.21324e-05	1.31085e-05	1.67527e-05		0.592276	0.756927	0.146064	0.596027	0.26901		Nuclease SbcCD subunit D OS=Escherichia coli (strain B / BL21-DE3) OX=469008 GN=sbcD PE=3 SV=1
1324	A0A140N9A6	ynjE	2	2	7	4	5	2.03517e-05	1.20538e-05	1.54047e-05		0.592276	0.756927	0.281548	0.596027	0.26901		Sulfurtransferase OS=Escherichia coli (strain B / BL21-DE3) OX=469008 GN=ECBD_1887 PE=4 SV=1
1577	A0A140N6Z1	manA	12	6	79	45	15	0.00025553	0.000150865	5.14148e-05		0.590402	0.201209	0.0250378	0.0853246	0.26728		Mannose-6-phosphate isomerase OS=Escherichia coli (strain B / BL21-DE3) OX=469008 GN=ECBD_2033 PE=3 SV=1
479	A0A140NF80	ybaB	7	5	232	132	204	0.00269186	0.00158745	0.00250829		0.589723	0.931804	0.52674	0.71305	0.266654		Nucleoid-associated protein YbaB OS=Escherichia coli (strain B / BL21-DE3) OX=469008 GN=ybaB PE=3 SV=1
1242	A0A140NDI4	serC	20	17	220	124	89	0.000768609	0.000449021	0.0003295		0.5842	0.428696	0.407366	0.299016	0.26157		Phosphoserine aminotransferase OS=Escherichia coli (strain B / BL21-DE3) OX=469008 GN=serC PE=3 SV=1
728	A0A140NFT4	carA	11	11	128	72	91	0.000423778	0.000247072	0.000319265		0.583022	0.753379	0.46752	0.593328	0.260488		Carbamoyl-phosphate synthase small chain OS=Escherichia coli (strain B / BL21-DE3) OX=469008 GN=carA PE=3 SV=1
1115	A0A140NC81	ydcL	7	6	32	18	15	0.000182301	0.000106285	9.05549e-05		0.583022	0.496734	0.410551	0.366691	0.260488		Uncharacterized lipoprotein YdcL OS=Escherichia coli (strain B / BL21-DE3) OX=469008 GN=ECBD_2209 PE=4 SV=1
1302	A0A140NEE1	yjtD	5	2	16	9	6	8.87517e-05	5.17442e-05	3.52687e-05		0.583022	0.397387	0.410551	0.267588	0.260488		tRNA (cytidine/uridine-2'-O-)-methyltransferase TrmJ OS=Escherichia coli (strain B / BL21-DE3) OX=469008 GN=trmJ PE=4 SV=1
1375	A0A140N510	pck	31	23	283	159	91	0.000662802	0.000385973	0.000225851		0.582335	0.340751	0.249509	0.21121	0.259857		Phosphoenolpyruvate carboxykinase (ATP) OS=Escherichia coli (strain B / BL21-DE3) OX=469008 GN=pckA PE=3 SV=1
1092	A0A140N8Y0	fumA	27	22	225	126	109	0.00051927	0.0003014	0.000266575		0.580431	0.513365	0.21921	0.382947	0.25811		Fumarate hydratase class I OS=Escherichia coli (strain B / BL21-DE3) OX=469008 GN=ECBD_2034 PE=3 SV=1
1397	A0A140N6V3	nemA	12	7	52	29	16	0.000180178	0.00010415	5.8749e-05		0.578039	0.326061	0.0709001	0.196843	0.255919		NADH:flavin oxidoreductase/NADH oxidase OS=Escherichia coli (strain B / BL21-DE3) OX=469008 GN=ECBD_1993 PE=4 SV=1
1122	A0A140N8R5	ygdH	18	17	90	50	42	0.000250714	0.000144367	0.000123984		0.575824	0.494526	0.393601	0.364522	0.253893		Uncharacterized protein OS=Escherichia coli (strain B / BL21-DE3) OX=469008 GN=ECBD_0934 PE=4 SV=1
1344	A0A140N708	yhhM	4	1	9	5	1	9.56504e-05	5.50778e-05	1.12623e-05		0.575824	0.117744	0.297078	0.0304499	0.253893		Putative receptor OS=Escherichia coli (strain B / BL21-DE3) OX=469008 GN=ECBD_0274 PE=4 SV=1
1343	A0A140N6P1	ppsR	5	4	18	10	4	8.21834e-05	4.73232e-05	1.93532e-05		0.575824	0.235488	0.189637	0.113356	0.253893		Phosphoenolpyruvate synthase regulatory protein OS=Escherichia coli (strain B / BL21-DE3) OX=469008 GN=ppsR PE=3 SV=1
1341	A0A140NFX5	dtd	3	3	9	5	5	7.84993e-05	4.52018e-05	4.62142e-05		0.575824	0.588721	0.189637	0.454378	0.253893		D-aminoacyl-tRNA deacylase OS=Escherichia coli (strain B / BL21-DE3) OX=469008 GN=dtd PE=3 SV=1
796	A0A140N495	nlpA	3	2	9	5	6	4.18471e-05	2.40966e-05	2.95635e-05		0.575824	0.706465	0.592822	0.556436	0.253893		Lipoprotein OS=Escherichia coli (strain B / BL21-DE3) OX=469008 GN=ECBD_0044 PE=3 SV=1
1463	A0A140N5B5	yqhD	9	6	45	25	13	0.000147059	8.46804e-05	4.502e-05		0.575824	0.306135	0.340392	0.177629	0.253893		Iron-containing alcohol dehydrogenase OS=Escherichia coli (strain B / BL21-DE3) OX=469008 GN=ECBD_0729 PE=4 SV=1
1570	A0A140NH97	basS	9	4	36	20	7	0.000124398	7.16313e-05	2.56325e-05		0.575824	0.206052	0.297078	0.0891257	0.253893		Histidine kinase OS=Escherichia coli (strain B / BL21-DE3) OX=469008 GN=ECBD_3919 PE=4 SV=1
1346	A0A140NC47	yjjX	3	1	9	5	3	6.57942e-05	3.78859e-05	2.32407e-05		0.575824	0.353233	0.404055	0.223524	0.253893		Inosine/xanthosine triphosphatase OS=Escherichia coli (strain B / BL21-DE3) OX=469008 GN=ECBD_3626 PE=3 SV=1
1349	A0A140NDB8	nlpE	3	1	9	5	1	4.82305e-05	2.77723e-05	5.67887e-06		0.575824	0.117744	0.189637	0.0304499	0.253893		Copper resistance lipoprotein NlpE OS=Escherichia coli (strain B / BL21-DE3) OX=469008 GN=ECBD_3426 PE=4 SV=1
1345	A0A140NCT5	panE	2	2	9	5	6	3.75657e-05	2.16312e-05	2.65389e-05		0.575824	0.706465	0.297078	0.556436	0.253893		2-dehydropantoate 2-reductase OS=Escherichia coli (strain B / BL21-DE3) OX=469008 GN=ECBD_3236 PE=3 SV=1
1651	A0A140NAF3	efeO	14	6	101	56	13	0.000340629	0.000195754	4.64607e-05		0.574684	0.136397	0.0428352	0.0407326	0.252851		Uncharacterized protein OS=Escherichia coli (strain B / BL21-DE3) OX=469008 GN=ECBD_2576 PE=4 SV=1
1351	A0A140NDE2	yaiE	2	2	29	16	2	0.000390177	0.000223124	2.85152e-05		0.571853	0.0730826	0.0814264	0.0114894	0.250268		Pyrimidine/purine nucleoside phosphorylase OS=Escherichia coli (strain B / BL21-DE3) OX=469008 GN=ppnP PE=3 SV=1
1373	A0A140N9A7	csrA	5	5	80	44	26	0.00165864	0.000945533	0.000571238		0.570066	0.344402	0.136643	0.214803	0.248641		Translational regulator CsrA OS=Escherichia coli (strain B / BL21-DE3) OX=469008 GN=csrA PE=3 SV=1
1569	A0A140N8L5	yggX	9	5	51	28	10	0.000708794	0.000403339	0.000147276		0.56905	0.207784	0.0183392	0.0904981	0.247716		Probable Fe(2+)-trafficking protein OS=Escherichia coli (strain B / BL21-DE3) OX=469008 GN=yggX PE=3 SV=1
1223	A0A140N6W3	ptsP	12	8	31	17	13	5.24145e-05	2.97921e-05	2.32925e-05		0.568394	0.44439	0.335524	0.314742	0.24712		PTSINtr with GAF domain, PtsP OS=Escherichia coli (strain B / BL21-DE3) OX=469008 GN=ECBD_0896 PE=3 SV=1
1514	A0A140N3P8	arcB	11	6	31	17	8	5.03934e-05	2.86433e-05	1.37811e-05		0.568394	0.27347	0.179591	0.147029	0.24712		Aerobic respiration control sensor protein OS=Escherichia coli (strain B / BL21-DE3) OX=469008 GN=ECBD_0532 PE=4 SV=1
1103	A0A140N735	aroE	6	5	42	23	20	0.000195286	0.000110844	9.8545e-05		0.567598	0.504618	0.146064	0.374416	0.246396		Shikimate dehydrogenase (NADP(+)) OS=Escherichia coli (strain B / BL21-DE3) OX=469008 GN=aroE PE=3 SV=1
1193	A0A140NFP6	ppiC	7	4	53	29	23	0.000720749	0.00040876	0.00033145		0.567133	0.459869	0.231655	0.330202	0.245973		Peptidylprolyl isomerase OS=Escherichia coli (strain B / BL21-DE3) OX=469008 GN=ECBD_4264 PE=4 SV=1
1374	A0A140ND02	oppA	27	24	293	160	95	0.000664087	0.000375872	0.000228172		0.565998	0.343588	0.171646	0.214001	0.244943		Extracellular solute-binding protein family 5 OS=Escherichia coli (strain B / BL21-DE3) OX=469008 GN=ECBD_2379 PE=4 SV=1
935	A0A140NFL5	yifL	2	2	22	12	13	0.000415278	0.00023478	0.000260041		0.565355	0.626185	0.218434	0.48824	0.244359		Uncharacterized protein OS=Escherichia coli (strain B / BL21-DE3) OX=469008 GN=ECBD_4233 PE=4 SV=1
1563	A0A140N8Q2	aroD	8	5	33	18	7	0.000165617	9.36323e-05	3.72281e-05		0.565355	0.224784	0.0445721	0.104332	0.244359		3-dehydroquinate dehydratase OS=Escherichia coli (strain B / BL21-DE3) OX=469008 GN=aroD PE=3 SV=1
1362	A0A140N6Y2	evgA	2	2	11	6	3	6.81952e-05	3.85545e-05	1.9709e-05		0.565355	0.289009	0.477558	0.161427	0.244359		Two component transcriptional regulator, LuxR family OS=Escherichia coli (strain B / BL21-DE3) OX=469008 GN=ECBD_1303 PE=4 SV=1
1006	A0A140NG64	dapF	3	3	11	6	6	5.07731e-05	2.87048e-05	2.93477e-05		0.565355	0.578017	0.394554	0.444487	0.244359		Diaminopimelate epimerase OS=Escherichia coli (strain B / BL21-DE3) OX=469008 GN=dapF PE=3 SV=1
1149	A0A140N9E8	ycbZ	8	7	22	12	10	4.74806e-05	2.68434e-05	2.28705e-05		0.565355	0.481681	0.589032	0.351859	0.244359		Endopeptidase La OS=Escherichia coli (strain B / BL21-DE3) OX=469008 GN=ECBD_2640 PE=3 SV=1
1040	A0A140NAQ0	mrp	10	10	92	50	48	0.000315321	0.000177622	0.000174337		0.563306	0.552886	0.276991	0.420912	0.242503		Iron-sulfur cluster carrier protein OS=Escherichia coli (strain B / BL21-DE3) OX=469008 GN=ECBD_1545 PE=3 SV=1
1619	A0A140NGB9	argI	7	4	35	19	6	0.00013253	7.45695e-05	2.40757e-05		0.562663	0.181663	0.281548	0.0705883	0.24192		Ornithine carbamoyltransferase OS=Escherichia coli (strain B / BL21-DE3) OX=469008 GN=argI PE=3 SV=1
1135	A0A140N8M5	oppD	8	7	35	19	16	0.00013135	7.39056e-05	6.36303e-05		0.562663	0.484433	0.418858	0.354579	0.24192		Oligopeptide/dipeptide ABC transporter, ATPase subunit OS=Escherichia coli (strain B / BL21-DE3) OX=469008 GN=ECBD_2376 PE=3 SV=1
1523	A0A140SS57	purD	9	6	83	45	21	0.000244688	0.000137502	6.56048e-05		0.561949	0.268116	0.088918	0.142144	0.241274		Phosphoribosylamine--glycine ligase OS=Escherichia coli (strain B / BL21-DE3) OX=469008 GN=purD PE=3 SV=1
1235	A0A140NFX2	ytjC	8	5	24	13	10	0.000141177	7.92609e-05	6.23355e-05		0.561429	0.441541	0.151367	0.311891	0.240804		Probable phosphoglycerate mutase GpmB OS=Escherichia coli (strain B / BL21-DE3) OX=469008 GN=gpmB PE=3 SV=1
1160	A0A140NGN0	aspA	17	16	228	123	102	0.000603251	0.000337311	0.000285987		0.559156	0.474075	0.32135	0.344328	0.23875		Aspartate ammonia-lyase OS=Escherichia coli (strain B / BL21-DE3) OX=469008 GN=ECBD_3892 PE=3 SV=1
700	A0A140NES1	xseB	4	4	26	14	19	0.000411031	0.000229399	0.0003183		0.558107	0.774395	0.556585	0.609123	0.237804		Exodeoxyribonuclease 7 small subunit OS=Escherichia coli (strain B / BL21-DE3) OX=469008 GN=xseB PE=3 SV=1
1574	A0A140NCM6	cysQ	4	3	26	14	5	0.000133669	7.46014e-05	2.72401e-05		0.558107	0.203788	0.0997359	0.0873418	0.237804		3'(2'),5'-bisphosphate nucleotidase CysQ OS=Escherichia coli (strain B / BL21-DE3) OX=469008 GN=cysQ PE=3 SV=1
1371	A0A140NB21	yeaD	5	3	26	14	7	0.000111845	6.24216e-05	3.19098e-05		0.558107	0.285303	0.0459415	0.157965	0.237804		Putative glucose-6-phosphate 1-epimerase OS=Escherichia coli (strain B / BL21-DE3) OX=469008 GN=ECBD_1864 PE=3 SV=1
1372	A0A140NA93	yegH	4	3	13	7	3	3.11978e-05	1.74117e-05	7.62929e-06		0.558107	0.244546	0.313782	0.121163	0.237804		Integral membrane protein TerC OS=Escherichia coli (strain B / BL21-DE3) OX=469008 GN=ECBD_1592 PE=4 SV=1
1334	A0A140NAD8	rihA	5	4	28	15	10	0.000113865	6.32244e-05	4.30936e-05		0.555259	0.378464	0.281548	0.248634	0.235239		Pyrimidine-specific ribonucleoside hydrolase RihA OS=Escherichia coli (strain B / BL21-DE3) OX=469008 GN=rihA PE=3 SV=1
1019	A0A140NFR7	lpxC	9	8	43	23	23	0.000178304	9.88512e-05	0.000101065		0.554398	0.566815	0.406476	0.434038	0.234464		UDP-3-O-acyl-N-acetylglucosamine deacetylase OS=Escherichia coli (strain B / BL21-DE3) OX=469008 GN=lpxC PE=3 SV=1
960	A0A140N8B7	csdA	7	7	30	16	17	9.46168e-05	5.23033e-05	5.6817e-05		0.552791	0.600496	0.286207	0.465151	0.233021		Aminotransferase class V OS=Escherichia coli (strain B / BL21-DE3) OX=469008 GN=ECBD_0912 PE=3 SV=1
1376	A0A140NFQ1	djlA	4	3	15	8	11	7.00025e-05	3.86968e-05	5.43998e-05		0.552791	0.777112	0.0763837	0.611131	0.233021		Co-chaperone protein DjlA OS=Escherichia coli (strain B / BL21-DE3) OX=469008 GN=djlA PE=3 SV=1
999	A0A140NFA9	hupB	8	7	235	125	129	0.0033023	0.00182063	0.00192097		0.551321	0.581707	0.425606	0.447907	0.231702		Histone family protein DNA-binding protein OS=Escherichia coli (strain B / BL21-DE3) OX=469008 GN=ECBD_3215 PE=3 SV=1
805	A0A140NDK4	cydD	10	11	47	25	31	0.000101091	5.57335e-05	7.06574e-05		0.551321	0.69895	0.515801	0.550319	0.231702		ABC transporter, CydDC cysteine exporter (CydDC-E) family, permease/ATP-binding protein CydD OS=Escherichia coli (strain B / BL21-DE3) OX=469008 GN=ECBD_2708 PE=4 SV=1
1381	A0A140N9N9	osmE	3	1	17	9	4	0.000191965	0.000105336	4.78647e-05		0.548727	0.249341	0.322606	0.125357	0.229378		SmpA/OmlA domain protein OS=Escherichia coli (strain B / BL21-DE3) OX=469008 GN=ECBD_1906 PE=4 SV=1
1382	A0A140NGB3	lptG	4	2	17	9	2	5.97225e-05	3.27713e-05	7.44562e-06		0.548727	0.12467	0.153564	0.0341171	0.229378		Permease YjgP/YjgQ family protein OS=Escherichia coli (strain B / BL21-DE3) OX=469008 GN=ECBD_3774 PE=4 SV=1
937	A0A140N836	aroC	4	4	17	9	10	5.9557e-05	3.26805e-05	3.7125e-05		0.548727	0.623352	0.265116	0.485722	0.229378		Chorismate synthase OS=Escherichia coli (strain B / BL21-DE3) OX=469008 GN=aroC PE=3 SV=1
1014	A0A140NFP9	acnB	61	59	1179	619	635	0.00172381	0.000938055	0.000983855		0.544176	0.570745	0.412775	0.437714	0.225316		Aconitate hydratase B OS=Escherichia coli (strain B / BL21-DE3) OX=469008 GN=ECBD_3501 PE=3 SV=1
996	A0A140NA86	ycfM	6	4	40	21	22	0.000237504	0.000129239	0.000138426		0.544154	0.582834	0.489462	0.448949	0.225297		Penicillin-binding protein activator LpoB OS=Escherichia coli (strain B / BL21-DE3) OX=469008 GN=lpoB PE=3 SV=1
657	A0A140N3G6	ibpB	5	5	21	11	16	0.000187035	0.000101545	0.00015101		0.54292	0.807389	0.616072	0.633	0.224199		Small heat shock protein IbpB OS=Escherichia coli (strain B / BL21-DE3) OX=469008 GN=ibpB PE=3 SV=1
1472	A0A140NDS7	msrA	3	2	21	11	6	0.000125278	6.80159e-05	3.79305e-05		0.54292	0.302771	0.1056	0.174422	0.224199		Peptide methionine sulfoxide reductase MsrA OS=Escherichia coli (strain B / BL21-DE3) OX=469008 GN=msrA PE=3 SV=1
1608	A0A140N5P6	yrdA	8	6	44	23	8	0.000302431	0.000163857	5.82701e-05		0.541798	0.192672	0.0361063	0.0787669	0.223201		Putative transferase OS=Escherichia coli (strain B / BL21-DE3) OX=469008 GN=ECBD_0472 PE=4 SV=1
1552	A0A140NFD1	yihW	6	2	23	12	5	0.00011145	6.02691e-05	2.56746e-05		0.540774	0.230369	0.20333	0.109012	0.222292		Transcriptional regulator, DeoR family OS=Escherichia coli (strain B / BL21-DE3) OX=469008 GN=ECBD_4143 PE=4 SV=1
1236	A0A140N3T1	pepP	9	10	75	39	31	0.000215087	0.000115926	9.42099e-05		0.538971	0.438009	0.279685	0.308353	0.220693		Peptidase M24 OS=Escherichia coli (strain B / BL21-DE3) OX=469008 GN=ECBD_0829 PE=4 SV=1
1541	A0A140N9M5	ucpA	4	4	25	13	6	0.00012022	6.4795e-05	3.05752e-05		0.538971	0.254328	0.253638	0.12976	0.220693		Short-chain dehydrogenase/reductase SDR OS=Escherichia coli (strain B / BL21-DE3) OX=469008 GN=ECBD_1255 PE=4 SV=1
808	A0A140NBM6	mgsA	2	2	29	15	19	0.000241294	0.00012936	0.000167527		0.536112	0.694285	0.367722	0.546494	0.218163		Methylglyoxal synthase OS=Escherichia coli (strain B / BL21-DE3) OX=469008 GN=mgsA PE=3 SV=1
1392	A0A140N831	bglX	25	14	122	63	38	0.000201693	0.000107953	6.65726e-05		0.535233	0.33007	0.125694	0.200749	0.217386		Glycoside hydrolase family 3 domain protein OS=Escherichia coli (strain B / BL21-DE3) OX=469008 GN=ECBD_1526 PE=3 SV=1
1206	A0A140N9P2	rlpA	6	7	35	18	15	0.000122279	6.51805e-05	5.55337e-05		0.533049	0.454156	0.097998	0.324504	0.21546		Endolytic peptidoglycan transglycosylase RlpA OS=Escherichia coli (strain B / BL21-DE3) OX=469008 GN=rlpA PE=3 SV=1
1316	A0A140NBG7	fumC	12	6	74	38	27	0.000200404	0.000106665	7.74855e-05		0.532248	0.386647	0.258909	0.256822	0.214756		Fumarate hydratase class II OS=Escherichia coli (strain B / BL21-DE3) OX=469008 GN=fumC PE=3 SV=1
1133	A0A140NBF4	sucC	24	24	684	351	313	0.00222954	0.00118585	0.00108115		0.53188	0.48492	0.345488	0.355059	0.214431		Succinate--CoA ligase [ADP-forming] subunit beta OS=Escherichia coli (strain B / BL21-DE3) OX=469008 GN=sucC PE=3 SV=1
1364	A0A140NE87	ssb	2	4	41	21	14	0.00029131	0.000154651	0.00010541		0.530882	0.361848	0.453891	0.23207	0.213554		Single-stranded DNA-binding protein OS=Escherichia coli (strain B / BL21-DE3) OX=469008 GN=ECBD_3973 PE=3 SV=1
1189	A0A140N9U2	yciK	10	9	55	28	24	0.000276028	0.00014565	0.000127639		0.527664	0.462414	0.271387	0.332737	0.210732		Short-chain dehydrogenase/reductase SDR OS=Escherichia coli (strain B / BL21-DE3) OX=469008 GN=ECBD_2351 PE=4 SV=1
1111	A0A140SSC0	trxA	7	6	214	108	101	0.00248301	0.00129883	0.00124185		0.523085	0.500138	0.149627	0.37003	0.206732		Thioredoxin OS=Escherichia coli (strain B / BL21-DE3) OX=469008 GN=ECBD_4259 PE=3 SV=1
1398	A0A140NFF9	yihD	12	8	62	31	19	0.000881035	0.000456589	0.000286113		0.518242	0.324746	0.0322911	0.195565	0.202525		Uncharacterized protein OS=Escherichia coli (strain B / BL21-DE3) OX=469008 GN=ECBD_4172 PE=4 SV=1
1250	A0A140NHF7	lexA	6	4	30	15	12	0.000187828	9.73405e-05	7.96166e-05		0.518242	0.423879	0.253638	0.294183	0.202525		LexA repressor OS=Escherichia coli (strain B / BL21-DE3) OX=469008 GN=lexA PE=3 SV=1
1438	A0A140NES2	queC	2	1	24	12	3	0.000131399	6.80962e-05	1.74054e-05		0.518242	0.132462	0.0537784	0.0384573	0.202525		7-cyano-7-deazaguanine synthase OS=Escherichia coli (strain B / BL21-DE3) OX=469008 GN=queC PE=3 SV=1
997	A0A140N785	nanR	4	5	20	10	11	9.61758e-05	4.98423e-05	5.60545e-05		0.518242	0.582834	0.609201	0.448949	0.202525		HTH-type transcriptional repressor NanR OS=Escherichia coli (strain B / BL21-DE3) OX=469008 GN=nanR PE=3 SV=1
83	A0A140N523	arsC	3	2	10	5	17	8.96958e-05	4.64841e-05	0.000161586		0.518242	1.80149	0.445075	0.959512	0.202525		Arsenate reductase OS=Escherichia coli (strain B / BL21-DE3) OX=469008 GN=ECBD_0237 PE=3 SV=1
636	A0A140N936	manY	1	1	18	9	14	8.5582e-05	4.43522e-05	7.05375e-05		0.518242	0.82421	0.351139	0.64474	0.202525		PTS system, mannose/fructose/sorbose family, IIC subunit OS=Escherichia coli (strain B / BL21-DE3) OX=469008 GN=ECBD_1823 PE=4 SV=1
1431	A0A140NGX6	ubiC	4	2	10	5	3	7.66492e-05	3.97228e-05	2.43675e-05		0.518242	0.317909	0.158867	0.188941	0.202525		Chorismate pyruvate-lyase OS=Escherichia coli (strain B / BL21-DE3) OX=469008 GN=ubiC PE=3 SV=1
1412	A0A140N6Q0	greB	4	2	8	4	4	6.4036e-05	3.31861e-05	3.39294e-05		0.518242	0.529849	0.46752	0.398904	0.202525		Transcription elongation factor GreB OS=Escherichia coli (strain B / BL21-DE3) OX=469008 GN=greB PE=3 SV=1
348	A0A140NGB8	apaH	5	3	14	7	14	6.32356e-05	3.27713e-05	6.70106e-05		0.518242	1.0597	0.351139	0.779818	0.202525		Bis(5'-nucleosyl)-tetraphosphatase, symmetrical OS=Escherichia coli (strain B / BL21-DE3) OX=469008 GN=apaH PE=3 SV=1
1435	A0A140N2X4	prmA	3	2	12	6	2	5.17971e-05	2.68434e-05	9.14821e-06		0.518242	0.176616	0.0537784	0.0669504	0.202525		Ribosomal protein L11 methyltransferase OS=Escherichia coli (strain B / BL21-DE3) OX=469008 GN=prmA PE=3 SV=1
797	A0A140NFL7	mraY	2	2	12	6	8	4.2157e-05	2.18475e-05	2.97825e-05		0.518242	0.706465	0.429851	0.556436	0.202525		Phospho-N-acetylmuramoyl-pentapeptide-transferase OS=Escherichia coli (strain B / BL21-DE3) OX=469008 GN=mraY PE=3 SV=1
1432	A0A140N8D7	thiD	2	2	8	4	2	3.80364e-05	1.97121e-05	1.00768e-05		0.518242	0.264925	0.734989	0.139251	0.202525		Phosphomethylpyrimidine kinase OS=Escherichia coli (strain B / BL21-DE3) OX=469008 GN=ECBD_1554 PE=4 SV=1
1433	A0A140NC73	ybaO	1	1	4	2	1	3.32819e-05	1.72481e-05	8.81719e-06		0.518242	0.264925	0.115353	0.139251	0.202525		Transcriptional regulator, AsnC family OS=Escherichia coli (strain B / BL21-DE3) OX=469008 GN=ECBD_3208 PE=4 SV=1
1436	A0A140N694	bacA	1	1	6	3	1	2.77959e-05	1.4405e-05	4.9092e-06		0.518242	0.176616	0.0537784	0.0669504	0.202525		Undecaprenyl-diphosphatase OS=Escherichia coli (strain B / BL21-DE3) OX=469008 GN=uppP PE=3 SV=1
1429	A0A140NDF9	tauD	2	1	6	3	2	2.68137e-05	1.3896e-05	9.47146e-06		0.518242	0.353233	0.351139	0.223524	0.202525		Taurine dioxygenase OS=Escherichia coli (strain B / BL21-DE3) OX=469008 GN=ECBD_3293 PE=4 SV=1
1416	A0A140N5P9	yfdX	1	1	4	2	2	2.40897e-05	1.24843e-05	1.27639e-05		0.518242	0.529849	0.843025	0.398904	0.202525		Uncharacterized protein OS=Escherichia coli (strain B / BL21-DE3) OX=469008 GN=ECBD_1297 PE=4 SV=1
1439	A0A140N8S6	rlmD	2	1	8	4	1	2.33665e-05	1.21095e-05	3.09518e-06		0.518242	0.132462	0.571668	0.0384573	0.202525		23S rRNA (uracil(1939)-C(5))-methyltransferase RlmD OS=Escherichia coli (strain B / BL21-DE3) OX=469008 GN=rlmD PE=3 SV=1
1413	A0A140N5P1	ebgR	1	2	6	3	3	2.32057e-05	1.20262e-05	1.22955e-05		0.518242	0.529849	0.0537784	0.398904	0.202525		Transcriptional regulator, LacI family OS=Escherichia coli (strain B / BL21-DE3) OX=469008 GN=ECBD_0667 PE=4 SV=1
1428	A0A140N852	yncB	2	1	6	3	2	2.1995e-05	1.13987e-05	7.76935e-06		0.518242	0.353233	0.351139	0.223524	0.202525		Alcohol dehydrogenase zinc-binding domain protein OS=Escherichia coli (strain B / BL21-DE3) OX=469008 GN=ECBD_2190 PE=4 SV=1
1437	A0A140N6I3	ybl160	3	1	6	3	1	1.92596e-05	9.98111e-06	3.40155e-06		0.518242	0.176616	0.189637	0.0669504	0.202525		Integrase family protein OS=Escherichia coli (strain B / BL21-DE3) OX=469008 GN=ECBD_0066 PE=3 SV=1
1401	A0A140NBA6	plsX	2	5	4	2	6	1.46209e-05	7.57718e-06	2.32407e-05		0.518242	1.58955	0.949453	0.932926	0.202525		Phosphate acyltransferase OS=Escherichia coli (strain B / BL21-DE3) OX=469008 GN=plsX PE=3 SV=1
1434	A0A140N820	rcsC	4	1	10	5	2	1.33268e-05	6.90649e-06	2.82447e-06		0.518242	0.21194	0.351139	0.0938202	0.202525		Sensor histidine kinase RcsC OS=Escherichia coli (strain B / BL21-DE3) OX=469008 GN=rcsC PE=3 SV=1
1422	A0A140NBI7	uidR	1	1	2	1	1	1.31741e-05	6.82736e-06	6.98027e-06		0.518242	0.529849	0.909875	0.398904	0.202525		Transcriptional regulator, TetR family OS=Escherichia coli (strain B / BL21-DE3) OX=469008 GN=ECBD_2027 PE=4 SV=1
1406	A0A140NDN2	ybhF	2	2	6	3	5	1.31285e-05	6.80373e-06	1.15935e-05		0.518242	0.883082	0.734989	0.683554	0.202525		ABC transporter related OS=Escherichia coli (strain B / BL21-DE3) OX=469008 GN=ECBD_2829 PE=4 SV=1
1403	A0A140N6E9	yeaY	1	2	2	1	3	1.31058e-05	6.79198e-06	2.08323e-05		0.518242	1.58955	0.351139	0.932926	0.202525		Outer membrane lipoprotein, Slp family OS=Escherichia coli (strain B / BL21-DE3) OX=469008 GN=ECBD_1836 PE=4 SV=1
1408	A0A140N6K7	wyz	2	2	4	2	3	1.29382e-05	6.70513e-06	1.0283e-05		0.518242	0.794774	0.571668	0.624003	0.202525		Uncharacterized protein OS=Escherichia coli (strain B / BL21-DE3) OX=469008 GN=ECBD_1623 PE=4 SV=1
1405	A0A140NEL6	ybgJ	1	1	2	1	2	1.16029e-05	6.01309e-06	1.22955e-05		0.518242	1.0597	0.351139	0.779818	0.202525		Allophanate hydrolase subunit 1 OS=Escherichia coli (strain B / BL21-DE3) OX=469008 GN=ECBD_2950 PE=4 SV=1
1418	A0A140NC59	glnP	1	1	2	1	1	1.15499e-05	5.98563e-06	6.11969e-06		0.518242	0.529849	0.734989	0.398904	0.202525		Polar amino acid ABC transporter, inner membrane subunit OS=Escherichia coli (strain B / BL21-DE3) OX=469008 GN=ECBD_2813 PE=3 SV=1
1399	C6EH62	nlpI	1	2	2	1	4	8.60348e-06	4.45868e-06	1.82342e-05		0.518242	2.1194	0.997734	0.981423	0.202525		Lipoprotein NlpI OS=Escherichia coli (strain B / BL21-DE3) OX=469008 GN=nlpI PE=3 SV=1
1425	A0A140NAN8	rssA	1	1	2	1	1	8.05549e-06	4.17469e-06	4.26819e-06		0.518242	0.529849	0.734989	0.398904	0.202525		Patatin OS=Escherichia coli (strain B / BL21-DE3) OX=469008 GN=ECBD_2388 PE=4 SV=1
1409	A0A140N8J1	topB	2	2	4	2	3	7.74708e-06	4.01486e-06	6.15718e-06		0.518242	0.794774	0.843025	0.624003	0.202525		DNA topoisomerase 3 OS=Escherichia coli (strain B / BL21-DE3) OX=469008 GN=topB PE=3 SV=1
1420	A0A140N5V9	yghZ	1	1	2	1	1	7.31047e-06	3.78859e-06	3.87345e-06		0.518242	0.529849	0.351139	0.398904	0.202525		Aldo/keto reductase OS=Escherichia coli (strain B / BL21-DE3) OX=469008 GN=ECBD_0737 PE=4 SV=1
1426	A0A140NG33	mcrC	1	1	2	1	1	7.26846e-06	3.76682e-06	3.85118e-06		0.518242	0.529849	0.734989	0.398904	0.202525		5-methylcytosine-specific restriction enzyme McrBC, subunit McrC OS=Escherichia coli (strain B / BL21-DE3) OX=469008 GN=ECBD_3687 PE=4 SV=1
1421	A0A140NAD9	sbmA	1	1	2	1	1	6.23011e-06	3.2287e-06	3.30102e-06		0.518242	0.529849	0.734989	0.398904	0.202525		SbmABacA family protein OS=Escherichia coli (strain B / BL21-DE3) OX=469008 GN=ECBD_3287 PE=4 SV=1
1415	A0A140NC21	mngB	2	2	4	2	2	5.76835e-06	2.9894e-06	3.05636e-06		0.518242	0.529849	0.351139	0.398904	0.202525		Glycoside hydrolase family 38 OS=Escherichia coli (strain B / BL21-DE3) OX=469008 GN=ECBD_2929 PE=4 SV=1
1402	A0A140NAL4	pheP	1	1	2	1	3	5.38175e-06	2.78905e-06	8.55455e-06		0.518242	1.58955	0.991896	0.932926	0.202525		Amino acid permease-associated region OS=Escherichia coli (strain B / BL21-DE3) OX=469008 GN=ECBD_3086 PE=4 SV=1
1419	A0A140N768	yfhK	1	1	2	1	1	5.3251e-06	2.75969e-06	2.8215e-06		0.518242	0.529849	0.909875	0.398904	0.202525		Histidine kinase OS=Escherichia coli (strain B / BL21-DE3) OX=469008 GN=ECBD_1128 PE=4 SV=1
1423	A0A140NBK1	torS	1	1	2	1	1	2.8136e-06	1.45812e-06	1.49078e-06		0.518242	0.529849	0.351139	0.398904	0.202525		Histidine kinase OS=Escherichia coli (strain B / BL21-DE3) OX=469008 GN=ECBD_2601 PE=4 SV=1
1424	A0A140N3V5	ygfK	1	1	2	1	1	2.45099e-06	1.27021e-06	1.29866e-06		0.518242	0.529849	0.351139	0.398904	0.202525		Selenate reductase YgfK OS=Escherichia coli (strain B / BL21-DE3) OX=469008 GN=ECBD_0859 PE=4 SV=1
1414	A0A140NAG4	yeeJ	2	2	4	2	2	2.1454e-06	1.11183e-06	1.13674e-06		0.518242	0.529849	0.115353	0.398904	0.202525		Ig domain protein group 1 domain protein OS=Escherichia coli (strain B / BL21-DE3) OX=469008 GN=ECBD_1667 PE=4 SV=1
1417	A0A140NEF1	ytfN	1	1	2	1	1	2.00907e-06	1.04119e-06	1.06451e-06		0.518242	0.529849	0.909875	0.398904	0.202525		Uncharacterized protein OS=Escherichia coli (strain B / BL21-DE3) OX=469008 GN=ECBD_3809 PE=4 SV=1
1449	A0A140N9N6	fdx	5	3	22	11	8	0.000250664	0.000129904	9.65919e-05		0.518242	0.385345	0.0636735	0.255518	0.202525		Ferredoxin, 2Fe-2S type, ISC system OS=Escherichia coli (strain B / BL21-DE3) OX=469008 GN=ECBD_1159 PE=4 SV=1
538	A0A140N5H3	yhfA	3	3	14	7	12	0.000132134	6.84774e-05	0.000120019		0.518242	0.908313	0.351139	0.69912	0.202525		OsmC family protein OS=Escherichia coli (strain B / BL21-DE3) OX=469008 GN=ECBD_0392 PE=4 SV=1
1452	A0A140NHK8	hemD	2	1	16	8	2	8.22576e-05	4.26294e-05	1.0896e-05		0.518242	0.132462	0.115353	0.0384573	0.202525		Uroporphyrinogen-III synthase OS=Escherichia coli (strain B / BL21-DE3) OX=469008 GN=ECBD_4238 PE=3 SV=1
1450	A0A140N9K9	ybl80	1	1	6	3	1	5.62094e-05	2.91301e-05	9.9275e-06		0.518242	0.176616	0.351139	0.0669504	0.202525		Transcriptional regulator, XRE family OS=Escherichia coli (strain B / BL21-DE3) OX=469008 GN=ECBD_2075 PE=4 SV=1
1261	A0A140NFV5	lptD	11	9	28	14	11	4.51683e-05	2.34081e-05	1.8804e-05		0.518242	0.41631	0.451537	0.286584	0.202525		LPS-assembly protein LptD OS=Escherichia coli (strain B / BL21-DE3) OX=469008 GN=lptD PE=3 SV=1
1207	A0A140N5X5	dnaG	5	4	14	7	6	3.0475e-05	1.57934e-05	1.38404e-05		0.518242	0.454156	0.543376	0.324504	0.202525		DNA primase OS=Escherichia coli (strain B / BL21-DE3) OX=469008 GN=dnaG PE=3 SV=1
1445	A0A140N7M4	yegU	2	2	6	3	3	2.27194e-05	1.17741e-05	1.20378e-05		0.518242	0.529849	0.734989	0.398904	0.202525		ADP-ribosylation/Crystallin J1 OS=Escherichia coli (strain B / BL21-DE3) OX=469008 GN=ECBD_1558 PE=4 SV=1
1451	A0A140N6M9	glgP	6	2	14	7	2	2.17251e-05	1.12589e-05	3.28886e-06		0.518242	0.151385	0.418858	0.0498937	0.202525		Alpha-1,4 glucan phosphorylase OS=Escherichia coli (strain B / BL21-DE3) OX=469008 GN=ECBD_0314 PE=3 SV=1
1443	A0A140N6E0	yoaE	2	2	8	4	4	1.95322e-05	1.01224e-05	1.03491e-05		0.518242	0.529849	0.351139	0.398904	0.202525		Integral membrane protein TerC OS=Escherichia coli (strain B / BL21-DE3) OX=469008 GN=ECBD_1826 PE=4 SV=1
1442	A0A140NHI6	aceK	1	1	8	4	4	1.75047e-05	9.07164e-06	9.27483e-06		0.518242	0.529849	0.115353	0.398904	0.202525		Isocitrate dehydrogenase kinase/phosphatase OS=Escherichia coli (strain B / BL21-DE3) OX=469008 GN=aceK PE=3 SV=1
1446	A0A140N615	yibQ	2	2	4	2	2	1.58584e-05	8.21851e-06	8.40258e-06		0.518242	0.529849	0.351139	0.398904	0.202525		Uncharacterized protein OS=Escherichia coli (strain B / BL21-DE3) OX=469008 GN=ECBD_0111 PE=4 SV=1
1444	A0A140NCM7	ushA	1	1	6	3	3	1.37969e-05	7.1501e-06	7.31025e-06		0.518242	0.529849	0.0537784	0.398904	0.202525		5'-Nucleotidase domain protein OS=Escherichia coli (strain B / BL21-DE3) OX=469008 GN=ECBD_3176 PE=3 SV=1
1440	A0A140ND95	yieG	1	1	4	2	4	1.13682e-05	5.89147e-06	1.20469e-05		0.518242	1.0597	0.351139	0.779818	0.202525		Xanthine/uracil/vitamin C permease OS=Escherichia coli (strain B / BL21-DE3) OX=469008 GN=ECBD_4318 PE=4 SV=1
1266	A0A140N7C6	nadE	14	11	141	70	55	0.000648452	0.000333672	0.000268042		0.514566	0.413357	0.230233	0.28362	0.199349		NH(3)-dependent NAD(+) synthetase OS=Escherichia coli (strain B / BL21-DE3) OX=469008 GN=nadE PE=3 SV=1
1042	A0A140SSC5	atpC	4	4	71	35	37	0.000646004	0.000330071	0.000356747		0.510943	0.552237	0.289423	0.420297	0.196232		ATP synthase epsilon chain OS=Escherichia coli (strain B / BL21-DE3) OX=469008 GN=atpC PE=3 SV=1
1258	A0A140NCK8	acnA	15	12	71	35	28	0.000100779	5.14925e-05	4.21167e-05		0.510943	0.417909	0.316953	0.28819	0.196232		Aconitate hydratase OS=Escherichia coli (strain B / BL21-DE3) OX=469008 GN=ECBD_2343 PE=3 SV=1
1496	A0A140SS84	argE	7	5	45	22	12	0.000148595	7.5297e-05	4.1991e-05		0.506725	0.282586	0.36184	0.155438	0.192622		Acetylornithine deacetylase OS=Escherichia coli (strain B / BL21-DE3) OX=469008 GN=argE PE=3 SV=1
1457	A0A140NCW8	cusA	13	1	37	18	2	4.46937e-05	2.25361e-05	2.5601e-06		0.504235	0.057281	0.156425	0.00688692	0.1905		Heavy metal efflux pump, CzcA family OS=Escherichia coli (strain B / BL21-DE3) OX=469008 GN=ECBD_3087 PE=3 SV=1
1564	A0A140NEY9	dgkA	3	3	33	16	7	0.000342094	0.000171915	7.68974e-05		0.502538	0.224784	0.085323	0.104332	0.189057		Diacylglycerol kinase OS=Escherichia coli (strain B / BL21-DE3) OX=469008 GN=ECBD_3991 PE=3 SV=1
1093	A0A140NE69	leuC	5	4	31	15	15	8.41332e-05	4.21948e-05	4.31399e-05		0.501524	0.512757	0.21001	0.382355	0.188198		3-isopropylmalate dehydratase large subunit OS=Escherichia coli (strain B / BL21-DE3) OX=469008 GN=leuC PE=3 SV=1
1363	A0A140SSA6	pepQ	14	12	145	70	50	0.000413957	0.000207132	0.000151265		0.500371	0.365413	0.240226	0.235616	0.187221		Xaa-Pro dipeptidase OS=Escherichia coli (strain B / BL21-DE3) OX=469008 GN=pepQ PE=3 SV=1
1461	A0A140N4H5	yfiD	7	3	27	13	7	0.000268876	0.000134182	7.387e-05		0.499048	0.274737	0.0101414	0.14819	0.186102		Autonomous glycyl radical cofactor OS=Escherichia coli (strain B / BL21-DE3) OX=469008 GN=grcA PE=3 SV=1
1391	A0A140SSA2	glnA	19	16	266	128	83	0.000717299	0.000357759	0.00023718		0.498759	0.330658	0.29626	0.201323	0.185858		Glutamine synthetase OS=Escherichia coli (strain B / BL21-DE3) OX=469008 GN=ECBD_4157 PE=3 SV=1
1568	A0A140NAV6	degP	9	7	75	36	15	0.000200113	9.95584e-05	4.24118e-05		0.497512	0.21194	0.15286	0.0938202	0.184806		Periplasmic serine endoprotease DegP-like OS=Escherichia coli (strain B / BL21-DE3) OX=469008 GN=ECBD_3457 PE=3 SV=1
1628	A0A140NEK5	yjiA	8	2	50	24	7	0.000198854	9.89323e-05	2.95015e-05		0.497512	0.148358	0.0380678	0.0479819	0.184806		Cobalamin synthesis protein P47K OS=Escherichia coli (strain B / BL21-DE3) OX=469008 GN=ECBD_3678 PE=4 SV=1
1383	A0A140NF71	yjdC	7	4	25	12	8	0.000165538	8.23572e-05	5.61345e-05		0.497512	0.339103	0.107142	0.209592	0.184806		Transcriptional regulator, TetR family OS=Escherichia coli (strain B / BL21-DE3) OX=469008 GN=ECBD_3896 PE=4 SV=1
1466	A0A140N6F4	hmp	7	2	25	12	2	7.98429e-05	3.97228e-05	6.76875e-06		0.497512	0.0847759	0.0278541	0.0156286	0.184806		Flavohemoprotein OS=Escherichia coli (strain B / BL21-DE3) OX=469008 GN=hmp PE=3 SV=1
1034	A0A140N885	nuoI	8	5	63	30	33	0.000442649	0.000218475	0.000245706		0.493564	0.55508	0.374005	0.422989	0.181488		NADH-quinone oxidoreductase subunit I OS=Escherichia coli (strain B / BL21-DE3) OX=469008 GN=nuoI PE=3 SV=1
1468	A0A140NDG1	ybjP	3	1	21	10	3	0.000155315	7.6658e-05	2.35125e-05		0.493564	0.151385	0.32806	0.0498937	0.181488		Putative lipoprotein OS=Escherichia coli (strain B / BL21-DE3) OX=469008 GN=ECBD_2729 PE=4 SV=1
1469	A0A140N9W3	ybiC	4	2	19	9	3	6.65638e-05	3.26805e-05	1.11375e-05		0.490966	0.167321	0.0212643	0.0604408	0.179315		Malate/L-lactate dehydrogenase OS=Escherichia coli (strain B / BL21-DE3) OX=469008 GN=ECBD_2822 PE=3 SV=1
1471	A0A140NBN0	mntR	3	1	17	8	2	0.00013871	6.76569e-05	1.72931e-05		0.487757	0.12467	0.0601057	0.0341171	0.176642		Iron (Metal) dependent repressor, DtxR family OS=Escherichia coli (strain B / BL21-DE3) OX=469008 GN=ECBD_2806 PE=4 SV=1
1470	A0A140NCB6	btuR	4	4	17	8	8	0.000109694	5.35042e-05	5.47025e-05		0.487757	0.498681	0.0601057	0.368602	0.176642		Corrinoid adenosyltransferase OS=Escherichia coli (strain B / BL21-DE3) OX=469008 GN=ECBD_2352 PE=3 SV=1
1252	A0A140N953	yecA	4	1	15	7	6	8.58401e-05	4.15202e-05	3.63859e-05		0.483692	0.423879	0.318784	0.294183	0.173276		YecA family protein OS=Escherichia coli (strain B / BL21-DE3) OX=469008 GN=ECBD_1732 PE=3 SV=1
1336	A0A140N9G2	sucD	16	13	537	250	191	0.00235	0.00113396	0.000885746		0.482534	0.376913	0.274002	0.247085	0.172321		Succinate--CoA ligase [ADP-forming] subunit alpha OS=Escherichia coli (strain B / BL21-DE3) OX=469008 GN=sucD PE=3 SV=1
811	A0A140N4Y5	asd	10	10	101	47	66	0.000348054	0.000167875	0.000241019		0.482324	0.692476	0.483863	0.545004	0.172147		Aspartate-semialdehyde dehydrogenase OS=Escherichia coli (strain B / BL21-DE3) OX=469008 GN=asd PE=3 SV=1
949	A0A140NEV1	pepA	16	12	108	50	62	0.000271548	0.000130303	0.000165195		0.479854	0.608345	0.479774	0.472267	0.170116		Probable cytosol aminopeptidase OS=Escherichia coli (strain B / BL21-DE3) OX=469008 GN=pepA PE=3 SV=1
1572	A0A140NFT0	fpr	6	1	26	12	5	0.000132591	6.34284e-05	2.70204e-05		0.478377	0.203788	0.131639	0.0873418	0.168906		Oxidoreductase FAD/NAD(P)-binding domain protein OS=Escherichia coli (strain B / BL21-DE3) OX=469008 GN=ECBD_4100 PE=4 SV=1
1478	A0A140N7F1	ypdB	2	1	13	6	1	6.73822e-05	3.22341e-05	5.49267e-06		0.478377	0.0815152	0.807183	0.0144131	0.168906		Two component transcriptional regulator, LytTR family OS=Escherichia coli (strain B / BL21-DE3) OX=469008 GN=ECBD_1291 PE=4 SV=1
1476	A0A140NGP6	uxuB	3	3	13	6	4	3.38297e-05	1.61834e-05	1.10306e-05		0.478377	0.326061	0.0997359	0.196843	0.168906		Mannitol dehydrogenase domain protein OS=Escherichia coli (strain B / BL21-DE3) OX=469008 GN=ECBD_3712 PE=3 SV=1
1479	A0A140N8L8	hisH	6	2	37	17	4	0.000238747	0.000113696	2.73513e-05		0.476222	0.114562	0.0687208	0.0288267	0.167145		Imidazole glycerol phosphate synthase subunit HisH OS=Escherichia coli (strain B / BL21-DE3) OX=469008 GN=hisH PE=3 SV=1
1662	A0A140NDB2	ybjX	8	2	59	27	6	0.000226115	0.000107252	2.43675e-05		0.474323	0.107766	0.0272137	0.0254937	0.165599		Uncharacterized protein OS=Escherichia coli (strain B / BL21-DE3) OX=469008 GN=ECBD_2717 PE=4 SV=1
1473	A0A140NDZ2	deoA	10	6	35	16	10	0.000100602	4.76674e-05	3.04594e-05		0.473821	0.302771	0.121329	0.174422	0.165191		Thymidine phosphorylase OS=Escherichia coli (strain B / BL21-DE3) OX=469008 GN=deoA PE=3 SV=1
1186	A0A140N5E1	rpe	6	6	55	25	24	0.000309152	0.00014565	0.000142956		0.471129	0.462414	0.235971	0.332737	0.163009		Ribulose-phosphate 3-epimerase OS=Escherichia coli (strain B / BL21-DE3) OX=469008 GN=ECBD_0361 PE=3 SV=1
1477	A0A140N5I2	maeB	16	12	132	60	37	0.00021995	0.000103625	6.53331e-05		0.471129	0.297037	0.240378	0.168981	0.163009		Malate dehydrogenase (Oxaloacetate-decarboxylating) (NADP(+)), Phosphate acetyltransferase OS=Escherichia coli (strain B / BL21-DE3) OX=469008 GN=ECBD_1227 PE=4 SV=1
1239	A0A140NEP7	nagB	4	5	22	10	9	0.0001046	4.92802e-05	4.53455e-05		0.471129	0.433513	0.516613	0.303847	0.163009		Glucosamine-6-phosphate deaminase OS=Escherichia coli (strain B / BL21-DE3) OX=469008 GN=nagB PE=3 SV=1
1485	A0A140N3Y5	yhaJ	4	1	11	5	2	4.6684e-05	2.19942e-05	8.99471e-06		0.471129	0.192672	0.553805	0.0787669	0.163009		Transcriptional regulator, LysR family OS=Escherichia coli (strain B / BL21-DE3) OX=469008 GN=ECBD_0633 PE=3 SV=1
594	A0A140NET7	tatB	6	6	22	10	18	0.000162711	7.6658e-05	0.000141075		0.471129	0.867026	0.477558	0.673317	0.163009		Sec-independent protein translocase protein TatB OS=Escherichia coli (strain B / BL21-DE3) OX=469008 GN=tatB PE=3 SV=1
1474	A0A140NDB7	yaaA	9	4	42	19	12	0.000205883	9.65357e-05	6.23355e-05		0.468885	0.302771	0.616072	0.174422	0.161198		UPF0246 protein YaaA OS=Escherichia coli (strain B / BL21-DE3) OX=469008 GN=yaaA PE=3 SV=1
1447	A0A140NC46	nagA	4	3	20	9	6	6.62153e-05	3.0884e-05	2.10505e-05		0.466418	0.317909	0.445075	0.188941	0.159214		N-acetylglucosamine-6-phosphate deacetylase OS=Escherichia coli (strain B / BL21-DE3) OX=469008 GN=ECBD_2985 PE=3 SV=1
1493	A0A140NBR9	glnQ	2	2	9	4	3	4.74267e-05	2.18475e-05	1.67527e-05		0.460659	0.353233	0.189637	0.223524	0.15462		ABC transporter related OS=Escherichia coli (strain B / BL21-DE3) OX=469008 GN=ECBD_2814 PE=4 SV=1
1489	A0A140N5S6	cpdA	2	3	9	4	6	4.13906e-05	1.90669e-05	2.9241e-05		0.460659	0.706465	0.0930352	0.556436	0.15462		3',5'-cyclic adenosine monophosphate phosphodiesterase CpdA OS=Escherichia coli (strain B / BL21-DE3) OX=469008 GN=cpdA PE=3 SV=1
1491	A0A140NB91	helD	4	6	18	8	8	3.32819e-05	1.53316e-05	1.5675e-05		0.460659	0.470977	0.0537784	0.341253	0.15462		DNA helicase OS=Escherichia coli (strain B / BL21-DE3) OX=469008 GN=ECBD_2632 PE=3 SV=1
1492	A0A140NEC8	holA	4	4	9	4	4	3.31848e-05	1.52869e-05	1.56293e-05		0.460659	0.470977	0.297078	0.341253	0.15462		DNA polymerase III, delta subunit OS=Escherichia coli (strain B / BL21-DE3) OX=469008 GN=ECBD_3011 PE=4 SV=1
1495	A0A140N6I0	galR	3	1	9	4	1	3.31848e-05	1.52869e-05	3.90732e-06		0.460659	0.117744	0.404055	0.0304499	0.15462		Transcriptional regulator, LacI family OS=Escherichia coli (strain B / BL21-DE3) OX=469008 GN=ECBD_0887 PE=4 SV=1
1494	A0A140N388	garK	2	1	9	4	1	2.98751e-05	1.37622e-05	3.51762e-06		0.460659	0.117744	0.404055	0.0304499	0.15462		Glycerate kinase OS=Escherichia coli (strain B / BL21-DE3) OX=469008 GN=ECBD_0618 PE=3 SV=1
1490	A0A140SSA8	ubiB	4	5	9	4	5	2.08469e-05	9.60332e-06	1.2273e-05		0.460659	0.588721	0.297078	0.454378	0.15462		Probable protein kinase UbiB OS=Escherichia coli (strain B / BL21-DE3) OX=469008 GN=ubiB PE=3 SV=1
1602	A0A140N3Q6	lptA	6	3	32	14	6	0.000218761	9.91997e-05	4.34663e-05		0.453462	0.198693	0.259733	0.0833734	0.148947		Lipopolysaccharide export system protein LptA OS=Escherichia coli (strain B / BL21-DE3) OX=469008 GN=lptA PE=3 SV=1
1497	A0A140N6L2	rfaP	4	2	16	7	2	7.63599e-05	3.46263e-05	1.01148e-05		0.453462	0.132462	0.170272	0.0384573	0.148947		Lipopolysaccharide core heptose(I) kinase OS=Escherichia coli (strain B / BL21-DE3) OX=469008 GN=ECBD_0096 PE=3 SV=1
1498	A0A140N8A2	pbpG	7	7	39	17	13	0.000157584	7.11965e-05	5.56638e-05		0.451801	0.353233	0.0109917	0.223524	0.147648		Peptidase S11 D-alanyl-D-alanine carboxypeptidase 1 OS=Escherichia coli (strain B / BL21-DE3) OX=469008 GN=ECBD_1524 PE=3 SV=1
1196	A0A140N319	yhbJ	6	4	30	13	13	0.000133596	6.00038e-05	6.13477e-05		0.449143	0.459203	0.0763837	0.329538	0.14558		RNase adapter protein RapZ OS=Escherichia coli (strain B / BL21-DE3) OX=469008 GN=rapZ PE=3 SV=1
1315	A0A140N4Y2	ppiA	7	6	93	40	34	0.000619043	0.000275969	0.000239827		0.445799	0.387417	0.150165	0.257593	0.142994		Peptidyl-prolyl cis-trans isomerase OS=Escherichia coli (strain B / BL21-DE3) OX=469008 GN=ECBD_0385 PE=3 SV=1
1505	A0A140NEW2	yajD	3	1	14	6	2	0.000153965	6.83923e-05	2.3308e-05		0.444207	0.151385	0.212212	0.0498937	0.141768		HNH endonuclease OS=Escherichia coli (strain B / BL21-DE3) OX=469008 GN=ECBD_3251 PE=4 SV=1
1504	A0A140N9J3	yfbT	5	2	21	9	3	0.000122958	5.46189e-05	1.86141e-05		0.444207	0.151385	0.00389693	0.0498937	0.141768		HAD-superfamily hydrolase, subfamily IA, variant 3 OS=Escherichia coli (strain B / BL21-DE3) OX=469008 GN=ECBD_1366 PE=4 SV=1
1506	A0A140N9I6	dgsA	2	1	7	3	1	2.18054e-05	9.6861e-06	3.30102e-06		0.444207	0.151385	0.80266	0.0498937	0.141768		ROK family protein OS=Escherichia coli (strain B / BL21-DE3) OX=469008 GN=ECBD_2052 PE=4 SV=1
1503	A0A140N6Y7	yfhA	3	1	7	3	3	1.99391e-05	8.85711e-06	9.05549e-06		0.444207	0.454156	0.281548	0.324504	0.141768		Putative two component, sigma54 specific, transcriptional regulator, Fis family OS=Escherichia coli (strain B / BL21-DE3) OX=469008 GN=ECBD_1130 PE=4 SV=1
1502	A0A140NG29	rmuC	3	4	7	3	5	1.86379e-05	8.27907e-06	1.41075e-05		0.444207	0.756927	0.418858	0.596027	0.141768		Uncharacterized protein OS=Escherichia coli (strain B / BL21-DE3) OX=469008 GN=ECBD_4191 PE=4 SV=1
1501	A0A140N8M7	yggU	1	2	7	3	6	9.22185e-05	4.09641e-05	8.37633e-05		0.444207	0.908313	0.543376	0.69912	0.141768		UPF0235 protein YggU OS=Escherichia coli (strain B / BL21-DE3) OX=469008 GN=yggU PE=3 SV=1
1507	A0A140NAG2	puuC	3	1	7	3	1	1.78848e-05	7.94456e-06	2.7075e-06		0.444207	0.151385	0.0396405	0.0498937	0.141768		Aldehyde Dehydrogenase OS=Escherichia coli (strain B / BL21-DE3) OX=469008 GN=ECBD_2317 PE=3 SV=1
1216	A0A140NDL8	yiiD	5	5	19	8	8	7.67716e-05	3.35042e-05	3.42546e-05		0.436414	0.446189	0.126429	0.316542	0.135829		Thioesterase domain protein OS=Escherichia coli (strain B / BL21-DE3) OX=469008 GN=ECBD_4139 PE=4 SV=1
1020	A0A140NAN1	dld	13	13	88	37	47	0.000194912	8.49414e-05	0.000110315		0.435794	0.565975	0.46752	0.43325	0.135361		Quinone-dependent D-lactate dehydrogenase OS=Escherichia coli (strain B / BL21-DE3) OX=469008 GN=dld PE=3 SV=1
1545	A0A140NC10	gltA	16	15	464	195	109	0.0013743	0.000598633	0.000342115		0.435591	0.248938	0.206628	0.125003	0.135208		Citrate synthase OS=Escherichia coli (strain B / BL21-DE3) OX=469008 GN=ECBD_2941 PE=3 SV=1
1131	A0A140NH47	argC	3	3	24	10	11	9.08775e-05	3.92471e-05	4.41387e-05		0.431868	0.485695	0.269906	0.355824	0.13241		N-acetyl-gamma-glutamyl-phosphate reductase OS=Escherichia coli (strain B / BL21-DE3) OX=469008 GN=argC PE=3 SV=1
1512	A0A140N789	bioH	3	1	12	5	4	5.92833e-05	2.56026e-05	2.09408e-05		0.431868	0.353233	0.0537784	0.223524	0.13241		Pimeloyl-[acyl-carrier protein] methyl ester esterase OS=Escherichia coli (strain B / BL21-DE3) OX=469008 GN=bioH PE=3 SV=1
1603	A0A140N8G3	gcvT	10	8	119	49	22	0.000413463	0.000176461	8.10018e-05		0.426787	0.195911	0.153564	0.0812329	0.128631		Aminomethyltransferase OS=Escherichia coli (strain B / BL21-DE3) OX=469008 GN=gcvT PE=3 SV=1
1515	A0A140N8F4	ycdX	3	1	17	7	1	8.77555e-05	3.74529e-05	5.47025e-06		0.426787	0.0623352	0.0601057	0.00823279	0.128631		Probable phosphatase YcdX OS=Escherichia coli (strain B / BL21-DE3) OX=469008 GN=ycdX PE=3 SV=1
1513	A0A140N8T5	yebK	3	3	17	7	4	7.43948e-05	3.17508e-05	1.85497e-05		0.426787	0.249341	0.208199	0.125357	0.128631		Transcriptional regulator, RpiR family OS=Escherichia coli (strain B / BL21-DE3) OX=469008 GN=ECBD_1785 PE=4 SV=1
1081	A0A140NEG9	argB	10	8	78	32	39	0.000382355	0.000162586	0.00020259		0.425224	0.529849	0.313782	0.398904	0.127477		Acetylglutamate kinase OS=Escherichia coli (strain B / BL21-DE3) OX=469008 GN=argB PE=1 SV=1
1499	A0A140NGL5	hsdR	19	12	79	32	21	8.5395e-05	3.58524e-05	2.40551e-05		0.419841	0.281692	0.0974283	0.154608	0.123536		Type I site-specific deoxyribonuclease OS=Escherichia coli (strain B / BL21-DE3) OX=469008 GN=ECBD_3680 PE=4 SV=1
1518	A0A140N6L4	hisF	7	2	42	17	4	0.000205883	8.6374e-05	2.07785e-05		0.419529	0.100924	0.0172604	0.0223262	0.123309		Imidazole glycerol phosphate synthase subunit HisF OS=Escherichia coli (strain B / BL21-DE3) OX=469008 GN=hisF PE=3 SV=1
1370	A0A140N903	ptsG	10	9	90	36	30	0.000238625	9.89323e-05	8.42901e-05		0.414593	0.353233	0.210695	0.223524	0.119742		PTS system, glucose-specific IIBC subunit OS=Escherichia coli (strain B / BL21-DE3) OX=469008 GN=ECBD_2500 PE=4 SV=1
1550	A0A140N3Y7	tas	7	3	45	18	10	0.000164486	6.81946e-05	3.87345e-05		0.414593	0.235488	0.110768	0.113356	0.119742		Aldo/keto reductase OS=Escherichia coli (strain B / BL21-DE3) OX=469008 GN=ECBD_0890 PE=4 SV=1
1253	A0A140N7L7	hisP	3	3	15	6	6	7.38158e-05	3.06036e-05	3.1289e-05		0.414593	0.423879	0.253638	0.294183	0.119742		ABC transporter related OS=Escherichia coli (strain B / BL21-DE3) OX=469008 GN=ECBD_1353 PE=4 SV=1
1533	A0A140NB11	yeaO	1	1	5	2	1	5.49874e-05	2.27974e-05	1.1654e-05		0.414593	0.21194	0.0763837	0.0938202	0.119742		Uncharacterized protein OS=Escherichia coli (strain B / BL21-DE3) OX=469008 GN=ECBD_1853 PE=4 SV=1
1524	A0A140NF50	frdB	2	2	10	4	4	5.18324e-05	2.14894e-05	2.19707e-05		0.414593	0.423879	0.253638	0.294183	0.119742		Succinate dehydrogenase iron-sulfur subunit OS=Escherichia coli (strain B / BL21-DE3) OX=469008 GN=ECBD_3876 PE=3 SV=1
1529	A0A140NDR9	apaG	1	1	5	2	2	5.05885e-05	2.09736e-05	2.14434e-05		0.414593	0.423879	0.0763837	0.294183	0.119742		Protein ApaG OS=Escherichia coli (strain B / BL21-DE3) OX=469008 GN=apaG PE=3 SV=1
1522	A0A140NCU8	puuR	2	3	5	2	3	3.41814e-05	1.41714e-05	2.17332e-05		0.414593	0.635819	0.253638	0.496747	0.119742		Transcriptional regulator, XRE family OS=Escherichia coli (strain B / BL21-DE3) OX=469008 GN=ECBD_2318 PE=4 SV=1
1534	A0A140NAB9	ybl96	1	1	5	2	1	3.29352e-05	1.36547e-05	6.98027e-06		0.414593	0.21194	0.0763837	0.0938202	0.119742		Acetyltransferase OS=Escherichia coli (strain B / BL21-DE3) OX=469008 GN=ECBD_1620 PE=4 SV=1
1526	A0A140N5S1	dgoR	2	2	5	2	2	2.76138e-05	1.14485e-05	1.17049e-05		0.414593	0.423879	0.445075	0.294183	0.119742		GntR domain protein OS=Escherichia coli (strain B / BL21-DE3) OX=469008 GN=ECBD_0008 PE=4 SV=1
1527	A0A140N941	moeB	1	1	5	2	2	2.53958e-05	1.05289e-05	1.07648e-05		0.414593	0.423879	0.609201	0.294183	0.119742		Molybdopterin synthase sulfurylase MoeB OS=Escherichia coli (strain B / BL21-DE3) OX=469008 GN=ECBD_2797 PE=4 SV=1
1537	A0A140NAC5	mppA	4	1	10	4	1	2.35514e-05	9.76426e-06	2.49574e-06		0.414593	0.10597	0.158867	0.0246438	0.119742		Extracellular solute-binding protein family 5 OS=Escherichia coli (strain B / BL21-DE3) OX=469008 GN=ECBD_2287 PE=4 SV=1
1528	A0A140N9Y0	moaA	2	2	5	2	2	1.92205e-05	7.96871e-06	8.14719e-06		0.414593	0.423879	0.0763837	0.294183	0.119742		GTP 3',8-cyclase OS=Escherichia coli (strain B / BL21-DE3) OX=469008 GN=moaA PE=3 SV=1
1535	A0A140NC69	mrdB	2	1	5	2	1	1.70907e-05	7.08569e-06	3.6222e-06		0.414593	0.21194	0.609201	0.0938202	0.119742		Peptidoglycan glycosyltransferase MrdB OS=Escherichia coli (strain B / BL21-DE3) OX=469008 GN=mrdB PE=3 SV=1
1520	A0A140NDQ6	fadA	2	3	5	2	3	1.63399e-05	6.77443e-06	1.03892e-05		0.414593	0.635819	0.445075	0.496747	0.119742		3-ketoacyl-CoA thiolase OS=Escherichia coli (strain B / BL21-DE3) OX=469008 GN=fadA PE=3 SV=1
1521	A0A140N7Z6	hemA	2	3	5	2	3	1.51281e-05	6.27202e-06	9.61875e-06		0.414593	0.635819	0.734989	0.496747	0.119742		Glutamyl-tRNA reductase OS=Escherichia coli (strain B / BL21-DE3) OX=469008 GN=hemA PE=3 SV=1
1519	A0A140NDJ8	aroP	1	2	5	2	5	1.38674e-05	5.74935e-06	1.46953e-05		0.414593	1.0597	0.253638	0.779818	0.119742		Amino acid permease-associated region OS=Escherichia coli (strain B / BL21-DE3) OX=469008 GN=ECBD_3507 PE=4 SV=1
1530	A0A140N755	nuoN	1	1	5	2	2	1.30383e-05	5.40558e-06	5.52665e-06		0.414593	0.423879	0.445075	0.294183	0.119742		NADH-quinone oxidoreductase subunit N OS=Escherichia coli (strain B / BL21-DE3) OX=469008 GN=nuoN PE=1 SV=1
1525	A0A140ND04	sbcC	4	4	10	4	4	1.20679e-05	5.00325e-06	5.11531e-06		0.414593	0.423879	0.158867	0.294183	0.119742		Nuclease SbcCD subunit C OS=Escherichia coli (strain B / BL21-DE3) OX=469008 GN=sbcC PE=3 SV=1
1536	A0A140NEW6	recQ	1	1	5	2	1	1.03495e-05	4.29084e-06	2.19347e-06		0.414593	0.21194	0.253638	0.0938202	0.119742		ATP-dependent DNA helicase, RecQ family OS=Escherichia coli (strain B / BL21-DE3) OX=469008 GN=ECBD_4216 PE=4 SV=1
1179	A0A140NA80	sdhA	26	24	692	275	305	0.0014884	0.000613069	0.000695178		0.411897	0.467063	0.270848	0.337364	0.117813		Succinate dehydrogenase flavoprotein subunit OS=Escherichia coli (strain B / BL21-DE3) OX=469008 GN=ECBD_2937 PE=3 SV=1
1448	A0A140N9K4	nuoE	5	4	151	60	45	0.00115043	0.000473802	0.000363311		0.411848	0.315804	0.133621	0.186909	0.117778		NADH-quinone oxidoreductase, E subunit OS=Escherichia coli (strain B / BL21-DE3) OX=469008 GN=ECBD_1376 PE=4 SV=1
1296	A0A140NG05	yaeH	8	9	58	23	22	0.000573072	0.000235544	0.000230349		0.411019	0.401954	0.200484	0.272172	0.117187		UPF0325 protein YaeH OS=Escherichia coli (strain B / BL21-DE3) OX=469008 GN=yaeH PE=3 SV=1
1548	A0A140NBE6	ltaE	9	6	53	21	12	0.00020129	8.26664e-05	4.82959e-05		0.410682	0.239932	0.268369	0.117167	0.116948		Threonine aldolase OS=Escherichia coli (strain B / BL21-DE3) OX=469008 GN=ECBD_2724 PE=4 SV=1
1087	A0A140NAY3	hisB	9	9	53	21	26	0.000188816	7.75434e-05	9.81564e-05		0.410682	0.519852	0.249963	0.389246	0.116948		Histidine biosynthesis bifunctional protein HisB OS=Escherichia coli (strain B / BL21-DE3) OX=469008 GN=hisB PE=3 SV=1
1430	A0A140NBL1	nagD	7	6	76	30	23	0.000384472	0.000157302	0.0001233		0.409138	0.320698	0.197906	0.191638	0.115852		HAD-superfamily hydrolase, subfamily IIA OS=Escherichia coli (strain B / BL21-DE3) OX=469008 GN=ECBD_2987 PE=4 SV=1
1544	A0A140N8B3	ptrA	9	2	28	11	2	3.68107e-05	1.4989e-05	2.7863e-06		0.40719	0.0756927	0.0220589	0.0123602	0.114476		Peptidase M16 domain protein OS=Escherichia coli (strain B / BL21-DE3) OX=469008 GN=ECBD_0904 PE=3 SV=1
1263	A0A140N9E6	yfjF	2	2	23	9	9	0.000303004	0.000122892	0.000125645		0.405581	0.414664	0.330074	0.284932	0.113344		UPF0125 protein ECBD_1069 OS=Escherichia coli (strain B / BL21-DE3) OX=469008 GN=ECBD_1069 PE=3 SV=1
1547	A0A140N8E4	ycjF	5	3	18	7	4	6.44895e-05	2.59942e-05	1.51865e-05		0.403077	0.235488	0.242829	0.113356	0.111593		UPF0283 membrane protein YcjF OS=Escherichia coli (strain B / BL21-DE3) OX=469008 GN=ycjF PE=3 SV=1
1482	A0A140ND82	putP	3	3	18	7	5	4.53482e-05	1.82788e-05	1.33487e-05		0.403077	0.294361	0.139069	0.166455	0.111593		Sodium/proline symporter OS=Escherichia coli (strain B / BL21-DE3) OX=469008 GN=ECBD_2578 PE=3 SV=1
1623	A0A140NEL5	tpiA	13	6	213	82	34	0.00105641	0.000421529	0.000178695		0.399022	0.169154	0.0552677	0.0617043	0.108783		Triosephosphate isomerase OS=Escherichia coli (strain B / BL21-DE3) OX=469008 GN=tpiA PE=3 SV=1
1293	A0A140NBX4	rnt	2	2	13	5	5	7.64709e-05	3.04849e-05	3.11677e-05		0.398648	0.407576	0.313782	0.277815	0.108525		Ribonuclease T OS=Escherichia coli (strain B / BL21-DE3) OX=469008 GN=rnt PE=3 SV=1
1130	A0A140NAC6	lpxL	3	3	13	5	6	5.37296e-05	2.14192e-05	2.62787e-05		0.398648	0.489091	0.313782	0.359174	0.108525		Lipid A biosynthesis lauroyltransferase OS=Escherichia coli (strain B / BL21-DE3) OX=469008 GN=lpxL PE=3 SV=1
1178	A0A140NHQ8	hslV	3	3	34	13	15	0.000244319	9.68243e-05	0.000114223		0.396303	0.467514	0.153564	0.337812	0.106916		ATP-dependent protease subunit HslV OS=Escherichia coli (strain B / BL21-DE3) OX=469008 GN=hslV PE=2 SV=1
798	A0A140N3E6	glnE	8	9	42	16	28	5.615e-05	2.21709e-05	3.9668e-05		0.394851	0.706465	0.46222	0.556436	0.105925		Bifunctional glutamine synthetase adenylyltransferase/adenylyl-removing enzyme OS=Escherichia coli (strain B / BL21-DE3) OX=469008 GN=glnE PE=3 SV=1
1554	A0A140N6S0	ispF	3	2	37	14	5	0.000294304	0.000115421	4.2145e-05		0.392183	0.143202	0.0122936	0.0447971	0.104114		2-C-methyl-D-erythritol 2,4-cyclodiphosphate synthase OS=Escherichia coli (strain B / BL21-DE3) OX=469008 GN=ispF PE=3 SV=1
1347	A0A140NH84	fumB	5	5	37	14	13	8.53911e-05	3.34889e-05	3.17934e-05		0.392183	0.372326	0.364147	0.242505	0.104114		Fumarate hydratase class I OS=Escherichia coli (strain B / BL21-DE3) OX=469008 GN=ECBD_3909 PE=3 SV=1
1088	A0A140N312	uspA	3	2	45	17	22	0.000395222	0.000154753	0.000204755		0.39156	0.518075	0.210695	0.387523	0.103694		Universal stress protein OS=Escherichia coli (strain B / BL21-DE3) OX=469008 GN=ECBD_0246 PE=3 SV=1
1557	A0A140NCB1	qor	5	2	24	9	3	9.28229e-05	3.60785e-05	1.22955e-05		0.388681	0.132462	0.229377	0.0384573	0.101759		Alcohol dehydrogenase zinc-binding domain protein OS=Escherichia coli (strain B / BL21-DE3) OX=469008 GN=ECBD_3982 PE=4 SV=1
1556	A0A140NBK3	fldA	2	1	8	3	2	5.74869e-05	2.23441e-05	1.52297e-05		0.388681	0.264925	0.229377	0.139251	0.101759		Flavodoxin OS=Escherichia coli (strain B / BL21-DE3) OX=469008 GN=ECBD_2977 PE=3 SV=1
1558	A0A140NAV3	copA	5	2	19	7	3	2.88124e-05	1.10024e-05	4.82091e-06		0.381862	0.167321	0.223033	0.0604408	0.0972413		Copper-translocating P-type ATPase OS=Escherichia coli (strain B / BL21-DE3) OX=469008 GN=ECBD_3172 PE=3 SV=1
697	A0A140NFP4	leuA	6	9	30	11	22	7.25456e-05	2.75705e-05	5.6376e-05		0.380044	0.777112	0.752322	0.611131	0.0960523		2-isopropylmalate synthase OS=Escherichia coli (strain B / BL21-DE3) OX=469008 GN=leuA PE=3 SV=1
1561	A0A140N4I6	ilvN	1	2	11	4	5	0.000144915	5.46189e-05	6.98027e-05		0.376903	0.481681	0.477558	0.351859	0.0940145		Acetolactate synthase, small subunit OS=Escherichia coli (strain B / BL21-DE3) OX=469008 GN=ECBD_0033 PE=4 SV=1
1560	A0A140N7B4	mlaB	3	3	11	4	7	0.000143421	5.40558e-05	9.67163e-05		0.376903	0.674353	0.306953	0.529906	0.0940145		STAS domain-containing protein OS=Escherichia coli (strain B / BL21-DE3) OX=469008 GN=ECBD_0551 PE=4 SV=1
1562	A0A140N8U6	aroF	3	1	11	4	2	3.90782e-05	1.47287e-05	7.52928e-06		0.376903	0.192672	0.62224	0.0787669	0.0940145		Phospho-2-dehydro-3-deoxyheptonate aldolase OS=Escherichia coli (strain B / BL21-DE3) OX=469008 GN=ECBD_1085 PE=3 SV=1
1500	A0A140NG25	yjiY	7	6	113	41	30	0.000199598	7.50628e-05	5.61541e-05		0.376069	0.281336	0.167734	0.154278	0.0934769		Carbon starvation protein CstA OS=Escherichia coli (strain B / BL21-DE3) OX=469008 GN=ECBD_3676 PE=4 SV=1
1352	A0A140N4G4	gcvP	23	17	169	61	59	0.00022334	8.35549e-05	8.26254e-05		0.374115	0.369954	0.250181	0.240139	0.0922227		Glycine dehydrogenase (decarboxylating) OS=Escherichia coli (strain B / BL21-DE3) OX=469008 GN=gcvP PE=3 SV=1
840	A0A140N443	ygiB	5	7	39	14	25	0.000221183	8.22957e-05	0.000150248		0.372071	0.679294	0.458945	0.534054	0.0909188		UPF0441 protein YgiB OS=Escherichia coli (strain B / BL21-DE3) OX=469008 GN=ygiB PE=3 SV=1
955	A0A140NDS1	moaB	5	5	14	5	8	0.000104153	3.85545e-05	6.30688e-05		0.370173	0.605542	0.281548	0.469731	0.0897158		Molybdenum cofactor biosynthesis protein B OS=Escherichia coli (strain B / BL21-DE3) OX=469008 GN=ECBD_2841 PE=3 SV=1
1208	A0A140N7K6	rng	6	3	28	10	12	7.2417e-05	2.68068e-05	3.28886e-05		0.370173	0.454156	0.212212	0.324504	0.0897158		Ribonuclease, Rne/Rng family OS=Escherichia coli (strain B / BL21-DE3) OX=469008 GN=ECBD_0500 PE=4 SV=1
1675	A0A140NBX8	artI	6	2	59	21	6	0.00030707	0.000113284	3.30917e-05		0.368918	0.107766	0.0197939	0.0254937	0.0889247		Cationic amino acid ABC transporter, periplasmic binding protein OS=Escherichia coli (strain B / BL21-DE3) OX=469008 GN=ECBD_2731 PE=3 SV=1
1458	A0A140NA85	dcd	2	3	17	6	5	0.000111399	4.07519e-05	3.47205e-05		0.365818	0.311676	0.43435	0.182936	0.0869843		dCTP deaminase OS=Escherichia coli (strain B / BL21-DE3) OX=469008 GN=dcd PE=3 SV=1
1567	A0A140NF84	crl	7	5	122	43	25	0.00116011	0.000423809	0.00025192		0.365318	0.217151	0.0254144	0.0980419	0.0866734		Sigma factor-binding protein Crl OS=Escherichia coli (strain B / BL21-DE3) OX=469008 GN=crl PE=3 SV=1
1613	A0A140N9D3	ptsH	6	4	397	139	69	0.00590695	0.00214363	0.00108794		0.3629	0.184179	0.0121407	0.072429	0.0851764		Phosphotransferase system, phosphocarrier protein HPr OS=Escherichia coli (strain B / BL21-DE3) OX=469008 GN=ECBD_1266 PE=4 SV=1
1083	A0A140N7P6	nuoL	1	2	20	7	10	4.1263e-05	1.4969e-05	2.18632e-05		0.362769	0.529849	0.489462	0.398904	0.0850959		Proton-translocating NADH-quinone oxidoreductase, chain L OS=Escherichia coli (strain B / BL21-DE3) OX=469008 GN=ECBD_1383 PE=1 SV=1
923	A0A140SS89	fadB	7	8	20	7	12	3.46972e-05	1.25871e-05	2.20611e-05		0.362769	0.635819	0.205397	0.496747	0.0850959		Fatty acid oxidation complex subunit alpha OS=Escherichia coli (strain B / BL21-DE3) OX=469008 GN=fadB PE=3 SV=1
1254	A0A140N6N9	malQ	1	2	20	7	8	3.6447e-05	1.32219e-05	1.54491e-05		0.362769	0.423879	0.253638	0.294183	0.0850959		4-alpha-glucanotransferase OS=Escherichia coli (strain B / BL21-DE3) OX=469008 GN=ECBD_0329 PE=3 SV=1
1575	A0A140ND08	cyaA	5	2	20	7	3	2.98281e-05	1.08207e-05	4.74132e-06		0.362769	0.158955	0.253638	0.054804	0.0850959		Adenylate cyclase OS=Escherichia coli (strain B / BL21-DE3) OX=469008 GN=ECBD_4236 PE=3 SV=1
1576	A0A140NGD5	ispH	7	2	43	15	9	0.000172097	6.2224e-05	3.81706e-05		0.361564	0.221797	0.00892098	0.101856	0.0843548		4-hydroxy-3-methylbut-2-enyl diphosphate reductase OS=Escherichia coli (strain B / BL21-DE3) OX=469008 GN=ispH PE=3 SV=1
1605	A0A140N201	mtlA	6	5	38	13	7	7.54459e-05	2.67521e-05	1.47276e-05		0.354586	0.195208	0.274194	0.0806952	0.080125		PTS system, mannitol-specific IIC subunit OS=Escherichia coli (strain B / BL21-DE3) OX=469008 GN=ECBD_0129 PE=4 SV=1
1597	A0A140SS61	rsd	2	1	9	3	2	7.20405e-05	2.48896e-05	1.69647e-05		0.345495	0.235488	0.0930352	0.113356	0.0747717		Regulator of sigma D OS=Escherichia coli (strain B / BL21-DE3) OX=469008 GN=rsd PE=3 SV=1
1591	A0A140NBZ1	nth	3	3	9	3	4	5.3945e-05	1.86377e-05	2.54069e-05		0.345495	0.470977	0.297078	0.341253	0.0747717		Endonuclease III OS=Escherichia coli (strain B / BL21-DE3) OX=469008 GN=nth PE=3 SV=1
1596	A0A140SSB9	rffC	3	2	9	3	2	5.08143e-05	1.75561e-05	1.19662e-05		0.345495	0.235488	0.189637	0.113356	0.0747717		dTDP-fucosamine acetyltransferase OS=Escherichia coli (strain B / BL21-DE3) OX=469008 GN=wecD PE=3 SV=1
1584	A0A140N7X8	elaA	1	3	6	2	5	4.95965e-05	1.71353e-05	4.37978e-05		0.345495	0.883082	0.351139	0.683554	0.0747717		GCN5-related N-acetyltransferase OS=Escherichia coli (strain B / BL21-DE3) OX=469008 GN=ECBD_1391 PE=4 SV=1
1592	A0A140NGZ8	ytfG	3	3	9	3	4	3.97986e-05	1.37502e-05	1.87442e-05		0.345495	0.470977	0.0237808	0.341253	0.0747717		NmrA family protein OS=Escherichia coli (strain B / BL21-DE3) OX=469008 GN=ECBD_3818 PE=4 SV=1
1581	A0A140N331	acpT	1	1	6	2	6	3.89142e-05	1.34446e-05	4.12373e-05		0.345495	1.0597	0.0537784	0.779818	0.0747717		4'-phosphopantetheinyl transferase OS=Escherichia coli (strain B / BL21-DE3) OX=469008 GN=ECBD_0266 PE=3 SV=1
1590	A0A140NAS6	puuB	1	2	12	4	6	3.56257e-05	1.23085e-05	1.88762e-05		0.345495	0.529849	0.115353	0.398904	0.0747717		FAD dependent oxidoreductase OS=Escherichia coli (strain B / BL21-DE3) OX=469008 GN=ECBD_2316 PE=4 SV=1
1593	A0A140NE12	dnaC	2	2	6	2	2	3.09725e-05	1.07008e-05	1.09405e-05		0.345495	0.353233	0.189637	0.223524	0.0747717		AAA ATPase OS=Escherichia coli (strain B / BL21-DE3) OX=469008 GN=ECBD_3658 PE=4 SV=1
1598	A0A140NF94	dnaQ	2	1	6	2	1	3.08466e-05	1.06573e-05	5.44802e-06		0.345495	0.176616	0.189637	0.0669504	0.0747717		DNA polymerase III subunit epsilon OS=Escherichia coli (strain B / BL21-DE3) OX=469008 GN=dnaQ PE=4 SV=1
1599	A0A140N6J5	livK	2	1	9	3	1	3.08466e-05	1.06573e-05	3.63201e-06		0.345495	0.117744	0.0930352	0.0304499	0.0747717		Extracellular ligand-binding receptor OS=Escherichia coli (strain B / BL21-DE3) OX=469008 GN=ECBD_0283 PE=4 SV=1
1586	A0A140NAG9	ccmE	1	2	3	1	2	2.38625e-05	8.24436e-06	1.6858e-05		0.345495	0.706465	0.972162	0.556436	0.0747717		Cytochrome c-type biogenesis protein CcmE OS=Escherichia coli (strain B / BL21-DE3) OX=469008 GN=ccmE PE=3 SV=1
1594	A0A140SS26	mutL	3	2	9	3	3	1.8508e-05	6.3944e-06	6.53762e-06		0.345495	0.353233	0.404055	0.223524	0.0747717		DNA mismatch repair protein MutL OS=Escherichia coli (strain B / BL21-DE3) OX=469008 GN=mutL PE=3 SV=1
1585	A0A140N705	mnmC	2	3	9	3	7	1.70395e-05	5.88706e-06	1.40441e-05		0.345495	0.82421	0.297078	0.64474	0.0747717		tRNA 5-methylaminomethyl-2-thiouridine biosynthesis bifunctional protein MnmC OS=Escherichia coli (strain B / BL21-DE3) OX=469008 GN=mnmC PE=3 SV=1
1582	A0A140N6K9	endA	1	2	3	1	3	1.61453e-05	5.5781e-06	1.71091e-05		0.345495	1.0597	0.189637	0.779818	0.0747717		Deoxyribonuclease I OS=Escherichia coli (strain B / BL21-DE3) OX=469008 GN=ECBD_0795 PE=4 SV=1
1595	A0A140N6N1	glpD	2	1	6	2	2	1.51462e-05	5.23294e-06	5.35015e-06		0.345495	0.353233	0.503795	0.223524	0.0747717		Glycerol-3-phosphate dehydrogenase OS=Escherichia coli (strain B / BL21-DE3) OX=469008 GN=ECBD_0316 PE=3 SV=1
1579	A0A140NB10	yceM	1	1	3	1	4	1.23587e-05	4.26988e-06	1.7462e-05		0.345495	1.41293	0.503795	0.898978	0.0747717		Virulence factor MviM-like protein OS=Escherichia coli (strain B / BL21-DE3) OX=469008 GN=ECBD_2532 PE=4 SV=1
1578	A0A140N593	yphF	1	1	3	1	5	1.16029e-05	4.00872e-06	2.04925e-05		0.345495	1.76616	0.503795	0.955919	0.0747717		Periplasmic binding protein/LacI transcriptional regulator OS=Escherichia coli (strain B / BL21-DE3) OX=469008 GN=ECBD_1136 PE=4 SV=1
1587	A0A140N4P7	bcsZ	1	1	3	1	2	1.03101e-05	3.5621e-06	7.28376e-06		0.345495	0.706465	0.189637	0.556436	0.0747717		Glucanase OS=Escherichia coli (strain B / BL21-DE3) OX=469008 GN=ECBD_0208 PE=3 SV=1
1580	A0A140N758	yhhZ	1	2	3	1	4	9.67891e-06	3.34401e-06	1.36756e-05		0.345495	1.41293	0.503795	0.898978	0.0747717		Type VI secretion system effector, Hcp1 family OS=Escherichia coli (strain B / BL21-DE3) OX=469008 GN=ECBD_0300 PE=4 SV=1
1588	A0A140NCG5	ybcK	1	2	3	1	2	7.46877e-06	2.58042e-06	5.27643e-06		0.345495	0.706465	0.734989	0.556436	0.0747717		Recombinase OS=Escherichia coli (strain B / BL21-DE3) OX=469008 GN=ECBD_3114 PE=4 SV=1
1583	A0A140N8M9	yehU	1	2	3	1	3	6.76316e-06	2.33664e-06	7.16691e-06		0.345495	1.0597	0.189637	0.779818	0.0747717		Signal transduction histidine kinase, LytS OS=Escherichia coli (strain B / BL21-DE3) OX=469008 GN=ECBD_1533 PE=4 SV=1
1589	A0A140N7M6	ygjK	1	2	3	1	2	4.84564e-06	1.67414e-06	3.42328e-06		0.345495	0.706465	0.869138	0.556436	0.0747717		Glycosyl hydrolase OS=Escherichia coli (strain B / BL21-DE3) OX=469008 GN=ECBD_0662 PE=4 SV=1
1612	A0A140N3F8	ribB	4	3	63	20	11	0.000367174	0.000120816	6.7937e-05		0.329042	0.185027	0.0172604	0.0730527	0.0655505		3,4-dihydroxy-2-butanone 4-phosphate synthase OS=Escherichia coli (strain B / BL21-DE3) OX=469008 GN=ribB PE=3 SV=1
1601	A0A140NBI6	gloB	4	3	19	6	5	9.57351e-05	3.13351e-05	2.66975e-05		0.327311	0.278868	0.0483611	0.151995	0.0646154		Hydroxyacylglutathione hydrolase OS=Escherichia coli (strain B / BL21-DE3) OX=469008 GN=gloB PE=3 SV=1
1377	A0A140NCJ7	argH	18	18	283	89	91	0.00078318	0.000255286	0.000266869		0.325961	0.340751	0.168852	0.21121	0.0638915		Argininosuccinate lyase OS=Escherichia coli (strain B / BL21-DE3) OX=469008 GN=argH PE=3 SV=1
1517	A0A140NCH5	cusB	10	6	51	16	13	0.000158477	5.15323e-05	4.28078e-05		0.325171	0.270119	0.341658	0.143966	0.0634697		Efflux transporter, RND family, MFP subunit OS=Escherichia coli (strain B / BL21-DE3) OX=469008 GN=ECBD_3088 PE=3 SV=1
1604	A0A140N6X1	recD	4	2	16	5	4	3.32819e-05	1.078e-05	8.81719e-06		0.323901	0.264925	0.229377	0.139251	0.0627944		RecBCD enzyme subunit RecD OS=Escherichia coli (strain B / BL21-DE3) OX=469008 GN=recD PE=3 SV=1
1365	A0A140ND42	betB	8	8	65	20	22	0.000167768	5.35042e-05	6.01728e-05		0.318918	0.358667	0.138321	0.228911	0.0601811		NAD/NADP-dependent betaine aldehyde dehydrogenase OS=Escherichia coli (strain B / BL21-DE3) OX=469008 GN=betB PE=3 SV=1
1610	A0A140N5C4	yghW	6	1	30	9	3	0.000399383	0.000124186	4.23225e-05		0.310945	0.10597	0.158867	0.0246438	0.0561195		Uncharacterized protein OS=Escherichia coli (strain B / BL21-DE3) OX=469008 GN=ECBD_0739 PE=4 SV=1
1532	A0A140N4H0	yibT	2	2	20	6	5	0.000366583	0.000113987	9.71168e-05		0.310945	0.264925	0.158867	0.139251	0.0561195		Putative cytoplasmic protein OS=Escherichia coli (strain B / BL21-DE3) OX=469008 GN=ECBD_0126 PE=4 SV=1
1607	A0A140NDQ3	leuD	3	2	20	6	5	0.000125842	3.91299e-05	3.33386e-05		0.310945	0.264925	0.0436913	0.139251	0.0561195		3-isopropylmalate dehydratase small subunit OS=Escherichia coli (strain B / BL21-DE3) OX=469008 GN=leuD PE=3 SV=1
1606	A0A140N726	yebY	2	2	10	3	5	0.000111921	3.48014e-05	5.93014e-05		0.310945	0.529849	0.158867	0.398904	0.0561195		Uncharacterized protein OS=Escherichia coli (strain B / BL21-DE3) OX=469008 GN=ECBD_1801 PE=4 SV=1
1609	A0A140N9P6	sad	2	1	10	3	2	2.73747e-05	8.51203e-06	5.80178e-06		0.310945	0.21194	0.0763837	0.0938202	0.0561195		Aldehyde Dehydrogenase OS=Escherichia coli (strain B / BL21-DE3) OX=469008 GN=ECBD_2117 PE=4 SV=1
1631	A0A140NCT8	dhaM	6	4	51	15	7	0.000136653	4.16585e-05	1.9876e-05		0.304848	0.145449	0.0880185	0.0461738	0.0531139		Dihydroxyacetone kinase, phosphotransfer subunit OS=Escherichia coli (strain B / BL21-DE3) OX=469008 GN=ECBD_2424 PE=3 SV=1
871	A0A140N827	epd	6	6	24	7	15	8.95371e-05	2.70678e-05	5.93014e-05		0.302308	0.662311	0.115353	0.519695	0.0518874		D-erythrose-4-phosphate dehydrogenase OS=Escherichia coli (strain B / BL21-DE3) OX=469008 GN=epd PE=3 SV=1
1516	A0A140NDF8	yceH	5	3	31	9	8	0.000182354	5.48729e-05	4.98684e-05		0.300915	0.27347	0.179591	0.147029	0.0512212		UPF0502 protein YceH OS=Escherichia coli (strain B / BL21-DE3) OX=469008 GN=yceH PE=3 SV=1
1379	A0A140NB42	ybhG	7	6	28	8	9	0.000106985	3.16822e-05	3.64408e-05		0.296138	0.340617	0.246685	0.211079	0.0489723		UPF0194 membrane protein YbhG OS=Escherichia coli (strain B / BL21-DE3) OX=469008 GN=ybhG PE=3 SV=1
1538	A0A140NA29	dadX	4	3	28	8	7	9.94717e-05	2.94574e-05	2.63525e-05		0.296138	0.264925	0.146064	0.139251	0.0489723		Alanine racemase OS=Escherichia coli (strain B / BL21-DE3) OX=469008 GN=ECBD_2432 PE=3 SV=1
1622	A0A140NA05	nfo	4	1	21	6	1	9.31893e-05	2.75969e-05	4.7025e-06		0.296138	0.0504618	0.0396405	0.00526209	0.0489723		Probable endonuclease 4 OS=Escherichia coli (strain B / BL21-DE3) OX=469008 GN=nfo PE=3 SV=1
1617	A0A140N7T5	inaA	3	3	14	4	4	8.1972e-05	2.4275e-05	2.48187e-05		0.296138	0.302771	0.0093824	0.174422	0.0489723		Lipopolysaccharide kinase OS=Escherichia coli (strain B / BL21-DE3) OX=469008 GN=ECBD_1423 PE=4 SV=1
1614	A0A140NAM5	ybl95	2	2	14	4	12	7.1395e-05	2.11428e-05	6.4849e-05		0.296138	0.908313	0.598727	0.69912	0.0489723		Uncharacterized protein OS=Escherichia coli (strain B / BL21-DE3) OX=469008 GN=ECBD_1621 PE=4 SV=1
1615	A0A140N9I3	rseA	2	3	7	2	4	4.0986e-05	1.21375e-05	2.48187e-05		0.296138	0.605542	0.649085	0.469731	0.0489723		Anti-sigma-E factor RseA OS=Escherichia coli (strain B / BL21-DE3) OX=469008 GN=ECBD_1109 PE=3 SV=1
1620	A0A140N9H1	yfgC	4	3	14	4	3	3.63572e-05	1.07668e-05	8.25593e-06		0.296138	0.227078	0.212212	0.106246	0.0489723		Beta-barrel assembly-enhancing protease OS=Escherichia coli (strain B / BL21-DE3) OX=469008 GN=bepA PE=3 SV=1
1618	A0A140NFP3	rfe	1	2	7	2	2	2.41226e-05	7.14361e-06	7.30361e-06		0.296138	0.302771	0.281548	0.174422	0.0489723		Undecaprenyl-phosphate alpha-N-acetylglucosaminyl 1-phosphate transferase OS=Escherichia coli (strain B / BL21-DE3) OX=469008 GN=wecA PE=3 SV=1
1621	A0A140N8D1	yfaA	1	1	7	2	1	1.57526e-05	4.66496e-06	2.38472e-06		0.296138	0.151385	0.0396405	0.0498937	0.0489723		Uncharacterized protein YfaA OS=Escherichia coli (strain B / BL21-DE3) OX=469008 GN=ECBD_1430 PE=4 SV=1
1600	A0A140NGU5	acs	12	8	95	27	18	0.000184275	5.42838e-05	3.69997e-05		0.29458	0.200785	0.0921305	0.0849949	0.0482502		Acetyl-coenzyme A synthetase OS=Escherichia coli (strain B / BL21-DE3) OX=469008 GN=acs PE=3 SV=1
991	A0A140N452	qseC	5	6	18	5	10	5.07011e-05	1.45975e-05	2.98488e-05		0.287912	0.588721	0.297078	0.454378	0.0452265		Histidine kinase OS=Escherichia coli (strain B / BL21-DE3) OX=469008 GN=ECBD_0713 PE=4 SV=1
1626	A0A140NEY8	cpdB	12	3	55	15	4	0.00010751	3.03907e-05	8.2857e-06		0.282677	0.077069	0.00524136	0.0128317	0.0429272		2',3'-cyclic-nucleotide 2'-phosphodiesterase OS=Escherichia coli (strain B / BL21-DE3) OX=469008 GN=ECBD_3816 PE=3 SV=1
1625	A0A140N574	dusB	2	3	11	3	5	4.3339e-05	1.2251e-05	2.08756e-05		0.282677	0.481681	0.218434	0.351859	0.0429272		tRNA-dihydrouridine synthase B OS=Escherichia coli (strain B / BL21-DE3) OX=469008 GN=dusB PE=3 SV=1
1627	A0A140NF56	yieF	2	3	11	3	7	7.39991e-05	2.09179e-05	4.99015e-05		0.282677	0.674353	0.218434	0.529906	0.0429272		NADPH-dependent FMN reductase OS=Escherichia coli (strain B / BL21-DE3) OX=469008 GN=ECBD_4319 PE=4 SV=1
1551	A0A140NCJ4	dadA	10	7	81	22	18	0.000237133	6.67564e-05	5.58422e-05		0.281514	0.235488	0.133692	0.113356	0.0424251		D-amino acid dehydrogenase OS=Escherichia coli (strain B / BL21-DE3) OX=469008 GN=dadA PE=3 SV=1
1653	A0A140N9A3	cfa	8	5	70	19	8	0.000231753	6.51995e-05	2.80673e-05		0.281331	0.121108	0.066323	0.0322083	0.0423465		Cyclopropane-fatty-acyl-phospholipid synthase OS=Escherichia coli (strain B / BL21-DE3) OX=469008 GN=ECBD_1982 PE=4 SV=1
1630	A0A140NAB8	grxB	5	2	26	7	4	0.000152942	4.26789e-05	2.49342e-05		0.279053	0.16303	0.0709001	0.0575232	0.0413738		Glutaredoxin, GrxB family OS=Escherichia coli (strain B / BL21-DE3) OX=469008 GN=ECBD_2536 PE=4 SV=1
1632	A0A140N5T5	degQ	8	2	42	11	2	0.000116743	3.16909e-05	5.89104e-06		0.27146	0.0504618	0.0696171	0.00526209	0.0382218		Periplasmic serine endoprotease DegP-like OS=Escherichia coli (strain B / BL21-DE3) OX=469008 GN=ECBD_0513 PE=3 SV=1
1335	A0A140NCT2	frdA	5	7	42	11	15	8.82357e-05	2.39525e-05	3.3394e-05		0.27146	0.378464	0.167541	0.248634	0.0382218		Fumarate reductase flavoprotein subunit OS=Escherichia coli (strain B / BL21-DE3) OX=469008 GN=ECBD_3875 PE=3 SV=1
1633	A0A140NBQ5	hdhA	4	2	27	7	2	0.000133911	3.59842e-05	1.05115e-05		0.268718	0.0784962	0.0426249	0.0133297	0.0371178		Short-chain dehydrogenase/reductase SDR OS=Escherichia coli (strain B / BL21-DE3) OX=469008 GN=ECBD_2026 PE=4 SV=1
1359	A0A140NBK8	yliJ	8	4	52	13	18	0.000316178	8.19283e-05	0.00011598		0.259121	0.366819	0.257388	0.237015	0.0333965		Glutathione S-transferase domain protein OS=Escherichia coli (strain B / BL21-DE3) OX=469008 GN=ECBD_2785 PE=4 SV=1
1645	A0A140N5N0	yhbS	2	1	12	3	1	9.08775e-05	2.35482e-05	8.02522e-06		0.259121	0.0883082	0.0130289	0.0169981	0.0333965		GCN5-related N-acetyltransferase OS=Escherichia coli (strain B / BL21-DE3) OX=469008 GN=ECBD_0584 PE=4 SV=1
1643	A0A140ND53	zur	2	3	12	3	4	8.87517e-05	2.29974e-05	3.135e-05		0.259121	0.353233	0.189637	0.223524	0.0333965		Ferric uptake regulator, Fur family OS=Escherichia coli (strain B / BL21-DE3) OX=469008 GN=ECBD_3987 PE=3 SV=1
1638	A0A140N6V4	pgsA	1	1	4	1	3	2.77959e-05	7.20249e-06	2.20914e-05		0.259121	0.794774	0.115353	0.624003	0.0333965		CDP-diacylglycerol--glycerol-3-phosphate 3-phosphatidyltransferase OS=Escherichia coli (strain B / BL21-DE3) OX=469008 GN=pgsA PE=3 SV=1
1639	A0A140NDA1	pepT	2	3	8	2	4	2.47983e-05	6.42575e-06	1.31393e-05		0.259121	0.529849	0.351139	0.398904	0.0333965		Peptidase T OS=Escherichia coli (strain B / BL21-DE3) OX=469008 GN=pepT PE=3 SV=1
1641	A0A140NDY1	pnuC	1	1	4	1	2	2.11667e-05	5.48474e-06	1.12152e-05		0.259121	0.529849	0.115353	0.398904	0.0333965		Nicotinamide mononucleotide transporter PnuC OS=Escherichia coli (strain B / BL21-DE3) OX=469008 GN=ECBD_2916 PE=4 SV=1
1636	A0A140N6E6	ygdG	1	2	4	1	3	1.8003e-05	4.66496e-06	1.43083e-05		0.259121	0.794774	0.115353	0.624003	0.0333965		Flap endonuclease Xni OS=Escherichia coli (strain B / BL21-DE3) OX=469008 GN=xni PE=3 SV=1
1644	A0A140N855	xerD	1	1	4	1	1	1.6976e-05	4.39883e-06	4.49736e-06		0.259121	0.264925	0.115353	0.139251	0.0333965		Tyrosine recombinase XerD OS=Escherichia coli (strain B / BL21-DE3) OX=469008 GN=xerD PE=3 SV=1
1635	A0A140N9B6	astC	1	2	4	1	3	1.24602e-05	3.2287e-06	9.90305e-06		0.259121	0.794774	0.115353	0.624003	0.0333965		Succinylornithine transaminase OS=Escherichia coli (strain B / BL21-DE3) OX=469008 GN=astC PE=3 SV=1
1640	A0A140NA62	yojI	1	2	4	1	2	9.24835e-06	2.39644e-06	4.90023e-06		0.259121	0.529849	0.115353	0.398904	0.0333965		Cyclic peptide transporter OS=Escherichia coli (strain B / BL21-DE3) OX=469008 GN=ECBD_1448 PE=4 SV=1
1634	A0A140NCQ0	mdlB	1	3	4	1	4	8.53094e-06	2.21054e-06	9.04022e-06		0.259121	1.0597	0.351139	0.779818	0.0333965		ABC transporter related OS=Escherichia coli (strain B / BL21-DE3) OX=469008 GN=ECBD_3206 PE=4 SV=1
1637	A0A140N926	nrdE	1	3	4	1	3	7.08522e-06	1.83593e-06	5.63114e-06		0.259121	0.794774	0.115353	0.624003	0.0333965		Ribonucleoside-diphosphate reductase OS=Escherichia coli (strain B / BL21-DE3) OX=469008 GN=ECBD_1044 PE=3 SV=1
1687	A0A140N856	hisJ	7	4	113	28	6	0.000549663	0.000141169	3.0928e-05		0.256828	0.0562672	0.0216564	0.00663142	0.0325403		Cationic amino acid ABC transporter, periplasmic binding protein OS=Escherichia coli (strain B / BL21-DE3) OX=469008 GN=ECBD_1350 PE=3 SV=1
1647	A0A140N5K0	ubiH	2	2	13	3	2	4.1942e-05	1.0032e-05	6.83782e-06		0.239189	0.16303	0.0997359	0.0575232	0.0263774		Ubiquinone biosynthesis hydroxylase, UbiH/UbiF/VisC/COQ6 family OS=Escherichia coli (strain B / BL21-DE3) OX=469008 GN=ECBD_0830 PE=4 SV=1
1565	A0A140NBF2	manX	13	11	276	63	58	0.00108068	0.000255677	0.000240657		0.236589	0.22269	0.0758607	0.102594	0.0255322		PTS system, mannose/fructose/sorbose family, IIA subunit OS=Escherichia coli (strain B / BL21-DE3) OX=469008 GN=ECBD_1824 PE=4 SV=1
1649	A0A140NFZ6	osmY	2	2	9	2	4	5.7198e-05	1.31744e-05	2.69389e-05		0.23033	0.470977	0.0237808	0.341253	0.0235635		Transport-associated OS=Escherichia coli (strain B / BL21-DE3) OX=469008 GN=ECBD_3645 PE=4 SV=1
1650	A0A140NBM4	glnD	4	4	18	4	5	2.55784e-05	5.89147e-06	7.52928e-06		0.23033	0.294361	0.139069	0.166455	0.0235635		Bifunctional uridylyltransferase/uridylyl-removing enzyme OS=Escherichia coli (strain B / BL21-DE3) OX=469008 GN=glnD PE=3 SV=1
1611	A0A140NEK3	rraA	3	2	28	6	5	0.00021995	4.88516e-05	4.16215e-05		0.222104	0.189232	0.212212	0.0761764	0.0211172		Regulator of ribonuclease activity A OS=Escherichia coli (strain B / BL21-DE3) OX=469008 GN=rraA PE=3 SV=1
1648	A0A140N982	putA	36	19	362	74	47	0.000346838	7.34872e-05	4.77197e-05		0.211878	0.137585	0.0497747	0.0414306	0.0182973		Bifunctional protein PutA OS=Escherichia coli (strain B / BL21-DE3) OX=469008 GN=ECBD_2580 PE=3 SV=1
1642	A0A140NBG5	clpA	19	13	293	59	40	0.000488866	0.000102032	7.07236e-05		0.208712	0.144669	0.0901128	0.0456938	0.0174733		ATP-dependent Clp protease, ATP-binding subunit clpA OS=Escherichia coli (strain B / BL21-DE3) OX=469008 GN=ECBD_2712 PE=3 SV=1
1658	A0A140N6G5	yhiI	3	4	20	4	6	7.12513e-05	1.47702e-05	2.26515e-05		0.207297	0.317909	0.115353	0.188941	0.0171125		Secretion protein HlyD family protein OS=Escherichia coli (strain B / BL21-DE3) OX=469008 GN=ECBD_0253 PE=4 SV=1
1655	A0A140NAY7	ybaY	1	2	10	2	5	6.65638e-05	1.37984e-05	3.52687e-05		0.207297	0.529849	0.158867	0.398904	0.0171125		Glycoprotein/polysaccharide metabolism OS=Escherichia coli (strain B / BL21-DE3) OX=469008 GN=ECBD_3202 PE=4 SV=1
1659	A0A140N9D7	ydcI	3	1	15	3	4	6.17937e-05	1.28096e-05	1.7462e-05		0.207297	0.282586	0.558617	0.155438	0.0171125		Transcriptional regulator, LysR family OS=Escherichia coli (strain B / BL21-DE3) OX=469008 GN=ECBD_2217 PE=3 SV=1
1660	A0A140N2G7	glgC	2	2	15	3	3	4.40155e-05	9.12426e-06	9.32862e-06		0.207297	0.21194	0.0763837	0.0938202	0.0171125		Glucose-1-phosphate adenylyltransferase OS=Escherichia coli (strain B / BL21-DE3) OX=469008 GN=glgC PE=3 SV=1
1661	A0A140N884	pabC	1	1	5	1	1	2.35076e-05	4.87306e-06	4.9822e-06		0.207297	0.21194	0.0763837	0.0938202	0.0171125		Aminodeoxychorismate lyase OS=Escherichia coli (strain B / BL21-DE3) OX=469008 GN=ECBD_2505 PE=3 SV=1
1657	A0A140SS85	glnL	1	2	5	1	2	1.81191e-05	3.75602e-06	7.6803e-06		0.207297	0.423879	0.0763837	0.294183	0.0171125		Signal transduction histidine kinase, nitrogen specific, NtrB OS=Escherichia coli (strain B / BL21-DE3) OX=469008 GN=ECBD_4158 PE=4 SV=1
1654	A0A140N9W2	kch	1	3	5	1	3	1.51644e-05	3.14353e-06	9.64181e-06		0.207297	0.635819	0.445075	0.496747	0.0171125		TrkA-N domain protein OS=Escherichia coli (strain B / BL21-DE3) OX=469008 GN=ECBD_2372 PE=4 SV=1
1656	A0A140ND39	ilvI	1	2	5	1	2	1.10166e-05	2.28372e-06	4.66973e-06		0.207297	0.423879	0.253638	0.294183	0.0171125		Acetolactate synthase OS=Escherichia coli (strain B / BL21-DE3) OX=469008 GN=ECBD_3539 PE=3 SV=1
1264	A0A140N9E9	manZ	7	8	110	21	43	0.000491584	9.72717e-05	0.000203636		0.197874	0.414246	0.150689	0.284511	0.0148259		PTS system, mannose/fructose/sorbose family, IID subunit OS=Escherichia coli (strain B / BL21-DE3) OX=469008 GN=ECBD_1822 PE=4 SV=1
1663	A0A140N9F0	add	10	1	124	23	3	0.000470944	9.05394e-05	1.2074e-05		0.192251	0.0256379	0.00970928	0.00122075	0.0135562		Adenosine deaminase OS=Escherichia coli (strain B / BL21-DE3) OX=469008 GN=add PE=3 SV=1
1664	A0A140N901	fucU	3	1	27	5	4	0.000243909	4.68162e-05	3.82918e-05		0.191941	0.156992	0.0930352	0.0535133	0.0134884		L-fucose mutarotase OS=Escherichia coli (strain B / BL21-DE3) OX=469008 GN=fucU PE=3 SV=1
1666	A0A140NAV5	yceI	2	2	11	2	2	7.28368e-05	1.37262e-05	1.40336e-05		0.188452	0.192672	0.015655	0.0787669	0.0127379		Protein YceI OS=Escherichia coli (strain B / BL21-DE3) OX=469008 GN=yceI PE=3 SV=1
1665	A0A140N2M6	waaA	1	2	11	2	2	3.27337e-05	6.16872e-06	6.30688e-06		0.188452	0.192672	0.218434	0.0787669	0.0127379		3-deoxy-D-manno-octulosonic acid transferase OS=Escherichia coli (strain B / BL21-DE3) OX=469008 GN=ECBD_0093 PE=3 SV=1
1667	A0A140N866	yfcD	4	4	34	6	7	0.00023889	4.36951e-05	5.21194e-05		0.182909	0.218173	0.00134403	0.0988768	0.0116005		NUDIX hydrolase OS=Escherichia coli (strain B / BL21-DE3) OX=469008 GN=ECBD_1360 PE=4 SV=1
1668	A0A140N3P4	yibD	4	1	34	6	1	0.000125001	2.28637e-05	3.89597e-06		0.182909	0.0311676	0.00617506	0.00186673	0.0116005		Glycosyl transferase family 2 OS=Escherichia coli (strain B / BL21-DE3) OX=469008 GN=ECBD_0110 PE=4 SV=1
1669	A0A140NA20	dhaK	3	1	23	4	1	8.17089e-05	1.47287e-05	3.76464e-06		0.180258	0.0460738	0.162814	0.00433349	0.0110799		Dihydroxyacetone kinase, DhaK subunit OS=Escherichia coli (strain B / BL21-DE3) OX=469008 GN=ECBD_2422 PE=4 SV=1
1670	A0A140N3Q3	lldD	4	2	29	5	3	9.26177e-05	1.65512e-05	1.01531e-05		0.178704	0.109624	0.0369462	0.0263867	0.0107816		L-lactate dehydrogenase OS=Escherichia coli (strain B / BL21-DE3) OX=469008 GN=lldD PE=3 SV=1
1672	A0A140N9M6	gltI	3	3	24	4	3	0.000100507	1.73623e-05	1.33134e-05		0.172747	0.132462	0.0302738	0.0384573	0.00968544		Extracellular solute-binding protein family 3 OS=Escherichia coli (strain B / BL21-DE3) OX=469008 GN=ECBD_2996 PE=4 SV=1
1671	A0A140N7H1	vacJ	1	1	6	1	1	3.02321e-05	5.22252e-06	5.33949e-06		0.172747	0.176616	0.0537784	0.0669504	0.00968544		VacJ family lipoprotein OS=Escherichia coli (strain B / BL21-DE3) OX=469008 GN=ECBD_1311 PE=4 SV=1
1673	A0A140NCJ3	ydcH	1	1	6	1	2	0.000102544	1.77142e-05	3.6222e-05		0.172747	0.353233	0.351139	0.223524	0.00968544		Uncharacterized protein OS=Escherichia coli (strain B / BL21-DE3) OX=469008 GN=ECBD_2214 PE=4 SV=1
1674	A0A140ND67	rluA	1	1	6	1	1	3.46496e-05	5.98563e-06	6.11969e-06		0.172747	0.176616	0.0537784	0.0669504	0.00968544		Pseudouridine synthase OS=Escherichia coli (strain B / BL21-DE3) OX=469008 GN=ECBD_3559 PE=3 SV=1
1686	A0A140N753	malP	11	4	109	17	7	0.000172966	2.79605e-05	1.1771e-05		0.161653	0.068054	0.0233327	0.00989939	0.00783815		Alpha-1,4 glucan phosphorylase OS=Escherichia coli (strain B / BL21-DE3) OX=469008 GN=ECBD_0328 PE=3 SV=1
1676	A0A140NDU1	rihC	2	2	20	3	4	8.32047e-05	1.2936e-05	1.76344e-05		0.155473	0.21194	0.00433574	0.0938202	0.00691509		Non-specific ribonucleoside hydrolase RihC OS=Escherichia coli (strain B / BL21-DE3) OX=469008 GN=rihC PE=3 SV=1
1677	A0A140NBF8	artJ	3	1	20	3	1	0.000104091	1.61834e-05	5.51528e-06		0.155473	0.0529849	0.00433574	0.00583758	0.00691509		Cationic amino acid ABC transporter, periplasmic binding protein OS=Escherichia coli (strain B / BL21-DE3) OX=469008 GN=ECBD_2734 PE=3 SV=1
1678	A0A140N645	eco	3	2	27	4	4	0.000210785	3.23667e-05	3.30917e-05		0.153553	0.156992	0.0101414	0.0535133	0.00664344		Ecotin OS=Escherichia coli (strain B / BL21-DE3) OX=469008 GN=eco PE=3 SV=1
1679	A0A140N3B4	uxaC	2	1	14	2	1	3.76723e-05	5.5781e-06	2.85152e-06		0.148069	0.0756927	0.0869561	0.0123602	0.0059056		Uronate isomerase OS=Escherichia coli (strain B / BL21-DE3) OX=469008 GN=uxaC PE=3 SV=1
1680	A0A140NEN4	uxuR	1	1	7	1	1	3.44474e-05	5.10059e-06	5.21483e-06		0.148069	0.151385	0.0396405	0.0498937	0.0059056		Regulatory protein GntR HTH OS=Escherichia coli (strain B / BL21-DE3) OX=469008 GN=ECBD_3710 PE=4 SV=1
1681	A0A140NGC6	caiA	1	1	7	1	1	2.32973e-05	3.44961e-06	3.52687e-06		0.148069	0.151385	0.0396405	0.0498937	0.0059056		Crotonobetainyl-CoA reductase OS=Escherichia coli (strain B / BL21-DE3) OX=469008 GN=caiA PE=3 SV=1
1629	A0A140N9Z6	aldA	4	4	36	5	5	9.50514e-05	1.36832e-05	1.39897e-05		0.143956	0.14718	0.163914	0.0472466	0.00538869		Aldehyde Dehydrogenase OS=Escherichia coli (strain B / BL21-DE3) OX=469008 GN=ECBD_2225 PE=3 SV=1
1683	A0A140N8Q5	gatA	5	1	51	7	2	0.000430002	6.11731e-05	1.78695e-05		0.142262	0.0415568	0.00254316	0.00347372	0.00518473		Putative PTS IIA-like nitrogen-regulatory protein PtsN OS=Escherichia coli (strain B / BL21-DE3) OX=469008 GN=ECBD_1563 PE=4 SV=1
1684	A0A140N9Z8	fruB	2	1	23	3	4	7.73627e-05	1.04589e-05	1.42576e-05		0.135194	0.184295	0.089318	0.0725143	0.004388		Phosphocarrier, HPr family OS=Escherichia coli (strain B / BL21-DE3) OX=469008 GN=ECBD_1489 PE=4 SV=1
1685	A0A140N7P9	puuA	3	3	31	4	6	8.30637e-05	1.11089e-05	1.70366e-05		0.13374	0.205103	0.0178481	0.0883761	0.00423484		Glutamate--putrescine ligase OS=Escherichia coli (strain B / BL21-DE3) OX=469008 GN=ECBD_2320 PE=3 SV=1
1682	A0A140N730	raiA	3	2	131	15	11	0.00146617	0.000174007	0.000130463		0.118681	0.0889823	0.00357841	0.0172656	0.0028512		Sigma 54 modulation protein/ribosomal protein S30EA OS=Escherichia coli (strain B / BL21-DE3) OX=469008 GN=ECBD_1088 PE=4 SV=1
1646	A0A140N420	fucI	9	6	89	10	12	0.000190456	2.21802e-05	2.72124e-05		0.116459	0.142881	0.019563	0.0446013	0.00267686		L-fucose isomerase OS=Escherichia coli (strain B / BL21-DE3) OX=469008 GN=fucI PE=3 SV=1
1688	A0A140NBI1	artQ	1	2	9	1	5	4.78252e-05	5.50778e-06	2.81557e-05		0.115165	0.588721	0.592822	0.454378	0.00257872		Polar amino acid ABC transporter, inner membrane subunit OS=Escherichia coli (strain B / BL21-DE3) OX=469008 GN=ECBD_2732 PE=3 SV=1
1691	A0A140N870	gatD	4	3	70	7	5	0.000255866	2.65201e-05	1.93672e-05		0.103648	0.0756927	0.00579885	0.0123602	0.00180941		Alcohol dehydrogenase GroES domain protein OS=Escherichia coli (strain B / BL21-DE3) OX=469008 GN=ECBD_1566 PE=3 SV=1
1690	A0A140NAX0	ymdB	1	1	10	1	1	7.14526e-05	7.40595e-06	7.57182e-06		0.103648	0.10597	0.0191128	0.0246438	0.00180941		O-acetyl-ADP-ribose deacetylase OS=Escherichia coli (strain B / BL21-DE3) OX=469008 GN=ymdB PE=3 SV=1
1689	A0A140N679	fruK	1	1	10	1	1	4.05356e-05	4.20145e-06	4.29555e-06		0.103648	0.10597	0.0191128	0.0246438	0.00180941		Phosphofructokinase OS=Escherichia coli (strain B / BL21-DE3) OX=469008 GN=ECBD_1490 PE=3 SV=1
1692	A0A140SS66	yjbR	1	2	13	1	2	0.000139333	1.11089e-05	2.27155e-05		0.0797295	0.16303	0.0109917	0.0575232	0.000738007		Uncharacterized protein OS=Escherichia coli (strain B / BL21-DE3) OX=469008 GN=ECBD_3975 PE=4 SV=1
1693	A0A140N4B4	hslR	1	1	15	1	1	0.000142637	9.85603e-06	1.00768e-05		0.0690989	0.0706465	0.00809102	0.0107047	0.000449165		Heat shock protein 15 OS=Escherichia coli (strain B / BL21-DE3) OX=469008 GN=ECBD_0346 PE=3 SV=1
1694	A0A140N6E5	gatZ	4	1	133	7	1	0.000400492	2.18475e-05	3.19098e-06		0.0545518	0.00796766	6.21484e-05	9.3157e-05	0.000195938		D-tagatose-1,6-bisphosphate aldolase subunit GatZ OS=Escherichia coli (strain B / BL21-DE3) OX=469008 GN=gatZ PE=3 SV=1
