# Supplementary material for: Genome-wide effects of the antimicrobial peptide apidaecin on translation termination in bacteria
Source: eLife. 2020 Oct 8;9:e62655. doi: 10.7554/eLife.62655 (PMC7544508; doi:10.7554/eLife.62655)
Supplement: Source data 5. [file elife-62655-data5.xlsx]

## Sheet: RNA_seq_gene counts
gene	transcript per million average		fold change log2	qval
	control	Api
ECD_03932_yjcB	44.7085	394.57	3.14166	0.000255261
ECD_02111_yejG	100.399	769.079	2.93738	0.000255261
ECD_02180_arnC	209.619	32.1237	-2.70606	0.000255261
ECD_02183_arnT	109.704	20.0826	-2.4496	0.000255261
ECD_03049_yhbE	122.741	664.041	2.43565	0.000255261
ECD_01112_lolC	59.297	11.1129	-2.41572	0.000255261
ECD_04216_hsdR	41.009	8.17768	-2.32618	0.000255261
ECD_01876_yecA	43.5964	196.788	2.17436	0.000255261
ECD_03692_corA	61.3953	275.936	2.16813	0.000255261
ECD_03982_proP	19.7401	88.0909	2.15786	0.000255261
ECD_03040_secG	1639.5	6823.34	2.05722	0.000255261
ECD_03048_obgE	120.984	493.837	2.02921	0.000255261
ECD_03411_glyQ	405.829	99.9629	-2.02141	0.000255261
ECD_03270_malT	58.6416	14.6787	-1.9982	0.000255261
ECD_00058_lptD	109.105	28.7464	-1.92426	0.000255261
ECD_03310_rpoH	243.259	904.8	1.8951	0.000255261
ECD_01110_mfd	46.7292	12.7207	-1.87714	0.000255261
ECD_03509_recG	59.5976	16.6929	-1.83602	0.000255261
ECD_01080_rne	99.5774	28.3233	-1.81383	0.000255261
ECD_00097_lpxC	830.781	2866.86	1.78693	0.000255261
ECD_00628_ybeZ	155.854	46.8697	-1.73346	0.000255261
ECD_02211_nuoC	422.621	127.623	-1.72747	0.000255261
ECD_03104_tldD	116.872	36.7997	-1.66717	0.000255261
ECD_03046_greA	177.528	536.616	1.59584	0.000255261
ECD_00086_murE	164.769	56.1164	-1.55395	0.000255261
ECD_02181_arnA	234.231	80.6763	-1.53771	0.000255261
ECD_03664_wecB	136.701	47.7425	-1.51768	0.000255261
ECD_01265_fabI	1080.76	389.658	-1.47176	0.000255261
ECD_01683_pheS	306.742	117.964	-1.37868	0.000255261
ECD_00193_proS	461.612	180.863	-1.35178	0.000255261
ECD_02842_sslE	78.3294	30.7831	-1.34741	0.000255261
ECD_03841_ppc	88.692	35.17	-1.33446	0.000255261
ECD_03681_cyaA	87.4421	34.7751	-1.33027	0.000255261
ECD_03506_rpoZ	856.163	2135.81	1.31882	0.000255261
ECD_01263_rnb	168.531	67.7292	-1.31516	0.000255261
ECD_03891_metH	78.7576	31.6792	-1.31388	0.000255261
ECD_00182_dnaE	123.123	49.7968	-1.30598	0.000255261
ECD_00897_serS	322.138	130.796	-1.30037	0.000255261
ECD_03050_rpmA	5854.37	13269	1.18048	0.000255261
ECD_03051_rplU	5471.04	12213.7	1.15862	0.000255261
ECD_00014_dnaK	1162.96	528.131	-1.13883	0.000255261
ECD_02625_pyrG	625.421	298.372	-1.06772	0.000255261
ECD_00604_mrdA	53.2145	9.1994	-2.53221	0.000258648
ECD_04110_mgtA	19.7977	113.21	2.5156	0.000258648
ECD_00959_ycbZ	52.236	12.4736	-2.06616	0.000258648
ECD_01408_yncD	64.1111	16.8667	-1.9264	0.000258648
ECD_01051_yceA	103.834	35.8094	-1.53587	0.000258648
ECD_04277_arcA	231.588	648.548	1.48565	0.000258648
ECD_02641_sdaC	400.07	167.069	-1.25981	0.000258648
ECD_03779_fdoG	62.8183	145.224	1.20902	0.000258648
ECD_00099_secA	161.186	70.4748	-1.19355	0.000258648
ECD_00155_erpA	738.89	1601.85	1.11631	0.000258648
ECD_02549_recA	249.957	536.872	1.1029	0.000258648
ECD_02547_alaS	456.791	213.483	-1.09742	0.000258648
ECD_00928_mukB	90.5539	42.9628	-1.07569	0.000258648
ECD_03240_damX	280.288	135.427	-1.0494	0.000258648
ECD_03658_rhlB	241.719	85.4675	-1.49989	0.000263059
ECD_04020_sugE	111.756	414.663	1.89158	0.000272649
ECD_04136_intB	8.71436	43.5739	2.322	0.000282192
ECD_04384_yshB	568.88	2750.74	2.27362	0.000282192
ECD_00603_mrdB	56.285	12.6941	-2.14859	0.000282192
ECD_04076	30.5374	115.482	1.91902	0.000282192
ECD_00869_artP	110.913	32.2945	-1.78007	0.000282192
ECD_02085_lysP	99.6668	30.9804	-1.68576	0.000282192
ECD_00602_rlpA	96.9584	34.0387	-1.51019	0.000282192
ECD_03925_alr	94.5222	34.0748	-1.47195	0.000282192
ECD_02675_thyA	159.068	60.0339	-1.40579	0.000282192
ECD_00368_dxs	69.8323	27.2254	-1.35894	0.000282192
ECD_00036_carA	185.972	73.0394	-1.34834	0.000282192
ECD_00037_carB	179.396	70.8688	-1.33992	0.000282192
ECD_00443_ybbN	181.496	72.8549	-1.31684	0.000282192
ECD_03424_avtA	129.604	53.7513	-1.26974	0.000282192
ECD_00123_gcd	44.6066	106.11	1.25023	0.000282192
ECD_00916_ihfB	394.47	931.152	1.2391	0.000282192
ECD_01129_purB	153.809	68.7011	-1.16273	0.000282192
ECD_01931_gnd	446.406	229.789	-0.958044	0.000282192
ECD_01688_thrS	592.618	313.006	-0.92091	0.000282192
ECD_03032_rpsO	5923.47	10913.6	0.88161	0.000282192
ECD_00918_msbA	97.5872	43.6716	-1.16	0.000289756
ECD_00894_ftsK	55.1879	26.0568	-1.08269	0.000289756
ECD_00891_cydD	41.4025	11.1044	-1.89859	0.000298771
ECD_00384_ampG	61.1413	21.494	-1.50821	0.000298963
ECD_00424_htpG	337.041	179.332	-0.910293	0.000298963
ECD_02302_nupC	244.844	100.388	-1.28627	0.000301114
ECD_00935_pncB	149.674	66.0421	-1.18037	0.000304888
ECD_01611_slyB	625.787	1232.64	0.978006	0.000307458
ECD_04006_dsbD	31.7096	5.58824	-2.50445	0.000307935
ECD_02024_gatY	264.397	51.1379	-2.37024	0.000307935
ECD_00742_bioB	164.249	32.1228	-2.35422	0.000307935
ECD_03985_eptA	214.523	49.6657	-2.11081	0.000307935
ECD_03778_fdoH	27.148	103.211	1.92667	0.000307935
ECD_03510	87.6963	292.954	1.74009	0.000307935
ECD_03699_yigI	67.7782	218.242	1.68704	0.000307935
ECD_01656_ydiJ	35.6897	11.4424	-1.64112	0.000307935
ECD_03612_pstS	41.9702	114.919	1.45318	0.000307935
ECD_01046_opgH	97.4299	35.8738	-1.44143	0.000307935
ECD_01917_plaP	569.59	212.028	-1.42567	0.000307935
ECD_01437_maeA	78.051	31.1068	-1.32719	0.000307935
ECD_02505_bamE	201.138	489.69	1.28368	0.000307935
ECD_00087_murF	132.118	57.9433	-1.18911	0.000307935
ECD_03666_rffG	105.707	46.5497	-1.18322	0.000307935
ECD_02485_bamD	177.955	80.095	-1.15173	0.000307935
ECD_02160_nrdA	223.508	101.618	-1.13716	0.000307935
ECD_03036_nusA	483.608	1025.5	1.08442	0.000307935
ECD_03817_hslV	376.917	177.924	-1.08299	0.000307935
ECD_00142_pcnB	150.004	71.3822	-1.07136	0.000307935
ECD_02902_parE	128.671	63.8333	-1.01131	0.000307935
ECD_02418_hscA	271.732	135.408	-1.00487	0.000307935
ECD_03347_prlC	122.906	62.2017	-0.982529	0.000307935
ECD_01084_yceD	2250.26	4030.33	0.840808	0.000307935
ECD_02772_metK	507.784	286.452	-0.825921	0.000307935
ECD_04267_ettA	292.264	159.819	-0.870829	0.000312784
ECD_00626_ybeX	158.28	71.8197	-1.14003	0.000315463
ECD_03915_lexA	288.319	706.34	1.2927	0.000316851
ECD_03034_rbfA	248.149	538.585	1.11797	0.000316851
ECD_03665_wecC	123.375	59.2316	-1.05861	0.000316851
ECD_03267_gntT	203.182	103.6	-0.971751	0.000316851
ECD_00914_cmk	226.74	429.075	0.920189	0.000316851
ECD_02723_prfB	277.682	148.293	-0.904984	0.000316851
ECD_04272_rob	96.6729	213.436	1.14262	0.000320597
ECD_01599_rsxC	35.9424	12.0755	-1.5736	0.000320622
ECD_00428_gsk	73.1306	28.957	-1.33656	0.000320622
ECD_03614_glmU	400.091	224.499	-0.833619	0.000320822
ECD_01578_rstB	26.6812	4.97682	-2.42253	0.000322981
ECD_03924_dnaB	114.432	47.6616	-1.26359	0.000322981
ECD_01368_hrpA	35.8548	17.2146	-1.05853	0.000322981
ECD_00092_murC	142.78	69.906	-1.03031	0.000322981
ECD_03581_yidB	24.8208	125.819	2.34173	0.000323118
ECD_00685_sucA	618.213	184.091	-1.74769	0.000323118
ECD_01777_tsaB	102.902	31.347	-1.71487	0.000323118
ECD_02394_ppx	41.5025	13.4485	-1.62576	0.000323143
ECD_00365_thiL	66.4944	23.757	-1.48488	0.000323143
ECD_03824_metJ	211.806	499.163	1.23676	0.000323143
ECD_02400_guaB	432.697	196.753	-1.13697	0.000323143
ECD_03259_yhgF	99.4458	50.0533	-0.990446	0.000323143
ECD_03030_nlpI	425.378	730.057	0.779263	0.000323143
ECD_03494_rpmB	7622.14	12988.1	0.768924	0.000323143
ECD_00707_aroG	86.1237	34.9353	-1.30173	0.00032454
ECD_03508_trmH	123.548	38.0404	-1.69946	0.000325549
ECD_04124_valS	274.12	149.297	-0.876624	0.000327363
ECD_01671_ppsA	376.061	235.05	-0.678	0.000327363
ECD_00345_sbcC	18.8035	5.89564	-1.67328	0.000327432
ECD_02264_sixA	203.456	399.172	0.972291	0.000336924
ECD_04319_yneM	211.853	2123.8	3.32551	0.000336953
ECD_02676_lgt	121.078	35.0299	-1.78928	0.000339132
ECD_03553_uhpA	56.4868	157.227	1.47686	0.000339132
ECD_03855_coaA	48.3744	13.9108	-1.79804	0.00033958
ECD_04029_mscM	18.947	7.14051	-1.40787	0.00033958
ECD_03472_yibQ	145.531	63.998	-1.18523	0.00034228
ECD_02870_hybC	154.181	86.7904	-0.82902	0.00034228
ECD_03586_rpmH	11062.7	18513.2	0.742848	0.00034228
ECD_03661_rho	1170.41	610.768	-0.938314	0.000346467
ECD_01045_opgG	82.7614	13.8246	-2.58172	0.000347447
ECD_03503_yicG	15.334	76.3191	2.31531	0.000347447
ECD_02055_yehU	21.8384	5.04094	-2.1151	0.000347447
ECD_04388_pmrR	5624.63	21857.2	1.95828	0.000347447
ECD_02064_pbpG	58.0855	18.2516	-1.67015	0.000347447
ECD_01186_prfA	85.5311	29.2445	-1.54828	0.000347447
ECD_00681_sdhC	221.315	77.0376	-1.52246	0.000347447
ECD_00868_artI	130.881	53.0009	-1.30417	0.000347447
ECD_00802_rimO	95.7452	46.7474	-1.03431	0.000347447
ECD_00911_serC	214.694	118.046	-0.862936	0.000347447
ECD_03801_pfkA	140.272	254.252	0.858031	0.000347447
ECD_03466_gpsA	259.131	146.671	-0.821097	0.000347447
ECD_00907_pflB	313.572	187.858	-0.739156	0.000347447
ECD_02468_nadB	75.6839	31.5689	-1.26148	0.00035002
ECD_02213_nuoA	330.362	147.097	-1.16728	0.00035002
ECD_02044_metG	147.325	78.6403	-0.905664	0.00035002
ECD_03557_emrD	31.2966	74.7175	1.25544	0.000356246
ECD_00611_leuS	248.083	157.648	-0.654112	0.000357586
ECD_02399_guaA	595.74	283.921	-1.06919	0.000358049
ECD_02479_pssA	89.3581	42.2461	-1.08078	0.000360763
ECD_00323_ampH	29.9128	6.36009	-2.23364	0.000362854
ECD_02838	20.38	5.33183	-1.93445	0.000362854
ECD_01122_potC	84.2152	29.1792	-1.52914	0.000362854
ECD_04014_yjeI	138.557	396.912	1.51834	0.000362854
ECD_00761_ybhF	34.3165	12.1791	-1.49449	0.000362854
ECD_02021_gatZ	205.557	77.054	-1.4156	0.000362854
ECD_01691_ydiY	154.736	75.4813	-1.03561	0.000362854
ECD_00349_brnQ	125.098	67.0864	-0.898962	0.000362854
ECD_00787_ybiT	141.871	83.1539	-0.770729	0.000362854
ECD_03816_hslU	380.448	223.736	-0.765899	0.000362854
ECD_02306_gltX	355.091	211.605	-0.746816	0.000362854
ECD_03031_pnp	448.66	284.288	-0.65827	0.000362854
ECD_03106_rng	64.3445	23.8097	-1.43427	0.00037008
ECD_00118_yacL	114.279	287.626	1.33163	0.00037008
ECD_01178_ychF	262.622	157.162	-0.740734	0.00037008
ECD_02681_ygdR	49.8888	246.01	2.30193	0.000371101
ECD_01748_gapA	1754.66	987.467	-0.829386	0.000371101
ECD_02244_usg	256.73	441.626	0.782571	0.000371101
ECD_01349_pfo	55.4862	32.3281	-0.779337	0.000371101
ECD_02449_purL	87.4119	52.1509	-0.745137	0.000371101
ECD_03118_dusB	636.131	1046.37	0.718003	0.000371101
ECD_01121_potD	130.961	59.7491	-1.13214	0.000377386
ECD_01801_prc	164.865	84.9224	-0.957064	0.00038629
ECD_02408_rodZ	127.979	66.939	-0.934989	0.00038629
ECD_02178_ais	368.203	200.217	-0.878935	0.00038629
ECD_02161_nrdB	205.229	115.02	-0.835354	0.00038629
ECD_00725_ybhC	104.463	42.1396	-1.30974	0.000390107
ECD_01190_kdsA	240.994	130.455	-0.885448	0.000390348
ECD_01486_marC	15.584	61.8101	1.98778	0.000396461
ECD_03199_slyX	88.2877	329.104	1.89826	0.000406828
ECD_01055_solA	47.887	14.3697	-1.7366	0.000407488
ECD_02238_cvpA	141.276	282.716	1.00084	0.000407488
ECD_02758_epd	126.794	64.9318	-0.96549	0.000407488
ECD_01017_putA	42.8472	23.5553	-0.863148	0.000407488
ECD_04102_yjgA	177.158	346.154	0.966378	0.000413878
ECD_01150_minD	171.979	94.7323	-0.860304	0.000413878
ECD_03587_rnpA	978.729	1748.71	0.837312	0.000413878
ECD_01607_tyrS	408.283	263.957	-0.629262	0.000413878
ECD_01735_sppA	38.3739	14.8541	-1.36926	0.000415228
ECD_01497_dcp	28.6131	12.1048	-1.2411	0.000415228
ECD_03139_rsmB	69.285	31.1349	-1.15401	0.000415228
ECD_03672_wzyE	30.9848	10.2303	-1.59872	0.00041628
ECD_03105_yhdP	17.9965	6.34706	-1.50356	0.00041628
ECD_02668_recB	27.0472	11.44	-1.24139	0.00041628
ECD_00609_holA	78.0948	33.9457	-1.202	0.00041628
ECD_02789_yggL	211.198	464.273	1.13638	0.00041628
ECD_03140_trkA	72.8855	34.0374	-1.09851	0.00041628
ECD_03755_glnA	102.848	48.5023	-1.08439	0.00041628
ECD_01208_purU	135.94	71.1712	-0.933605	0.00041628
ECD_03248_mrcA	66.12	36.6887	-0.849751	0.00041628
ECD_00061_rapA	102.25	61.6136	-0.730774	0.00041628
ECD_03914_dgkA	284.363	519.375	0.869045	0.000416805
ECD_04251_osmY	10.8096	65.6658	2.60283	0.000416849
ECD_02120_narP	31.0618	84.0828	1.43667	0.000416849
ECD_03380_bcsB	30.6913	12.649	-1.2788	0.000416849
ECD_01381_opgD	36.6143	15.8566	-1.20732	0.000416849
ECD_02742_zapA	243.617	530.458	1.12262	0.000416849
ECD_02871_hybB	120.683	62.0508	-0.959696	0.000416849
ECD_03913_plsB	70.771	32.904	-1.10489	0.000418163
ECD_03645_ilvL	8175.96	4515.95	-0.856358	0.000418163
ECD_02815	95.7725	21.5702	-2.15057	0.000419739
ECD_01123_potB	80.1112	35.5086	-1.17384	0.000420358
ECD_02818	98.7858	48.0112	-1.04093	0.000420358
ECD_00416_mscK	30.2525	16.0031	-0.918701	0.000420358
ECD_01818_yebF	62.5397	205.043	1.71308	0.000424775
ECD_01021_efeB	71.6522	35.8188	-1.00029	0.000424775
ECD_00113_aceE	2500.15	1444.19	-0.791752	0.000424775
ECD_02543_gshA	140.144	86.2003	-0.70115	0.000424775
ECD_03143_zntR	24.7944	90.4429	1.86699	0.000433088
ECD_03256_envZ	79.8594	140.168	0.811627	0.000433088
ECD_02222_pta	547.137	295.99	-0.886351	0.000436665
ECD_00625_lnt	59.643	24.159	-1.30379	0.000444103
ECD_01604_dtpA	114.432	58.6625	-0.963986	0.000444103
ECD_01182_prs	1011.97	670.232	-0.594429	0.000444103
ECD_00204_mltD	125.549	333.913	1.41123	0.00044491
ECD_03406_cspA	11370.8	28254	1.31313	0.000445684
ECD_00774_rlmF	38.6346	86.2607	1.15881	0.000445684
ECD_01487	30.4036	167.72	2.46374	0.00044593
ECD_03598_adeP	266.783	174.807	-0.609901	0.00044593
ECD_00576_uspG	14.4664	78.2915	2.43615	0.000446938
ECD_02677_ptsP	52.3627	25.8006	-1.02113	0.000446938
ECD_03070_yhbJ	96.2697	48.0108	-1.00372	0.000446938
ECD_01151_minC	97.568	41.6899	-1.22671	0.000458186
ECD_03490_waaA	35.9248	13.8317	-1.377	0.000458728
ECD_02795_speC	55.3905	24.1261	-1.19904	0.000458728
ECD_01020_efeO	82.2175	40.6091	-1.01764	0.000458728
ECD_01217_oppA	60.3744	30.0725	-1.00549	0.000458728
ECD_03410_glyS	384.627	214.963	-0.839372	0.000458728
ECD_03858_nusG	1028.61	1823.19	0.825765	0.000458728
ECD_01268_sapD	26.9245	4.52837	-2.57186	0.000459729
ECD_03687_xerC	70.576	23.147	-1.60835	0.000459729
ECD_03095_degS	41.0743	15.0516	-1.44832	0.000459729
ECD_01673_aroH	61.6476	23.5845	-1.3862	0.000459729
ECD_02728_cptA	86.8787	195.232	1.16811	0.000459729
ECD_03075_arcB	27.6386	12.8247	-1.10776	0.000459729
ECD_03813_zapB	686.642	1377.55	1.00447	0.000459729
ECD_04103_pmbA	65.2432	33.0393	-0.981642	0.000459729
ECD_03060_mlaF	117.19	209.44	0.837681	0.000459729
ECD_03623_atpI	541.298	949.342	0.810503	0.000459729
ECD_01583_ydgA	63.2398	24.1775	-1.38717	0.000462487
ECD_00172_ispU	156.366	282.801	0.854863	0.00046309
ECD_00936_pepN	76.1968	42.2823	-0.849677	0.000465453
ECD_03643_yifE	1141.79	2482.92	1.12074	0.000467101
ECD_03705_yigL	78.6971	24.4704	-1.68527	0.000469364
ECD_01249_yciN	154.723	395.269	1.35315	0.000469364
ECD_00934_asnS	481.402	302.869	-0.668547	0.000469364
ECD_02243_truA	222.065	350.492	0.658399	0.000469364
ECD_03734_ubiD	144.39	86.3356	-0.74194	0.000471053
ECD_00096_ftsZ	351.272	524.569	0.578545	0.000471053
ECD_01969_yegH	22.2895	7.06738	-1.65712	0.000473389
ECD_01612_slyA	53.481	136.963	1.35669	0.000473389
ECD_03250_yrfF	29.0127	13.4645	-1.10753	0.000473389
ECD_01352_ldhA	96.5367	162.691	0.752986	0.000473389
ECD_00052_folA	129.554	249.588	0.945991	0.000473458
ECD_02455_yfhH	9.26614	40.6915	2.13469	0.000474163
ECD_02465_rseB	73.4521	34.9721	-1.0706	0.000474864
ECD_04013_groL	1882.01	1226.06	-0.618244	0.000474864
ECD_03029_deaD	245.238	371.687	0.599907	0.000475528
ECD_00111_aroP	53.5188	26.248	-1.02784	0.000476237
ECD_03142_arfA	53.1663	526.511	3.30788	0.000476321
ECD_02928_folB	59.366	180.372	1.60327	0.000476321
ECD_03918_zur	32.5682	94.2535	1.53308	0.000476321
ECD_02249_mnmC	23.5607	8.24277	-1.51518	0.000476321
ECD_02595_truD	132.13	61.4311	-1.10492	0.000476321
ECD_00608_nadD	45.3211	12.9361	-1.80878	0.000482534
ECD_00359_tsx	218.86	129.233	-0.760033	0.000489117
ECD_03701_recQ	43.8069	20.2263	-1.11493	0.000492171
ECD_01877_pgsA	72.2725	21.3713	-1.75778	0.00049878
ECD_03840_eptC	298.838	109.391	-1.44987	0.000499329
ECD_02105_mepS	325.136	189.27	-0.780599	0.000500726
ECD_01813_holE	62.9765	225.018	1.83715	0.000500958
ECD_00002_thrA	152.89	58.3773	-1.38902	0.000500958
ECD_03027_yhbW	87.0399	45.8137	-0.925897	0.00050211
ECD_03872_rsd	62.1978	142.819	1.19925	0.000510794
ECD_03446_selA	44.1866	14.1693	-1.64083	0.000510998
ECD_03381_bcsA	25.4706	9.01658	-1.49818	0.000510998
ECD_02475_yfiF	164.647	285.564	0.794432	0.000510998
ECD_03555_ilvB	37.1263	13.3942	-1.47083	0.000513269
ECD_00892_trxB	506.238	346.413	-0.547324	0.000514113
ECD_02393_ppk	28.6015	13.6225	-1.0701	0.000521749
ECD_01187_prmC	58.1318	23.0244	-1.33617	0.000523702
ECD_03456_mtlR	35.1986	99.9948	1.50633	0.000531443
ECD_03037_rimP	479.785	1097.34	1.19354	0.000533165
ECD_00508_rzpD	301.145	556.734	0.886531	0.000544769
ECD_01732_topB	41.2667	22.4038	-0.881234	0.000544769
ECD_02422_iscS	418.017	281.336	-0.571271	0.000544769
ECD_02057_yohO	527.478	2176.46	2.0448	0.000548325
ECD_01819_yebG	58.9014	211.983	1.84757	0.000548325
ECD_03644_yifB	5.57278	19.9463	1.83965	0.000548325
ECD_03209_yhfK	31.9203	13.4747	-1.24422	0.000548325
ECD_02693_yqeG	32.4836	13.8988	-1.22475	0.000548325
ECD_01092_pabC	32.8597	75.5902	1.20188	0.000548325
ECD_00175_bamA	257.515	119.229	-1.11092	0.000548325
ECD_00867_artQ	119.42	55.3095	-1.11045	0.000548325
ECD_01948_wcaN	94.6589	44.4732	-1.0898	0.000548325
ECD_00342_rdgC	51.0425	104.495	1.03367	0.000548325
ECD_03751_yihI	133.533	265.682	0.992498	0.000548325
ECD_03847_sthA	144.633	82.9086	-0.802799	0.000548325
ECD_03392_dppD	121.427	70.3755	-0.786938	0.000548325
ECD_04040_hflX	201.835	129.063	-0.645098	0.000548325
ECD_01682_pheT	313.806	218.006	-0.525505	0.000548325
ECD_01972_udk	107.271	52.8806	-1.02045	0.000548557
ECD_02874_yghW	246.04	720.013	1.54913	0.000550423
ECD_01563_mlc	38.3273	15.1258	-1.34136	0.000550423
ECD_03505_gmk	214.751	368.089	0.777388	0.000550423
ECD_00601_dacA	124.439	39.6394	-1.65044	0.000550727
ECD_02729_sdhE	88.3974	243.692	1.46299	0.000554108
ECD_03098_yhcN	102.255	523.066	2.35483	0.000556106
ECD_03190_tufA	7568.9	4810.22	-0.653982	0.000556544
ECD_00030_ileS	314.142	214.885	-0.547852	0.000556544
ECD_02369_bamC	264.63	423.262	0.677573	0.000561944
ECD_02594_umpG	113.459	44.0629	-1.36454	0.000563289
ECD_01096_ycfH	94.7787	41.4159	-1.19438	0.000563289
ECD_03377_yhjK	20.6689	8.37142	-1.30392	0.000563704
ECD_03257_ompR	152.322	303.382	0.994011	0.000563704
ECD_01085_rpmF	7328.69	11070.1	0.595045	0.000563704
ECD_01823_zwf	167.606	109.948	-0.608253	0.000565986
ECD_03241_aroB	268.801	181.191	-0.569026	0.000570558
ECD_01184_lolB	53.0737	18.1276	-1.54981	0.000571553
ECD_03580_yidA	87.6792	46.6588	-0.910085	0.000571553
ECD_03843_argC	82.9966	45.0791	-0.880594	0.000571553
ECD_00640_fur	452.014	847.534	0.906906	0.000574758
ECD_04113_pyrB	57.1134	23.0717	-1.3077	0.000581119
ECD_00909_ycaO	101.579	55.8818	-0.862158	0.000583049
ECD_03237_gph	139.597	79.2689	-0.816436	0.000583049
ECD_03582_gyrB	202.843	141.757	-0.51694	0.000583049
ECD_02137_mqo	164.541	109.804	-0.583524	0.000589302
ECD_00386_bolA	104.584	233.563	1.15915	0.000595414
ECD_02727_fldB	110.562	206.116	0.898602	0.000595414
ECD_00627_ybeY	194.98	106.894	-0.867146	0.000595414
ECD_02757_pgk	472.992	307.96	-0.619073	0.000596658
ECD_00703_nadA	114.467	70.3492	-0.702329	0.000597587
ECD_00973_tusE	56.8094	140.835	1.30981	0.000600653
ECD_02788_yggN	39.4771	93.1335	1.23828	0.000600653
ECD_01393_ydcP	43.8423	23.3685	-0.907758	0.000600653
ECD_02470_srmB	63.3427	34.1962	-0.889343	0.000600653
ECD_03384_bcsE	22.9974	9.26035	-1.31233	0.00060102
ECD_00882_ybjX	125.885	77.9157	-0.69212	0.00060102
ECD_02145_rcsC	18.9216	6.07863	-1.63821	0.00060199
ECD_04010_fxsA	86.3919	28.8188	-1.58388	0.00060199
ECD_02501_yfjD	38.9789	13.7805	-1.50006	0.00060199
ECD_03395_dppA	33.1526	13.91	-1.253	0.00060199
ECD_01403_ydcY	165.213	392.997	1.25019	0.00060199
ECD_02253_mepA	69.8524	35.3363	-0.983157	0.00060199
ECD_02062_bglX	49.6013	25.8153	-0.942151	0.00060199
ECD_02756_fbaA	977.673	518.853	-0.914027	0.00060199
ECD_00291_codA	76.4977	45.0618	-0.76351	0.00060199
ECD_00183_accA	555.4	379.359	-0.549964	0.00060199
ECD_00246_yagU	60.9505	22.3887	-1.44487	0.00060441
ECD_02640_ygdH	53.5943	26.1937	-1.03286	0.000605218
ECD_03688_yigB	64.0487	20.7256	-1.62776	0.00060579
ECD_02290_ypdA	12.7017	3.34254	-1.92601	0.000606151
ECD_01220_oppD	53.5221	23.9869	-1.15789	0.000606151
ECD_04128_lptG	110.342	184.158	0.738968	0.000606151
ECD_03089_sspA	620.926	902.434	0.5394	0.000606151
ECD_00179_lpxA	470.867	671.916	0.51296	0.000606151
ECD_01791_mntP	26.0827	69.1839	1.40734	0.000608873
ECD_02816	128.541	33.1647	-1.95451	0.000610088
ECD_01634_mdtK	15.8723	35.0777	1.14404	0.000610088
ECD_03312_ftsE	139.175	229.454	0.7213	0.000610088
ECD_03857_secE	1098.54	1648.7	0.585745	0.000610088
ECD_03172_rpsJ	9993.97	14949.2	0.58094	0.000610088
ECD_04182_fimE	8.07026	36.7282	2.1862	0.000619478
ECD_00181_rnhB	93.1828	42.6737	-1.12672	0.000619716
ECD_02138_yojI	15.0664	4.74183	-1.66782	0.000621774
ECD_03526	781.142	1696.26	1.1187	0.000621774
ECD_02240_folC	129.253	75.6538	-0.77271	0.000621949
ECD_02593_pcm	101.92	48.8296	-1.06161	0.000622258
ECD_02923_glnE	46.3029	28.9478	-0.677651	0.000622258
ECD_01317_smrA	24.0324	66.6746	1.47216	0.00062841
ECD_03896_lysC	48.6963	26.0561	-0.902192	0.00062841
ECD_01082_rluC	79.7818	44.4539	-0.843749	0.000632389
ECD_03054_murA	238.575	163.612	-0.54416	0.000639121
ECD_01802_proQ	700.307	476.012	-0.556988	0.000639959
ECD_02790_trmI	140.143	227.949	0.701807	0.000645371
ECD_03667_rffH	105.81	46.4247	-1.18852	0.000647356
ECD_03493_rpmG	8492.47	13991	0.720246	0.000647356
ECD_01632_cfa	101.827	62.9753	-0.693262	0.000647356
ECD_02546_csrA	1272.52	1947.26	0.613759	0.000647356
ECD_02157_gyrA	289.363	208.898	-0.470082	0.000655499
ECD_02820	13.8503	34.5626	1.31929	0.000657159
ECD_04338_ypdK	221.15	1906.81	3.10806	0.000660934
ECD_01600_rsxD	36.3662	7.59586	-2.25931	0.00066879
ECD_04236_opgB	40.5268	23.501	-0.786154	0.00066879
ECD_02063_dld	34.7738	17.2854	-1.00845	0.000670168
ECD_02540_emrA	50.9883	20.728	-1.29858	0.000674421
ECD_02215_alaA	142.25	59.9198	-1.24732	0.000674421
ECD_04264_serB	116.765	72.6901	-0.683776	0.000674421
ECD_00636_nagE	73.216	45.6361	-0.681984	0.000674421
ECD_01921_hisG	30.8799	10.6687	-1.53328	0.000676375
ECD_03727_ubiJ	147.7	240.091	0.700911	0.000684834
ECD_03378_bcsC	30.9411	10.6543	-1.53809	0.00069663
ECD_01675_ydiU	44.7946	23.9606	-0.902663	0.00069663
ECD_00173_cdsA	151.731	250.104	0.721017	0.00069663
ECD_01914_sbcB	18.317	5.78168	-1.66362	0.000698874
ECD_03804_tpiA	467.61	258.304	-0.856237	0.000726596
ECD_00933_ompF	11515.4	6936.68	-0.731247	0.000726596
ECD_03214_ppiA	268.242	172.969	-0.633023	0.000726596
ECD_03828_katG	99.6292	68.724	-0.535755	0.000726596
ECD_02498_rpsP	5240.67	7579.99	0.532444	0.000726596
ECD_02765_tktA	532.99	258.776	-1.0424	0.000731905
ECD_01837_aspS	224.925	133.53	-0.752285	0.000731905
ECD_03066_lptB	139.856	84.4802	-0.727253	0.000731905
ECD_02406_hisS	246.809	167.186	-0.56194	0.000731905
ECD_02390_upp	323.936	705.929	1.12381	0.000734811
ECD_04126_pepA	192.136	265.992	0.469254	0.000736804
ECD_00232_pepD	244.161	127.566	-0.936583	0.000737436
ECD_01219_oppC	48.3969	23.5548	-1.0389	0.000740113
ECD_00144_dksA	698.8	1060.07	0.601207	0.000746331
ECD_00009_mog	102.159	173.596	0.764918	0.000750153
ECD_02020_gatA	129.174	64.801	-0.995231	0.000751772
ECD_04087_ytfJ	27.036	64.9591	1.26465	0.000755051
ECD_04021_blc	21.1302	115.337	2.44848	0.000755491
ECD_01841_cmoA	61.5642	29.6602	-1.05356	0.000755491
ECD_00890_cydC	39.8481	22.6221	-0.81678	0.000755491
ECD_03090_rpsI	7419.58	10431.7	0.491571	0.000755491
ECD_03859_rplK	6472.93	9078.2	0.487987	0.000755491
ECD_02371_gcvR	51.5739	15.1866	-1.76384	0.000757376
ECD_03067_rpoN	108.1	61.6456	-0.810303	0.000757376
ECD_02722_lysS	371.009	270.078	-0.458075	0.000757376
ECD_02032_thiM	51.9943	22.6657	-1.19784	0.000759035
ECD_01222_yciU	104.437	206.839	0.98587	0.000759035
ECD_04030_psd	54.8832	28.4491	-0.947981	0.000759035
ECD_01975_yegD	33.8138	59.5247	0.815878	0.000767995
ECD_03669_wecE	86.1897	45.2538	-0.929476	0.000769396
ECD_02225_yfcE	113.521	197.075	0.795792	0.000769396
ECD_01631_ydhC	62.7617	36.9788	-0.763185	0.000769396
ECD_04299_mntS	185.557	757.921	2.03018	0.000773582
ECD_01218_oppB	36.7875	12.361	-1.57342	0.000773582
ECD_00762_ybhG	42.6967	17.1098	-1.3193	0.000773582
ECD_00194_tsaA	76.875	38.9473	-0.980993	0.000773582
ECD_02176_yfaZ	57.0951	130.02	1.18729	0.000774475
ECD_01065_murJ	39.6259	18.7524	-1.07937	0.000774475
ECD_01778_yoaA	22.6386	10.8337	-1.06326	0.000774475
ECD_01160_dsbB	78.6393	155.016	0.979094	0.000774475
ECD_02208_nuoG	448.487	286.433	-0.646869	0.000774475
ECD_03114_accC	934.717	682.892	-0.452871	0.000774475
ECD_02903_yqiA	114.874	64.7018	-0.82817	0.000778729
ECD_01253_acnA	30.0071	18.1934	-0.721887	0.000778729
ECD_04246_rsmC	96.4471	150.99	0.646643	0.00078372
ECD_00374_yajQ	343.4	510.186	0.571134	0.000785331
ECD_02212_nuoB	479.008	284.397	-0.752145	0.000785423
ECD_03261_feoB	20.0769	9.97189	-1.0096	0.000785711
ECD_02526_alaE	6.24631	35.5512	2.50882	0.000809851
ECD_00438_cueR	30.0787	90.7463	1.5931	0.000809851
ECD_03108_mreD	128.255	67.6025	-0.923867	0.000809851
ECD_04266_nadR	52.766	30.1988	-0.805116	0.000816817
ECD_00597_lipA	404.668	302.817	-0.418294	0.000816956
ECD_00896_rarA	44.2801	22.1206	-1.00127	0.000820442
ECD_01267_sapF	25.9742	9.28119	-1.4847	0.000821953
ECD_00015_dnaJ	363.484	263.24	-0.465514	0.000828753
ECD_03864_rpoC	976.721	711.482	-0.457119	0.000839724
ECD_04390_mgtL	825.391	3647.49	2.14375	0.000841716
ECD_04078_ytfB	44.6396	87.9865	0.978959	0.000841716
ECD_00356_secD	358.93	206.859	-0.795055	0.000841716
ECD_02201_nuoN	357.562	236.339	-0.597333	0.000841716
ECD_03856_tufB	6085	8867.49	0.543269	0.000841716
ECD_02937_rpoD	359.623	275.16	-0.38621	0.000841716
ECD_03203_yheS	55.9748	33.7214	-0.731114	0.000845227
ECD_03144_yhdN	22.079	69.676	1.65798	0.000845306
ECD_02446_glrR	24.8572	9.95259	-1.32052	0.00084645
ECD_02104_lpxT	71.557	34.2525	-1.06289	0.000847442
ECD_02112_bcr	44.6382	23.2217	-0.942804	0.000847442
ECD_02256_smrB	25.3561	58.8199	1.21397	0.000848739
ECD_00081_cra	82.7764	51.4048	-0.687318	0.000848942
ECD_00108_nadC	37.6944	16.6298	-1.18058	0.000850312
ECD_02737_gcvT	107.029	50.7032	-1.07786	0.000852268
ECD_01353_ydbH	11.0942	3.0553	-1.86042	0.000855729
ECD_01786_yoaE	23.3226	10.5692	-1.14186	0.000855729
ECD_00949_pyrD	53.2742	27.7394	-0.9415	0.000855729
ECD_02630_rlmD	39.1816	21.7566	-0.848723	0.000855729
ECD_04032_orn	95.63	171.6	0.843515	0.000855729
ECD_03749_polA	67.1962	46.2393	-0.539261	0.000855729
ECD_03088_sspB	663.203	920.938	0.473654	0.000855729
ECD_00057_surA	184.508	115.889	-0.670938	0.000857848
ECD_03852_murI	88.0616	50.2208	-0.810227	0.000864261
ECD_03863_rpoB	815.104	501.642	-0.700327	0.000864261
ECD_03236_trpS	287.415	198.904	-0.531062	0.000864261
ECD_01647_ldtE	4.76166	20.2129	2.08574	0.000867127
ECD_03660_rhoL	6503.54	4059.03	-0.68009	0.000883745
ECD_03511_gltS	208.646	474.854	1.18643	0.000888978
ECD_00056_pdxA	105.989	57.4662	-0.883123	0.000888978
ECD_02733_bglA	46.6147	25.1832	-0.888325	0.000889116
ECD_03045_yhbY	652.027	956.19	0.552366	0.000889116
ECD_00955_pqiB	43.285	25.0443	-0.789385	0.000890113
ECD_01215_adhE	58.7222	38.8679	-0.595327	0.000895889
ECD_00413_acrB	197.598	143.836	-0.458143	0.000895952
ECD_02626_mazG	53.9107	27.7441	-0.958389	0.000903762
ECD_04239_dnaT	46.8291	101.308	1.11327	0.000904365
ECD_03023_yhbS	83.311	166.024	0.994809	0.000905894
ECD_01488	25.1197	84.7042	1.75361	0.000908262
ECD_00418_priC	29.8145	72.1636	1.27526	0.000908262
ECD_00692_cydA	132.93	65.2702	-1.02617	0.000908262
ECD_02817	208.345	137.486	-0.599689	0.000908262
ECD_01608_pdxH	69.011	25.2884	-1.44835	0.000908479
ECD_02735_gcvP	80.7964	44.4104	-0.863395	0.000908479
ECD_01871_yecJ	46.5612	146.556	1.65425	0.000918148
ECD_02110_yejF	16.3546	33.3565	1.02827	0.000918148
ECD_03497_dut	281.007	451.76	0.684953	0.000918148
ECD_00760_ybhS	22.0964	8.14608	-1.43964	0.000943696
ECD_01581_fumA	99.0129	42.6198	-1.21609	0.000949547
ECD_01945_rfbA	79.0764	121.729	0.622357	0.000954255
ECD_00796_gsiA	15.2467	4.54252	-1.74693	0.000957899
ECD_01726_ynjE	15.3747	5.12699	-1.58438	0.00096046
ECD_00001_thrL	4161.49	2259.93	-0.88082	0.00096046
ECD_03024_yhbT	80.9248	137.334	0.76303	0.00096046
ECD_03823_yiiX	18.6021	51.8972	1.48019	0.00096237
ECD_00164_dapD	404.529	296.73	-0.447089	0.000968867
ECD_02210_nuoE	591.9	414.757	-0.513086	0.000971945
ECD_01805_yebT	15.7707	7.75171	-1.02466	0.000975153
ECD_00599_lipB	70.7879	37.7028	-0.908831	0.000975153
ECD_01298_ycjX	30.5412	5.61033	-2.4446	0.000978207
ECD_03141_mscL	98.2265	170.419	0.794905	0.000978207
ECD_03109_mreC	157.713	101.857	-0.630762	0.000978207
ECD_02419_hscB	207.789	134.506	-0.627451	0.000978207
ECD_02891_parC	90.7151	65.9936	-0.459017	0.000978207
ECD_01185_hemA	62.0546	33.6805	-0.881623	0.000993538
ECD_02864_gss	39.9619	24.4562	-0.708425	0.000993538
ECD_01776_yeaY	76.2386	38.635	-0.980612	0.000994483
ECD_00369_ispA	79.8653	41.6631	-0.9388	0.00100098
ECD_04012_groS	2132.25	1321.34	-0.690371	0.00100098
ECD_02583_mutS	49.8594	32.8825	-0.600546	0.00100098
ECD_02115_rplY	2168.57	3851.98	0.828855	0.00100294
ECD_03348_rlmJ	63.4542	35.3644	-0.843418	0.0010105
ECD_03590_mnmE	101.911	70.074	-0.540364	0.0010105
ECD_03092_zapE	34.2107	17.0335	-1.00607	0.00101082
ECD_02631_barA	10.7761	5.2927	-1.02576	0.00101428
ECD_01899_ldtA	8.29979	22.9882	1.46975	0.00101448
ECD_00060_rluA	101.215	173.593	0.778285	0.00101448
ECD_00958_fabA	654.605	509.208	-0.36237	0.00101448
ECD_03133_tsaC	101.32	48.0818	-1.07536	0.00101652
ECD_03814_rraA	363.834	757.999	1.05892	0.00101652
ECD_03583_recF	75.7704	40.5991	-0.900185	0.00101652
ECD_02755_mscS	95.4919	150.823	0.659405	0.00102474
ECD_01626_sodB	538.848	408.114	-0.400906	0.00102474
ECD_01490_marA	50.6197	121.329	1.26115	0.00102769
ECD_04093_ytfP	198.382	336.782	0.763536	0.00102989
ECD_03646_ilvG	77.9238	46.32	-0.750429	0.00102989
ECD_04265_radA	86.5892	58.4552	-0.566855	0.00102989
ECD_00574_ahpC	1796.02	1380.51	-0.379601	0.00102989
ECD_01930_ugd	129.76	82.2865	-0.657116	0.00103282
ECD_03478_waaC	63.0036	37.8067	-0.736791	0.00103975
ECD_00177_lpxD	487.928	337.497	-0.531792	0.00104103
ECD_03883_purH	67.1351	40.7962	-0.718632	0.00105026
ECD_03794_sodA	1172.61	884.594	-0.406639	0.00105026
ECD_01402_ydcX	52.9947	212.364	2.00262	0.00105105
ECD_03738_pepQ	105.994	69.7309	-0.604111	0.00105717
ECD_02663_tcdA	75.3345	124.646	0.726452	0.00105747
ECD_02202_nuoM	315.09	190.584	-0.725339	0.00105747
ECD_02953_rlmG	44.4287	73.1168	0.71871	0.00105842
ECD_02496_trmD	3368.43	4471.83	0.408786	0.00105958
ECD_01044_opgC	10.3979	2.09384	-2.31207	0.00106069
ECD_00119_speD	141.795	87.4183	-0.697798	0.00106069
ECD_02203_nuoL	400.238	264.835	-0.595767	0.00106069
ECD_01124_potA	82.3397	37.3467	-1.14061	0.00107404
ECD_02220_yfbV	34.8898	80.8856	1.21308	0.0010744
ECD_01970_asmA	52.2556	31.907	-0.711714	0.00107516
ECD_02924_ygiF	60.8915	38.6171	-0.657001	0.00107516
ECD_04217_mrr	26.0074	49.8318	0.938146	0.00107566
ECD_03132_aroE	87.3203	54.6261	-0.676727	0.00107566
ECD_01602_rsxE	35.1632	13.1356	-1.42058	0.001087
ECD_02118_yejM	43.0299	24.4551	-0.815204	0.00109173
ECD_01800_htpX	191.81	136.961	-0.485909	0.00109793
ECD_01128_phoP	32.6381	60.8554	0.898827	0.00110333
ECD_03735_fre	165.4	109.019	-0.60138	0.00111044
ECD_03821_rpmE	4934.65	8629.12	0.806266	0.00111279
ECD_01878_uvrC	9.87514	3.74043	-1.4006	0.00111878
ECD_00347_phoB	15.0233	38.5275	1.35869	0.00113034
ECD_02252_yfcA	44.5351	16.5368	-1.42927	0.00113313
ECD_02113_rsuA	60.7444	25.4377	-1.25579	0.00113636
ECD_03846_oxyR	133.007	195.871	0.558406	0.00113636
ECD_02936_dnaG	95.645	134.173	0.488334	0.00113636
ECD_03212_fic	13.1307	43.3442	1.72289	0.0011379
ECD_03756_typA	712.249	513.649	-0.471601	0.00114161
ECD_02372_bcp	219.325	119.988	-0.870179	0.00114536
ECD_00088_mraY	153.35	83.8466	-0.871	0.00116135
ECD_00102_zapD	105.237	61.9164	-0.765247	0.00116754
ECD_03192_rpsG	4850.44	6375.84	0.3945	0.00117654
ECD_02791_mutY	51.0059	29.2463	-0.802411	0.00118339
ECD_02410_ndk	878.597	631.299	-0.476879	0.00118339
ECD_03673_wecG	56.2589	29.2074	-0.945747	0.00119346
ECD_00927_mukE	86.929	52.256	-0.734241	0.00119899
ECD_01114_lolE	62.9239	32.0617	-0.97276	0.00121264
ECD_02234_hisJ	83.5309	50.3271	-0.730976	0.00121264
ECD_02361_acrD	8.38964	3.68097	-1.18852	0.00122314
ECD_02551_mltB	30.414	15.5867	-0.964421	0.00123575
ECD_03613_glmS	486.132	397.2	-0.291483	0.00123666
ECD_02776_rsmE	98.9668	60.2113	-0.716911	0.00124387
ECD_00612_ybeL	18.5954	52.0162	1.48402	0.00124867
ECD_02662_csdE	86.0702	151.204	0.812908	0.00124867
ECD_03685_dapF	109.302	69.5608	-0.651979	0.00124867
ECD_02425_suhB	272.864	352.465	0.369299	0.00124867
ECD_03686_yigA	100.731	62.4633	-0.689426	0.00125457
ECD_02453_tadA	71.9211	119.988	0.738402	0.00125931
ECD_00908_focA	58.5777	32.1517	-0.865457	0.00126182
ECD_02191_menD	19.1234	9.35302	-1.03183	0.00126266
ECD_00617_rihA	30.3601	7.99459	-1.92508	0.00126586
ECD_03197_yheO	84.9192	51.229	-0.729129	0.00126586
ECD_04041_hflK	261.201	132.562	-0.978498	0.00127322
ECD_01302_ycjG	23.9069	46.5855	0.962456	0.00127322
ECD_01750_yeaE	20.5849	42.4488	1.04414	0.00127324
ECD_00912_aroA	100.862	49.2688	-1.03364	0.00128038
ECD_00766_dinG	15.4026	7.51816	-1.03473	0.00128138
ECD_03894_rluF	41.9699	21.5366	-0.962561	0.00128156
ECD_01973_yegE	4.82799	1.69983	-1.50603	0.00129266
ECD_01842_cmoB	78.5298	51.2562	-0.615514	0.00130042
ECD_02893_mqsA	17.209	50.8956	1.56438	0.00130346
ECD_02793_mltC	25.1427	12.4647	-1.01229	0.00130591
ECD_03657_gpp	93.9867	45.8447	-1.0357	0.00132151
ECD_00476_cysS	168.657	114.757	-0.555508	0.00132151
ECD_02331_yfeX	73.9789	125.737	0.765219	0.00132293
ECD_01058_pyrC	59.6171	33.5548	-0.82921	0.00133791
ECD_03457_yibT	68.2437	181.596	1.41196	0.00135409
ECD_04342	1503.22	2959.76	0.977424	0.00135409
ECD_02354_maeB	52.6462	27.6558	-0.928748	0.00135409
ECD_02414_sseB	92.0279	54.8588	-0.74635	0.00135409
ECD_02744_serA	86.8945	59.0676	-0.556898	0.00135896
ECD_00830	19.8713	7.55528	-1.39513	0.00136143
ECD_02740_pepP	111.896	83.4853	-0.422569	0.00137315
ECD_03349_gor	135.448	104.429	-0.375211	0.00137729
ECD_00202_yafD	57.7546	33.4484	-0.787997	0.00138882
ECD_03617_atpG	1495.86	1083.23	-0.465628	0.00139517
ECD_00682_sdhD	485.267	219.782	-1.1427	0.00139606
ECD_02686_lysA	58.557	33.1703	-0.81995	0.00139606
ECD_03649_ilvD	104.704	70.2012	-0.576747	0.00139606
ECD_02018_gatC	73.7162	32.0986	-1.19947	0.00141323
ECD_02786_yggM	27.4988	50.9713	0.890319	0.00141737
ECD_02596_ispF	152.607	66.8549	-1.19071	0.00142928
ECD_00187_rof	112.244	220.302	0.972845	0.00142928
ECD_00637_glnS	190.549	121.844	-0.645123	0.00142928
ECD_01636_ydhR	71.3184	255.759	1.84244	0.00143084
ECD_00267_betA	27.3095	13.956	-0.968521	0.00143084
ECD_00027_rpsT	5558.48	9132.25	0.716279	0.00143084
ECD_02892_ygiS	11.5912	4.8941	-1.24391	0.0014354
ECD_02267_yfcZ	228.221	360.591	0.659933	0.00143831
ECD_02872_hybA	127.983	91.7634	-0.47996	0.0014405
ECD_00125_can	517.088	372.158	-0.474494	0.00144077
ECD_02680_ygdQ	26.031	68.9828	1.40601	0.0014631
ECD_00579_rna	39.9834	19.9956	-0.999717	0.00147193
ECD_04158_fecR	9.51156	2.4115	-1.97975	0.00147202
ECD_02221_ackA	616.99	393.446	-0.649084	0.00148315
ECD_02363_dapE	81.6984	56.3832	-0.535042	0.00148315
ECD_00076_leuA	7.92395	2.54493	-1.6386	0.00150587
ECD_00888_infA	1332.95	1799.19	0.43273	0.00150587
ECD_02642_sdaB	261.181	216.716	-0.26924	0.00151929
ECD_03750_yihA	146.206	241.736	0.725426	0.00152003
ECD_01606_pdxY	77.2204	49.3465	-0.646034	0.00152003
ECD_01250_topA	119.28	89.7712	-0.410023	0.0015231
ECD_00607_cobC	23.3098	7.99433	-1.54389	0.00152693
ECD_00865_artJ	30.7075	11.635	-1.40012	0.00152693
ECD_00430_fsr	14.6219	5.75216	-1.34595	0.00152693
ECD_01806_rsmF	27.7529	11.0002	-1.33511	0.00152693
ECD_01981_mdtC	5.29056	2.22114	-1.25212	0.00152693
ECD_00683_sdhA	424.038	211.513	-1.00345	0.00152693
ECD_03492_mutM	47.0275	23.8173	-0.981494	0.00152693
ECD_01645_pykF	100.701	54.7965	-0.877927	0.00152693
ECD_04389	985.769	630.285	-0.645246	0.00152693
ECD_01709_nadE	87.9114	58.3522	-0.591263	0.00152693
ECD_02463_lepA	215.189	134.853	-0.674217	0.00152894
ECD_04080_cycA	81.4705	113.106	0.47333	0.00152894
ECD_00992_cspG	34.9912	108.361	1.63078	0.00153212
ECD_03706_yigM	64.0291	37.0556	-0.789035	0.00153212
ECD_01825_pykA	116.37	80.0684	-0.539414	0.00153212
ECD_00797_gsiB	11.0607	3.55239	-1.63858	0.00153884
ECD_01155_ycgM	59.9145	96.9804	0.694787	0.00154293
ECD_01479_yneF	12.1094	3.23086	-1.90614	0.00155786
ECD_04245_yjjZ	66.3046	159.851	1.26955	0.00156899
ECD_02389_uraA	72.2829	36.0236	-1.00471	0.00156899
ECD_03473_waaH	451.037	259.786	-0.795922	0.00156899
ECD_03740_trkH	43.6151	28.2248	-0.627866	0.00156899
ECD_00217_gmhA	238.691	330.802	0.470827	0.00156899
ECD_03113_accB	1120.77	1051.61	-0.0918958	0.00156899
ECD_02537_ygaZ	59.5821	33.4403	-0.833293	0.0015803
ECD_01795_yebO	220.094	422.101	0.939466	0.00158311
ECD_00872_amiD	33.4448	63.0702	0.915175	0.00159176
ECD_02904_cpdA	133.244	93.2651	-0.514658	0.001603
ECD_04271_ytjC	130.697	187.172	0.518137	0.0016075
ECD_02927_bacA	97.5371	139.113	0.512231	0.0016075
ECD_01491_marB	90.2158	197.251	1.12858	0.00161337
ECD_03286_yhgN	33.7198	78.6881	1.22255	0.00162064
ECD_04045_nsrR	68.7657	135.662	0.980259	0.0016219
ECD_00149_fhuA	8.94684	22.2394	1.31367	0.00162581
ECD_03193_rpsL	5767.91	8468.34	0.55403	0.00162581
ECD_00016_insL-1	134.134	95.4509	-0.490844	0.00162581
ECD_02054_yehT	35.1503	16.6212	-1.08052	0.00162872
ECD_02502_grpE	644.864	564.265	-0.192622	0.00163474
ECD_02494_yfiB	21.6609	51.8161	1.25831	0.00163961
ECD_03072_yrbL	16.6476	38.3921	1.20549	0.00163961
ECD_00117_acnB	533.362	330.128	-0.692089	0.00163961
ECD_02825	203.739	423.633	1.05609	0.00164705
ECD_00054_apaG	181.147	112.288	-0.689956	0.00165074
ECD_00479_folD	138.894	104.162	-0.415156	0.00165074
ECD_01625_mepH	23.9607	10.0409	-1.25479	0.00166453
ECD_01271_sapA	17.3933	8.40184	-1.04976	0.00166453
ECD_03589_yidC	572.536	480.618	-0.252476	0.00166906
ECD_00429_ybaL	35.9198	22.7525	-0.658752	0.00167011
ECD_02245_pdxB	116.989	87.0343	-0.426714	0.00167011
ECD_00388_clpP	297.504	351.292	0.239761	0.00167011
ECD_00141_folK	30.7274	10.7559	-1.51439	0.00167276
ECD_04088_ytfK	236.183	577.942	1.29102	0.00167552
ECD_00812_ybjJ	13.8337	4.23742	-1.70693	0.00167983
ECD_00379_cyoE	1261.76	919.729	-0.45616	0.00167983
ECD_00239_proB	162.849	127.926	-0.348228	0.00167983
ECD_00425_adk	433.155	377.527	-0.198304	0.00167983
ECD_03616_atpD	1759.62	1300.9	-0.435753	0.00168465
ECD_03648_ilvE	162.923	124.208	-0.391439	0.00168465
ECD_00178_fabZ	635.413	807.735	0.346188	0.00168465
ECD_03983_basS	217.47	300.665	0.467342	0.00169193
ECD_00700_tolB	491.629	393.792	-0.320139	0.00169193
ECD_03474_tdh	423.187	397.837	-0.0891171	0.00169193
ECD_03729_tatA	421.556	765.702	0.861059	0.00169206
ECD_03276_glpE	107.398	184.137	0.777804	0.00169206
ECD_03035_infB	551.609	844.262	0.614044	0.00169206
ECD_03253_hslO	223.197	179.324	-0.315743	0.00169907
ECD_00962_sulA	22.1233	50.0382	1.17746	0.00169967
ECD_00407_ybaA	9.09247	42.2027	2.21459	0.00170334
ECD_00385_yajG	117.938	49.6745	-1.24745	0.00170334
ECD_03202_kefG	31.9045	60.648	0.926702	0.00170334
ECD_00328_ddlA	132.768	105.187	-0.335959	0.00170695
ECD_01018_putP	80.1195	47.2434	-0.762042	0.00172136
ECD_02476_trxC	62.8012	144.637	1.20357	0.00172898
ECD_00381_cyoC	1247.1	891.107	-0.484908	0.00173825
ECD_04038_miaA	450.272	402.32	-0.162453	0.00173825
ECD_00353_queA	79.2044	51.8214	-0.612033	0.00174382
ECD_01681_ihfA	998.269	1266.63	0.3435	0.00174382
ECD_03621_atpE	5039.06	4428.32	-0.186397	0.00174382
ECD_03860_rplA	5873.76	7689.15	0.38854	0.00175139
ECD_00393_ppiD	174.204	147.147	-0.243519	0.00176033
ECD_04111_ridA	379.19	486.441	0.359342	0.00176534
ECD_03318_zntA	34.9272	49.6078	0.506216	0.00176712
ECD_03093_yhcB	256.977	351.377	0.451381	0.00178252
ECD_03501_yicC	139.101	202.32	0.540503	0.00178515
ECD_00645_pgm	208.863	188.164	-0.150572	0.00178515
ECD_02888_ygiQ	74.0763	58.1937	-0.34815	0.0017982
ECD_00539_nfsB	198.618	142.91	-0.474891	0.00180641
ECD_04120_argI	35.507	20.9123	-0.763753	0.00180657
ECD_02315_ptsH	1314.73	1043.71	-0.333054	0.00180657
ECD_01686_rpmI	8333.88	8173.16	-0.0280946	0.00181626
ECD_01980_mdtB	5.44951	2.39539	-1.18586	0.0018227
ECD_00633_nagC	44.6111	28.0467	-0.669572	0.00182642
ECD_02309_yfeH	31.0421	13.2058	-1.23306	0.0018266
ECD_02669_ptrA	19.6507	12.0128	-0.710008	0.00183834
ECD_03044_rlmE	254.095	318.294	0.324991	0.00184052
ECD_01605_gstA	21.0609	40.9981	0.960989	0.00184793
ECD_04215_hsdM	103.633	84.7053	-0.290959	0.00185483
ECD_04019_ecnB	142.229	375.548	1.40078	0.0018599
ECD_03624_rsmG	164.256	116.291	-0.498205	0.00186088
ECD_04085_cpdB	17.563	10.5796	-0.731258	0.00186497
ECD_02254_aroC	106.424	76.1215	-0.483446	0.00186497
ECD_00974_yccA	137.782	98.9438	-0.477706	0.00186497
ECD_00167_rpsB	3548.11	4506.54	0.344967	0.00186497
ECD_01089_fabG	1296.09	1044.71	-0.311066	0.00186497
ECD_03961_alsR	22.8114	8.65602	-1.39798	0.00187799
ECD_03059_mlaE	124.399	182.825	0.555491	0.00187799
ECD_00055_rsmA	204.432	146.359	-0.482113	0.00187799
ECD_04044_purA	596.905	434.484	-0.458197	0.00187799
ECD_00363_ribE	315.405	407.836	0.370785	0.00187799
ECD_03052_ispB	143.362	111.018	-0.368866	0.00187799
ECD_04100_fbp	231.923	264.098	0.187426	0.00187799
ECD_00271_yahA	11.7114	35.9464	1.61794	0.00187802
ECD_03502_dinD	7.18759	17.8389	1.31145	0.00187975
ECD_04278_yjjY	499	1183.54	1.24599	0.00189028
ECD_00866_artM	90.8258	56.2901	-0.690221	0.00189028
ECD_03477_waaF	115.419	84.1207	-0.456349	0.00189028
ECD_03467_secB	528.332	437.638	-0.271707	0.00189077
ECD_03988_adiA	3.09228	8.22365	1.41111	0.00190061
ECD_00915_rpsA	4162.63	3065.11	-0.441558	0.00191347
ECD_01597_rsxA	58.3412	96.3676	0.724034	0.00191435
ECD_03668_wecD	67.8036	41.7263	-0.700405	0.00191435
ECD_00008_talB	396.624	310.144	-0.354833	0.00191501
ECD_02443_glyA	345.794	281.166	-0.298491	0.00191501
ECD_01164_dadA	86.6507	62.4446	-0.472634	0.00191621
ECD_03320_yhhQ	10.1217	26.6536	1.39687	0.00192922
ECD_02402_yfgJ	123.627	222.675	0.848945	0.00192922
ECD_03091_rplM	5633.47	8616.93	0.613149	0.00192922
ECD_02206_nuoI	387.346	343.742	-0.172296	0.00192922
ECD_00629_miaB	191.459	184.253	-0.055348	0.00192922
ECD_01924_hisB	39.3108	23.6943	-0.730384	0.00194692
ECD_01942_vioA	69.5621	91.772	0.399752	0.00194692
ECD_00421_dnaX	103.882	87.0655	-0.254767	0.00194843
ECD_03198_fkpA	400.005	186.348	-1.10201	0.00196028
ECD_03445_selB	55.6889	41.8156	-0.413351	0.00196028
ECD_02312_zipA	257.929	283.029	0.133978	0.00197047
ECD_00195_rcsF	81.3776	41.6845	-0.965122	0.00197638
ECD_03650_ilvA	117.102	97.7906	-0.259996	0.00197685
ECD_03897_pgi	197.776	120.792	-0.711348	0.00197721
ECD_02739_ubiH	98.807	70.4312	-0.488399	0.00197721
ECD_03877_hupA	2175.23	2819.06	0.374047	0.00198294
ECD_02209_nuoF	441.938	322.921	-0.452663	0.00198434
ECD_03507_spoT	188.805	156.217	-0.273348	0.001996
ECD_02670_recC	22.4103	16.2838	-0.460723	0.00200044
ECD_03208_crp	449.007	437.505	-0.0374403	0.00200044
ECD_03285_asd	148.527	108.147	-0.457732	0.00200301
ECD_04101_mpl	136.653	165.443	0.275814	0.00200301
ECD_00492_renD	18.2964	313.012	4.09659	0.00200314
ECD_00623_gltI	39.1192	17.4851	-1.16175	0.0020184
ECD_02837	21.7138	12.54	-0.792081	0.0020184
ECD_02724_recJ	70.2312	56.6305	-0.310534	0.0020184
ECD_02767_speB	265.672	277.598	0.0633546	0.0020184
ECD_01835_yebC	282.599	285.688	0.0156798	0.0020184
ECD_00871_ybjQ	38.9465	84.712	1.12107	0.00201847
ECD_01941_vioB	62.2917	103.556	0.733299	0.00202218
ECD_02241_accD	580.543	560.82	-0.0498636	0.00202218
ECD_00473_purE	121.316	61.5586	-0.978733	0.00202556
ECD_03341_yhiN	46.9835	70.1269	0.577815	0.00202556
ECD_00953_uup	74.3166	55.4615	-0.422198	0.00202655
ECD_02658_ygdD	72.9589	123.868	0.763643	0.00202849
ECD_02839_yghF	21.0046	8.4417	-1.3151	0.0020365
ECD_02184_arnE	120.11	50.863	-1.23967	0.0020365
ECD_00965_yccF	23.015	49.4686	1.10394	0.0020365
ECD_02289_alaC	51.3824	34.4467	-0.576908	0.0020365
ECD_04193_uxuR	37.3565	60.2017	0.688444	0.00206153
ECD_02316_ptsI	601.155	385.842	-0.639727	0.00206153
ECD_01751_mipA	342.921	332.639	-0.0439182	0.00206153
ECD_01088_fabD	632.634	640.839	0.0185917	0.00206153
ECD_00507_rrrD	4.64114	19.691	2.08499	0.0020688
ECD_03753_glnG	18.1955	9.90119	-0.877906	0.00207044
ECD_02401_xseA	34.2615	19.6635	-0.80107	0.00207044
ECD_01213_hns	633.315	1017.95	0.684669	0.00207044
ECD_00971_rlmI	100.213	80.7079	-0.312292	0.00207044
ECD_04026_frdA	25.4418	16.2175	-0.649655	0.0020713
ECD_00382_cyoB	1085.35	670.102	-0.695707	0.00209347
ECD_03552_uhpB	21.5633	33.5142	0.636198	0.00209347
ECD_03618_atpA	2009.87	1323.35	-0.602913	0.00209347
ECD_03110_mreB	337.093	323.103	-0.0611517	0.00209756
ECD_02643_ygdG	38.9955	63.2367	0.697454	0.00210164
ECD_04039_hfq	1037.93	1156.46	0.155995	0.00210164
ECD_03680_hemC	148.076	110.527	-0.421943	0.00212428
ECD_03200_slyD	1561.73	1905.91	0.287335	0.00212428
ECD_01678_btuD	24.2512	11.2719	-1.10533	0.00212628
ECD_00779_dps	75.4731	117.402	0.637422	0.00213815
ECD_02873_hybO	144.179	141.673	-0.0253002	0.00215942
ECD_00422_ybaB	620.025	661.714	0.0938815	0.00216073
ECD_02894_mqsR	12.1812	42.3871	1.79897	0.00217197
ECD_01782_pabB	21.0681	12.4401	-0.760058	0.00217197
ECD_01572_pntA	49.2152	34.2282	-0.523919	0.00217197
ECD_01629_purR	89.0945	115.956	0.380175	0.00217197
ECD_00196_metQ	139.611	105.604	-0.402747	0.00217436
ECD_04252_ytjA	25.9401	100.162	1.94908	0.00217533
ECD_00423_recR	510.071	517.892	0.0219554	0.00217862
ECD_01270_sapB	22.9013	11.5822	-0.983521	0.00218489
ECD_03239_dam	92.0847	66.0036	-0.480416	0.00218815
ECD_03678_hemX	102.211	81.7658	-0.321985	0.00218815
ECD_03061_yrbG	33.4233	52.2741	0.645242	0.00219287
ECD_02185_arnF	59.3021	30.4529	-0.961503	0.00220297
ECD_03196_tusD	100.472	56.5529	-0.829116	0.00220297
ECD_03596_yieE	23.5939	41.7284	0.822614	0.00220297
ECD_01097_ptsG	159.816	98.0623	-0.704645	0.00220297
ECD_04095_ppa	1226	1438.62	0.230724	0.00220297
ECD_03476_hldD	189.182	188.124	-0.00809437	0.00220297
ECD_03077_gltB	46.7353	32.3438	-0.531022	0.00220323
ECD_03845_argH	139.09	118.253	-0.234147	0.00220323
ECD_00174_rseP	152.075	193.769	0.349553	0.00220645
ECD_02901_ygiN	236.784	331.658	0.486123	0.00220857
ECD_02232_hisM	28.0083	12.8274	-1.12663	0.0022129
ECD_01824_yebK	26.1038	13.847	-0.914682	0.0022129
ECD_02053_yehS	59.3984	32.1948	-0.883595	0.0022129
ECD_01832_ruvA	86.9094	129.014	0.569941	0.0022129
ECD_00970_hspQ	310.544	445.379	0.520234	0.0022129
ECD_03818_ftsN	99.0148	75.2091	-0.396737	0.0022129
ECD_01784_sdaA	115.64	133.946	0.212008	0.0022129
ECD_01883_yedV	3.88888	0.816181	-2.2524	0.00221502
ECD_03475_kbl	380.355	344.964	-0.1409	0.00222453
ECD_03362_mdtF	2.10279	4.9591	1.23777	0.00223463
ECD_02090_nupX	3.96945	12.0177	1.59815	0.00224006
ECD_00420_apt	260.196	197.671	-0.396494	0.00224006
ECD_03754_glnL	20.8155	10.5078	-0.986193	0.0022527
ECD_03149_rpsM	9048.23	11266	0.316263	0.0022527
ECD_03662_wecA	129.116	107.458	-0.264887	0.0022527
ECD_00234_frsA	40.138	26.3847	-0.605266	0.00225757
ECD_03266_nfuA	280.155	326.917	0.2227	0.00227234
ECD_03770_yihX	40.3303	66.6396	0.724517	0.0022827
ECD_02768_speA	478.505	411.819	-0.216525	0.00228621
ECD_00605_rlmH	212.508	150.339	-0.499297	0.00229378
ECD_03013_rsmI	94.8688	121.515	0.357133	0.00229378
ECD_00077_leuL	1654.86	846.576	-0.967001	0.00229549
ECD_00392_hupB	3583.45	3129.26	-0.195529	0.00229549
ECD_04017_efp	1059.99	1067.13	0.00968728	0.00229549
ECD_00389_clpX	406.729	454.157	0.159121	0.00230159
ECD_04046_rnr	62.0858	58.0719	-0.0964239	0.00230415
ECD_02391_purM	101.431	136.518	0.428594	0.00230617
ECD_01601_rsxG	45.0698	22.5741	-0.997496	0.0023165
ECD_02657_rlmM	70.5519	92.876	0.396621	0.00232838
ECD_03255_pck	171.274	186.708	0.12448	0.00232838
ECD_00702_ybgF	572.968	414.835	-0.465916	0.00232883
ECD_03931_ssb	374.416	478.462	0.353763	0.00233176
ECD_02182_arnD	194.893	149.61	-0.38147	0.00234893
ECD_02223_yfcC	1.78135	6.17528	1.79353	0.00235407
ECD_03258_greB	17.3455	38.2575	1.14118	0.00235407
ECD_03033_truB	179.479	198.408	0.144657	0.00235407
ECD_03950_yjcO	22.9649	42.9017	0.901601	0.00235661
ECD_04086_cysQ	79.4272	114.793	0.531331	0.00235661
ECD_03731_tatC	214.179	178.896	-0.259695	0.00236231
ECD_03728_ubiB	63.7212	51.5765	-0.305058	0.00236991
ECD_02819	36.0888	19.7212	-0.871804	0.00238531
ECD_03238_rpe	113.467	79.2916	-0.517038	0.00238531
ECD_02037	12.3053	51.988	2.07889	0.00239058
ECD_00371_thiI	102.297	95.2222	-0.103396	0.00239058
ECD_03675_aslB	4.85011	11.2352	1.21193	0.00239585
ECD_03597_chrR	30.0046	53.1483	0.82484	0.00241528
ECD_00632_umpH	81.1841	50.9703	-0.67154	0.00242482
ECD_02317_crr	881.918	979.367	0.151205	0.00242843
ECD_03745_srkA	70.9924	52.023	-0.448515	0.00243548
ECD_03402_yiaD	439.706	379.5	-0.212441	0.00243548
ECD_00355_yajC	885.336	752.156	-0.235194	0.00243762
ECD_02043_mrp	137.258	124.803	-0.137239	0.00243762
ECD_02629_relA	63.1631	59.8339	-0.0781193	0.00243762
ECD_02591_rpoS	129.411	208.822	0.69032	0.00244754
ECD_01775_fadD	27.1529	17.9766	-0.594986	0.00245464
ECD_02497_rimM	4089.62	5434.68	0.410227	0.00245464
ECD_03058_mlaD	114.055	160.46	0.492489	0.00247759
ECD_01499_rspR	32.9787	17.8961	-0.881894	0.00248037
ECD_00884_macB	19.3042	12.1468	-0.668343	0.00248068
ECD_02179_arnB	276.536	262.499	-0.0751558	0.00248336
ECD_02877_yqhA	103.268	145.945	0.499033	0.00248858
ECD_00952_rlmL	79.0144	70.016	-0.17443	0.00249415
ECD_02461_rnc	136.857	106.91	-0.356269	0.00249941
ECD_04008_dcuA	79.0024	62.4796	-0.338511	0.00250382
ECD_02114_yejH	7.86026	2.96826	-1.40496	0.0025261
ECD_03107_yhdE	106.277	69.6508	-0.60962	0.00253042
ECD_03471_envC	80.4074	59.2244	-0.441138	0.00253042
ECD_02499_ffh	190.091	181.15	-0.0695083	0.00253042
ECD_03926_tyrB	76.4396	37.0377	-1.04533	0.00253784
ECD_03386_bcsG	15.915	4.7051	-1.75809	0.00253934
ECD_01300_tyrR	42.6227	30.1466	-0.499625	0.00254191
ECD_02272_mlaA	148.106	184.453	0.316627	0.00254191
ECD_00082_mraZ	219.398	278.355	0.343371	0.00254448
ECD_03074_elbB	71.9515	105.208	0.548152	0.00254568
ECD_03752_hemN	84.2499	72.4967	-0.216759	0.00254568
ECD_00357_secF	345.731	319.687	-0.112989	0.00255184
ECD_01796_mgrB	406.537	715.122	0.814802	0.00255401
ECD_03167_rpsS	7263.91	7543.48	0.0544842	0.00256996
ECD_01297_ycjW	7.1945	2.12262	-1.76105	0.00257221
ECD_03369_yhjC	11.9936	4.14106	-1.5342	0.00258002
ECD_01166_cvrA	12.0054	5.6589	-1.08509	0.00258672
ECD_00538_ybdG	24.5949	14.445	-0.76779	0.00258875
ECD_00085_ftsI	102.742	53.3389	-0.945768	0.002599
ECD_02237_purF	74.7689	82.1615	0.136025	0.002599
ECD_02597_ispD	98.3833	65.8069	-0.580174	0.00260529
ECD_02507_ratA	218.268	269.193	0.302542	0.00260925
ECD_03826_metL	64.6577	57.5046	-0.169145	0.00260925
ECD_00120_speE	180.467	183.243	0.0220228	0.00260925
ECD_02328_murQ	26.8851	15.2748	-0.81565	0.00261769
ECD_02785_yggW	55.3202	38.047	-0.540024	0.0026243
ECD_03342_pitA	218.795	225.275	0.0421137	0.00262605
ECD_02424_trmJ	165.569	195.656	0.240888	0.00263345
ECD_02777_gshB	148.051	133.485	-0.149422	0.00263926
ECD_02035	11.2818	25.1905	1.15889	0.00263946
ECD_00091_murG	95.4875	74.0254	-0.367291	0.00263946
ECD_03930_uvrA	42.429	34.7038	-0.289957	0.00263946
ECD_00240_proA	129.803	131.046	0.0137453	0.00264693
ECD_01937_wbbC	30.1215	45.4811	0.594472	0.002647
ECD_02684_aas	18.0483	11.1342	-0.696862	0.00264825
ECD_03819_cytR	48.1882	29.4825	-0.708821	0.00265185
ECD_03588_yidD	690.072	1107.06	0.681915	0.00265185
ECD_03117_prmA	101.79	69.068	-0.559506	0.00265185
ECD_00069_thiP	12.106	5.89231	-1.03882	0.00265354
ECD_00354_tgt	275.499	183.471	-0.586495	0.00267285
ECD_01086_plsX	397.523	530.702	0.416865	0.00267285
ECD_02889_ftsP	63.9757	50.6536	-0.33686	0.00267285
ECD_00644_seqA	182.281	146.966	-0.310683	0.00267285
ECD_01301_tpx	698.416	725.634	0.0551566	0.00267285
ECD_03652_ilvC	191.462	104.802	-0.869387	0.00269353
ECD_03498_slmA	140.823	181.135	0.363189	0.00269831
ECD_02189_menB	111.711	87.5374	-0.351793	0.00270339
ECD_01370_aldA	11.0081	4.86026	-1.17946	0.00270712
ECD_00444_ybbO	35.3394	20.8715	-0.759743	0.00270712
ECD_02204_nuoK	547.431	441.105	-0.311555	0.00270714
ECD_03022_yhbQ	51.6316	96.3862	0.900571	0.00270851
ECD_02732_yqfB	83.1073	147.785	0.83045	0.00271739
ECD_02922_hldE	136.399	158.928	0.22054	0.00271842
ECD_03249_nudE	173.62	137.875	-0.332566	0.00272133
ECD_00788_ybiU	4.68839	12.2621	1.38704	0.00272619
ECD_01258_pyrF	167.188	169.67	0.0212631	0.00273224
ECD_01091_fabF	2229.42	2765.9	0.31108	0.00274696
ECD_03625_mnmG	216.955	218.465	0.0100081	0.00274696
ECD_02280_evgS	3.16817	0.853775	-1.89172	0.00274835
ECD_02771_yqgD	125.184	55.3777	-1.17667	0.00274835
ECD_00741_bioA	73.1326	32.7072	-1.16091	0.00274835
ECD_02622_queE	52.934	31.819	-0.734305	0.00274835
ECD_01811_yebZ	53.5785	75.4366	0.493612	0.00274835
ECD_03726_ubiE	151.714	199.989	0.398565	0.00274835
ECD_02814	117.054	91.1397	-0.36102	0.00274835
ECD_01657_ydiK	40.2264	26.0875	-0.624785	0.00278853
ECD_04339_ypfM	1276.04	2601.77	1.02782	0.00278918
ECD_02158_ubiG	55.076	36.2536	-0.6033	0.00278918
ECD_03062_kdsD	80.3747	106.475	0.405696	0.00279571
ECD_02828	121.497	118.962	-0.0304234	0.00279571
ECD_01893_shiA	15.3965	7.5525	-1.02758	0.0027964
ECD_02255_prmB	108.958	127.655	0.228473	0.0027964
ECD_00757_ybhP	15.3891	28.8513	0.906732	0.00279709
ECD_03166_rplV	7363.54	7398.7	0.00687281	0.00279709
ECD_03831_gldA	8.84298	17.6468	0.996804	0.0027989
ECD_02539_mprA	261.346	223.726	-0.224223	0.0027989
ECD_01821_eda	207.567	194.896	-0.0908737	0.0027989
ECD_01087_fabH	562.568	550.889	-0.0302665	0.0027989
ECD_02058_yehW	14.8968	37.2919	1.32386	0.00281227
ECD_01895_yeeN	81.5547	32.263	-1.33789	0.00282001
ECD_01133_rluE	12.0081	3.38956	-1.82484	0.00283001
ECD_00775_ybiO	3.01369	6.69783	1.15217	0.00283001
ECD_03210_argD	102.296	92.9315	-0.138509	0.00284499
ECD_04009_aspA	202.615	114.646	-0.821555	0.00284553
ECD_00621_gltK	19.8668	8.75796	-1.18169	0.0028492
ECD_00414_acrA	206.4	154.853	-0.414547	0.0028492
ECD_04031_rsgA	94.2974	72.0849	-0.387521	0.0028492
ECD_00362_ribD	77.2468	91.5581	0.245213	0.00285779
ECD_02925_ygiM	24.7924	11.6986	-1.08356	0.00286544
ECD_03057_mlaC	138.373	172.543	0.318392	0.00286544
ECD_01090_acpP	9598.71	9965.37	0.0540831	0.00286807
ECD_03343_uspB	13.7374	40.0558	1.5439	0.00287118
ECD_02938_mug	30.4435	58.5154	0.942683	0.00287118
ECD_02500_ypjD	32.0713	18.3912	-0.802267	0.00287118
ECD_01847_argS	182.813	169.479	-0.109258	0.00287118
ECD_03324_acpT	41.7185	66.5231	0.67317	0.00287396
ECD_00153_hemL	296.205	313.066	0.0798667	0.00287494
ECD_02239_dedD	148.723	177.869	0.258187	0.00288805
ECD_00781_ompX	3652.69	4051.86	0.149627	0.00289059
ECD_01870_ftnB	5.73268	18.9482	1.72478	0.00289453
ECD_00782_opgE	14.692	8.23682	-0.834877	0.00289453
ECD_02869_hybD	193.934	161.877	-0.260667	0.00289453
ECD_04212_mcrB	8.49226	3.79011	-1.16391	0.00289732
ECD_01050_lpxL	51.484	34.7746	-0.566091	0.00290682
ECD_01624_grxD	563.098	684.117	0.280858	0.00290871
ECD_02730_ygfZ	110.851	114.471	0.0463694	0.00292138
ECD_00241_yagP	8.38886	26.7467	1.67282	0.0029267
ECD_02409_rlmN	169.772	185.542	0.12815	0.0029267
ECD_02836	15.9097	8.35595	-0.929027	0.00293851
ECD_00922_kdsB	165.552	163.625	-0.0168872	0.00293873
ECD_03159_rplE	6874.69	8473.64	0.301687	0.00295097
ECD_03465_cysE	99.5092	80.3365	-0.308774	0.00296472
ECD_01031_ycdX	111.624	90.3203	-0.30553	0.0029704
ECD_04002_cadA	2.07342	4.86196	1.22952	0.00297046
ECD_03556_ivbL	4211.61	2380.71	-0.822982	0.00297662
ECD_02660_ygdI	22.5175	76.4572	1.7636	0.0030226
ECD_01826_lpxM	43.2583	29.0538	-0.574248	0.0030226
ECD_02311_ligA	68.4534	50.4019	-0.441643	0.0030226
ECD_00350_proY	75.9569	65.374	-0.216463	0.0030226
ECD_03585_dnaA	150.312	167.999	0.160499	0.0030226
ECD_03313_ftsY	106.757	110.365	0.0479538	0.0030226
ECD_02745_rpiA	248.286	246.611	-0.00976455	0.0030226
ECD_03805_yiiQ	20.7613	7.92745	-1.38897	0.00302854
ECD_04127_lptF	99.8422	112.098	0.167041	0.00302854
ECD_02935_rpsU	8215.5	7953.89	-0.0466876	0.003032
ECD_03584_dnaN	155.154	136.025	-0.189835	0.00303231
ECD_02403_der	134.107	142.101	0.0835368	0.00303231
ECD_00950_zapC	27.7735	55.0233	0.986333	0.00303565
ECD_02248_fabB	559.823	393.737	-0.507741	0.00303565
ECD_03663_wzzE	119.475	115.345	-0.05076	0.00303647
ECD_04197_iadA	70.9432	57.5902	-0.300841	0.00304612
ECD_03822	6.05132	17.2526	1.51149	0.00304768
ECD_03641_yieP	24.3977	43.0826	0.820357	0.00305318
ECD_00112_pdhR	272.567	316.206	0.214251	0.00305318
ECD_03674_yifK	72.1468	45.6168	-0.661369	0.00307595
ECD_01188_ychQ	57.0346	31.7843	-0.84352	0.00307828
ECD_02898_qseC	15.7781	9.30274	-0.7622	0.00307828
ECD_00180_lpxB	126.91	86.2725	-0.556832	0.00308081
ECD_00532_cusR	46.9134	83.1387	0.82552	0.00309602
ECD_00387_tig	1216.65	1720.16	0.499625	0.00309602
ECD_01946_rfbD	75.1038	102.118	0.443275	0.00309602
ECD_01733_selD	78.7483	59.4433	-0.405736	0.00309602
ECD_01212_galU	126.548	116.669	-0.117273	0.00309602
ECD_03842_argE	69.1381	55.1344	-0.326528	0.00310082
ECD_01836_nudB	233.86	290.03	0.310554	0.00310234
ECD_03169_rplW	6220.09	6917.05	0.15322	0.00310234
ECD_02031_thiD	46.3624	28.8822	-0.682775	0.00310431
ECD_00089_murD	139.485	90.8426	-0.618671	0.00311859
ECD_00158_mtn	213.929	217.491	0.0238191	0.00311859
ECD_03937_yjcE	35.5398	17.6361	-1.01091	0.00312333
ECD_00932_aspC	243.531	180.832	-0.429455	0.00312333
ECD_00006_yaaA	43.586	27.2286	-0.678739	0.00312561
ECD_03063_kdsC	124.7	155.818	0.321409	0.00313627
ECD_03470_gpmM	65.7548	66.5945	0.018307	0.00314201
ECD_00126_yadG	52.4777	38.345	-0.452668	0.00317632
ECD_04146	9.56377	20.1939	1.07827	0.00318008
ECD_01736_ansA	46.1251	21.9764	-1.06959	0.00318008
ECD_04270_yjjX	53.3078	80.5221	0.595038	0.00319173
ECD_01211_rssB	18.3005	9.95074	-0.879006	0.00320012
ECD_00456_allR	91.6069	72.7614	-0.332283	0.00321264
ECD_02775_endA	23.4718	11.9602	-0.972694	0.00321655
ECD_02557_srlR	13.8774	6.20542	-1.16113	0.0032208
ECD_00440_qmcA	8.55607	17.7557	1.05326	0.00322604
ECD_02385_yfgO	22.2447	36.1873	0.702022	0.00323645
ECD_03936_ghxP	115.25	131.366	0.188834	0.00323833
ECD_03311_ftsX	101.242	96.4884	-0.0693791	0.00323833
ECD_01161_nhaB	41.8586	26.9548	-0.634982	0.0032435
ECD_00856_nfsA	147.468	115.919	-0.347281	0.00326316
ECD_01633_ribC	70.2014	93.8827	0.41936	0.00327233
ECD_03853_murB	54.4437	71.4521	0.392211	0.00327233
ECD_02484_rluD	73.4657	53.5644	-0.455797	0.0032787
ECD_04069_rpsR	5925.85	7106.15	0.262045	0.0032795
ECD_03776_fdhE	79.2696	46.6788	-0.763999	0.00328862
ECD_02460_era	158.75	176.344	0.15164	0.0032925
ECD_02407_ispG	215.869	126.434	-0.771775	0.0033021
ECD_00964_yccS	20.8946	14.0736	-0.570133	0.0033021
ECD_00704_pnuC	104.581	79.2311	-0.400483	0.0033021
ECD_02831	9.25147	2.97352	-1.63751	0.0033098
ECD_00578_rnk	136.721	188.196	0.460994	0.0033098
ECD_01436_adhP	2.6319	8.25772	1.64964	0.00331262
ECD_03331_rhsB	3.82193	6.62148	0.792852	0.00331262
ECD_02478_pka	12.413	7.35115	-0.755806	0.00331561
ECD_00857_rimK	110.408	99.4555	-0.150719	0.00332753
ECD_02123_ccmF	12.006	7.08505	-0.760903	0.00333219
ECD_04037_mutL	47.8919	42.2292	-0.18154	0.00333674
ECD_01162_fadR	91.4094	63.0358	-0.536171	0.00333748
ECD_00166_map	223.408	202.965	-0.138455	0.00333748
ECD_02242_dedA	164.393	138.537	-0.246872	0.00334646
ECD_02974_yhaJ	47.9122	33.1263	-0.532417	0.00336247
ECD_03148_rpsK	8960.9	9825.01	0.132815	0.00336247
ECD_00475_ppiB	574.377	495.775	-0.212313	0.00336391
ECD_03056_mlaB	226.01	337.351	0.577864	0.00338112
ECD_03670_wzxE	61.8145	48.8654	-0.339131	0.00338112
ECD_01873_ftnA	106.799	137.706	0.366698	0.00338251
ECD_00169_pyrH	287.752	342.223	0.250109	0.00338481
ECD_02017_gatD	86.5644	47.367	-0.869893	0.00339051
ECD_01940_wbbA	36.1756	57.5986	0.671015	0.00339399
ECD_00235_crl	215.683	305.778	0.503569	0.00340287
ECD_00697_tolQ	164.623	149.517	-0.138855	0.0034288
ECD_03921_dusA	53.1411	86.7467	0.70698	0.00343779
ECD_02415_pepB	127.118	135.112	0.087988	0.00344607
ECD_01196_chaC	18.0488	33.1117	0.875438	0.00345481
ECD_02233_hisQ	50.0614	29.4326	-0.766286	0.00345613
ECD_03949_gltP	158.753	98.3076	-0.691405	0.00345613
ECD_02958_sstT	28.0184	18.8221	-0.573947	0.00345725
ECD_03137_def	237.972	213.927	-0.153671	0.00345823
ECD_03242_aroK	425.081	461.568	0.118805	0.0034859
ECD_01774_rnd	44.4732	32.746	-0.441616	0.00348932
ECD_00032_fkpB	245.746	209.611	-0.229456	0.00349252
ECD_00090_ftsW	109.329	79.3869	-0.461697	0.00349697
ECD_02868_hybE	191.265	168.874	-0.179625	0.00349697
ECD_00926_mukF	64.5979	57.0258	-0.179873	0.0035009
ECD_03500_rph	195.737	237.509	0.279068	0.00352105
ECD_04148	9.72965	5.58299	-0.801349	0.00352396
ECD_01030_ghrA	79.859	98.4118	0.301376	0.00352396
ECD_00170_frr	837.82	1178.3	0.492	0.00353579
ECD_02417_fdx	447.671	436.089	-0.0378163	0.00353579
ECD_00290_codB	47.7829	35.2671	-0.438169	0.00355585
ECD_03053_sfsB	25.6127	62.1011	1.27776	0.00355708
ECD_01922_hisD	28.4493	18.7073	-0.604797	0.00358529
ECD_00917_ycaI	2.09433	4.52722	1.11214	0.003597
ECD_02477_yfiP	28.6448	15.4819	-0.887694	0.00361893
ECD_00895_lolA	62.1041	90.2478	0.539205	0.00361893
ECD_00004_thrC	207.356	152.116	-0.446937	0.00361893
ECD_02291_ypdB	18.5195	9.41276	-0.976357	0.00364504
ECD_00708_gpmA	569.407	510.024	-0.158896	0.00364574
ECD_01113_lolD	85.4993	44.3652	-0.946484	0.00365435
ECD_04027_epmA	41.2475	65.3312	0.663464	0.00365435
ECD_01943_wzx	40.1946	61.4371	0.612109	0.00366358
ECD_00885_cspD	142.019	231.205	0.703089	0.00366556
ECD_01431_yddG	9.19708	3.31405	-1.47258	0.00367036
ECD_03161_rplN	11088.9	15293.2	0.463779	0.00367036
ECD_02370_dapA	265.341	262.516	-0.0154411	0.00368917
ECD_01822_edd	36.4953	28.2727	-0.368298	0.00370449
ECD_01200_narX	16.3147	24.0236	0.558279	0.00371146
ECD_00348_phoR	8.43434	15.3519	0.864072	0.00371646
ECD_02358_nudK	19.8741	6.04176	-1.71785	0.0037275
ECD_01489_marR	27.0357	53.3267	0.979992	0.00373181
ECD_00133_panB	95.0966	120.801	0.345168	0.00373181
ECD_00171_dxr	59.398	46.9425	-0.33952	0.00373285
ECD_00403_amtB	3.04153	7.56957	1.31542	0.00374798
ECD_00053_apaH	63.1878	46.9393	-0.428851	0.00374798
ECD_01749_yeaD	38.3163	24.2668	-0.658975	0.00375028
ECD_00147_hrpB	24.3151	28.8933	0.248884	0.00377579
ECD_02639_queF	71.8389	56.2828	-0.352072	0.00380893
ECD_00531_cusS	16.4278	9.53262	-0.785199	0.00380955
ECD_02214_lrhA	63.0856	46.1623	-0.450594	0.00380955
ECD_04125_holC	105.373	71.1897	-0.565763	0.00381677
ECD_00028_yaaY	318.533	455.748	0.516796	0.00383236
ECD_03219_cysG	45.3403	36.6898	-0.305414	0.00383236
ECD_01183_ispE	305.155	221.932	-0.459425	0.00384626
ECD_02598_ftsB	173.805	236.573	0.444816	0.00386169
ECD_02678_rppH	107.001	78.7968	-0.441416	0.00386169
ECD_03984_basR	277.118	216.733	-0.354585	0.00386169
ECD_02952_higB	5.20555	22.0323	2.0815	0.0038636
ECD_01299_ycjF	33.047	21.6573	-0.609665	0.0038636
ECD_00698_tolR	180.511	223.785	0.310033	0.0038636
ECD_01339_trkG	5.26665	2.15448	-1.28954	0.00390509
ECD_03620_atpF	2745.98	2427.61	-0.177785	0.00390509
ECD_00784_mntR	66.4988	99.9778	0.588279	0.00391161
ECD_01396_ydcR	12.0288	6.51325	-0.885044	0.00392626
ECD_01226_tonB	23.3574	9.74992	-1.26042	0.00393133
ECD_03854_birA	55.6823	71.9245	0.369265	0.00393133
ECD_00127_yadH	70.2673	53.2529	-0.399993	0.00393212
ECD_02624_eno	1190.97	825.693	-0.528465	0.00393339
ECD_01582_manA	36.9244	24.2079	-0.609096	0.00393881
ECD_01435_yddM	25.4934	66.0995	1.37451	0.00394101
ECD_00094_ftsQ	115.196	129.316	0.16681	0.0039442
ECD_00221_dinJ	37.2481	119.18	1.67791	0.0039628
ECD_02520_csiR	9.35783	20.7432	1.14839	0.0039628
ECD_02909_ygiB	131.489	109.093	-0.269389	0.0039628
ECD_02405_yfgM	223.827	198.525	-0.173067	0.0039628
ECD_04220_yjiY	320.649	151.713	-1.07965	0.00396691
ECD_03280_glgP	19.2539	13.4549	-0.517014	0.00398057
ECD_00786_ldtB	150.976	137.919	-0.130497	0.00398252
ECD_02934_tsaD	78.6371	95.0331	0.27322	0.00400477
ECD_01627_ydhP	10.9488	20.5189	0.906178	0.00403436
ECD_03677_hemY	79.1188	92.3445	0.223005	0.00403752
ECD_02162_yfaE	300.446	216.369	-0.473614	0.00405126
ECD_03042_folP	65.778	50.647	-0.377128	0.00406735
ECD_02770_yqgC	623.023	660.463	0.0841924	0.00407961
ECD_03455_mtlD	26.6207	41.2081	0.630381	0.00409204
ECD_01022_phoH	10.4987	18.0345	0.780546	0.00409275
ECD_03797_cpxA	85.172	74.6104	-0.191004	0.00409275
ECD_01850_flhA	18.9504	5.20832	-1.86334	0.00410096
ECD_02207_nuoH	439.113	392.72	-0.16109	0.00410096
ECD_03679_hemD	102.237	80.3512	-0.347527	0.00411785
ECD_04365_ibsE	11746.4	10964.6	-0.0993563	0.00411785
ECD_00019_nhaR	9.64727	18.3296	0.925982	0.00411828
ECD_01388_ydcL	25.6883	11.7836	-1.12433	0.00412204
ECD_01552_ynfB	33.7668	72.387	1.10013	0.00412204
ECD_00931_ycbL	174.863	150.392	-0.217498	0.00412204
ECD_03922_pspG	11.8615	38.5037	1.69871	0.00413386
ECD_02492_yfiR	10.7476	23.0411	1.10019	0.00413386
ECD_00035_dapB	94.6488	78.0073	-0.278974	0.00413386
ECD_02218_yfbT	114.945	105.968	-0.117307	0.00413386
ECD_00132_panC	155.546	150.485	-0.0477221	0.00413386
ECD_00427_aes	6.93011	15.2054	1.13363	0.00413673
ECD_01918_yeeY	9.39505	18.4153	0.970931	0.00413673
ECD_03874_hemE	100.152	94.9332	-0.0772102	0.00413673
ECD_02386_bepA	20.4062	12.9085	-0.660687	0.00420431
ECD_01032_ycdY	176.224	146.366	-0.26783	0.00420431
ECD_02933_ttdT	3.81832	11.6108	1.60446	0.00421226
ECD_03337_yhiI	13.8133	26.99	0.96637	0.00423142
ECD_04191_uxuA	11.2243	5.78413	-0.956454	0.00423142
ECD_00474_lpxH	94.5052	79.0393	-0.257824	0.00423142
ECD_00029_ribF	158.886	133.448	-0.25171	0.00423142
ECD_01718_xthA	97.0361	89.548	-0.11586	0.00423142
ECD_02116_yejK	97.2668	116.253	0.257249	0.0042944
ECD_03171_rplC	7032.33	8350.48	0.247856	0.0042944
ECD_01532_hokD	1410.59	1480.7	0.0699816	0.0043032
ECD_00622_gltJ	23.4888	12.1571	-0.950173	0.00431268
ECD_00062_polB	8.81649	5.27253	-0.741709	0.00432947
ECD_01687_infC	3919.11	4001.35	0.0299622	0.00434789
ECD_00919_lpxK	72.5536	66.1203	-0.133955	0.00436065
ECD_00486_intD	12.4071	20.0168	0.690049	0.00437675
ECD_04218_yjiA	62.1283	43.3356	-0.519699	0.00437675
ECD_02778_yqgE	91.2011	64.7549	-0.494063	0.00437675
ECD_02466_rseA	115.419	150.361	0.381542	0.00437675
ECD_00873_ybjS	46.0371	57.8129	0.328595	0.00437675
ECD_00364_nusB	398.757	564.654	0.501855	0.00440774
ECD_02621	4.83123	12.9812	1.42596	0.00441147
ECD_01737_pncA	67.757	47.9348	-0.499294	0.00441646
ECD_02033	56.3152	138.37	1.29694	0.00448084
ECD_02292_ypdC	13.4909	6.79301	-0.989863	0.00449227
ECD_00130_panD	493.467	440.366	-0.16425	0.00449424
ECD_02464_rseC	60.579	37.7161	-0.683637	0.00449854
ECD_00566_ybdD	17.7012	55.9521	1.66034	0.00450249
ECD_02187_menE	35.7092	23.7358	-0.589232	0.00450548
ECD_01106_ycfJ	12.1159	33.5877	1.47103	0.00450627
ECD_02811	2.37104	9.52902	2.00681	0.00455363
ECD_03252_hslR	175.622	132.127	-0.410547	0.00455998
ECD_03291_yhhX	32.5946	12.0229	-1.43885	0.00459287
ECD_03777_fdoI	35.8183	58.5512	0.709005	0.00460061
ECD_00874_ybjT	23.8837	15.6943	-0.605789	0.00460061
ECD_04373_dinQ	2386.22	2353.82	-0.0197215	0.00460061
ECD_00219_yafK	51.0821	35.3881	-0.529551	0.00461186
ECD_04036_amiB	48.5017	42.0714	-0.205193	0.00462
ECD_00748_moaA	18.4849	10.1052	-0.871246	0.00462522
ECD_03307_livK	9.74379	4.42377	-1.13921	0.00465454
ECD_02366_tmcA	26.5097	21.5006	-0.302141	0.00466806
ECD_00185_yaeR	24.3271	44.7774	0.880208	0.00467159
ECD_03626_mioC	262.217	433.749	0.726101	0.00467179
ECD_01746_yeaC	129.625	219.362	0.75897	0.00468574
ECD_04007_cutA	44.1674	21.8882	-1.01283	0.00469412
ECD_03656_rep	40.4509	40.4645	0.000485429	0.00469412
ECD_02508_smpB	65.6205	96.1049	0.550464	0.00469412
ECD_03850_trmA	74.1349	79.5435	0.101592	0.00470098
ECD_01077_flgJ	18.1382	3.16177	-2.52022	0.00470688
ECD_00972_yccX	38.9585	83.1502	1.09378	0.00470688
ECD_02081_yeiB	25.4696	34.8195	0.451119	0.00473185
ECD_03631_kup	20.7046	14.7849	-0.485826	0.00473846
ECD_02103_yeiR	38.963	21.9386	-0.828634	0.00474789
ECD_03130_yrdA	108.33	87.3519	-0.310516	0.00474789
ECD_03014_lpoA	27.1377	23.0432	-0.235955	0.00474789
ECD_01798_kdgR	92.6607	82.9175	-0.16028	0.00474789
ECD_00639_chiQ	6.68391	22.93	1.77847	0.00476665
ECD_00143_gluQ	25.4629	16.3679	-0.637532	0.00476665
ECD_02782_yggT	116	143.605	0.307984	0.00476848
ECD_01834_ruvC	214.059	224.749	0.0703085	0.00476848
ECD_02482_clpB	153.435	94.1074	-0.705251	0.00477318
ECD_03768_yihV	12.7701	21.8007	0.771604	0.00477807
ECD_02664_mltA	56.6609	72.0859	0.347362	0.00477807
ECD_03284_glgB	15.7947	11.2944	-0.483829	0.0047948
ECD_00875_ltaE	42.9746	32.2033	-0.416277	0.0048089
ECD_03154_rpsE	6461.64	5868.87	-0.138817	0.0048089
ECD_00954_pqiA	42.012	36.2883	-0.211297	0.00484672
ECD_00114_aceF	2410.39	2110.55	-0.191647	0.00489584
ECD_00415_acrR	24.1108	13.5856	-0.827598	0.00491008
ECD_00031_lspA	346.98	426.451	0.297525	0.00491008
ECD_01971_dcd	205.514	214.486	0.0616443	0.00491008
ECD_02548_recX	7.45168	19.6718	1.40049	0.0049121
ECD_03400_yiaC	17.9169	37.4013	1.06177	0.0049121
ECD_01580_fumC	35.2225	30.3325	-0.215632	0.00491936
ECD_02965_mzrA	25.7532	48.8207	0.922745	0.00491972
ECD_00764_rhlE	51.2654	48.4664	-0.0810023	0.0049296
ECD_01594_blr	91.0754	243.286	1.41752	0.00493977
ECD_00075_leuB	14.6546	8.02337	-0.869069	0.00493977
ECD_01241_yciO	59.0597	79.0462	0.420523	0.00494965
ECD_03422_bax	67.1666	81.1313	0.272516	0.00494965
ECD_03194_tusB	119.154	78.6041	-0.600155	0.00495387
ECD_02219_yfbU	120.226	92.6825	-0.375376	0.00499279
ECD_03718_udp	91.3461	71.1659	-0.360158	0.00499718
ECD_03376_dctA	82.7191	52.737	-0.649405	0.00504043
ECD_03912_ubiA	65.2165	73.4253	0.171041	0.00504043
ECD_01224_kch	7.44058	2.43864	-1.60934	0.0050579
ECD_02388_hda	100.034	80.4906	-0.313602	0.0050579
ECD_01103_nagZ	55.7395	58.3531	0.066111	0.0050579
ECD_03671_wecF	54.887	46.5289	-0.238338	0.00508659
ECD_04250_prfC	192.309	188.281	-0.0305447	0.00509993
ECD_00372_yajL	49.3006	72.2256	0.550907	0.00510309
ECD_03235_yhfZ	12.0897	5.79299	-1.0614	0.00511112
ECD_01481_glsB	37.075	25.9728	-0.513444	0.00511186
ECD_00575_ahpF	124.726	114.527	-0.123079	0.00511423
ECD_00642_ybfE	34.6194	67.7213	0.968031	0.00511727
ECD_03152_rplO	7693.93	6917.87	-0.153393	0.00513019
ECD_03489_waaQ	46.9318	59.6949	0.34704	0.0051421
ECD_02841_pppA	30.4921	43.7048	0.519355	0.00515256
ECD_02200	80.281	102.047	0.346097	0.00516227
ECD_04047_rlmB	117.717	72.4547	-0.700169	0.00517664
ECD_03069_ptsN	148.247	124.934	-0.24684	0.00517664
ECD_01620_nemA	34.1293	23.5862	-0.533067	0.0051851
ECD_03487_waaP	43.4221	54.5582	0.329365	0.0052236
ECD_00018_nhaA	47.8477	45.5749	-0.0702112	0.00522721
ECD_00543_insJ-1	26.7641	43.816	0.711158	0.00523042
ECD_00361_nrdR	97.7741	163.304	0.740039	0.00526369
ECD_03682_cyaY	127.39	205.312	0.688563	0.00526902
ECD_02741_ygfB	152.58	163.153	0.0966566	0.00529218
ECD_03881_zraR	19.0888	27.2847	0.515366	0.00529375
ECD_00537_pheP	51.773	52.4624	0.0190847	0.00530894
ECD_01251_cysB	36.2762	20.9698	-0.79071	0.00531006
ECD_04253_yjjU	29.0506	20.8738	-0.476877	0.00534652
ECD_01320_dbpA	21.1441	13.3641	-0.661887	0.00535759
ECD_03935_soxR	7.90748	28.2006	1.83444	0.00537925
ECD_02412_yfhM	10.7591	9.79373	-0.135622	0.00544192
ECD_02914_yqiC	46.5749	93.1166	0.999486	0.00547377
ECD_00188_yaeP	111.403	313.734	1.49375	0.00553556
ECD_02910_ygiC	106.634	79.2161	-0.428796	0.00554543
ECD_00631_asnB	51.1087	34.9366	-0.548832	0.00555039
ECD_02458_pdxJ	68.4798	50.5513	-0.43793	0.00555039
ECD_02367_ypfJ	65.9945	73.7333	0.159972	0.00555738
ECD_03609_pstB	66.0494	49.6507	-0.411731	0.00556609
ECD_00270_betT	18.833	14.7116	-0.356303	0.00556609
ECD_02682_tas	47.1963	36.6562	-0.364616	0.0055806
ECD_03055_ibaG	236.724	287.413	0.279924	0.0055806
ECD_03401_bisC	31.8133	28.6738	-0.149898	0.00559647
ECD_03486_waaO	29.2879	38.6214	0.3991	0.00561755
ECD_00696_ybgC	180.01	155.829	-0.208114	0.00561755
ECD_03213_yhfG	76.144	156.661	1.04085	0.00562779
ECD_02731_yqfA	22.8086	37.1033	0.701968	0.00563386
ECD_00073_leuD	37.9244	61.8551	0.705765	0.00564704
ECD_02456_yfhL	23.1113	78.6347	1.76657	0.00565924
ECD_01269_sapC	25.1564	8.86683	-1.50444	0.00565924
ECD_01763_yeaP	24.9145	16.0849	-0.631281	0.00565924
ECD_03601_cbrC	12.0326	27.6354	1.19957	0.00566407
ECD_02488_pheA	43.621	31.9142	-0.450824	0.00566407
ECD_03375_yhjJ	35.2027	43.8653	0.317395	0.00566407
ECD_02368_purC	87.1516	107.421	0.301677	0.00566407
ECD_01130_hflD	96.7946	91.3443	-0.0836128	0.00566407
ECD_00282_yahM	5.85543	28.5942	2.28788	0.00570875
ECD_04273_creA	63.8726	89.5198	0.487008	0.00570875
ECD_03875_nfi	84.3902	81.979	-0.0418215	0.00570875
ECD_00759_ybhR	13.825	7.99778	-0.789613	0.00571326
ECD_01838_yecD	36.8456	57.4646	0.641182	0.00571326
ECD_00383_cyoA	1085.57	844.718	-0.361913	0.00575853
ECD_03038_argG	113.522	88.5748	-0.358009	0.00576405
ECD_03153_rpmD	11934.3	10882.2	-0.133149	0.00579063
ECD_02411_pbpC	4.83385	8.64986	0.839504	0.00581491
ECD_00763_ybiH	34.5741	21.796	-0.665625	0.00582356
ECD_01227_yciA	116.749	88.573	-0.398472	0.00583362
ECD_01724_ynjC	6.20023	3.0826	-1.00817	0.0058784
ECD_02832	14.0806	5.98322	-1.23472	0.00588277
ECD_02335_amiA	45.1001	28.055	-0.684874	0.00588694
ECD_02129_napC	7.71345	17.5303	1.1844	0.00589114
ECD_03796_yiiM	30.8363	47.9596	0.637189	0.0059061
ECD_00854_grxA	40.0251	73.0718	0.86841	0.00591405
ECD_00670_ybgI	58.3245	69.7384	0.25785	0.00592414
ECD_01644_ydhZ	25.678	57.7902	1.17029	0.00593491
ECD_03786	1.37726	3.81306	1.46915	0.00596018
ECD_01593_ydgJ	38.1303	21.426	-0.831574	0.00596018
ECD_02787_ansB	2.3257	9.30557	2.00043	0.00597694
ECD_03275_glpG	96.4215	86.7941	-0.151756	0.00597694
ECD_01730_gdhA	50.7534	45.9889	-0.14222	0.00599786
ECD_03659_trxA	1491.37	1793.94	0.266492	0.00600725
ECD_03523	8.96454	17.7275	0.983689	0.00602885
ECD_02441_yphG	2.6832	4.69957	0.808571	0.00603557
ECD_03653_ppiC	240.795	343.472	0.512388	0.00603557
ECD_01099_hinT	176.133	214.649	0.28532	0.00603557
ECD_00083_rsmH	159.921	180.735	0.17652	0.00604328
ECD_02188_menC	76.8986	67.6053	-0.185821	0.00604466
ECD_02538_ygaH	83.1984	53.9041	-0.62616	0.00604669
ECD_04159_fecI	14.8504	5.29988	-1.48647	0.00614446
ECD_01179_pth	88.541	71.8885	-0.300584	0.00615613
ECD_03861_rplJ	10211	12025.1	0.235918	0.00616588
ECD_03251_yrfG	106.653	102.399	-0.0587165	0.00616588
ECD_04121_rraB	264.095	372.712	0.497005	0.00616682
ECD_01755_yeaJ	6.30914	10.6203	0.751315	0.00618478
ECD_00746_uvrB	45.9122	38.487	-0.254508	0.00618478
ECD_04092_tamB	34.2227	39.5475	0.208632	0.00618478
ECD_03849_yijD	166.972	153.809	-0.118471	0.00618478
ECD_03736_fadA	10.5779	17.0741	0.69075	0.00619714
ECD_01137_bluR	16.0923	26.1573	0.700841	0.00622494
ECD_02392_purN	93.0011	106.262	0.192308	0.00625308
ECD_03608_phoU	68.83	55.5948	-0.308088	0.00626575
ECD_00198_metN	57.8098	38.7954	-0.575429	0.00627286
ECD_03043_ftsH	518.029	499.596	-0.0522694	0.00628781
ECD_04018_ecnA	343.395	693.572	1.01418	0.00631218
ECD_01257_yciM	33.685	27.8757	-0.273095	0.00631218
ECD_02230_yfcI	4.82588	9.8445	1.02852	0.00632266
ECD_04259_deoB	66.9308	76.4217	0.191312	0.00632266
ECD_03512_xanP	37.3284	33.767	-0.144661	0.00634374
ECD_00299_lacI	27.2453	37.0535	0.443605	0.00637799
ECD_03125_yhdV	34.8337	85.1782	1.29	0.00638886
ECD_03064_lptC	92.5302	94.583	0.0316571	0.00638886
ECD_04233_lgoT	4.43646	8.55252	0.946941	0.00639362
ECD_01630_ydhB	15.9908	25.1204	0.651612	0.00639362
ECD_03744_yihD	186.845	231.973	0.312117	0.00639362
ECD_02738_ubiI	43.1246	38.1524	-0.176737	0.00639362
ECD_03499_pyrE	165.565	118.569	-0.481667	0.00641055
ECD_02089_yeiI	22.9364	14.7272	-0.639155	0.0064141
ECD_03265_gntX	70.3964	75.5336	0.101616	0.00642115
ECD_04391	45.4761	161.561	1.82889	0.0064503
ECD_02490_aroF	22.9674	31.6693	0.463495	0.00645394
ECD_03800_fieF	65.1964	86.1008	0.401235	0.00646051
ECD_00793_moeB	52.9375	69.6793	0.396439	0.00648957
ECD_04067_rpsF	4128.87	5665.95	0.45657	0.0064942
ECD_01615_ydhK	9.19378	5.8506	-0.652073	0.00650679
ECD_03525	24.7806	48.6283	0.972582	0.00652357
ECD_00930_ycbK	90.9327	94.6157	0.0572804	0.00652357
ECD_03201_kefB	20.7851	26.6739	0.359877	0.00652547
ECD_02781_yggS	54.199	74.9362	0.467397	0.00653041
ECD_00887_clpA	123.517	110.244	-0.16401	0.00656075
ECD_00321_yaiT	3.50897	6.49047	0.887275	0.00656591
ECD_03464_trmL	67.5494	91.256	0.433976	0.00658651
ECD_01229_yciC	20.8899	12.8828	-0.697361	0.00658742
ECD_00858_ybjN	110.499	137.658	0.317047	0.00662828
ECD_00558_entS	6.59261	3.13853	-1.07076	0.00663171
ECD_03462_lldR	12.0818	5.75207	-1.07069	0.00663171
ECD_03570_ibpA	96.4435	47.3382	-1.02668	0.00663171
ECD_01577_rstA	34.0552	23.6641	-0.525175	0.00663171
ECD_00115_lpd	2043.93	1910.06	-0.0977262	0.006661
ECD_00794_moeA	55.5349	57.2539	0.0439785	0.00667864
ECD_00010_satP	93.59	84.6567	-0.144729	0.00669007
ECD_00472_purK	105.035	82.4394	-0.349461	0.00671477
ECD_00594_flc	48.5782	72.5317	0.578304	0.00672488
ECD_03204_yheT	44.7497	39.7328	-0.171549	0.00673235
ECD_01635_ydhQ	32.5527	36.6078	0.169372	0.00673235
ECD_04011_yjeH	11.274	6.51536	-0.791085	0.00673409
ECD_01923_hisC	22.0121	14.3611	-0.616131	0.0067681
ECD_00855_ybjC	224.922	180.376	-0.318422	0.0067681
ECD_03454_mtlA	17.6439	12.6659	-0.478224	0.00682924
ECD_00310_frmA	57.0567	55.6395	-0.0362848	0.00683799
ECD_04145_insN	14.223	40.8388	1.52171	0.00685784
ECD_00162_yaeH	28.4508	52.2967	0.878252	0.00690666
ECD_02926_cca	38.0463	42.096	0.145927	0.00690728
ECD_03504_ligB	2.43743	5.8987	1.27504	0.00693895
ECD_00620_insK-2	63.6681	62.4378	-0.0281523	0.0069775
ECD_01571_pntB	46.2557	46.5133	0.00801193	0.00700505
ECD_01235_trpB	24.9787	15.3342	-0.703947	0.00701923
ECD_03298_ugpQ	36.2275	50.5982	0.482	0.00701923
ECD_02541_emrB	56.4993	42.277	-0.418359	0.00701923
ECD_02544_yqaA	116.017	111.608	-0.0558868	0.00708753
ECD_01734_ydjA	70.3514	109.252	0.635002	0.00709091
ECD_03314_rsmD	64.6961	52.3016	-0.306825	0.00709758
ECD_03191_fusA	4161.63	3502.2	-0.248886	0.00709758
ECD_00160_degP	33.8696	17.8892	-0.920904	0.00711906
ECD_03629_viaA	17.2988	12.116	-0.513758	0.00712606
ECD_02071_yohK	5.02378	13.4776	1.42372	0.00713063
ECD_03403_ghrB	52.8143	40.105	-0.397146	0.00716975
ECD_01544_ydfD	337.691	293.648	-0.201616	0.00716975
ECD_02326_ucpA	59.741	71.613	0.2615	0.00717519
ECD_01318_ydaM	3.93289	7.62933	0.955967	0.00718454
ECD_03558_yidF	19.3284	35.0641	0.859269	0.00723785
ECD_03951_fdhF	13.227	17.2472	0.382877	0.00727846
ECD_04293_sgrT	13950	9317.91	-0.582185	0.00731765
ECD_02247_yfcJ	55.326	54.2794	-0.027552	0.00733286
ECD_02334_ypeA	43.8483	74.0072	0.755145	0.00733743
ECD_02665_amiC	50.3601	51.318	0.0271838	0.00734317
ECD_01781_yoaH	46.8349	117.051	1.32148	0.00737258
ECD_00159_dgt	9.4146	5.77274	-0.705643	0.00737621
ECD_03517	29.8841	24.1842	-0.305313	0.00743344
ECD_00208_dnaQ	49.7593	56.1455	0.174203	0.00745761
ECD_02229_yfcH	76.901	88.3771	0.200671	0.00753419
ECD_02175_yfaY	30.4483	34.2367	0.16918	0.00757705
ECD_00432_ybaK	68.7135	90.6034	0.39897	0.0075932
ECD_02467_rpoE	111.141	125.023	0.169802	0.0075932
ECD_01264_yciW	6.76055	2.87628	-1.23293	0.00761873
ECD_00672_ybgK	50.5108	42.0738	-0.263668	0.00764317
ECD_00148_mrcB	53.8521	46.3218	-0.217309	0.00764506
ECD_03282_glgC	19.3095	14.0519	-0.458539	0.0076464
ECD_01621_gloA	119.773	131.162	0.131051	0.00765826
ECD_01351_hslJ	104.255	125.73	0.270212	0.00766604
ECD_02726_xerD	42.9669	54.4985	0.34299	0.00767243
ECD_02404_bamB	255.471	219.421	-0.219459	0.00767243
ECD_01986_yegQ	62.8468	61.7506	-0.025386	0.00767796
ECD_03131_yrdB	173.665	126.505	-0.457112	0.00767805
ECD_03281_glgA	23.6689	17.538	-0.432506	0.00769125
ECD_00375_yajR	36.4072	39.8979	0.132088	0.00769224
ECD_04091_tamA	16.5982	10.9331	-0.602324	0.00769448
ECD_04258_deoA	17.3784	11.447	-0.602323	0.00769448
ECD_01274_puuA	24.5433	20.0564	-0.29126	0.00769448
ECD_04079_fklB	305.613	267.15	-0.194053	0.00772946
ECD_03574_dgoT	1.61512	4.47707	1.47091	0.00773044
ECD_02944_ebgR	8.42306	4.07807	-1.04646	0.00774035
ECD_02359_aegA	4.58427	7.75225	0.757923	0.00774143
ECD_03155_rplR	6885.1	6771.57	-0.0239882	0.0077935
ECD_03160_rplX	7673.52	10447.7	0.445231	0.00781809
ECD_01390_insQ	24.5128	18.0467	-0.441801	0.00782279
ECD_01603_nth	29.3611	9.39401	-1.64409	0.00788323
ECD_02610_queD	73.9565	108.773	0.556569	0.00788323
ECD_03848_fabR	100.76	104.493	0.0524942	0.0078873
ECD_01679_btuE	28.4129	17.3222	-0.713918	0.00789661
ECD_02527_ygaC	3.95639	15.4141	1.962	0.00789889
ECD_04249_yjjG	74.0421	72.4998	-0.0303679	0.00790066
ECD_03810_glpX	34.3489	28.0794	-0.290753	0.00797147
ECD_00358_yajD	49.1553	86.8259	0.820778	0.00799894
ECD_00059_djlA	49.5508	50.837	0.0369718	0.00799894
ECD_01391_ydcO	21.5032	14.3021	-0.588321	0.00800392
ECD_02251_epmC	64.4349	38.2081	-0.753965	0.00801985
ECD_02661_csdA	60.6343	83.4191	0.460244	0.00804732
ECD_04000_lysU	38.9113	37.8357	-0.040438	0.0080745
ECD_00439_ybbJ	21.381	46.6994	1.12708	0.00810024
ECD_00852_ybjL	17.3046	13.8506	-0.321207	0.00810024
ECD_00767_ybiB	45.0366	39.5692	-0.186719	0.00810024
ECD_03458_yibL	124.556	131.637	0.0797659	0.00810024
ECD_01104_ycfP	69.5162	86.6017	0.317047	0.00810834
ECD_02082_folE	107.472	81.6885	-0.395755	0.00813038
ECD_01259_yciH	136.224	146.894	0.108797	0.00814355
ECD_01894_amn	15.5279	10.8606	-0.515757	0.00817174
ECD_02163_inaA	62.3591	54.3521	-0.198264	0.00817962
ECD_04274_creB	47.3925	62.3521	0.39578	0.00818376
ECD_00606_rsfS	266.161	256.352	-0.0541768	0.00819714
ECD_04081_ytfE	12.6859	28.8561	1.18564	0.0082039
ECD_03383_yhjR	88.5273	143.875	0.700623	0.00821576
ECD_03073_mtgA	34.4356	50.021	0.538636	0.00821576
ECD_02747_argP	35.1843	26.1865	-0.42611	0.00822576
ECD_01181_dauA	22.6419	17.6905	-0.356021	0.00822767
ECD_03463_lldD	13.9371	8.77226	-0.667912	0.00823006
ECD_03322_yhhS	35.0775	30.1954	-0.216221	0.00823006
ECD_03876_yjaG	76.2525	76.825	0.0107899	0.00823006
ECD_00373_panE	29.4815	37.4366	0.34464	0.00825656
ECD_03183_gspK	1.80008	4.93465	1.45489	0.00827354
ECD_01827_mepM	34.0293	29.3575	-0.213049	0.00827354
ECD_01723_ynjB	7.97012	3.75506	-1.08577	0.00827374
ECD_00799_gsiD	7.76084	3.47303	-1.16002	0.00828698
ECD_03017_yraP	81.0066	90.0321	0.152399	0.00828698
ECD_00026	666.735	1123.79	0.753189	0.00828724
ECD_04231_hpaR	6.36952	17.3299	1.444	0.0082934
ECD_04276_creD	1.66218	4.45343	1.42184	0.00833039
ECD_03195_tusC	76.0229	41.5575	-0.871325	0.00833054
ECD_04238_dnaC	36.2133	51.1308	0.497674	0.00833054
ECD_04262_lplA	38.8462	33.2633	-0.223842	0.00834071
ECD_04094_yzfA	191.524	333.235	0.799011	0.00835266
ECD_01101_lpoB	87.0863	74.0528	-0.23389	0.00835266
ECD_00864_rlmC	31.7273	37.7887	0.252229	0.00835449
ECD_00634_nagA	42.9807	43.1328	0.00509624	0.00838212
ECD_01019_efeU	47.6286	41.2547	-0.207271	0.00840117
ECD_01262_gmr	11.185	14.6532	0.389657	0.00840227
ECD_00233_gpt	307.52	372.831	0.27784	0.00840227
ECD_01214_tdk	28.9879	18.8949	-0.617452	0.0084133
ECD_01762_yoaF	73.5936	124.013	0.752835	0.00844101
ECD_03689_uvrD	64.1176	65.6591	0.0342735	0.00846088
ECD_00671_ybgJ	59.5528	66.5972	0.161291	0.00849715
ECD_03165_rpsC	5443.35	5260.07	-0.0494112	0.00849715
ECD_00921_ycaR	276.416	343.168	0.312075	0.00849726
ECD_03344_uspA	69.1888	102.451	0.566327	0.00852517
ECD_01134_icd	628.949	470.533	-0.418649	0.00852849
ECD_00925_smtA	60.2772	66.5439	0.142694	0.00852849
ECD_02489_tyrA	33.1174	54.2743	0.712679	0.00854711
ECD_03630_ravA	12.1331	8.03947	-0.593774	0.00856032
ECD_01374_cybB	49.1045	36.7362	-0.418653	0.00856032
ECD_02459_recO	61.6387	52.8126	-0.222955	0.00856032
ECD_00536_cusA	52.2447	26.2051	-0.995436	0.00859646
ECD_03642_hdfR	19.1297	26.5863	0.474866	0.00861286
ECD_03551_uhpC	17.7575	12.7627	-0.476491	0.00861354
ECD_03865_yjaZ	8.89088	17.8914	1.00887	0.00866248
ECD_02784_rdgB	97.2865	84.2832	-0.206994	0.00866248
ECD_00929_ldtD	15.9807	13.169	-0.279184	0.00868939
ECD_01189_ychA	64.9359	61.2384	-0.0845792	0.00868939
ECD_01367_azoR	29.8656	18.9159	-0.658891	0.0086899
ECD_00319_hemB	256.746	201.036	-0.352888	0.0086899
ECD_02301_mntH	27.6905	23.9109	-0.211719	0.0086899
ECD_02880_exbB	61.3168	39.7136	-0.626649	0.00869705
ECD_00808_ybjG	64.2166	78.3483	0.286956	0.00869705
ECD_01245_rluB	144.539	191.849	0.408517	0.00870321
ECD_02542_luxS	350.464	366.52	0.0646247	0.00870321
ECD_04107_treC	4.16979	1.93186	-1.10998	0.00870598
ECD_00145_sfsA	44.9955	49.5337	0.138629	0.00871319
ECD_02101_yeiP	124.21	150.904	0.280847	0.00871576
ECD_02332_yfeY	27.4895	42.0068	0.611744	0.0087416
ECD_03809_fpr	48.0841	38.0738	-0.336761	0.00874211
ECD_00333_proC	48.8835	47.4089	-0.0441915	0.00877727
ECD_00346_sbcD	22.929	15.674	-0.548801	0.00878962
ECD_00412_tomB	47.9336	68.7698	0.520739	0.00883398
ECD_03559_yidG	8.32598	20.4034	1.29312	0.00888752
ECD_02445_glnB	234.127	275.209	0.233238	0.00891206
ECD_00067_yabI	25.0207	36.9375	0.56196	0.00891453
ECD_01149_minE	171.888	162.025	-0.0852563	0.00891453
ECD_01216_ychE	27.2324	41.9639	0.623824	0.00895191
ECD_02481_kgtP	24.5759	32.1204	0.386243	0.00896042
ECD_03336_rbbA	6.43092	4.03897	-0.671038	0.00898588
ECD_02495_rplS	4516.8	5654.51	0.324101	0.00898588
ECD_00047_fixC	6.24527	12.6543	1.01879	0.00901023
ECD_02879_exbD	60.618	79.557	0.392243	0.00901023
ECD_03283_glgX	14.437	11.004	-0.391742	0.00901023
ECD_03513_yicH	24.9014	25.4657	0.0323303	0.00901023
ECD_02236_ubiX	60.6783	74.722	0.300353	0.00901925
ECD_00394_ybaV	10.3589	23.3538	1.17279	0.0090763
ECD_03273_rtcR	8.97995	14.1959	0.660697	0.0090763
ECD_03758_yihM	4.34951	1.71962	-1.33876	0.00914451
ECD_02333_yfeZ	41.6742	59.547	0.514874	0.00914451
ECD_02246_flk	38.5078	34.0409	-0.177884	0.00914451
ECD_03815_menA	51.5101	55.8479	0.116648	0.00914451
ECD_00956_pqiC	64.3182	61.95	-0.054122	0.00917767
ECD_00598_ybeF	4.00454	7.83754	0.968765	0.00918784
ECD_02849_glcC	3.31445	8.54874	1.36694	0.00919684
ECD_00220_yafQ	12.8424	28.3703	1.14346	0.00919721
ECD_01828_znuA	36.1377	30.2739	-0.255427	0.00921758
ECD_03138_fmt	180.526	188.547	0.0627207	0.00923418
ECD_02462_lepB	201.431	230.238	0.192841	0.00926848
ECD_04171_sgcX	1.52931	4.34945	1.50795	0.00932301
ECD_02474_ung	47.4505	50.5597	0.0915647	0.00933535
ECD_03317_yhhN	32.0723	20.9081	-0.617265	0.00933767
ECD_02963_exuR	37.6158	29.8083	-0.335626	0.00933767
ECD_01839_yecE	13.8042	21.7925	0.658725	0.00934194
ECD_01410_ansP	23.7076	22.1357	-0.0989738	0.00935125
ECD_02170_yfaD	2.85815	6.53804	1.19378	0.00936677
ECD_00199_gmhB	64.1916	68.7776	0.0995545	0.00936963
ECD_02685_galR	25.7997	19.2586	-0.421853	0.00937403
ECD_00534_cusF	187.347	106.556	-0.814103	0.00938248
ECD_00095_ftsA	145.735	177.512	0.284571	0.00938248
ECD_02968_yqjE	88.6415	95.1805	0.102683	0.00938248
ECD_00478_ybcJ	353.935	363.64	0.0390247	0.0094135
ECD_02083_yeiG	12.9643	7.4112	-0.806764	0.00942741
ECD_02821	16.2792	25.8983	0.66983	0.00943249
ECD_03496_dfp	80.7658	67.7196	-0.254172	0.00943626
ECD_01056_bssS	35.4867	114.973	1.69594	0.00943637
ECD_00805_gstB	52.4045	60.6262	0.21025	0.00943637
ECD_02962_exuT	4.27253	8.60128	1.00946	0.00948079
ECD_03690	14.8418	21.6399	0.544032	0.00948079
ECD_01710_cho	11.5765	6.27872	-0.882651	0.00950901
ECD_04005_yjdC	43.6631	33.1081	-0.399231	0.00950901
ECD_01131_mnmA	114.054	86.8439	-0.393218	0.00951189
ECD_03733_rfaH	58.1289	76.3333	0.393056	0.00951189
ECD_03730_tatB	274.946	283.172	0.0425331	0.00951189
ECD_01078_flgK	14.7923	4.85188	-1.60823	0.00951388
ECD_04330_yoeB	594.397	922.142	0.633563	0.00955183
ECD_03096_mdh	334.236	316.507	-0.078631	0.00960656
ECD_02882_yghB	33.9467	24.1778	-0.489589	0.00962171
ECD_00893_lrp	205.7	203.157	-0.0179503	0.00966864
ECD_03370_yhjD	9.56891	5.27827	-0.858289	0.00967314
ECD_01929_wzzB	206.355	164.004	-0.331396	0.00967734
ECD_03746_dsbA	178.041	145.278	-0.293391	0.00969309
ECD_01890_mtfA	12.7265	7.40317	-0.781625	0.00970453
ECD_00156_yadS	40.9838	56.8887	0.47309	0.00972281
ECD_03097_argR	137.079	124.635	-0.13729	0.00972336
ECD_02867_hybF	125.159	112.997	-0.147488	0.00972998
ECD_02835	28.5401	15.8489	-0.848606	0.00973341
ECD_01223_clsA	19.5157	16.289	-0.260733	0.0097373
ECD_03798_cpxR	135.103	152.78	0.177401	0.00974116
ECD_02504_recN	19.1072	21.3265	0.158534	0.00974116
ECD_00817	45.3192	31.6342	-0.518634	0.0097734
ECD_00641_fldA	292.735	321.156	0.133677	0.00979545
ECD_01108_bhsA	14.5613	31.684	1.12162	0.00981211
ECD_00191_nlpE	26.6021	48.0174	0.852015	0.00987959
ECD_00366_pgpA	107.651	111.773	0.0541997	0.00990369
ECD_04186_fimD	0.418224	1.4486	1.79231	0.00992561
ECD_03622_atpB	1087.03	899.323	-0.273482	0.00994754
ECD_03321_dcrB	212.647	251.456	0.241848	0.00996833
ECD_02102_yeiQ	8.15364	4.60236	-0.82507	0.00998904
ECD_01105_ndh	186.133	235.54	0.33964	0.00998904
ECD_02483_yfiH	79.647	75.2943	-0.0810793	0.00998904
ECD_02666_argA	24.3733	22.2139	-0.133835	0.00999925
ECD_03610_pstA	41.7947	28.2089	-0.567169	0.010002
ECD_03825_metB	32.5276	27.8727	-0.222814	0.0100724
ECD_03016_diaA	68.1077	64.1696	-0.0859265	0.0100912
ECD_02545_yqaB	53.3386	86.1538	0.691734	0.010103
ECD_01787_manX	110.077	77.0672	-0.514319	0.010103
ECD_02900_mdaB	78.8388	114.683	0.540676	0.0101131
ECD_03289_gntR	45.2511	42.2503	-0.0989935	0.0101131
ECD_03288_gntK	99.7843	83.8862	-0.250379	0.010176
ECD_01165_dadX	66.2062	62.2038	-0.0899619	0.0102006
ECD_01095_holB	73.9969	50.8855	-0.540209	0.0102321
ECD_01747_msrB	142.567	182.665	0.357558	0.0102768
ECD_02119_yejO	2.05268	3.70402	0.851583	0.0102932
ECD_01093_yceG	33.7937	48.4818	0.520687	0.0103369
ECD_01378_trg	2.5524	5.29662	1.05322	0.0104215
ECD_00434_ybaQ	51.2544	73.0498	0.511203	0.0104215
ECD_03773_yiiD	51.8729	49.4861	-0.0679569	0.0104215
ECD_03305_livM	8.93034	4.9412	-0.853853	0.0104385
ECD_01076_flgI	23.0938	3.95428	-2.54602	0.0104526
ECD_01126_roxA	81.0351	79.2376	-0.0323613	0.0104709
ECD_00431_ushA	14.2795	16.9091	0.243855	0.0105406
ECD_01790_yobD	22.1058	12.4823	-0.824536	0.010571
ECD_01692_pfkB	20.5358	13.9094	-0.562077	0.0106238
ECD_00846	4.35104	11.4743	1.39897	0.0106242
ECD_00131_yadD	9.60993	18.2997	0.929225	0.0106435
ECD_00442_fetB	9.34517	4.84563	-0.947536	0.0106616
ECD_02855	3.79341	7.12507	0.909411	0.0106616
ECD_00816	184.516	106.997	-0.786179	0.0106616
ECD_02769_yqgB	1224.52	1263.92	0.0456933	0.0106616
ECD_03078_gltD	52.4778	67.8665	0.370992	0.0106644
ECD_00753_ybhL	40.148	36.7318	-0.128298	0.0106644
ECD_01194_chaA	21.8618	17.2631	-0.340724	0.0106886
ECD_03707_metR	26.4699	32.6833	0.304205	0.0106886
ECD_01127_phoQ	24.1201	21.6852	-0.153528	0.0106964
ECD_03018_yraQ	19.8081	25.6447	0.372569	0.0107234
ECD_03956_alsK	2.26715	5.83733	1.36443	0.0107267
ECD_01598_rsxB	57.2879	68.6311	0.260631	0.0107267
ECD_02628_mazE	69.3908	118.029	0.76633	0.010729
ECD_02794_nupG	10.9692	7.05462	-0.636821	0.010729
ECD_01756_yeaK	30.8432	45.2872	0.554153	0.010729
ECD_02725_dsbC	62.8112	61.4831	-0.0308303	0.010729
ECD_01154_ycgL	96.2208	121.998	0.342438	0.0107522
ECD_00831	24.8645	17.5314	-0.504145	0.0107532
ECD_02421_iscU	528.764	531.985	0.00876108	0.0107594
ECD_02321_cysM	40.5921	46.8652	0.207318	0.010824
ECD_03263_yhgA	7.91922	13.7869	0.799868	0.0109358
ECD_02753_yggE	40.9466	41.5262	0.0202771	0.0109966
ECD_04055_yjfN	11.6892	29.038	1.31277	0.011022
ECD_04122_yjgM	23.6956	40.8655	0.786262	0.011022
ECD_00705_zitB	24.6587	16.2485	-0.601786	0.01104
ECD_02881_metC	16.2511	11.1623	-0.541908	0.011086
ECD_00309_frmB	19.4557	26.09	0.423307	0.0111566
ECD_02592_nlpD	128.658	105.498	-0.286329	0.0111935
ECD_04247_holD	164.065	198.172	0.272479	0.0111941
ECD_00600_ybeD	196.37	173.519	-0.178486	0.0111941
ECD_02087_yeiH	8.33595	13.9695	0.74486	0.0112335
ECD_03741_hemG	56.1173	64.565	0.202307	0.0112858
ECD_01042_ymdB	11.8446	21.7083	0.874022	0.0113094
ECD_01936_wbbD	26.6917	37.7341	0.499481	0.0113094
ECD_02305_yfeD	26.3665	43.547	0.723871	0.0113224
ECD_01379_ydcI	27.2637	28.6644	0.0722829	0.0113639
ECD_02287_yfdY	24.7623	82.0172	1.72778	0.0113858
ECD_00657_ybfA	70.3533	114.961	0.708454	0.0113858
ECD_02890_plsC	41.0774	30.0779	-0.449637	0.0114852
ECD_00247_ykgJ	6.11536	16.9179	1.46804	0.01158
ECD_03156_rplF	7149.26	6943.41	-0.0421484	0.0116084
ECD_02298_glk	30.2438	30.1698	-0.00353456	0.0116188
ECD_03086_nanR	42.5614	48.8654	0.199266	0.0116624
ECD_01197_ychN	99.4108	104.362	0.0701232	0.0116624
ECD_00684_sdhB	434.696	344.107	-0.337148	0.0116751
ECD_01100_ycfL	122.245	128.86	0.0760271	0.011688
ECD_03151_secY	5453.83	4870.38	-0.163234	0.0116962
ECD_01925_hisH	42.557	33.1353	-0.361029	0.0117368
ECD_03041_glmM	144.773	155.546	0.103554	0.0118296
ECD_02034	37.4773	69.4012	0.888944	0.0118449
ECD_00405_ybaY	17.4045	27.8518	0.678309	0.0118633
ECD_02228_folX	108.336	106.566	-0.0237649	0.0118955
ECD_00033_ispH	176.234	147.435	-0.257414	0.0119006
ECD_00783	21.9181	58.4658	1.41547	0.011904
ECD_00990_gfcA	8.38873	22.8405	1.44507	0.0119253
ECD_03264_bioH	55.588	51.1592	-0.119779	0.0119678
ECD_03488_waaG	42.7009	55.2405	0.371461	0.0119873
ECD_03708_metE	23.689	21.1418	-0.164121	0.012004
ECD_00124_hpt	398.339	421.484	0.0814834	0.012004
ECD_00003_thrB	217.336	167.742	-0.373679	0.0120067
ECD_00673_ybgL	45.0454	35.2557	-0.353522	0.0120223
ECD_01168_emtA	47.5314	54.9847	0.210148	0.0120223
ECD_00610_lptE	256.724	319.187	0.314182	0.0120228
ECD_02783_yggU	97.6456	121.948	0.320637	0.0120295
ECD_04016_epmB	39.3222	32.6271	-0.269272	0.0120295
ECD_00269_betI	63.1207	57.2588	-0.140616	0.0120295
ECD_00084_ftsL	126.566	142.883	0.174937	0.0120581
ECD_02469_trmN	43.2627	31.5321	-0.456299	0.0120582
ECD_02318_pdxK	39.773	39.3343	-0.0160026	0.0120752
ECD_01984_baeR	29.1508	20.5387	-0.505186	0.0121101
ECD_00769_ybiJ	26.34	48.898	0.89252	0.0121318
ECD_01831_ruvB	70.512	83.0695	0.236451	0.0121318
ECD_01685_rplT	5713.51	5078.87	-0.16987	0.0121579
ECD_01138_bluF	4.05496	1.7244	-1.23359	0.012184
ECD_00688_sucD	651.233	474.074	-0.458061	0.0122088
ECD_03460	4.52319	5.49032	0.279551	0.0122272
ECD_01833_yebB	16.4294	9.91067	-0.729222	0.0122559
ECD_01234_trpA	21.4638	14.6735	-0.548693	0.0122872
ECD_02224_yfcD	164.736	227.835	0.467832	0.0122966
ECD_02303_yfeA	10.0802	9.16717	-0.136969	0.0122991
ECD_04248_rimI	101.282	107.101	0.0805906	0.0123109
ECD_02766_loiP	66.5607	55.5935	-0.259753	0.0123512
ECD_01023_pgaD	1.33594	8.13969	2.60712	0.01237
ECD_01275_puuD	32.3876	25.3711	-0.352255	0.0123866
ECD_00806_dacC	19.972	19.833	-0.0100738	0.0124203
ECD_01816_ptrB	6.51907	4.37562	-0.57518	0.0124217
ECD_02166_glpT	4.76886	2.47645	-0.945368	0.0124671
ECD_03164_rplP	6470.45	6283.06	-0.0423981	0.0124671
ECD_02558_srlQ	25.2096	18.4281	-0.452063	0.0124712
ECD_03079_yhcG	5.91293	14.5494	1.29901	0.0124796
ECD_00880_aqpZ	6.69675	14.7859	1.14269	0.0125125
ECD_03019_yraR	9.12084	19.262	1.07852	0.0125125
ECD_03882_purD	89.6666	83.1046	-0.109642	0.012554
ECD_03683_yzcX	121.734	179.655	0.561497	0.0125669
ECD_03011_yraJ	2.09256	3.84203	0.8766	0.0125863
ECD_04204_yjiM	2.86411	0.973102	-1.55743	0.0125903
ECD_02692_yqeF	38.5056	27.5395	-0.483567	0.0125903
ECD_01210_rssA	22.6187	18.3458	-0.30206	0.0125903
ECD_03700_pldA	50.7743	44.7475	-0.182289	0.0126025
ECD_01919_yeeZ	39.0589	31.0546	-0.330845	0.0126254
ECD_01052_yceI	17.7296	9.71794	-0.867434	0.012641
ECD_00699_tolA	94.8997	83.1984	-0.189846	0.0126501
ECD_01868_araG	1.74513	3.92092	1.16786	0.0126613
ECD_01261_yciT	40.0719	30.8634	-0.376697	0.0126613
ECD_01938_wzy	23.0517	25.9578	0.171293	0.0126886
ECD_02683_lplT	22.5411	27.4943	0.286572	0.0127306
ECD_00768_ybiC	38.8372	40.3866	0.0564368	0.0127306
ECD_00197_metI	75.9101	66.8403	-0.183573	0.0127762
ECD_00380_cyoD	1566.42	1209.06	-0.373578	0.0128349
ECD_03560_yidH	9.31005	20.8119	1.16055	0.0128742
ECD_01308_ynaI	4.48763	2.12536	-1.07825	0.0129108
ECD_03379_bcsZ	30.65	18.3201	-0.742463	0.0130208
ECD_01573_ydgH	127.474	92.5533	-0.461843	0.0130208
ECD_03704_pldB	63.8421	47.2307	-0.434783	0.0130208
ECD_02509	22.6182	23.8984	0.0794293	0.013093
ECD_04308_yciY	84.7326	147.417	0.798914	0.0130933
ECD_00701_pal	1699.12	1456.67	-0.222115	0.0131108
ECD_01933_manC	16.7091	16.889	0.0154468	0.0131124
ECD_03739_yigZ	77.8247	85.7245	0.139478	0.0131215
ECD_02186_pmrD	48.5998	91.3486	0.910432	0.0131442
ECD_00648_potE	2.329	4.91941	1.07877	0.0131705
ECD_02779_yqgF	83.57	63.0676	-0.406086	0.013185
ECD_01557_ynfF	3.95483	2.25288	-0.811844	0.0132098
ECD_02329_murP	13.8869	10.0697	-0.463696	0.0132098
ECD_01928_hisI	59.4425	49.3818	-0.267516	0.0132656
ECD_02996_agaR	38.7055	33.5026	-0.208264	0.0133165
ECD_03772_dtd	72.9174	77.8543	0.0945135	0.0133591
ECD_00853_ybjM	8.10913	19.128	1.23806	0.0133743
ECD_02136_eco	30.406	44.6668	0.554845	0.0133743
ECD_03116_panF	38.9053	33.0072	-0.237184	0.0133961
ECD_01637_ydhS	1.11334	2.70016	1.27815	0.0134154
ECD_03619_atpH	2116.33	1670.49	-0.341291	0.0134154
ECD_00426_hemH	30.1225	25.8016	-0.223382	0.0134154
ECD_02876_gpr	7.36942	11.9698	0.699775	0.0134616
ECD_04230_hpaG	3.77911	1.43876	-1.39322	0.0134767
ECD_02964_yqjA	28.6526	34.1944	0.255094	0.0134767
ECD_01247_yciK	30.3503	34.1173	0.16879	0.0134868
ECD_03404_yiaF	204.796	220.504	0.106618	0.0134868
ECD_00404_tesB	28.5912	31.5613	0.142588	0.0135804
ECD_02792_yggX	181.297	187.78	0.0506897	0.0135806
ECD_01680_btuC	26.2829	22.0322	-0.254507	0.013621
ECD_00635_nagB	36.0886	32.9697	-0.130404	0.0136252
ECD_00535_cusB	98.8698	60.9376	-0.698198	0.013631
ECD_00580_citT	2.00381	4.25008	1.08474	0.0136346
ECD_04114_pyrL	461.924	814.304	0.817911	0.0136642
ECD_02423_iscR	206.698	245.707	0.249415	0.0136642
ECD_01932_manB	22.3456	23.8806	0.0958498	0.0136662
ECD_00961_ompA	3140.99	2380.99	-0.399658	0.0137194
ECD_01282_pspB	24.6479	52.1226	1.08045	0.0137247
ECD_03207_yhfA	76.9206	68.4054	-0.169259	0.0137532
ECD_01201_narK	2.64899	5.02892	0.924804	0.0138085
ECD_03769_yihW	38.9601	44.987	0.20751	0.0138085
ECD_03820_priA	15.8107	12.2136	-0.372414	0.0138355
ECD_01761_yeaO	28.4854	46.7099	0.713504	0.013846
ECD_02231_hisP	41.5166	32.8746	-0.336715	0.013846
ECD_01281_pspA	38.8414	42.1071	0.11647	0.0138591
ECD_03274_glpR	69.3896	63.4469	-0.12917	0.0138917
ECD_02954_ygjP	16.1675	26.3586	0.705178	0.0139277
ECD_00186_tilS	49.3343	35.6587	-0.468336	0.0139459
ECD_02560_norV	1.91958	3.92144	1.03059	0.0139787
ECD_03615_atpC	2293.21	1961.21	-0.225626	0.0139787
ECD_00268_betB	40.8908	34.1056	-0.261768	0.0141222
ECD_04268_slt	14.2789	8.83876	-0.691964	0.0141503
ECD_03068_hpf	155.811	171.028	0.13444	0.0141992
ECD_03698_rarD	32.758	31.5691	-0.0533345	0.0141992
ECD_02413_sseA	30.8775	34.7062	0.168638	0.0142292
ECD_02429_hcaR	10.209	6.10864	-0.740917	0.0142306
ECD_01256_yciS	85.8276	98.532	0.19915	0.0142306
ECD_03111_csrD	10.5568	12.8312	0.281489	0.0143005
ECD_01944_rmlC	70.0639	107.492	0.617486	0.0143321
ECD_02895_ygiV	39.5906	52.2262	0.399614	0.0143321
ECD_04279_yjtD	18.0733	25.2733	0.483758	0.0143502
ECD_01064_yceM	29.3278	26.9854	-0.120092	0.0143502
ECD_03450_rhsJ	4.34693	8.6891	0.99921	0.0144048
ECD_03134_yrdD	62.5391	57.5762	-0.119285	0.0144051
ECD_01254_ribA	101.163	104.205	0.0427425	0.0144051
ECD_01409_yncE	19.8401	15.989	-0.311341	0.0144395
ECD_02486_raiA	80.3887	89.3595	0.152628	0.0144395
ECD_03396_eptB	11.2384	9.2126	-0.286755	0.0144538
ECD_01672_ppsR	24.3252	18.2578	-0.413937	0.0144874
ECD_00435_copA	19.7193	27.359	0.472412	0.0146502
ECD_02826	155.615	122.801	-0.341666	0.0146574
ECD_00165_glnD	14.185	8.74259	-0.698238	0.0146612
ECD_02416_iscX	519.917	580.175	0.158206	0.0146612
ECD_02336_hemF	33.736	21.6273	-0.641437	0.0146797
ECD_01840_yecN	76.6834	80.3662	0.0676743	0.0147704
ECD_00740_ybhB	106.124	101.393	-0.0657932	0.0149172
ECD_03094_degQ	25.6524	19.5442	-0.392357	0.0149238
ECD_01677_nlpC	52.8425	47.1996	-0.162923	0.0149895
ECD_00743_bioF	176.254	115.368	-0.61141	0.014995
ECD_01005_agp	4.97456	2.5622	-0.957188	0.0150734
ECD_00122_cueO	19.1181	24.3765	0.350551	0.0150734
ECD_03799_cpxP	56.6576	66.0338	0.220935	0.0150881
ECD_02532_nrdF	3.85095	1.54128	-1.32109	0.0151064
ECD_03927_aphA	19.028	13.0305	-0.546236	0.015163
ECD_03811_glpK	13.3547	10.456	-0.353011	0.0152107
ECD_03080	26.3941	42.0229	0.670957	0.0152787
ECD_00012_htgA	16.8325	27.837	0.725753	0.0152869
ECD_02920_yqiJ	3.47725	7.39785	1.08916	0.0154055
ECD_00886_clpS	101.198	87.6833	-0.206808	0.0154055
ECD_00104_guaC	81.1796	60.8212	-0.416543	0.0154757
ECD_01792_rlmA	48.5603	52.8031	0.120847	0.015476
ECD_02172_rhmT	2.88669	5.26523	0.867083	0.0154772
ECD_01565_ynfM	6.0425	3.33474	-0.857571	0.0154802
ECD_03162_rpsQ	9327.22	8261.93	-0.174968	0.0154868
ECD_00744_bioC	152.597	104.331	-0.548551	0.0155931
ECD_01221_oppF	61.0809	47.5858	-0.36019	0.0155931
ECD_00951_ycbX	23.7774	19.5453	-0.282771	0.0156017
ECD_02426_yfhR	4.09476	7.89745	0.947608	0.0156428
ECD_00205_gloB	18.4843	13.9321	-0.407888	0.0156894
ECD_03468_grxC	527.823	500.192	-0.0775715	0.0157393
ECD_03350_arsR	5.94395	14.5175	1.2883	0.0157813
ECD_01033_ycdZ	99.531	120.712	0.278352	0.0157813
ECD_04089_ytfL	37.1479	33.097	-0.166578	0.0157913
ECD_01596_ydgK	27.8104	39.6969	0.513405	0.0157966
ECD_00863_ybjO	23.9022	33.7411	0.497363	0.0158112
ECD_02190_menH	25.8996	19.8073	-0.3869	0.0158216
ECD_01817_yebE	12.1903	18.9325	0.635135	0.0158476
ECD_03572_yidR	21.0307	28.6632	0.446704	0.0158628
ECD_03309_livJ	20.7346	18.4795	-0.166118	0.0158628
ECD_02127_ccmB	7.41899	13.389	0.851749	0.0159024
ECD_02088_nfo	31.8775	26.226	-0.281542	0.0159024
ECD_00335_aroL	38.9361	44.0403	0.177716	0.0159024
ECD_02362_yffB	61.3212	75.7437	0.304741	0.0159974
ECD_00589_citA	4.72531	7.33539	0.634466	0.0160381
ECD_02614_ygcQ	2.39373	5.5728	1.21914	0.0160578
ECD_01794_yobF	6018.32	4336.58	-0.472804	0.0160872
ECD_03892_yjbB	17.5242	16.6582	-0.0731151	0.0161335
ECD_02550_pncC	58.5827	60.1533	0.0381706	0.0161712
ECD_01789_manZ	187.272	137.641	-0.444221	0.0161939
ECD_02659_gcvA	22.1189	25.9427	0.230051	0.0162362
ECD_03211_pabA	30.6084	38.173	0.318625	0.0162655
ECD_01469_hipA	7.76467	4.80691	-0.691814	0.0162887
ECD_00996_torS	2.12222	3.52578	0.732366	0.016334
ECD_00902_ycaD	26.2149	26.1689	-0.00253012	0.0163665
ECD_03873_nudC	33.4175	42.6384	0.35155	0.0163788
ECD_00847_tfaE	1.75142	5.79541	1.72639	0.0163847
ECD_01717_astC	2.60747	5.20314	0.996731	0.0163854
ECD_00652_kdpD	9.83484	8.79018	-0.162009	0.0163892
ECD_01199_narL	34.3083	41.1805	0.263403	0.0164423
ECD_02297_fryB		7.99832		0.0164581
ECD_02177_nudI	56.2573	45.0668	-0.319974	0.0164618
ECD_00967_mgsA	71.2341	83.6347	0.231534	0.0164663
ECD_02448_glrK	16.7251	18.0287	0.108274	0.0164815
ECD_01560_dmsD	36.2262	44.7988	0.306427	0.0164923
ECD_03136_smf	16.7326	17.9892	0.104464	0.0164993
ECD_00300_mhpR	13.621	19.2083	0.495896	0.0165639
ECD_03531	3.13759	4.41537	0.492877	0.016596
ECD_01622_rnt	40.7307	37.736	-0.110175	0.016642
ECD_01613_ydhI	21.4398	41.9083	0.966948	0.0166593
ECD_02887_yqhH	9.35618	24.7058	1.40086	0.0166599
ECD_04112_pyrI	51.3967	37.6311	-0.449749	0.0166984
ECD_03964_phnP	7.7554	13.1893	0.766096	0.0167465
ECD_01725_ynjD	8.22301	4.36181	-0.91474	0.0167634
ECD_04090_msrA	27.5199	37.0088	0.427395	0.0168277
ECD_04082_ytfF	5.58656	12.6285	1.17664	0.0168688
ECD_03561_yidI	6.47403	13.8726	1.0995	0.0168688
ECD_01102_thiK	28.2644	28.874	0.0307811	0.0168688
ECD_03540	1.45115	6.18502	2.09159	0.016913
ECD_00747_ybhK	24.8093	29.2888	0.23947	0.0169403
ECD_03916_dinF	29.0499	20.439	-0.507208	0.0169416
ECD_03290_yhhW	14.6244	21.7347	0.571625	0.0169682
ECD_02268_fadL	128.38	120.576	-0.0904859	0.0170409
ECD_01062_rimJ	32.5305	24.0919	-0.433246	0.0170554
ECD_01788_manY	169.99	116.999	-0.538946	0.0170961
ECD_04260_deoD	104.062	92.0584	-0.176823	0.0171016
ECD_02199	18.925	29.4846	0.639671	0.0171084
ECD_01361_ydbC	11.4211	20.0955	0.815165	0.0171574
ECD_00190_arfB	35.6464	47.0677	0.400981	0.0171641
ECD_01911_yeeA	9.18577	5.89018	-0.64109	0.0172747
ECD_04068_priB	6090.15	7277.23	0.256913	0.0173317
[truncated: 2,135 more rows]
